# Supplementary material for: Transcriptional alterations in glioma result primarily from DNA methylation–independent mechanisms
Source: HighWire-hosted journal article supplement (doi:10.1101/gr.249219.119), 2019-09-18
Supplement: Supplemental_Table_S1.pdf.pdf [file Supplemental_Table_S1.pdf.pdf]

| Characteristics                        | Mutated IDH1 patients (n=15) |     | WT IDH1 patients (n=55) |     |
|----------------------------------------|------------------------------|-----|-------------------------|-----|
|                                        | Nb of patients               | %   | Nb of patients          | %   |
| Sex                                    |                              |     |                         |     |
| Female                                 | 5/15                         | 33% | 23/55                   | 42% |
| Male                                   | 10/15                        | 67% | 32/55                   | 58% |
| Age at diagnosis (years)               |                              |     |                         |     |
| Mean (SD)                              | 40 (10.4)                    |     | 60 (10.2)               |     |
| Range                                  | [26-63]                      |     | [29-80]                 |     |
| 7p+/10q- (CNV)                         | 0/13                         | 0%  | 23/34                   | 68% |
| unknown status 7p10q                   | 2/15                         | 13% | 21/55                   | 38% |
| Tot 1p19q codeleted (FISH+INA+CNV)     | 9/14                         | 64% | 2/55                    | 4%  |
| unknown status 1p19q                   | 1/15                         | 7%  | 0/55                    | 0%  |
| <i>MGMT</i> promoter methylation (>8%) | 14/15                        | 93% | 25/55                   | 45% |
| Resection                              |                              |     |                         |     |
| Total                                  | 6/15                         | 40% | 23/55                   | 42% |
| Partial                                | 7/15                         | 47% | 31/55                   | 56% |
| Large biopsy                           | 2/15                         | 13% | 1/55                    | 2%  |
| Post-operative treatment               |                              |     |                         |     |
| R + TMZ = "Stupp"                      | 5/15                         | 34% | 41/55                   | 75% |
| Radiotherapy only                      | 2/15                         | 13% | 3/55                    | 5%  |
| Chemotherapy only                      | 4/15                         | 27% | 2/55                    | 4%  |
| No treatment                           | 2/15                         | 13% | 4/55                    | 7%  |
| unknown                                | 2/15                         | 13% | 5/55                    | 9%  |
| Overall survival (years)               |                              |     |                         |     |
| Median                                 | Not reached                  |     | 1.25                    |     |
| Range                                  | [0.1-6.6]                    |     | [0.1-3.8]               |     |

Supplemental table S1: Demographic and molecular features of the 70 patients with glioma. Gain in Chromosome 7p correlating with loss in Chromosome 10q status (7p+/10q-) has been assessed by copy number variation study (CNV). The 1p19q codeletion status has been determined by merging data obtained by Fluorescence *in situ* hybridization (FISH), Internexin Immunostaining (INA) and CNV analyses. *MGMT* methylation is the mean of the methylation of five CpG sites located between the hg19 coordinates 131265507 to 131265526. "Stupp" post-operative treatment combined radiotherapy (R) with temozolomide (TMZ) chemotherapy. SD: standard deviation.
