# Supplementary material for: Transcriptional alterations in glioma result primarily from DNA methylation–independent mechanisms
Source: HighWire-hosted journal article supplement (doi:10.1101/gr.249219.119), 2019-09-18
Supplement: Supplemental_Table_S2.xlsx.xlsx [file Supplemental_Table_S2.xlsx.xlsx]

## Sheet: IDHwt
Supplemental_Table_S2.xlsx List of affected CGI/promoter-controlled genes, identified in IDHwt glioma samples.
gene_name	gene_id	chr	start	end	strand	CpGi_Start	CpGi_End	CpGi_N_probes	Chromatin_ES	Chromatin_NPC	Chromatin_Brain	Defect_IDHwt	Methylation_IDHwt_vs_ctrl
RP11-465B22.5	ENSG00000223823.1	chr1	1072397	1079436	+	1072369	1072847	3	none	H3K27me3	H3K27me3	No Meth/Exp+	no change
TNFRSF4	ENSG00000186827.6	chr1	1146706	1149518	-	1149055	1149524	4	none	none	none	No Meth/Exp+	no change
MXRA8	ENSG00000162576.12	chr1	1288069	1297157	-	1289707	1291126	7	Bivalent	none	none	No Meth/Exp+	no change
ANKRD65	ENSG00000235098.4	chr1	1353800	1357149	-	1355159	1356000	2	none	none	none	No Meth/Exp-	no change
RP4-758J18.7	ENSG00000225905.1	chr1	1355625	1358071	+	1355159	1356000	2	none	none	none	No Meth/Exp-	no change
TMEM88B	ENSG00000205116.3	chr1	1361508	1363167	+	1361560	1361787	3	H3K4me3	none	H3K4me3	Meth+/Exp-	Methylable
VWA1	ENSG00000179403.10	chr1	1370241	1378262	+	1370767	1371449	3	none	H3K4me3	H3K4me3	Meth+/Exp-	Methylable
TPRG1L	ENSG00000158109.10	chr1	3541566	3546691	+	3540767	3542241	11	none	H3K4me3	H3K4me3	No Meth/Exp-	no change
SMIM1	ENSG00000235169.3	chr1	3689352	3692546	+	3688553	3689684	9	none	H3K4me3	none	No Meth/Exp-	no change
RP3-467L1.4	ENSG00000236266.1	chr1	7870302	7887402	-	7887198	7887476	4	none	none	none	Meth+/Exp-	Methylated
GPR157	ENSG00000180758.10	chr1	9160364	9189229	-	9188503	9189743	13	Bivalent	H3K27me3	none	No Meth/Exp+	no change
RP3-510D11.2	ENSG00000234546.2	chr1	9242263	9252148	+	9242167	9243827	7	Bivalent	Bivalent	none	No Meth/Exp+	no change
RBP7	ENSG00000162444.11	chr1	10057264	10076078	+	10057121	10058108	5	Bivalent	Bivalent	none	Meth+/Exp-	Methylable
TMEM51	ENSG00000171729.9	chr1	15479028	15546976	+	15479219	15481471	12	Bivalent	none	none	No Meth/Exp+	no change
FBLIM1	ENSG00000162458.8	chr1	16083102	16113089	+	16085147	16085862	4	none	none	none	No Meth/Exp+	no change
FAM131C	ENSG00000185519.8	chr1	16384264	16400127	-	16399648	16400072	4	Bivalent	Bivalent	H3K4me3	No Meth/Exp-	no change
ARHGEF19	ENSG00000142632.12	chr1	16524349	16539104	-	16532917	16534580	10	H3K4me3	H3K4me3	none	No Meth/Exp+	no change
MST1L	ENSG00000186715.6	chr1	17081405	17096732	-	17085411	17086974	6	none	none	none	Meth+/Exp+	Methylated
PADI2	ENSG00000117115.8	chr1	17393256	17445948	-	17445651	17446088	7	Bivalent	none	H3K4me3	No Meth/Exp-	no change
TMCO4	ENSG00000162542.9	chr1	20008706	20126438	-	20126029	20126780	7	Bivalent	none	none	No Meth/Exp+	no change
CAMK2N1	ENSG00000162545.5	chr1	20808884	20812713	-	20810462	20813511	13	Bivalent	Bivalent	H3K4me3	No Meth/Exp-	no change
HSPG2	ENSG00000142798.12	chr1	22148738	22263790	-	22149683	22149897	4	none	none	none	No Meth/Exp+	no change
E2F2	ENSG00000007968.6	chr1	23832922	23857712	-	23857033	23858089	10	Bivalent	H3K4me3	none	No Meth/Exp+	no change
NIPAL3	ENSG00000001461.12	chr1	24742284	24799466	+	24742671	24743039	3	H3K4me3	Bivalent	H3K4me3	No Meth/Exp-	no change
RUNX3	ENSG00000020633.14	chr1	25226002	25291612	-	25255527	25259005	32	Bivalent	H3K27me3	H3K27me3	Meth+/Exp+	Methylable
LDLRAP1	ENSG00000157978.7	chr1	25870071	25895377	+	25869893	25871042	11	none	H3K4me3	H3K4me3	No Meth/Exp-	no change
STMN1	ENSG00000117632.16	chr1	26210672	26233482	-	26231950	26233624	20	H3K4me3	H3K4me3	H3K4me3	No Meth/Exp-	no change
FAM46B	ENSG00000158246.7	chr1	27331511	27339327	-	27338879	27339441	5	H3K4me3	H3K4me3	none	No Meth/Exp+	no change
RCC1	ENSG00000180198.11	chr1	28832455	28865812	+	28844653	28845293	4	H3K4me3	H3K4me3	H3K4me3	No Meth/Exp+	no change
ADC	ENSG00000142920.12	chr1	33546705	33586131	+	33546524	33547243	11	Bivalent	H3K4me3	H3K4me3	No Meth/Exp-	no change
C1orf94	ENSG00000142698.10	chr1	34632484	34684732	+	34642382	34643024	7	Bivalent	H3K27me3	none	Meth+/Exp+	Methylated
GJA4	ENSG00000187513.8	chr1	35258599	35261348	+	35258564	35258791	2	Bivalent	none	H3K4me3	No Meth/Exp+	no change
CLSPN	ENSG00000092853.9	chr1	36185819	36235568	-	36234924	36235800	11	H3K4me3	H3K4me3	H3K4me3	No Meth/Exp+	no change
EVA1B	ENSG00000142694.6	chr1	36787632	36789755	-	36786500	36789402	12	Bivalent	H3K4me3	H3K4me3	Meth+/Exp+	Methylated
CDCA8	ENSG00000134690.6	chr1	38158090	38175391	+	38157295	38158586	11	H3K4me3	H3K4me3	H3K4me3	No Meth/Exp+	no change
FHL3	ENSG00000183386.5	chr1	38462442	38471278	-	38470617	38471396	4	H3K4me3	H3K4me3	none	No Meth/Exp+	no change
HEYL	ENSG00000163909.6	chr1	40089825	40105617	-	40105010	40105707	6	Bivalent	H3K27me3	none	Meth+/Exp+	Methylated
NT5C1A	ENSG00000116981.3	chr1	40124793	40137710	-	40136988	40138087	7	Bivalent	Bivalent	H3K4me3	No Meth/Exp-	no change
RP1-92O14.3	ENSG00000234694.1	chr1	43820355	43824329	-	43824134	43825059	10	H3K4me3	H3K4me3	H3K4me3	No Meth/Exp-	no change
IPO13	ENSG00000117408.6	chr1	44412611	44433694	+	44412073	44412804	12	H3K4me3	H3K4me3	H3K4me3	No Meth/Exp-	no change
KIF2C	ENSG00000142945.8	chr1	45205490	45233439	+	45205323	45205745	4	H3K4me3	H3K4me3	H3K4me3	No Meth/Exp+	no change
TESK2	ENSG00000070759.12	chr1	45809555	45956872	-	45956345	45956893	5	H3K4me3	Bivalent	H3K4me3	No Meth/Exp-	no change
LURAP1	ENSG00000171357.5	chr1	46669006	46686933	+	46668821	46669258	5	none	H3K4me3	H3K4me3	No Meth/Exp-	no change
FAAH	ENSG00000117480.11	chr1	46859937	46879520	+	46859724	46860291	6	Bivalent	Bivalent	H3K4me3	Meth+/Exp-	Methylable
RP1-18D14.7	ENSG00000226252.1	chr1	47691469	47696422	+	47690980	47691727	6	Bivalent	Bivalent	none	No Meth/Exp-	no change
EPS15	ENSG00000085832.12	chr1	51819935	51985000	-	51984547	51985216	7	H3K4me3	none	H3K4me3	No Meth/Exp-	no change
RP11-191G24.1	ENSG00000227070.1	chr1	51983981	52027301	+	51984547	51985216	7	H3K4me3	none	H3K4me3	No Meth/Exp-	no change
ORC1	ENSG00000085840.8	chr1	52838501	52870131	-	52869867	52870305	9	H3K4me3	H3K4me3	H3K4me3	No Meth/Exp+	no change
GPX7	ENSG00000116157.5	chr1	53068044	53074723	+	53067880	53068608	6	Bivalent	none	H3K4me3	No Meth/Exp+	no change
TTC22	ENSG00000006555.6	chr1	55245385	55266940	-	55266277	55267058	6	none	H3K27me3	H3K27me3	No Meth/Exp-	no change
DHCR24	ENSG00000116133.7	chr1	55315306	55352891	-	55352463	55353328	9	H3K4me3	H3K4me3	H3K4me3	No Meth/Exp-	no change
RP4-794H19.2	ENSG00000234807.4	chr1	59250823	59365384	+	59247461	59250940	24	Bivalent	Bivalent	H3K4me3	No Meth/Exp-	no change
CYP2J2	ENSG00000134716.5	chr1	60358980	60392462	-	60392272	60392583	5	Bivalent	H3K27me3	Bivalent	No Meth/Exp-	no change
KANK4	ENSG00000132854.14	chr1	62702651	62785085	-	62784136	62785133	6	Bivalent	H3K27me3	none	Meth+/Exp-	Methylable
LINC00466	ENSG00000224209.2	chr1	63655660	63782902	-	63782394	63790471	38	Bivalent	Bivalent	none	Meth+/Exp+	Methylated
RP4-792G4.2	ENSG00000230798.1	chr1	63786555	63790112	-	63782394	63790471	38	Bivalent	Bivalent	none	Meth+/Exp+	Methylated
FOXD3	ENSG00000187140.4	chr1	63788730	63790797	+	63782394	63790471	38	Bivalent	Bivalent	none	Meth+/Exp+	Methylated
SGIP1	ENSG00000118473.17	chr1	66999066	67213982	+	66998728	66999060	3	Bivalent	Bivalent	H3K4me3	No Meth/Exp-	no change
GADD45A	ENSG00000116717.7	chr1	68150744	68154021	+	68150913	68152270	6	H3K4me3	H3K4me3	H3K4me3	No Meth/Exp+	no change
GNG12	ENSG00000172380.5	chr1	68167149	68299150	-	68298371	68299315	4	Bivalent	Bivalent	Bivalent	No Meth/Exp+	no change
ARL5AP3	ENSG00000228431.1	chr1	68515043	68515428	-	68516236	68516473	6	none	none	H3K4me3	No Meth/Exp+	no change
DEPDC1	ENSG00000024526.12	chr1	68939835	68962904	-	68962283	68963006	9	H3K4me3	none	H3K4me3	No Meth/Exp+	no change
LRRC7	ENSG00000033122.14	chr1	70034081	70617628	+	70032967	70034495	11	Bivalent	Bivalent	none	Meth+/Exp-	Methylable
PIN1P1	ENSG00000229359.2	chr1	70385005	70386000	+	70385043	70385270	3	none	none	none	No Meth/Exp-	no change
ST6GALNAC3	ENSG00000184005.9	chr1	76540404	77100286	+	76540147	76540653	8	none	H3K4me3	H3K4me3	No Meth/Exp-	no change
AK5	ENSG00000154027.14	chr1	77747736	78025651	+	77747314	77748224	9	Bivalent	Bivalent	H3K4me3	No Meth/Exp-	no change
NEXN	ENSG00000162614.14	chr1	78354198	78409580	+	78354381	78354673	2	none	H3K4me3	H3K4me3	No Meth/Exp+	no change
ELTD1	ENSG00000162618.8	chr1	79355449	79472403	-	79472281	79472537	7	none	H3K4me3	none	Meth+/Exp+	Methylated
RP11-475O6.1	ENSG00000233008.1	chr1	84041459	84326706	-	84326267	84326838	6	none	none	H3K4me3	No Meth/Exp-	no change
TTLL7	ENSG00000137941.12	chr1	84330711	84464833	-	84464223	84465232	5	Bivalent	Bivalent	H3K4me3	No Meth/Exp-	no change
PRKACB	ENSG00000142875.15	chr1	84543745	84704181	+	84543146	84544261	8	H3K4me3	H3K4me3	H3K4me3	No Meth/Exp-	no change
GNG5	ENSG00000174021.6	chr1	84964008	84972248	-	84971344	84972491	13	H3K4me3	H3K4me3	H3K4me3	No Meth/Exp+	no change
LPAR3	ENSG00000171517.5	chr1	85277285	85358896	-	85358359	85359187	5	Bivalent	none	none	Meth+/Exp-	Methylable
SYDE2	ENSG00000097096.8	chr1	85622556	85666729	-	85665818	85667650	11	H3K4me3	none	none	No Meth/Exp-	no change
CYR61	ENSG00000142871.11	chr1	86046444	86049645	+	86046362	86047240	9	H3K4me3	H3K4me3	none	No Meth/Exp+	no change
LRRC8B	ENSG00000197147.8	chr1	89990395	90063423	+	89989810	89990986	8	H3K4me3	Bivalent	H3K4me3	No Meth/Exp-	no change
RP5-1007M22.2	ENSG00000231999.2	chr1	90048800	90098453	-	90098230	90099292	5	Bivalent	Bivalent	H3K4me3	No Meth/Exp-	no change
RP4-665J23.2	ENSG00000225446.1	chr1	91317316	91319843	+	91316249	91317390	7	Bivalent	none	none	No Meth/Exp-	no change
BTBD8	ENSG00000189195.5	chr1	92545862	92613393	+	92545819	92546480	7	H3K4me3	H3K4me3	H3K4me3	No Meth/Exp-	no change
C1orf146	ENSG00000203910.4	chr1	92683497	92711370	+	92683438	92683682	5	none	none	none	No Meth/Exp-	no change
FAM69A	ENSG00000154511.7	chr1	93307724	93427057	-	93426512	93427754	7	H3K4me3	Bivalent	H3K4me3	No Meth/Exp-	no change
F3	ENSG00000117525.9	chr1	94994781	95007356	-	95006837	95008051	12	none	H3K4me3	H3K4me3	No Meth/Exp+	no change
LINC01057	ENSG00000224081.3	chr1	95104017	95285837	-	95285602	95286319	7	Bivalent	none	H3K4me3	No Meth/Exp+	no change
CNN3	ENSG00000117519.11	chr1	95362507	95392834	-	95391837	95393116	11	H3K4me3	H3K4me3	H3K4me3	No Meth/Exp+	no change
TMEM56	ENSG00000152078.5	chr1	95582894	95663163	+	95582750	95583572	8	Bivalent	Bivalent	H3K4me3	No Meth/Exp-	no change
RP11-57H12.3	ENSG00000226026.1	chr1	95628775	95699538	-	95699725	95700142	5	H3K4me3	none	H3K4me3	No Meth/Exp-	no change
MIR137HG	ENSG00000225206.4	chr1	98453556	98515419	-	98510966	98511710	6	Bivalent	Bivalent	none	No Meth/Exp-	no change
VAV3	ENSG00000134215.11	chr1	108113782	108507766	-	108507251	108507841	3	Bivalent	H3K4me3	Bivalent	No Meth/Exp+	no change
HENMT1	ENSG00000162639.11	chr1	109190912	109204148	-	109203593	109204378	7	none	H3K27me3	H3K4me3	Meth+/Exp-	Methylated
AKNAD1	ENSG00000162641.14	chr1	109358520	109506106	-	109505681	109506214	5	H3K4me3	H3K4me3	H3K4me3	No Meth/Exp+	no change
SORT1	ENSG00000134243.7	chr1	109852192	109940573	-	109940074	109940894	3	H3K4me3	H3K4me3	H3K4me3	No Meth/Exp-	no change
ALX3	ENSG00000156150.6	chr1	110602616	110613322	-	110610265	110613303	13	Bivalent	none	none	Meth+/Exp+	Methylable
KCNA2	ENSG00000177301.9	chr1	111136202	111174096	-	111148983	111150186	7	Bivalent	Bivalent	H3K4me3	No Meth/Exp-	no change
DENND2D	ENSG00000162777.12	chr1	111729796	111747157	-	111746337	111747303	8	none	H3K27me3	none	No Meth/Exp+	no change
RHOC	ENSG00000155366.12	chr1	113243728	113250056	-	113249342	113250198	8	Bivalent	none	H3K4me3	No Meth/Exp+	no change
RP11-31F15.2	ENSG00000238198.1	chr1	113554309	113615727	-	113615591	113616260	9	H3K4me3	H3K4me3	H3K4me3	No Meth/Exp-	no change
SLC22A15	ENSG00000163393.8	chr1	116519119	116612675	+	116518757	116519537	10	none	Bivalent	H3K4me3	No Meth/Exp-	no change
CD58	ENSG00000116815.11	chr1	117057157	117113661	-	117112960	117113883	6	none	none	H3K4me3	No Meth/Exp+	no change
PTGFRN	ENSG00000134247.9	chr1	117452679	117532980	+	117452203	117453452	10	none	H3K4me3	H3K4me3	No Meth/Exp+	no change
FAM72B	ENSG00000188610.8	chr1	120837756	120855681	+	120835961	120839391	10	none	none	none	No Meth/Exp+	no change
RP11-344P13.6	ENSG00000272583.1	chr1	121260164	121260627	-	121260857	121261525	5	none	Bivalent	H3K4me3	Meth+/Exp-	Methylable
RP11-435B5.4	ENSG00000185044.10	chr1	143354963	143467632	-	143467293	143467675	2	none	none	none	No Meth/Exp-	no change
FAM72D	ENSG00000215784.4	chr1	143896452	143913143	-	143912736	143916156	4	H3K4me3	H3K4me3	none	No Meth/Exp+	no change
FMO5	ENSG00000131781.8	chr1	146646930	146714700	-	146714089	146715278	10	H3K4me3	H3K4me3	H3K4me3	No Meth/Exp-	no change
RP11-495P10.4	ENSG00000235988.1	chr1	147789799	147790129	-	147789652	147790094	3	Bivalent	H3K27me3	none	Meth+/Exp+	Methylated
HIST2H3D	ENSG00000183598.3	chr1	149784826	149785236	-	149784592	149785212	3	H3K4me3	H3K4me3	none	No Meth/Exp+	no change
C1orf54	ENSG00000118292.4	chr1	150240600	150253327	+	150241047	150241654	10	H3K4me3	H3K4me3	H3K4me3	No Meth/Exp+	no change
ADAMTSL4-AS1	ENSG00000203804.3	chr1	150533480	150533969	-	150534075	150534301	3	H3K4me3	H3K4me3	H3K4me3	No Meth/Exp+	no change
RP11-126K1.6	ENSG00000237976.1	chr1	151319443	151320503	+	151319326	151319545	3	H3K4me3	H3K4me3	H3K4me3	No Meth/Exp+	no change
C2CD4D	ENSG00000225556.1	chr1	151810295	151813033	-	151812253	151812525	3	Bivalent	none	Bivalent	No Meth/Exp-	no change
S100A11	ENSG00000163191.5	chr1	152004982	152020383	-	152008838	152009112	4	none	Bivalent	Bivalent	No Meth/Exp+	no change
FLG-AS1	ENSG00000237975.2	chr1	152140601	152339163	+	152161321	152161928	5	none	none	none	Meth+/Exp-	Methylated
S100A6	ENSG00000197956.5	chr1	153507075	153508720	-	153508424	153508840	7	Bivalent	H3K27me3	H3K4me3	No Meth/Exp+	no change
NPR1	ENSG00000169418.9	chr1	153651113	153666468	+	153650830	153652375	15	Bivalent	Bivalent	Bivalent	No Meth/Exp+	no change
C1orf61	ENSG00000125462.12	chr1	156374042	156400493	-	156390403	156391581	5	Bivalent	H3K27me3	none	No Meth/Exp+	no change
IQGAP3	ENSG00000183856.6	chr1	156495197	156542396	-	156542099	156542502	5	H3K4me3	none	H3K4me3	No Meth/Exp+	no change
KIRREL	ENSG00000183853.13	chr1	157963063	158070052	+	157963540	157963947	3	H3K4me3	H3K4me3	H3K4me3	No Meth/Exp+	no change
C1orf204	ENSG00000188004.5	chr1	159804264	159825137	-	159824006	159825011	6	Bivalent	H3K27me3	H3K4me3	No Meth/Exp-	no change
CCDC19	ENSG00000213085.5	chr1	159842154	159869953	-	159869901	159870143	6	none	H3K27me3	H3K27me3	Meth+/Exp+	Methylable
TAGLN2	ENSG00000158710.10	chr1	159887897	159895522	-	159894329	159895398	7	none	H3K4me3	Bivalent	No Meth/Exp+	no change
KCNJ10	ENSG00000177807.6	chr1	160007257	160040038	-	160040128	160040668	8	Bivalent	none	H3K4me3	No Meth/Exp-	no change
IGSF8	ENSG00000162729.9	chr1	160061130	160068733	-	160068040	160068430	4	H3K4me3	none	H3K4me3	No Meth/Exp-	no change
HSPA6	ENSG00000173110.6	chr1	161494036	161496681	+	161494024	161495356	6	Bivalent	none	H3K4me3	No Meth/Exp+	no change
HSPA7	ENSG00000225217.1	chr1	161576081	161578007	+	161575534	161576908	5	H3K27me3	H3K27me3	none	Meth+/Exp+	Methylable
NUF2	ENSG00000143228.8	chr1	163236366	163325554	+	163291479	163292021	8	H3K4me3	H3K4me3	H3K4me3	No Meth/Exp+	no change
ATP1B1	ENSG00000143153.8	chr1	169074935	169101960	+	169074766	169076411	9	none	none	none	No Meth/Exp-	no change
PRRX1	ENSG00000116132.7	chr1	170631869	170708560	+	170633274	170634178	5	Bivalent	Bivalent	Bivalent	No Meth/Exp+	no change
DNM3	ENSG00000197959.9	chr1	171810621	172387606	+	171810467	171811325	7	Bivalent	Bivalent	H3K4me3	No Meth/Exp-	no change
KIAA0040	ENSG00000235750.5	chr1	175126123	175162135	-	175161900	175162364	8	Bivalent	Bivalent	none	No Meth/Exp+	no change
LAMC1	ENSG00000135862.5	chr1	182992595	183114727	+	182991804	182993370	6	H3K4me3	H3K4me3	H3K4me3	No Meth/Exp+	no change
FAM129A	ENSG00000135842.12	chr1	184759858	184943682	-	184942862	184943777	7	Bivalent	Bivalent	none	No Meth/Exp+	no change
HMCN1	ENSG00000143341.7	chr1	185703683	186160085	+	185703458	185703662	7	Bivalent	Bivalent	Bivalent	No Meth/Exp+	no change
KIF14	ENSG00000118193.7	chr1	200520628	200589862	-	200589552	200590124	7	H3K4me3	H3K4me3	H3K4me3	No Meth/Exp+	no change
CSRP1	ENSG00000159176.9	chr1	201452658	201478584	-	201475885	201476516	7	Bivalent	H3K4me3	H3K4me3	No Meth/Exp-	no change
RP11-134G8.7	ENSG00000224536.1	chr1	201476369	201502736	+	201475885	201476516	7	Bivalent	H3K4me3	H3K4me3	No Meth/Exp-	no change
PPP1R12B	ENSG00000077157.16	chr1	202317827	202561834	+	202317657	202318196	8	H3K4me3	H3K4me3	H3K4me3	No Meth/Exp-	no change
PLEKHA6	ENSG00000143850.8	chr1	204187979	204346793	-	204346732	204347430	5	Bivalent	Bivalent	H3K4me3	No Meth/Exp-	no change
PIK3C2B	ENSG00000133056.9	chr1	204391756	204463852	-	204463293	204464086	3	none	none	H3K4me3	No Meth/Exp-	no change
KLHDC8A	ENSG00000162873.10	chr1	205305220	205326218	-	205312493	205313576	3	Bivalent	Bivalent	none	No Meth/Exp+	no change
LEMD1	ENSG00000186007.5	chr1	205350506	205425082	-	205424829	205426556	12	none	Bivalent	none	No Meth/Exp+	no change
PM20D1	ENSG00000162877.8	chr1	205797150	205819260	-	205818898	205819191	3	none	none	none	Meth+/Exp-	Methylated
FAIM3	ENSG00000162894.7	chr1	207077731	207096592	-	207082693	207083202	4	Bivalent	none	none	No Meth/Exp+	no change
CD55	ENSG00000196352.9	chr1	207494853	207534311	+	207494543	207495364	7	H3K4me3	Bivalent	H3K4me3	Meth+/Exp-	Methylable
CR2	ENSG00000117322.12	chr1	207627575	207663240	+	207627531	207628280	7	Bivalent	H3K27me3	Bivalent	Meth+/Exp-	Methylable
RP1-28O10.1	ENSG00000227591.1	chr1	209834709	209897470	-	209848443	209849428	7	Bivalent	none	H3K4me3	No Meth/Exp-	no change
G0S2	ENSG00000123689.5	chr1	209848765	209849733	+	209848443	209849428	7	Bivalent	none	H3K4me3	No Meth/Exp+	no change
SYT14	ENSG00000143469.12	chr1	210111538	210337636	+	210111179	210112054	3	none	Bivalent	H3K4me3	No Meth/Exp-	no change
SERTAD4	ENSG00000082497.7	chr1	210406144	210419976	+	210405952	210407250	2	Bivalent	Bivalent	none	No Meth/Exp-	no change
KCNH1	ENSG00000143473.7	chr1	210856555	211307457	-	211306667	211307675	5	Bivalent	H3K4me3	H3K4me3	Meth+/Exp-	Methylable
TRAF5	ENSG00000082512.10	chr1	211499957	211548288	+	211500151	211500636	3	Bivalent	none	H3K4me3	No Meth/Exp+	no change
NEK2	ENSG00000117650.8	chr1	211836114	211848960	-	211848641	211849176	6	H3K4me3	H3K4me3	H3K4me3	No Meth/Exp+	no change
LPGAT1	ENSG00000123684.8	chr1	211916799	212004114	-	212003431	212004280	7	Bivalent	none	H3K4me3	No Meth/Exp-	no change
DTL	ENSG00000143476.13	chr1	212208919	212280742	+	212208837	212209364	7	H3K4me3	H3K4me3	H3K4me3	No Meth/Exp+	no change
TMEM206	ENSG00000065600.8	chr1	212537273	212588243	-	212587591	212588284	5	none	H3K4me3	H3K4me3	No Meth/Exp-	no change
VASH2	ENSG00000143494.11	chr1	213123862	213165379	+	213123647	213125092	10	none	none	none	No Meth/Exp+	no change
CENPF	ENSG00000117724.8	chr1	214776538	214837931	+	214776256	214776935	13	H3K4me3	H3K4me3	H3K4me3	No Meth/Exp+	no change
SPATA17	ENSG00000162814.6	chr1	217804666	218045038	+	217804267	217804477	4	H3K4me3	H3K4me3	H3K4me3	No Meth/Exp+	no change
TMEM63A	ENSG00000196187.7	chr1	226033237	226070069	-	226069605	226070898	12	none	H3K4me3	H3K4me3	No Meth/Exp-	no change
LEFTY2	ENSG00000143768.7	chr1	226124298	226129189	-	226127112	226127695	3	none	H3K27me3	none	Meth+/Exp+	Methylated
TRIM17	ENSG00000162931.7	chr1	228595641	228604562	-	228603706	228604567	6	Bivalent	none	none	No Meth/Exp-	no change
RHOU	ENSG00000116574.4	chr1	228870824	228882416	+	228870810	228872297	11	Bivalent	Bivalent	H3K4me3	No Meth/Exp-	no change
PGBD5	ENSG00000177614.5	chr1	230457392	230561475	-	230561103	230562702	7	Bivalent	H3K4me3	H3K4me3	No Meth/Exp-	no change
C1orf198	ENSG00000119280.12	chr1	230972865	231005335	-	231003631	231004655	14	Bivalent	H3K4me3	H3K4me3	No Meth/Exp-	no change
MLK4	ENSG00000143674.6	chr1	233463514	233520894	+	233463526	233464414	4	Bivalent	Bivalent	none	No Meth/Exp-	no change
KCNK1	ENSG00000135750.10	chr1	233749750	233808258	+	233749373	233750314	9	Bivalent	none	H3K4me3	Meth+/Exp-	Methylable
NID1	ENSG00000116962.10	chr1	236139130	236228462	-	236227682	236228817	8	Bivalent	Bivalent	none	No Meth/Exp+	no change
RYR2	ENSG00000198626.11	chr1	237205505	237997288	+	237205126	237206644	8	Bivalent	Bivalent	none	Meth+/Exp-	Methylated
RFKP1	ENSG00000215802.3	chr1	240986306	240986733	-	240986654	240986909	4	none	none	none	No Meth/Exp-	no change
RP11-527D7.1	ENSG00000225554.1	chr1	241587592	241596792	+	241587601	241587883	3	Bivalent	Bivalent	none	No Meth/Exp-	no change
EXO1	ENSG00000174371.12	chr1	242011269	242058450	+	242011151	242011744	9	H3K4me3	H3K4me3	H3K4me3	No Meth/Exp+	no change
C1orf101	ENSG00000179397.13	chr1	244617679	244804479	+	244624501	244624920	5	none	none	H3K4me3	No Meth/Exp-	no change
RP11-438H8.8	ENSG00000226191.3	chr1	248099363	248100815	-	248100325	248100726	7	H3K4me3	none	none	Meth+/Exp-	Methylated
OR2L13	ENSG00000196071.3	chr1	248100493	248264224	+	248100325	248100726	7	H3K4me3	none	none	Meth+/Exp-	Methylated
PXDN	ENSG00000130508.6	chr2	1635659	1748624	-	1746833	1748971	11	H3K4me3	H3K4me3	H3K4me3	No Meth/Exp+	no change
MYT1L	ENSG00000186487.13	chr2	1792885	2335032	-	1846426	1846908	4	H3K27me3	none	none	No Meth/Exp-	no change
SOX11	ENSG00000176887.5	chr2	5832799	5841516	+	5832041	5834208	7	Bivalent	H3K4me3	none	No Meth/Exp+	no change
RRM2	ENSG00000171848.9	chr2	10262455	10271545	+	10262173	10263481	10	H3K4me3	H3K4me3	none	No Meth/Exp+	no change
ODC1	ENSG00000115758.8	chr2	10580094	10588630	-	10587827	10589155	9	Bivalent	H3K4me3	H3K4me3	No Meth/Exp+	no change
NTSR2	ENSG00000169006.6	chr2	11798304	11810290	-	11809606	11810433	7	none	H3K27me3	none	Meth+/Exp-	Methylable
TRIB2	ENSG00000071575.7	chr2	12857015	12882860	+	12856625	12859019	18	H3K4me3	H3K4me3	H3K4me3	No Meth/Exp+	no change
OSR1	ENSG00000143867.5	chr2	19551246	19558414	-	19555789	19558403	8	Bivalent	Bivalent	none	No Meth/Exp+	no change
SDC1	ENSG00000115884.6	chr2	20400558	20425194	-	20423088	20425767	17	H3K4me3	none	H3K4me3	No Meth/Exp+	no change
APOB	ENSG00000084674.9	chr2	21224301	21266945	-	21266669	21266961	5	Bivalent	H3K27me3	none	No Meth/Exp-	no change
TP53I3	ENSG00000115129.9	chr2	24300303	24308731	-	24307026	24307678	4	H3K4me3	H3K4me3	H3K4me3	No Meth/Exp+	no change
CENPO	ENSG00000138092.6	chr2	25016005	25045245	+	25015879	25016627	13	H3K4me3	H3K4me3	H3K4me3	No Meth/Exp+	no change
DTNB	ENSG00000138101.14	chr2	25600067	25896503	-	25895902	25896856	6	none	none	H3K4me3	No Meth/Exp-	no change
EMILIN1	ENSG00000138080.9	chr2	27301435	27309271	+	27305312	27305612	3	none	none	none	No Meth/Exp+	no change
CLIP4	ENSG00000115295.15	chr2	29320571	29412509	+	29337983	29338909	9	Bivalent	Bivalent	H3K4me3	No Meth/Exp-	no change
GALNT14	ENSG00000158089.10	chr2	31133333	31378068	-	31360321	31361821	12	Bivalent	H3K27me3	none	Meth+/Exp-	Methylable
STRN	ENSG00000115808.7	chr2	37070783	37193615	-	37193131	37194287	4	H3K4me3	H3K4me3	H3K4me3	No Meth/Exp-	no change
PREPL	ENSG00000138078.11	chr2	44543420	44589001	-	44588954	44589358	9	H3K4me3	H3K4me3	H3K4me3	No Meth/Exp-	no change
CALM2	ENSG00000143933.12	chr2	47387221	47403740	-	47402809	47404105	10	H3K4me3	H3K4me3	H3K4me3	No Meth/Exp-	no change
EPCAM	ENSG00000119888.6	chr2	47572297	47614740	+	47596629	47597256	4	none	Bivalent	none	Meth+/Exp-	Methylable
KCNK12	ENSG00000184261.4	chr2	47743720	47798078	-	47796923	47799166	11	Bivalent	none	Bivalent	Meth+/Exp-	Methylable
GTF2A1L	ENSG00000242441.3	chr2	48844937	48960287	+	48844751	48844985	5	none	none	none	No Meth/Exp+	no change
RTN4	ENSG00000115310.13	chr2	55199325	55339757	-	55276555	55278044	6	H3K4me3	H3K4me3	H3K4me3	No Meth/Exp-	no change
AC007743.1	ENSG00000233251.3	chr2	56400669	56412905	-	56410865	56412539	9	Bivalent	Bivalent	H3K4me3	No Meth/Exp-	no change
CCDC85A	ENSG00000055813.5	chr2	56411258	56613308	+	56410865	56412539	9	Bivalent	Bivalent	H3K4me3	No Meth/Exp-	no change
VRK2	ENSG00000028116.12	chr2	58134786	58387055	+	58273642	58274422	6	H3K4me3	none	H3K4me3	Meth+/Exp-	Methylable
PPP3R1	ENSG00000221823.6	chr2	68405989	68483369	-	68479061	68480040	2	H3K4me3	H3K4me3	H3K4me3	No Meth/Exp-	no change
TGFA	ENSG00000163235.11	chr2	70674412	70781325	-	70780049	70781577	14	Bivalent	Bivalent	Bivalent	No Meth/Exp-	no change
VAX2	ENSG00000116035.2	chr2	71127720	71160576	+	71126720	71129209	25	Bivalent	Bivalent	Bivalent	Meth+/Exp+	Methylated
ANKRD53	ENSG00000144031.7	chr2	71205510	71212626	+	71205563	71206529	5	Bivalent	none	none	No Meth/Exp+	no change
PAIP2B	ENSG00000124374.8	chr2	71409869	71454213	-	71453588	71454318	7	H3K4me3	Bivalent	H3K4me3	No Meth/Exp-	no change
EXOC6B	ENSG00000144036.10	chr2	72403113	73053170	-	73052637	73053227	4	H3K4me3	H3K4me3	H3K4me3	No Meth/Exp-	no change
MTHFD2	ENSG00000065911.7	chr2	74425689	74444692	+	74425444	74426423	11	H3K4me3	H3K4me3	H3K4me3	No Meth/Exp+	no change
M1AP	ENSG00000159374.13	chr2	74785010	74875465	-	74875128	74875562	8	none	H3K27me3	H3K27me3	Meth+/Exp-	Methylated
DNAH6	ENSG00000115423.14	chr2	84743579	85046713	+	84743463	84743685	7	none	H3K4me3	H3K4me3	No Meth/Exp-	no change
VAMP5	ENSG00000168899.4	chr2	85811531	85820535	+	85811340	85811855	4	Bivalent	none	none	No Meth/Exp+	no change
AC105053.4	ENSG00000232504.4	chr2	86116403	86118103	+	86115590	86116327	5	Bivalent	Bivalent	H3K4me3	No Meth/Exp-	no change
ANKRD36BP2	ENSG00000230006.3	chr2	89065324	89106126	+	89064493	89065513	10	Bivalent	Bivalent	Bivalent	Meth+/Exp-	Methylable
AC103563.8	ENSG00000233850.1	chr2	95690938	95692454	-	95690857	95692431	9	Bivalent	Bivalent	Bivalent	Meth+/Exp-	Methylable
MAL	ENSG00000172005.6	chr2	95691422	95719737	+	95690857	95692431	9	Bivalent	Bivalent	Bivalent	Meth+/Exp-	Methylable
KCNIP3	ENSG00000115041.8	chr2	95963052	96051825	+	96011132	96013197	9	Bivalent	Bivalent	H3K4me3	No Meth/Exp-	no change
FAHD2CP	ENSG00000231584.4	chr2	96676299	96689128	+	96676160	96676733	2	H3K4me3	H3K4me3	H3K4me3	No Meth/Exp-	no change
AC021188.4	ENSG00000230747.1	chr2	96973001	96987469	-	96987027	96987888	4	Bivalent	H3K4me3	Bivalent	No Meth/Exp+	no change
ITPRIPL1	ENSG00000198885.5	chr2	96991069	96994091	+	96990857	96991283	6	Bivalent	none	none	No Meth/Exp+	no change
NCAPH	ENSG00000121152.5	chr2	97001525	97039583	+	97001429	97001898	4	H3K4me3	H3K4me3	H3K4me3	No Meth/Exp+	no change
FAM178B	ENSG00000168754.9	chr2	97541620	97684175	-	97651764	97652441	4	none	none	none	No Meth/Exp-	no change
CNGA3	ENSG00000144191.7	chr2	98962618	99015064	+	98962873	98964187	9	Bivalent	H3K27me3	none	No Meth/Exp+	no change
C2ORF15	ENSG00000273045.1	chr2	99757948	99767950	+	99757355	99758220	9	none	H3K4me3	H3K4me3	No Meth/Exp-	no change
IL1R1	ENSG00000115594.7	chr2	102681004	102796334	+	102758806	102759577	2	Bivalent	H3K27me3	Bivalent	No Meth/Exp+	no change
IL18R1	ENSG00000115604.6	chr2	102927989	103015218	+	102972118	102972596	3	Bivalent	none	H3K4me3	No Meth/Exp+	no change
SLC9A2	ENSG00000115616.2	chr2	103236166	103327777	+	103235376	103236554	7	Bivalent	Bivalent	Bivalent	Meth+/Exp-	Methylable
AC010884.1	ENSG00000224509.1	chr2	105552869	105654954	-	105654249	105654771	8	H3K4me3	H3K4me3	H3K4me3	No Meth/Exp-	no change
RGPD3	ENSG00000153165.14	chr2	107021446	107084832	-	107082328	107084936	3	none	none	none	No Meth/Exp-	no change
RGPD4	ENSG00000196862.8	chr2	108443388	108507297	+	108443279	108446501	6	none	none	none	No Meth/Exp-	no change
ACOXL	ENSG00000153093.14	chr2	111490150	111875799	+	111489977	111490884	3	Bivalent	H3K27me3	H3K27me3	Meth+/Exp+	Methylable
CKAP2L	ENSG00000169607.8	chr2	113493930	113522254	-	113521918	113522574	10	H3K4me3	H3K4me3	H3K4me3	No Meth/Exp+	no change
AC010982.1	ENSG00000234199.2	chr2	114737146	114764879	+	114736853	114737689	4	none	none	none	No Meth/Exp+	no change
AC110769.3	ENSG00000243179.1	chr2	114737486	114740835	+	114736853	114737689	4	none	none	none	No Meth/Exp+	no change
DPP10	ENSG00000175497.12	chr2	115199876	116603328	+	115918737	115920765	11	Bivalent	none	none	Meth+/Exp-	Methylable
RP11-19E11.1	ENSG00000258910.2	chr2	119591276	119592686	-	119592602	119593845	6	Bivalent	Bivalent	Bivalent	Meth+/Exp+	Methylated
C1QL2	ENSG00000144119.3	chr2	119913819	119916465	-	119914126	119916663	15	Bivalent	H3K27me3	Bivalent	Meth+/Exp-	Methylable
STEAP3	ENSG00000115107.15	chr2	119981384	120023228	+	119981079	119981818	7	Bivalent	none	none	No Meth/Exp+	no change
SCTR	ENSG00000080293.5	chr2	120197419	120282070	-	120281661	120282211	4	Bivalent	Bivalent	H3K27me3	Meth+/Exp-	Methylable
GLI2	ENSG00000074047.16	chr2	121493199	121750229	+	121492857	121495234	15	H3K4me3	H3K4me3	Bivalent	No Meth/Exp+	no change
GYPC	ENSG00000136732.10	chr2	127413509	127454246	+	127413696	127414171	3	none	H3K4me3	H3K4me3	No Meth/Exp+	no change
BIN1	ENSG00000136717.10	chr2	127805603	127864931	-	127863642	127865288	10	Bivalent	none	H3K4me3	No Meth/Exp-	no change
AC079776.7	ENSG00000225449.2	chr2	130724165	130738039	-	130737205	130737718	3	Bivalent	none	none	Meth+/Exp-	Methylated
RAB6C	ENSG00000222014.4	chr2	130737235	130740311	+	130737205	130737718	3	Bivalent	none	none	Meth+/Exp-	Methylated
AC018804.7	ENSG00000213225.6	chr2	130986949	130989679	+	130986131	130987183	4	none	none	none	No Meth/Exp-	no change
AC073869.1	ENSG00000233087.4	chr2	132118066	132121731	-	132121263	132121762	2	none	none	none	Meth+/Exp-	Methylated
AC073869.20	ENSG00000217950.3	chr2	132200167	132202467	-	132202265	132203257	7	none	none	none	No Meth/Exp-	no change
LYPD1	ENSG00000150551.10	chr2	133402426	133429152	-	133426652	133428870	11	Bivalent	H3K4me3	none	No Meth/Exp+	no change
AC093391.2	ENSG00000231890.3	chr2	136742746	136779888	+	136742687	136743595	8	H3K4me3	H3K4me3	H3K4me3	No Meth/Exp+	no change
AC016910.1	ENSG00000232377.1	chr2	144694640	144721723	+	144694666	144695180	4	Bivalent	Bivalent	H3K4me3	No Meth/Exp-	no change
ZEB2-AS1	ENSG00000238057.4	chr2	145275664	145279058	+	145273456	145275378	9	Bivalent	H3K4me3	none	No Meth/Exp-	no change
KIF5C	ENSG00000168280.12	chr2	149632819	149883273	+	149632682	149633882	8	H3K4me3	H3K4me3	H3K4me3	No Meth/Exp-	no change
RND3	ENSG00000115963.9	chr2	151324709	151395525	-	151341742	151343191	4	none	H3K4me3	none	No Meth/Exp+	no change
NMI	ENSG00000123609.6	chr2	152126979	152146571	-	152145869	152146319	4	none	H3K27me3	none	No Meth/Exp+	no change
FMNL2	ENSG00000157827.15	chr2	153191751	153506348	+	153191492	153192974	11	H3K4me3	H3K4me3	H3K4me3	No Meth/Exp-	no change
AC061961.2	ENSG00000235949.1	chr2	155552974	155554329	-	155554005	155556069	12	Bivalent	Bivalent	none	Meth+/Exp-	Methylable
KCNJ3	ENSG00000162989.3	chr2	155554811	155714863	+	155554005	155556069	12	Bivalent	Bivalent	none	Meth+/Exp-	Methylable
ITGB6	ENSG00000115221.6	chr2	160956177	161128399	-	161126364	161126825	4	H3K4me3	none	H3K4me3	No Meth/Exp+	no change
GCA	ENSG00000115271.6	chr2	163175350	163228105	+	163200575	163201025	5	H3K4me3	none	H3K4me3	No Meth/Exp-	no change
LRP2	ENSG00000081479.8	chr2	169983619	170219195	-	170218314	170219203	5	Bivalent	H3K4me3	Bivalent	No Meth/Exp-	no change
RAPGEF4	ENSG00000091428.13	chr2	173600002	173917621	+	173600281	173600970	5	Bivalent	Bivalent	Bivalent	No Meth/Exp-	no change
MLTK	ENSG00000091436.12	chr2	173940163	174132738	+	173940414	173941271	7	none	none	H3K4me3	No Meth/Exp+	no change
CDCA7	ENSG00000144354.9	chr2	174219548	174233725	+	174219533	174220368	4	none	H3K4me3	Bivalent	No Meth/Exp+	no change
HOXD12	ENSG00000170178.5	chr2	176964458	176966408	+	176964062	176965509	10	Bivalent	none	none	Meth+/Exp+	Methylated
HOXD-AS2	ENSG00000237380.2	chr2	176986339	177001826	-	177001221	177001783	3	Bivalent	none	H3K27me3	No Meth/Exp+	no change
HOXD9	ENSG00000128709.10	chr2	176987088	176989853	+	176986424	176988291	13	none	Bivalent	H3K27me3	Meth+/Exp+	Methylated
HOXD8	ENSG00000175879.7	chr2	176994422	176997423	+	176993479	176995557	14	Bivalent	Bivalent	H3K27me3	Meth+/Exp+	Methylated
HOXD1	ENSG00000128645.11	chr2	177053307	177055688	+	177052957	177054350	11	Bivalent	H3K27me3	Bivalent	Meth+/Exp-	Methylable
AC017048.4	ENSG00000224577.1	chr2	177502438	177520686	+	177502240	177502910	5	Bivalent	Bivalent	none	No Meth/Exp+	no change
PDE11A	ENSG00000128655.12	chr2	178487980	178973066	-	178937595	178937907	6	Bivalent	Bivalent	Bivalent	No Meth/Exp-	no change
ITGA4	ENSG00000115232.9	chr2	182321929	182400914	+	182321761	182323029	9	Bivalent	Bivalent	none	No Meth/Exp+	no change
CERKL	ENSG00000188452.9	chr2	182401403	182545392	-	182521221	182521927	9	Bivalent	Bivalent	Bivalent	No Meth/Exp+	no change
SLC40A1	ENSG00000138449.6	chr2	190425305	190448484	-	190445459	190445983	5	Bivalent	Bivalent	none	No Meth/Exp+	no change
INPP1	ENSG00000151689.8	chr2	191208196	191236391	+	191208306	191209000	2	Bivalent	Bivalent	H3K4me3	No Meth/Exp-	no change
MFSD6	ENSG00000151690.10	chr2	191273081	191373931	+	191272484	191273671	5	Bivalent	Bivalent	H3K4me3	No Meth/Exp-	no change
MYO1B	ENSG00000128641.13	chr2	192109911	192290115	+	192109828	192110940	7	H3K4me3	H3K4me3	none	Meth+/Exp+	Methylated
TMEFF2	ENSG00000144339.7	chr2	192813769	193060435	-	193058995	193060812	6	Bivalent	Bivalent	none	No Meth/Exp-	no change
HECW2	ENSG00000138411.6	chr2	197059094	197458416	-	197457392	197458522	10	Bivalent	none	H3K4me3	Meth+/Exp-	Methylable
PLCL1	ENSG00000115896.11	chr2	198669426	199437305	+	198669079	198670154	8	Bivalent	Bivalent	H3K4me3	No Meth/Exp-	no change
SEPHS1P6	ENSG00000213938.3	chr2	200524274	200525452	+	200524001	200524204	3	none	none	H3K4me3	No Meth/Exp-	no change
FTCDNL1	ENSG00000226124.2	chr2	200625267	200715896	-	200715388	200716067	4	Bivalent	none	H3K4me3	No Meth/Exp-	no change
ALS2CR11	ENSG00000155754.10	chr2	202352148	202483901	-	202483584	202483957	3	none	none	none	No Meth/Exp-	no change
FZD7	ENSG00000155760.1	chr2	202899310	202903160	+	202897386	202901046	16	H3K4me3	H3K4me3	Bivalent	Meth+/Exp+	Methylated
PLEKHM3	ENSG00000178385.9	chr2	208693027	208890284	-	208890181	208890394	4	H3K4me3	H3K4me3	H3K4me3	No Meth/Exp-	no change
LANCL1	ENSG00000115365.7	chr2	211295973	211342376	-	211341181	211341536	7	H3K4me3	H3K4me3	H3K4me3	No Meth/Exp-	no change
ERBB4	ENSG00000178568.9	chr2	212240446	213403565	-	213402180	213403867	6	Bivalent	H3K4me3	none	No Meth/Exp-	no change
AC072062.1	ENSG00000229267.2	chr2	215674953	215827998	+	215673995	215675052	8	H3K4me3	H3K4me3	H3K4me3	No Meth/Exp+	no change
FN1	ENSG00000115414.14	chr2	216225163	216300895	-	216300267	216300997	6	none	H3K4me3	none	No Meth/Exp+	no change
MARCH4	ENSG00000144583.4	chr2	217122588	217236750	-	217236025	217237129	15	Bivalent	none	Bivalent	No Meth/Exp-	no change
IGFBP2	ENSG00000115457.5	chr2	217497551	217529159	+	217497811	217498847	6	none	H3K4me3	none	No Meth/Exp+	no change
IGFBP5	ENSG00000115461.4	chr2	217536828	217560248	-	217559039	217559484	3	Bivalent	H3K4me3	none	No Meth/Exp+	no change
CYP27A1	ENSG00000135929.4	chr2	219646472	219680016	+	219646432	219647181	4	Bivalent	Bivalent	none	No Meth/Exp-	no change
AC097468.7	ENSG00000235024.1	chr2	219809351	219826625	-	219824151	219825864	11	Bivalent	Bivalent	Bivalent	No Meth/Exp-	no change
DNAJB2	ENSG00000135924.11	chr2	220143989	220151622	+	220143879	220144633	6	none	H3K4me3	H3K4me3	No Meth/Exp-	no change
RP11-316O14.1	ENSG00000268603.1	chr2	220362333	220362968	-	220361462	220363254	11	Bivalent	none	none	Meth+/Exp+	Methylated
ASIC4	ENSG00000072182.8	chr2	220378892	220403494	+	220377743	220377946	3	H3K27me3	none	none	No Meth/Exp+	no change
RP11-256I23.1	ENSG00000268896.1	chr2	220411933	220412380	-	220412341	220412678	4	none	none	none	No Meth/Exp+	no change
PAX3	ENSG00000135903.14	chr2	223064607	223163715	-	223162946	223163912	8	Bivalent	Bivalent	none	Meth+/Exp+	Methylated
KCNE4	ENSG00000152049.5	chr2	223916532	224063117	+	223917576	223918037	4	none	none	none	No Meth/Exp+	no change
C2orf82	ENSG00000182600.5	chr2	233721980	233743418	+	233740668	233741879	4	Bivalent	H3K27me3	H3K4me3	No Meth/Exp-	no change
HJURP	ENSG00000123485.7	chr2	234742062	234763212	-	234762496	234763579	12	H3K4me3	H3K4me3	H3K4me3	No Meth/Exp+	no change
GBX2	ENSG00000168505.6	chr2	237073879	237077012	-	237071794	237078762	29	Bivalent	H3K4me3	H3K27me3	Meth+/Exp+	Methylated
AC079135.1	ENSG00000233611.3	chr2	237076090	237203570	+	237071794	237078762	29	Bivalent	H3K4me3	H3K27me3	Meth+/Exp+	Methylated
IQCA1	ENSG00000132321.12	chr2	237232794	237416185	-	237416090	237416382	2	none	H3K27me3	none	No Meth/Exp-	no change
ACKR3	ENSG00000144476.5	chr2	237476430	237491001	+	237476311	237477263	5	Bivalent	none	none	No Meth/Exp+	no change
RBM44	ENSG00000177483.7	chr2	238707032	238751451	+	238707008	238708021	12	none	none	none	No Meth/Exp+	no change
AC016757.3	ENSG00000186235.6	chr2	239133193	239140318	-	239140096	239140659	11	Bivalent	none	none	Meth+/Exp-	Methylated
KIF1A	ENSG00000130294.10	chr2	241653181	241759725	-	241758141	241760783	10	none	none	H3K4me3	No Meth/Exp-	no change
BOK	ENSG00000176720.3	chr2	242498136	242513546	+	242498013	242499274	7	H3K4me3	Bivalent	H3K4me3	Meth+/Exp-	Methylable
RP11-341N2.1	ENSG00000261186.1	chr2	243029505	243030608	-	243030300	243031562	4	none	none	none	No Meth/Exp-	no change
LMCD1-AS1	ENSG00000227110.2	chr3	7994492	8653610	-	8543201	8543579	6	H3K4me3	H3K4me3	H3K4me3	No Meth/Exp-	no change
FANCD2	ENSG00000144554.6	chr3	10068098	10143614	+	10067898	10068265	4	H3K4me3	H3K4me3	H3K4me3	No Meth/Exp+	no change
TIMP4	ENSG00000157150.4	chr3	12194551	12200851	-	12200183	12200532	3	none	H3K4me3	H3K4me3	No Meth/Exp+	no change
SH3BP5	ENSG00000131370.11	chr3	15296360	15382875	-	15373314	15374209	6	Bivalent	Bivalent	H3K4me3	No Meth/Exp-	no change
KCNH8	ENSG00000183960.4	chr3	19189946	19577138	+	19189688	19190100	3	none	Bivalent	none	No Meth/Exp-	no change
SGOL1	ENSG00000129810.10	chr3	20202085	20227784	-	20227289	20227956	10	H3K4me3	none	H3K4me3	No Meth/Exp+	no change
SUSD5	ENSG00000173705.4	chr3	33191537	33260707	-	33259919	33260763	5	Bivalent	Bivalent	none	No Meth/Exp-	no change
FBXL2	ENSG00000153558.9	chr3	33318517	33445154	+	33318818	33319309	5	H3K4me3	none	H3K4me3	No Meth/Exp-	no change
CLASP2	ENSG00000163539.11	chr3	33537737	33759848	-	33759206	33759911	6	H3K4me3	none	H3K4me3	No Meth/Exp-	no change
STAC	ENSG00000144681.6	chr3	36421836	36589499	+	36421702	36422210	6	Bivalent	H3K27me3	none	No Meth/Exp+	no change
MYD88	ENSG00000172936.8	chr3	38179969	38184513	+	38179857	38180689	10	none	Bivalent	H3K4me3	No Meth/Exp+	no change
MOBP	ENSG00000168314.13	chr3	39508689	39570970	+	39543771	39544223	3	none	none	none	No Meth/Exp-	no change
MYRIP	ENSG00000170011.9	chr3	39850405	40301812	+	39851025	39851820	4	Bivalent	Bivalent	H3K4me3	No Meth/Exp-	no change
RP4-613B23.1	ENSG00000230084.1	chr3	42643455	42695880	-	42695528	42696575	5	H3K4me3	H3K4me3	H3K4me3	No Meth/Exp-	no change
KIF15	ENSG00000163808.12	chr3	44803209	44914868	+	44802852	44803618	14	H3K4me3	H3K4me3	H3K4me3	No Meth/Exp+	no change
CDCP1	ENSG00000163814.3	chr3	45123770	45187914	-	45187026	45187946	3	Bivalent	Bivalent	none	Meth+/Exp+	Methylable
LIMD1	ENSG00000144791.5	chr3	45596886	45727830	+	45635090	45635932	6	H3K4me3	H3K4me3	none	No Meth/Exp+	no change
SLC6A20	ENSG00000163817.11	chr3	45796942	45838027	-	45837480	45838256	9	Bivalent	Bivalent	none	No Meth/Exp-	no change
LTF	ENSG00000012223.8	chr3	46477136	46526724	-	46506161	46506416	4	none	none	H3K27me3	No Meth/Exp+	no change
TDGF1	ENSG00000241186.3	chr3	46616045	46668033	+	46618307	46618669	3	none	H3K27me3	none	No Meth/Exp-	no change
CDC25A	ENSG00000164045.7	chr3	48198636	48229892	-	48229077	48230285	5	H3K4me3	H3K4me3	H3K4me3	No Meth/Exp+	no change
LAMB2	ENSG00000172037.9	chr3	49158547	49170551	-	49157768	49158463	8	H3K4me3	H3K4me3	H3K4me3	No Meth/Exp+	no change
TRAIP	ENSG00000183763.4	chr3	49866034	49894007	-	49893810	49894216	9	H3K4me3	H3K4me3	H3K4me3	No Meth/Exp+	no change
SEMA3F	ENSG00000001617.7	chr3	50192478	50226508	+	50191971	50193130	6	Bivalent	Bivalent	none	No Meth/Exp+	no change
CISH	ENSG00000114737.11	chr3	50643921	50649262	-	50648939	50649829	9	none	none	H3K4me3	No Meth/Exp+	no change
DOCK3	ENSG00000088538.12	chr3	50712672	51421629	+	50712068	50713007	4	Bivalent	Bivalent	H3K4me3	No Meth/Exp-	no change
GPR62	ENSG00000180929.4	chr3	51989330	51991509	+	51989763	51990639	4	Bivalent	none	H3K4me3	No Meth/Exp-	no change
STAB1	ENSG00000010327.6	chr3	52529354	52558511	+	52552722	52553384	2	none	none	none	No Meth/Exp+	no change
CACNA2D3	ENSG00000157445.10	chr3	54156574	55108584	+	54155239	54157025	6	Bivalent	H3K27me3	Bivalent	No Meth/Exp-	no change
RP11-157F20.3	ENSG00000272202.1	chr3	57112971	57114129	+	57112567	57113908	6	Bivalent	Bivalent	none	No Meth/Exp+	no change
ABHD6	ENSG00000163686.9	chr3	58223233	58281420	+	58223101	58224364	6	Bivalent	Bivalent	H3K4me3	No Meth/Exp-	no change
PXK	ENSG00000168297.11	chr3	58318607	58411748	+	58318398	58319192	6	none	H3K4me3	H3K4me3	No Meth/Exp-	no change
C3orf67	ENSG00000163689.14	chr3	58703092	59035810	-	59035406	59035944	5	none	H3K4me3	H3K4me3	Meth+/Exp-	Methylable
ADAMTS9	ENSG00000163638.9	chr3	64501333	64673676	-	64671087	64673957	15	Bivalent	H3K4me3	Bivalent	No Meth/Exp+	no change
FAM19A4	ENSG00000163377.10	chr3	68780917	68981761	-	68980783	68982035	10	Bivalent	Bivalent	none	Meth+/Exp-	Methylable
RP11-154H23.3	ENSG00000270562.1	chr3	71634094	71636560	+	71630573	71633217	10	Bivalent	H3K4me3	H3K4me3	No Meth/Exp-	no change
RYBP	ENSG00000163602.9	chr3	72420976	72496069	-	72495853	72496852	8	H3K4me3	none	H3K4me3	No Meth/Exp-	no change
PROS1	ENSG00000184500.10	chr3	93591881	93692910	-	93692554	93692783	3	Bivalent	H3K4me3	H3K4me3	No Meth/Exp+	no change
EPHA6	ENSG00000080224.13	chr3	96533425	97471304	+	96532023	96533625	11	Bivalent	Bivalent	H3K4me3	Meth+/Exp-	Methylated
CLDND1	ENSG00000080822.12	chr3	98216756	98241910	-	98241409	98241711	6	H3K4me3	H3K4me3	H3K4me3	No Meth/Exp-	no change
CPOX	ENSG00000080819.2	chr3	98239976	98312567	-	98311909	98312696	10	none	H3K4me3	H3K4me3	No Meth/Exp-	no change
FILIP1L	ENSG00000168386.14	chr3	99548985	99833357	-	99594969	99595215	3	Bivalent	H3K4me3	H3K4me3	No Meth/Exp+	no change
NXPE3	ENSG00000144815.10	chr3	101498046	101547073	+	101497830	101498648	11	none	H3K4me3	H3K4me3	No Meth/Exp-	no change
ALCAM	ENSG00000170017.8	chr3	105085753	105295744	+	105085990	105086223	3	Bivalent	none	none	No Meth/Exp-	no change
LINC00882	ENSG00000242759.2	chr3	106555658	106959488	-	106959409	106959925	9	none	none	H3K4me3	No Meth/Exp-	no change
CD47	ENSG00000196776.10	chr3	107762145	107809872	-	107809375	107810543	9	Bivalent	H3K4me3	H3K4me3	Meth+/Exp-	Methylated
KIAA1524	ENSG00000163507.9	chr3	108268716	108308491	-	108308227	108308604	11	H3K4me3	H3K4me3	H3K4me3	No Meth/Exp+	no change
MORC1	ENSG00000114487.5	chr3	108677086	108836989	-	108836795	108837089	7	none	none	none	No Meth/Exp-	no change
CD200	ENSG00000091972.14	chr3	112051194	112081659	+	112051893	112052406	5	H3K4me3	H3K4me3	H3K4me3	No Meth/Exp-	no change
SIDT1	ENSG00000072858.6	chr3	113251143	113348425	+	113251699	113252290	5	Bivalent	Bivalent	Bivalent	No Meth/Exp-	no change
ARHGAP31-AS1	ENSG00000241155.1	chr3	119033140	119041607	-	119041382	119042255	4	none	H3K4me3	H3K4me3	No Meth/Exp+	no change
FSTL1	ENSG00000163430.5	chr3	120111140	120170100	-	120169202	120170519	6	H3K4me3	H3K4me3	H3K4me3	No Meth/Exp+	no change
POLQ	ENSG00000051341.9	chr3	121150278	121264853	-	121264469	121264943	9	H3K4me3	H3K4me3	H3K4me3	No Meth/Exp+	no change
PARP9	ENSG00000138496.12	chr3	122246771	122283424	-	122283002	122283594	12	none	H3K4me3	H3K4me3	No Meth/Exp+	no change
DTX3L	ENSG00000163840.5	chr3	122283085	122294050	+	122283002	122283594	12	none	H3K4me3	H3K4me3	No Meth/Exp+	no change
PDIA5	ENSG00000065485.13	chr3	122785909	122944074	+	122785734	122786600	8	none	H3K4me3	H3K4me3	No Meth/Exp+	no change
ADCY5	ENSG00000173175.10	chr3	123001143	123168605	-	123166218	123168567	11	Bivalent	Bivalent	H3K4me3	Meth+/Exp-	Methylable
MYLK	ENSG00000065534.14	chr3	123328896	123603178	-	123602588	123603540	8	Bivalent	none	none	Meth+/Exp-	Methylable
TF	ENSG00000091513.10	chr3	133464800	133497850	+	133464949	133465420	3	none	H3K27me3	none	No Meth/Exp-	no change
RAB6B	ENSG00000154917.6	chr3	133543083	133614680	-	133613566	133615174	12	Bivalent	Bivalent	H3K4me3	No Meth/Exp-	no change
PPP2R3A	ENSG00000073711.6	chr3	135684515	135866733	+	135684570	135685367	4	H3K4me3	H3K4me3	H3K4me3	No Meth/Exp-	no change
DZIP1L	ENSG00000158163.10	chr3	137780832	137834660	-	137833848	137834592	8	H3K4me3	H3K4me3	H3K4me3	No Meth/Exp+	no change
ESYT3	ENSG00000158220.9	chr3	138153428	138200528	+	138153269	138154621	8	Bivalent	Bivalent	none	No Meth/Exp-	no change
RP11-548O1.3	ENSG00000244578.1	chr3	138654031	138662862	-	138663718	138666346	14	Bivalent	Bivalent	none	Meth+/Exp+	Methylable
FOXL2	ENSG00000183770.5	chr3	138663066	138665982	-	138663718	138666346	14	Bivalent	Bivalent	none	Meth+/Exp+	Methylable
C3orf72	ENSG00000206262.4	chr3	138666076	138672293	+	138663718	138666346	14	Bivalent	Bivalent	none	Meth+/Exp+	Methylable
CLSTN2	ENSG00000158258.11	chr3	139654027	140296239	+	139653430	139655115	9	Bivalent	Bivalent	none	No Meth/Exp-	no change
PCOLCE2	ENSG00000163710.3	chr3	142534764	142608045	-	142607195	142608229	13	Bivalent	Bivalent	Bivalent	No Meth/Exp+	no change
C3orf58	ENSG00000181744.4	chr3	143690640	143767561	+	143689733	143692279	19	H3K4me3	H3K4me3	H3K4me3	No Meth/Exp-	no change
PLOD2	ENSG00000152952.7	chr3	145787227	145881440	-	145878430	145879287	6	H3K4me3	none	H3K4me3	No Meth/Exp+	no change
PLSCR2	ENSG00000163746.7	chr3	146109208	146213778	-	146187108	146187710	2	none	none	H3K4me3	No Meth/Exp+	no change
PLSCR1	ENSG00000188313.8	chr3	146232967	146262651	-	146262126	146262505	3	H3K4me3	H3K4me3	H3K4me3	No Meth/Exp+	no change
AGTR1	ENSG00000144891.13	chr3	148415571	148460795	+	148415442	148415932	5	Bivalent	Bivalent	Bivalent	No Meth/Exp+	no change
WWTR1	ENSG00000018408.10	chr3	149235022	149454501	-	149374709	149376300	16	H3K4me3	H3K4me3	Bivalent	No Meth/Exp+	no change
WWTR1-AS1	ENSG00000241313.2	chr3	149374807	149379151	+	149374709	149376300	16	H3K4me3	H3K4me3	Bivalent	No Meth/Exp+	no change
RNF13	ENSG00000082996.15	chr3	149530495	149679926	+	149530293	149531234	7	H3K4me3	H3K4me3	H3K4me3	No Meth/Exp-	no change
KCNAB1	ENSG00000169282.13	chr3	155755490	156256545	+	156008991	156009320	3	Bivalent	Bivalent	none	No Meth/Exp-	no change
VEPH1	ENSG00000197415.7	chr3	156977531	157251408	-	157155267	157155826	4	Bivalent	H3K4me3	none	No Meth/Exp+	no change
PTX3	ENSG00000163661.3	chr3	157154578	157161417	+	157155267	157155826	4	Bivalent	H3K4me3	none	No Meth/Exp+	no change
SHOX2	ENSG00000168779.15	chr3	157814948	157824292	-	157822973	157823836	6	Bivalent	Bivalent	none	No Meth/Exp+	no change
IQCJ-SCHIP1	ENSG00000250588.2	chr3	158680024	159615155	+	159480946	159483023	8	H3K4me3	Bivalent	H3K4me3	No Meth/Exp-	no change
TRIM59	ENSG00000213186.3	chr3	160150233	160203561	-	160167184	160168200	14	H3K4me3	Bivalent	Bivalent	Meth+/Exp-	Methylated
ZBBX	ENSG00000169064.8	chr3	166958075	167099134	-	167097927	167098198	8	H3K4me3	H3K4me3	H3K4me3	No Meth/Exp-	no change
SERPINI1	ENSG00000163536.8	chr3	167453031	167543356	+	167452376	167452830	8	H3K4me3	none	H3K4me3	No Meth/Exp-	no change
EGFEM1P	ENSG00000206120.7	chr3	167967310	168548387	+	167967246	167968130	5	Bivalent	H3K4me3	none	No Meth/Exp+	no change
RP11-379K17.4	ENSG00000239219.2	chr3	169657141	169684522	-	169684394	169685006	8	H3K4me3	H3K4me3	H3K4me3	No Meth/Exp-	no change
CLDN11	ENSG00000013297.6	chr3	170136653	170578169	+	170136242	170137886	14	Bivalent	none	none	Meth+/Exp-	Methylable
PLD1	ENSG00000075651.11	chr3	171318195	171528740	-	171527617	171528458	3	Bivalent	Bivalent	H3K4me3	No Meth/Exp-	no change
PP13439	ENSG00000183657.2	chr3	171509580	171527714	-	171527617	171528458	3	Bivalent	Bivalent	H3K4me3	No Meth/Exp-	no change
FNDC3B	ENSG00000075420.8	chr3	171757418	172119455	+	171757493	171758724	7	H3K4me3	H3K4me3	H3K4me3	No Meth/Exp+	no change
ECT2	ENSG00000114346.9	chr3	172468472	172539264	+	172468372	172468845	3	H3K4me3	H3K4me3	H3K4me3	No Meth/Exp+	no change
PEX5L	ENSG00000114757.14	chr3	179512746	179754841	-	179754520	179755245	9	Bivalent	Bivalent	H3K4me3	No Meth/Exp-	no change
LAMP3	ENSG00000078081.3	chr3	182840001	182881627	-	182880277	182880722	5	Bivalent	none	none	Meth+/Exp+	Methylable
MAP6D1	ENSG00000180834.3	chr3	183533664	183543382	-	183542496	183543804	6	H3K4me3	H3K4me3	H3K4me3	No Meth/Exp-	no change
IGF2BP2	ENSG00000073792.11	chr3	185361527	185542844	-	185541048	185544146	14	H3K4me3	H3K4me3	Bivalent	No Meth/Exp+	no change
TPRG1	ENSG00000188001.5	chr3	188665003	189043093	+	188665275	188665552	3	none	H3K4me3	H3K4me3	No Meth/Exp+	no change
LEPREL1-AS1	ENSG00000225764.1	chr3	189838753	189862635	+	189838080	189838879	5	none	H3K4me3	H3K4me3	No Meth/Exp-	no change
CLDN16	ENSG00000113946.3	chr3	190040330	190129932	+	190039817	190040465	6	Bivalent	Bivalent	H3K4me3	No Meth/Exp-	no change
GMNC	ENSG00000205835.4	chr3	190570666	190610218	-	190580504	190580899	5	Bivalent	Bivalent	H3K4me3	Meth+/Exp-	Methylable
FGF12	ENSG00000114279.9	chr3	191857184	192485553	-	192125821	192127994	15	Bivalent	none	none	No Meth/Exp-	no change
HES1	ENSG00000114315.3	chr3	193853934	193856521	+	193854575	193856015	5	Bivalent	H3K4me3	none	No Meth/Exp+	no change
ANKRD18DP	ENSG00000226435.6	chr3	197780393	197807591	-	197807029	197808734	8	Bivalent	Bivalent	none	Meth+/Exp-	Methylable
TACC3	ENSG00000013810.14	chr4	1723227	1746898	+	1722179	1723850	7	H3K4me3	H3K4me3	H3K4me3	No Meth/Exp+	no change
STK32B	ENSG00000152953.8	chr4	5053169	5502725	+	5053230	5054092	6	Bivalent	Bivalent	none	No Meth/Exp+	no change
EVC2	ENSG00000173040.8	chr4	5544499	5711275	-	5709985	5710495	8	Bivalent	none	Bivalent	No Meth/Exp+	no change
EVC	ENSG00000072840.8	chr4	5712924	5830772	+	5713035	5713451	2	none	none	none	No Meth/Exp+	no change
SORCS2	ENSG00000184985.12	chr4	7194265	7744554	+	7194537	7195467	4	Bivalent	H3K27me3	H3K4me3	No Meth/Exp-	no change
ABLIM2	ENSG00000163995.14	chr4	7967039	8160559	-	8159728	8160893	11	Bivalent	none	H3K4me3	No Meth/Exp-	no change
HTRA3	ENSG00000170801.5	chr4	8271492	8308838	+	8271214	8272091	7	none	H3K27me3	none	No Meth/Exp+	no change
NKX3-2	ENSG00000109705.7	chr4	13542454	13546674	-	13543562	13546494	17	Bivalent	Bivalent	H3K27me3	Meth+/Exp+	Methylated
QDPR	ENSG00000151552.7	chr4	17461884	17513857	-	17513309	17513981	7	none	none	H3K4me3	No Meth/Exp-	no change
NCAPG	ENSG00000109805.5	chr4	17812525	17846485	+	17811954	17813227	11	H3K4me3	H3K4me3	H3K4me3	No Meth/Exp+	no change
SLIT2	ENSG00000145147.15	chr4	20254883	20622184	+	20253276	20256868	16	Bivalent	H3K4me3	Bivalent	Meth+/Exp-	Methylable
SLC34A2	ENSG00000157765.7	chr4	25656923	25680370	+	25657119	25657547	5	Bivalent	H3K27me3	H3K27me3	Meth+/Exp+	Methylable
ARAP2	ENSG00000047365.7	chr4	35949843	36246131	-	36245631	36246389	4	Bivalent	Bivalent	H3K4me3	No Meth/Exp-	no change
N4BP2	ENSG00000078177.9	chr4	40058446	40159872	+	40057484	40059041	15	H3K4me3	H3K4me3	H3K4me3	No Meth/Exp+	no change
LIMCH1	ENSG00000064042.13	chr4	41361624	41702061	+	41362252	41363639	5	Bivalent	none	H3K4me3	No Meth/Exp-	no change
SHISA3	ENSG00000178343.4	chr4	42399856	42404504	+	42399152	42400802	11	Bivalent	none	Bivalent	No Meth/Exp+	no change
ATP8A1	ENSG00000124406.12	chr4	42410390	42659122	-	42658278	42659550	7	Bivalent	Bivalent	H3K4me3	No Meth/Exp-	no change
KCTD8	ENSG00000183783.6	chr4	44175926	44450824	-	44449386	44451133	12	Bivalent	Bivalent	none	No Meth/Exp-	no change
GABRA2	ENSG00000151834.11	chr4	46250444	46477247	-	46391903	46392572	6	Bivalent	Bivalent	H3K4me3	No Meth/Exp-	no change
ZAR1	ENSG00000182223.7	chr4	48492269	48496406	+	48492117	48493589	10	Bivalent	none	none	Meth+/Exp+	Methylated
FRYL	ENSG00000075539.9	chr4	48499378	48782339	-	48781331	48782339	6	H3K4me3	H3K4me3	H3K4me3	No Meth/Exp-	no change
KDR	ENSG00000128052.8	chr4	55944644	55991756	-	55991402	55992171	10	Bivalent	Bivalent	Bivalent	Meth+/Exp+	Methylable
CXCL1	ENSG00000163739.4	chr4	74735110	74736959	+	74734918	74735544	7	Bivalent	H3K27me3	Bivalent	Meth+/Exp+	Methylated
CXCL3	ENSG00000163734.4	chr4	74902306	74904524	-	74903953	74904589	6	Bivalent	H3K4me3	H3K4me3	No Meth/Exp+	no change
CXCL2	ENSG00000081041.8	chr4	74962752	74965010	-	74964656	74965279	9	Bivalent	none	H3K4me3	No Meth/Exp+	no change
CDKL2	ENSG00000138769.6	chr4	76503215	76555900	-	76555366	76556079	11	none	H3K4me3	H3K4me3	Meth+/Exp-	Methylated
ANXA3	ENSG00000138772.8	chr4	79472673	79531597	+	79472806	79473177	3	none	Bivalent	Bivalent	Meth+/Exp-	Methylable
RP11-377G16.2	ENSG00000248719.1	chr4	81104434	81111323	-	81109887	81110460	3	none	none	none	Meth+/Exp-	Methylated
C4orf22	ENSG00000197826.7	chr4	81256874	81884910	+	81257040	81257270	3	Bivalent	none	Bivalent	Meth+/Exp-	Methylable
PLAC8	ENSG00000145287.6	chr4	84011201	84058228	-	84030630	84031309	9	none	Bivalent	H3K4me3	No Meth/Exp+	no change
NKX6-1	ENSG00000163623.5	chr4	85413140	85419603	-	85417659	85420799	18	Bivalent	Bivalent	Bivalent	Meth+/Exp+	Methylated
PPM1K	ENSG00000163644.10	chr4	89178772	89205921	-	89204952	89206069	10	none	H3K4me3	H3K4me3	No Meth/Exp-	no change
SNCA	ENSG00000145335.11	chr4	90645250	90759466	-	90758008	90758870	10	Bivalent	H3K4me3	H3K4me3	Meth+/Exp-	Methylable
RP11-67M1.1	ENSG00000247775.2	chr4	90757559	90763129	+	90758008	90758870	10	Bivalent	H3K4me3	H3K4me3	Meth+/Exp-	Methylable
CCSER1	ENSG00000184305.10	chr4	91048686	92523064	+	91048411	91049682	10	Bivalent	Bivalent	H3K4me3	Meth+/Exp-	Methylated
STPG2	ENSG00000163116.5	chr4	98105244	99064391	-	99064602	99064805	2	H3K4me3	H3K4me3	H3K4me3	No Meth/Exp-	no change
RAP1GDS1	ENSG00000138698.10	chr4	99182535	99365012	+	99181509	99183199	8	H3K4me3	H3K4me3	H3K4me3	No Meth/Exp-	no change
RP11-1299A16.3	ENSG00000260641.1	chr4	99580055	99585701	+	99579142	99580160	5	Bivalent	none	H3K4me3	No Meth/Exp-	no change
CENPE	ENSG00000138778.7	chr4	104026963	104119566	-	104119319	104119663	8	H3K4me3	H3K4me3	H3K4me3	No Meth/Exp+	no change
TACR3	ENSG00000169836.4	chr4	104507188	104640973	-	104640559	104640797	3	Bivalent	none	none	Meth+/Exp-	Methylable
AC004053.1	ENSG00000245384.1	chr4	105412122	105618749	+	105412655	105412942	3	none	H3K4me3	H3K4me3	No Meth/Exp-	no change
NPNT	ENSG00000168743.8	chr4	106815932	106925184	+	106816415	106817769	6	Bivalent	Bivalent	Bivalent	No Meth/Exp+	no change
RP11-286E11.1	ENSG00000245293.2	chr4	108784635	108899955	-	108852495	108853387	9	Bivalent	none	H3K4me3	No Meth/Exp-	no change
LEF1	ENSG00000138795.5	chr4	108968701	109090112	-	109087747	109090407	10	Bivalent	none	Bivalent	No Meth/Exp+	no change
ETNPPL	ENSG00000164089.4	chr4	109663196	109684210	-	109683729	109684362	6	Bivalent	Bivalent	Bivalent	No Meth/Exp-	no change
CCDC109B	ENSG00000005059.11	chr4	110481361	110609874	+	110480827	110482060	9	none	H3K4me3	H3K4me3	No Meth/Exp+	no change
CASP6	ENSG00000138794.5	chr4	110609785	110624739	-	110623959	110624831	7	H3K4me3	H3K4me3	H3K4me3	No Meth/Exp+	no change
ENPEP	ENSG00000138792.5	chr4	111286889	111486441	+	111397677	111398089	4	none	none	H3K4me3	No Meth/Exp+	no change
C4orf32	ENSG00000174749.5	chr4	113066553	113116412	+	113066470	113067379	7	Bivalent	Bivalent	H3K4me3	Meth+/Exp-	Methylable
RP11-402J6.1	ENSG00000249509.1	chr4	113436541	113468037	+	113435898	113438002	11	Bivalent	Bivalent	Bivalent	No Meth/Exp-	no change
ARSJ	ENSG00000180801.11	chr4	114821440	114900883	-	114900355	114900810	3	Bivalent	Bivalent	Bivalent	No Meth/Exp+	no change
UGT8	ENSG00000174607.6	chr4	115519611	115599380	+	115519422	115520932	10	Bivalent	Bivalent	Bivalent	No Meth/Exp-	no change
TRAM1L1	ENSG00000174599.4	chr4	118004718	118006736	-	118006538	118006859	7	H3K4me3	H3K4me3	H3K4me3	Meth+/Exp-	Methylable
PDE5A	ENSG00000138735.11	chr4	120415550	120550146	-	120548203	120550250	12	none	none	H3K4me3	No Meth/Exp+	no change
MAD2L1	ENSG00000164109.9	chr4	120976763	120988229	-	120987617	120988156	5	H3K4me3	H3K4me3	H3K4me3	No Meth/Exp+	no change
QRFPR	ENSG00000186867.6	chr4	122250467	122302214	-	122301567	122302290	10	Bivalent	Bivalent	Bivalent	Meth+/Exp-	Methylable
CCNA2	ENSG00000145386.5	chr4	122737599	122745087	-	122744557	122745267	9	H3K4me3	H3K4me3	H3K4me3	No Meth/Exp+	no change
SPRY1	ENSG00000164056.6	chr4	124317950	124324910	+	124318307	124319998	9	H3K4me3	H3K4me3	none	No Meth/Exp+	no change
FAT4	ENSG00000196159.7	chr4	126237554	126414087	+	126235895	126238930	19	Bivalent	H3K4me3	Bivalent	No Meth/Exp-	no change
PLK4	ENSG00000142731.6	chr4	128802016	128820350	+	128801886	128802696	9	H3K4me3	H3K4me3	H3K4me3	No Meth/Exp+	no change
RP11-745L13.2	ENSG00000251555.1	chr4	132851186	132897107	-	132896360	132896778	4	none	none	none	No Meth/Exp-	no change
RP11-9G1.3	ENSG00000250241.1	chr4	133996466	134070271	-	134069162	134070442	14	Bivalent	none	H3K4me3	No Meth/Exp-	no change
SCOC	ENSG00000153130.13	chr4	141178440	141306880	+	141294666	141295274	7	H3K4me3	H3K4me3	H3K4me3	No Meth/Exp-	no change
RP11-425I13.3	ENSG00000196951.6	chr4	141204878	141294535	-	141294666	141295274	7	H3K4me3	H3K4me3	H3K4me3	No Meth/Exp-	no change
HHIP	ENSG00000164161.5	chr4	145567173	145666423	+	145566242	145567413	7	Bivalent	H3K4me3	none	Meth+/Exp-	Methylable
EDNRA	ENSG00000151617.11	chr4	148402069	148466106	+	148402198	148402760	4	Bivalent	none	Bivalent	No Meth/Exp+	no change
FHDC1	ENSG00000137460.4	chr4	153857504	153900848	+	153857112	153859245	6	Bivalent	Bivalent	H3K4me3	No Meth/Exp+	no change
TRIM2	ENSG00000109654.10	chr4	154073494	154260472	+	154074383	154075045	3	Bivalent	H3K4me3	H3K4me3	No Meth/Exp-	no change
DCHS2	ENSG00000197410.8	chr4	155153399	155412930	-	155410623	155413393	9	Bivalent	Bivalent	Bivalent	Meth+/Exp-	Methylated
GUCY1B3	ENSG00000061918.8	chr4	156680144	156728743	+	156680095	156681386	7	Bivalent	none	H3K4me3	No Meth/Exp-	no change
PDGFC	ENSG00000145431.6	chr4	157681606	157892546	-	157892685	157893286	4	none	H3K4me3	H3K4me3	No Meth/Exp+	no change
TMEM144	ENSG00000164124.6	chr4	159122756	159176563	+	159131508	159131736	3	H3K4me3	H3K4me3	H3K4me3	No Meth/Exp-	no change
KLHL2	ENSG00000109466.9	chr4	166128770	166244308	+	166128385	166129255	4	Bivalent	H3K4me3	H3K4me3	No Meth/Exp-	no change
TLL1	ENSG00000038295.3	chr4	166794410	167025047	+	166794545	166795341	5	Bivalent	Bivalent	none	No Meth/Exp-	no change
SPOCK3	ENSG00000196104.6	chr4	167654535	168155947	-	168155005	168155765	6	Bivalent	Bivalent	none	Meth+/Exp-	Methylable
GALNTL6	ENSG00000174473.11	chr4	172733405	173962710	+	172733734	172735118	11	Bivalent	Bivalent	Bivalent	Meth+/Exp-	Methylable
HPGD	ENSG00000164120.9	chr4	175411328	175444305	-	175443406	175443837	4	Bivalent	Bivalent	Bivalent	No Meth/Exp-	no change
NEIL3	ENSG00000109674.3	chr4	178230990	178284097	+	178230850	178231260	10	H3K4me3	H3K4me3	H3K4me3	No Meth/Exp+	no change
STOX2	ENSG00000173320.5	chr4	184774584	184944679	+	184826253	184828177	11	Bivalent	H3K4me3	H3K4me3	No Meth/Exp-	no change
MLF1IP	ENSG00000151725.7	chr4	185615772	185655287	-	185654505	185655515	13	H3K4me3	H3K4me3	H3K4me3	No Meth/Exp+	no change
ACSL1	ENSG00000151726.9	chr4	185676749	185747972	-	185746557	185747827	11	Bivalent	Bivalent	H3K4me3	Meth+/Exp-	Methylable
CCDC110	ENSG00000168491.5	chr4	186366336	186392913	-	186392574	186393184	2	none	none	H3K4me3	No Meth/Exp-	no change
TPPP	ENSG00000171368.10	chr5	660883	693510	-	692681	694377	6	none	H3K4me3	H3K4me3	No Meth/Exp-	no change
TRIP13	ENSG00000071539.9	chr5	892758	919472	+	892522	893479	16	H3K4me3	H3K4me3	H3K4me3	No Meth/Exp+	no change
ADCY2	ENSG00000078295.11	chr5	7396321	7830194	+	7394986	7397022	6	none	H3K4me3	none	No Meth/Exp-	no change
RP11-19O2.2	ENSG00000250448.1	chr5	16180347	16185694	+	16179064	16180420	17	Bivalent	none	none	Meth+/Exp-	Methylated
CDH6	ENSG00000113361.8	chr5	31193857	31329253	+	31193952	31194419	5	Bivalent	Bivalent	Bivalent	No Meth/Exp+	no change
CTD-2517O10.6	ENSG00000272323.1	chr5	34837654	34839383	-	34838921	34839624	8	H3K4me3	H3K4me3	H3K4me3	No Meth/Exp-	no change
EGFLAM	ENSG00000164318.13	chr5	38258511	38465123	+	38257825	38259136	12	Bivalent	Bivalent	Bivalent	No Meth/Exp+	no change
CTD-2127H9.1	ENSG00000249740.1	chr5	38736157	38845931	-	38845502	38846476	5	Bivalent	Bivalent	Bivalent	No Meth/Exp+	no change
OSMR	ENSG00000145623.8	chr5	38845960	38945698	+	38845502	38846476	5	Bivalent	Bivalent	Bivalent	No Meth/Exp+	no change
C9	ENSG00000113600.6	chr5	39284364	39424970	-	39424892	39425320	3	none	H3K4me3	H3K4me3	No Meth/Exp+	no change
DAB2	ENSG00000153071.10	chr5	39371780	39462402	-	39424892	39425320	3	none	H3K4me3	H3K4me3	No Meth/Exp+	no change
ITGA1	ENSG00000213949.4	chr5	52083730	52255040	+	52083946	52084287	6	none	Bivalent	none	No Meth/Exp+	no change
CTD-2175A23.1	ENSG00000249899.1	chr5	52228249	52286108	-	52284715	52285489	6	Bivalent	Bivalent	Bivalent	No Meth/Exp-	no change
DEPDC1B	ENSG00000035499.8	chr5	59892739	59996017	-	59995374	59996331	11	H3K4me3	H3K4me3	H3K4me3	No Meth/Exp+	no change
ELOVL7	ENSG00000164181.9	chr5	60047618	60140216	-	60139359	60140155	5	Bivalent	Bivalent	H3K4me3	No Meth/Exp-	no change
HTR1A	ENSG00000178394.3	chr5	63256183	63258334	-	63256548	63257886	12	Bivalent	H3K27me3	Bivalent	Meth+/Exp-	Methylable
CENPK	ENSG00000123219.8	chr5	64813593	64858998	-	64858775	64859283	9	H3K4me3	H3K4me3	H3K4me3	No Meth/Exp+	no change
CCNB1	ENSG00000134057.10	chr5	68462837	68474072	+	68462675	68463214	7	H3K4me3	H3K4me3	H3K4me3	No Meth/Exp+	no change
CENPH	ENSG00000153044.5	chr5	68485375	68506184	+	68485215	68485577	4	H3K4me3	H3K4me3	H3K4me3	No Meth/Exp+	no change
CTD-2377O17.1	ENSG00000271714.1	chr5	74161718	74163679	+	74161536	74162716	6	H3K4me3	H3K4me3	H3K4me3	No Meth/Exp-	no change
ANKRD31	ENSG00000145700.5	chr5	74364100	74532703	-	74532626	74532899	5	H3K4me3	H3K4me3	H3K4me3	No Meth/Exp-	no change
IQGAP2	ENSG00000145703.11	chr5	75699074	76003957	+	75698759	75700160	4	H3K4me3	H3K4me3	none	No Meth/Exp+	no change
CTD-2384B11.2	ENSG00000225407.3	chr5	75987264	76012040	-	76011120	76012292	10	Bivalent	H3K4me3	none	No Meth/Exp+	no change
F2R	ENSG00000181104.6	chr5	76011868	76031606	+	76011120	76012292	10	Bivalent	H3K4me3	none	No Meth/Exp+	no change
CRHBP	ENSG00000145708.6	chr5	76248538	76276983	+	76249435	76250528	6	Bivalent	none	Bivalent	Meth+/Exp-	Methylated
CTC-459I6.1	ENSG00000251450.1	chr5	80243516	80256726	-	80255904	80257006	8	Bivalent	none	none	Meth+/Exp-	Methylable
RASGRF2	ENSG00000113319.7	chr5	80256491	80525975	+	80255904	80257006	8	Bivalent	none	none	Meth+/Exp-	Methylable
ACOT12	ENSG00000172497.4	chr5	80625824	80689998	-	80689818	80690228	3	Bivalent	none	none	No Meth/Exp+	no change
EDIL3	ENSG00000164176.8	chr5	83236373	83680611	-	83679584	83680720	8	Bivalent	Bivalent	H3K4me3	No Meth/Exp-	no change
CTD-2269F5.1	ENSG00000250320.1	chr5	83680245	83786583	+	83679584	83680720	8	Bivalent	Bivalent	H3K4me3	No Meth/Exp-	no change
CTD-2260A17.2	ENSG00000247121.2	chr5	96149731	96271513	-	96270437	96272125	14	Bivalent	H3K4me3	H3K4me3	No Meth/Exp-	no change
C5orf30	ENSG00000181751.5	chr5	102594403	102614361	+	102594435	102595550	5	H3K4me3	H3K4me3	H3K4me3	No Meth/Exp-	no change
CTC-332L22.1	ENSG00000271849.1	chr5	109023503	109024030	-	109024965	109026701	9	H3K4me3	H3K4me3	H3K4me3	No Meth/Exp-	no change
MAN2A1	ENSG00000112893.5	chr5	109025067	109205326	+	109024965	109026701	9	H3K4me3	H3K4me3	H3K4me3	No Meth/Exp-	no change
CAMK4	ENSG00000152495.6	chr5	110559351	110830584	+	110559569	110560446	5	Bivalent	H3K4me3	H3K4me3	No Meth/Exp-	no change
LOX	ENSG00000113083.8	chr5	121398890	121413980	-	121412500	121414077	10	Bivalent	Bivalent	none	No Meth/Exp+	no change
PPIC	ENSG00000168938.5	chr5	122358945	122372436	-	122371569	122372822	8	Bivalent	Bivalent	none	No Meth/Exp+	no change
RP11-434D11.4	ENSG00000251072.2	chr5	126087655	126112178	-	126112229	126114229	11	H3K4me3	H3K4me3	H3K4me3	No Meth/Exp+	no change
LMNB1	ENSG00000113368.7	chr5	126112315	126172712	+	126112229	126114229	11	H3K4me3	H3K4me3	H3K4me3	No Meth/Exp+	no change
MEGF10	ENSG00000145794.12	chr5	126626523	126801429	+	126626053	126626901	9	none	H3K4me3	none	No Meth/Exp-	no change
SLC12A2	ENSG00000064651.9	chr5	127419458	127525380	+	127418594	127420512	12	Bivalent	H3K4me3	H3K4me3	No Meth/Exp-	no change
ACSL6	ENSG00000164398.8	chr5	131142683	131347936	-	131346892	131347776	9	Bivalent	Bivalent	H3K4me3	No Meth/Exp-	no change
IRF1	ENSG00000125347.9	chr5	131817301	131826490	-	131825842	131826935	7	Bivalent	none	H3K4me3	No Meth/Exp+	no change
CCNI2	ENSG00000205089.3	chr5	132083137	132089856	+	132082873	132083911	5	Bivalent	none	H3K4me3	No Meth/Exp-	no change
2008-09-01	ENSG00000164402.9	chr5	132086509	132142933	-	132112448	132113621	11	Bivalent	none	H3K4me3	Meth+/Exp-	Methylable
SOWAHA	ENSG00000198944.4	chr5	132149033	132152488	+	132148854	132150918	11	Bivalent	H3K27me3	H3K4me3	Meth+/Exp-	Methylated
FSTL4	ENSG00000053108.12	chr5	132532147	132948255	-	132946744	132948467	10	Bivalent	none	Bivalent	No Meth/Exp-	no change
PHF15	ENSG00000043143.16	chr5	133860003	133918918	+	133859942	133863428	14	H3K4me3	Bivalent	H3K4me3	No Meth/Exp-	no change
CTC-203F4.2	ENSG00000270021.1	chr5	134734970	134736986	+	134734096	134735261	10	Bivalent	none	H3K4me3	No Meth/Exp-	no change
SLC25A48	ENSG00000145832.8	chr5	135170338	135224326	+	135170271	135171156	7	Bivalent	none	Bivalent	No Meth/Exp-	no change
TGFBI	ENSG00000120708.12	chr5	135364584	135399507	+	135364507	135365036	9	Bivalent	H3K27me3	H3K27me3	Meth+/Exp+	Methylable
AC009014.3	ENSG00000271824.1	chr5	135527156	135528822	-	135527056	135528978	5	Bivalent	Bivalent	none	No Meth/Exp-	no change
SPOCK1	ENSG00000152377.8	chr5	136310987	136934068	-	136834016	136835146	9	Bivalent	none	none	Meth+/Exp-	Methylable
RP11-381K20.2	ENSG00000250159.2	chr5	137150022	137225025	-	137224986	137225477	4	none	none	H3K4me3	Meth+/Exp-	Methylable
KIF20A	ENSG00000112984.7	chr5	137514408	137523404	+	137514660	137514941	3	H3K4me3	H3K4me3	H3K4me3	No Meth/Exp+	no change
CD14	ENSG00000170458.9	chr5	140011313	140013286	-	140011482	140012739	4	none	none	H3K4me3	Meth+/Exp+	Methylable
PCDHA6	ENSG00000081842.13	chr5	140207563	140391929	+	140207725	140208078	3	none	H3K4me3	H3K4me3	Meth+/Exp-	Methylable
PCDHAC2	ENSG00000243232.3	chr5	140345820	140391936	+	140346105	140346931	10	Bivalent	H3K4me3	H3K4me3	No Meth/Exp-	no change
SLC25A2	ENSG00000120329.4	chr5	140682196	140683612	-	140683195	140683773	10	none	none	none	Meth+/Exp+	Methylated
PCDH12	ENSG00000113555.4	chr5	141323150	141349304	-	141348531	141349104	8	H3K4me3	H3K4me3	H3K4me3	No Meth/Exp+	no change
CTC-255N20.1	ENSG00000250343.1	chr5	146559767	146614422	-	146614283	146614560	8	Bivalent	Bivalent	none	No Meth/Exp+	no change
ADRB2	ENSG00000169252.4	chr5	148206156	148208196	+	148206075	148206482	6	Bivalent	Bivalent	none	No Meth/Exp-	no change
AFAP1L1	ENSG00000157510.9	chr5	148651434	148721365	+	148650920	148651772	5	Bivalent	Bivalent	H3K4me3	No Meth/Exp+	no change
AC010441.1	ENSG00000269636.1	chr5	150157867	150176297	+	150158223	150158654	2	none	H3K4me3	H3K4me3	No Meth/Exp+	no change
FAXDC2	ENSG00000170271.6	chr5	154198051	154238812	-	154237008	154238362	8	H3K4me3	H3K4me3	H3K4me3	No Meth/Exp-	no change
NIPAL4	ENSG00000172548.10	chr5	156887027	156901725	+	156886969	156887440	5	Bivalent	none	none	No Meth/Exp-	no change
RP11-175K6.1	ENSG00000245812.2	chr5	158527491	158544486	+	158527374	158527983	6	Bivalent	H3K4me3	Bivalent	Meth+/Exp+	Methylable
AC008697.1	ENSG00000249738.2	chr5	158737941	158789842	+	158758474	158758839	4	none	none	none	No Meth/Exp-	no change
CCNJL	ENSG00000135083.10	chr5	159678659	159772403	-	159738781	159739913	8	H3K4me3	H3K4me3	none	No Meth/Exp+	no change
PTTG1	ENSG00000164611.8	chr5	159848829	159855748	+	159848779	159849113	4	H3K4me3	H3K4me3	H3K4me3	No Meth/Exp+	no change
HMMR	ENSG00000072571.15	chr5	162887209	162918947	+	162886779	162887242	5	H3K4me3	H3K4me3	H3K4me3	No Meth/Exp+	no change
SLIT3	ENSG00000184347.10	chr5	168088745	168728133	-	168727429	168728275	9	Bivalent	H3K27me3	Bivalent	Meth+/Exp-	Methylable
RANBP17	ENSG00000204764.8	chr5	170288874	170727019	+	170288879	170289737	4	Bivalent	H3K4me3	none	Meth+/Exp-	Methylated
NKX2-5	ENSG00000183072.9	chr5	172659112	172662360	-	172661486	172662228	5	Bivalent	Bivalent	H3K27me3	No Meth/Exp+	no change
STC2	ENSG00000113739.6	chr5	172741716	172756506	-	172754056	172757098	16	Bivalent	Bivalent	Bivalent	No Meth/Exp+	no change
HK3	ENSG00000160883.6	chr5	176307870	176326333	-	176314451	176314662	3	none	H3K27me3	none	No Meth/Exp+	no change
RNF130	ENSG00000113269.9	chr5	179338651	179499118	-	179498291	179499338	5	none	H3K4me3	H3K4me3	No Meth/Exp-	no change
CTC-338M12.2	ENSG00000248473.1	chr5	180618046	180618852	-	180616157	180619114	12	Bivalent	Bivalent	H3K4me3	No Meth/Exp+	no change
FAM50B	ENSG00000145945.5	chr6	3849620	3851551	+	3849271	3851048	25	none	none	H3K4me3	Meth+/Exp-	Methylated
MAK	ENSG00000111837.7	chr6	10762956	10838764	-	10838098	10838915	6	none	H3K4me3	H3K4me3	No Meth/Exp+	no change
MYLIP	ENSG00000007944.10	chr6	16129356	16148479	+	16128992	16130023	11	none	none	H3K4me3	No Meth/Exp-	no change
NHLRC1	ENSG00000187566.3	chr6	18120718	18122851	-	18122250	18122994	6	Bivalent	none	H3K4me3	Meth+/Exp-	Methylable
SOX4	ENSG00000124766.4	chr6	21593972	21598847	+	21594613	21596437	3	H3K4me3	H3K4me3	H3K4me3	No Meth/Exp+	no change
KIAA0319	ENSG00000137261.9	chr6	24544332	24646383	-	24645931	24646591	9	none	none	H3K4me3	No Meth/Exp-	no change
HIST1H3A	ENSG00000198366.5	chr6	26020718	26021186	+	26020671	26021125	5	H3K4me3	H3K4me3	none	No Meth/Exp+	no change
HIST1H4B	ENSG00000124529.3	chr6	26027124	26027480	-	26027160	26027626	8	H3K4me3	H3K4me3	none	No Meth/Exp+	no change
HIST1H3B	ENSG00000124693.2	chr6	26031817	26032288	-	26031880	26032264	4	H3K4me3	H3K4me3	none	No Meth/Exp+	no change
HIST1H2AB	ENSG00000137259.2	chr6	26033320	26033796	-	26033474	26033787	5	H3K4me3	H3K4me3	none	No Meth/Exp+	no change
HIST1H2BB	ENSG00000196226.2	chr6	26043455	26043885	-	26044203	26044469	6	H3K4me3	H3K4me3	H3K4me3	No Meth/Exp+	no change
U91328.2	ENSG00000234816.2	chr6	26044217	26044585	+	26044203	26044469	6	H3K4me3	H3K4me3	H3K4me3	No Meth/Exp+	no change
HIST1H3C	ENSG00000196532.4	chr6	26045639	26046097	+	26045644	26046033	3	H3K4me3	H3K4me3	H3K4me3	No Meth/Exp+	no change
HIST1H1C	ENSG00000187837.2	chr6	26055968	26056699	-	26056167	26056798	9	H3K4me3	H3K4me3	H3K4me3	No Meth/Exp+	no change
HIST1H2BE	ENSG00000197697.3	chr6	26183958	26184454	+	26184036	26184336	3	H3K4me3	H3K4me3	H3K4me3	No Meth/Exp+	no change
HIST1H4D	ENSG00000188987.2	chr6	26188938	26189304	-	26188997	26189295	3	H3K4me3	H3K4me3	H3K4me3	No Meth/Exp+	no change
HIST1H2AE	ENSG00000168274.3	chr6	26217165	26217711	+	26217211	26217521	3	H3K4me3	H3K4me3	Bivalent	No Meth/Exp+	no change
HIST1H4F	ENSG00000198327.3	chr6	26240561	26240976	+	26240697	26240951	3	none	none	Bivalent	Meth+/Exp+	Methylable
HIST1H3F	ENSG00000256316.1	chr6	26250370	26250835	-	26250436	26250827	4	H3K4me3	H3K4me3	Bivalent	No Meth/Exp+	no change
HIST1H2BH	ENSG00000197459.2	chr6	26251879	26252303	+	26251898	26252233	3	H3K4me3	H3K4me3	Bivalent	No Meth/Exp+	no change
HIST1H4H	ENSG00000158406.2	chr6	26281283	26285762	-	26285423	26285940	9	H3K4me3	H3K4me3	H3K4me3	No Meth/Exp+	no change
HCG11	ENSG00000228223.1	chr6	26522076	26526807	+	26521947	26522579	4	H3K4me3	H3K4me3	H3K4me3	Meth+/Exp-	Methylated
LINC00240	ENSG00000224843.2	chr6	26924771	26991703	+	26987598	26988074	3	H3K4me3	none	H3K4me3	Meth+/Exp-	Methylable
HIST1H2BJ	ENSG00000124635.7	chr6	27093676	27100541	-	27100174	27101124	12	H3K4me3	H3K4me3	Bivalent	No Meth/Exp+	no change
HIST1H2AG	ENSG00000196787.2	chr6	27100832	27103070	+	27100174	27101124	12	H3K4me3	H3K4me3	Bivalent	No Meth/Exp+	no change
HIST1H2BK	ENSG00000197903.6	chr6	27106073	27114619	-	27114222	27115181	7	H3K4me3	H3K4me3	none	No Meth/Exp+	no change
HIST1H4I	ENSG00000198339.3	chr6	27107076	27108418	+	27107138	27107394	3	H3K4me3	H3K4me3	none	Meth+/Exp+	Methylable
HIST1H2AH	ENSG00000184825.4	chr6	27114861	27115317	+	27114222	27115181	7	H3K4me3	H3K4me3	none	No Meth/Exp+	no change
HIST1H4PS1	ENSG00000217862.2	chr6	27774853	27775117	+	27775329	27776258	10	H3K4me3	H3K4me3	Bivalent	No Meth/Exp+	no change
HIST1H2BL	ENSG00000185130.4	chr6	27775257	27775709	-	27775329	27776258	10	H3K4me3	H3K4me3	Bivalent	No Meth/Exp+	no change
HIST1H2AI	ENSG00000196747.3	chr6	27775899	27776429	+	27775329	27776258	10	H3K4me3	H3K4me3	Bivalent	No Meth/Exp+	no change
HIST1H3H	ENSG00000203813.4	chr6	27777842	27778314	+	27777855	27778251	3	H3K4me3	H3K4me3	Bivalent	No Meth/Exp+	no change
HIST1H2AK	ENSG00000184348.2	chr6	27805658	27806117	-	27805843	27806853	14	H3K4me3	H3K4me3	Bivalent	No Meth/Exp+	no change
HIST1H2AL	ENSG00000198374.3	chr6	27833034	27833606	+	27833120	27833406	4	H3K4me3	H3K4me3	Bivalent	No Meth/Exp+	no change
HIST1H1B	ENSG00000184357.3	chr6	27834570	27835359	-	27835190	27835461	7	H3K4me3	H3K4me3	Bivalent	No Meth/Exp+	no change
HIST1H4L	ENSG00000198558.2	chr6	27840926	27841289	-	27841001	27841244	4	H3K4me3	H3K4me3	Bivalent	Meth+/Exp+	Methylable
NKAPL	ENSG00000189134.3	chr6	28227098	28228736	+	28226979	28227483	9	none	H3K27me3	none	Meth+/Exp-	Methylated
XXbac-BPG170G13.32	ENSG00000272236.1	chr6	29719742	29719984	-	29720381	29721101	36	Bivalent	Bivalent	H3K4me3	No Meth/Exp+	no change
HLA-V	ENSG00000181126.9	chr6	29758731	29765588	+	29759946	29760903	26	Bivalent	H3K27me3	none	Meth+/Exp-	Methylated
HLA-A	ENSG00000206503.7	chr6	29909037	29913661	+	29910202	29911367	9	none	Bivalent	H3K4me3	Meth+/Exp+	Methylable
HLA-W	ENSG00000235290.1	chr6	29924373	29926347	+	29924201	29924533	6	none	none	none	No Meth/Exp+	no change
HLA-J	ENSG00000204622.6	chr6	29974360	29977733	+	29974220	29975369	38	Bivalent	none	none	Meth+/Exp+	Methylable
TCF19	ENSG00000137310.7	chr6	31126319	31134936	+	31125894	31126561	20	H3K4me3	H3K4me3	H3K4me3	No Meth/Exp+	no change
HLA-B	ENSG00000234745.5	chr6	31321649	31324965	-	31323946	31325211	12	Bivalent	Bivalent	H3K4me3	Meth+/Exp+	Methylable
DDAH2	ENSG00000213722.4	chr6	31694815	31698394	-	31695894	31698245	59	H3K4me3	H3K4me3	H3K4me3	Meth+/Exp+	Methylated
CLIC1	ENSG00000213719.4	chr6	31698358	31707540	-	31707489	31708336	30	H3K4me3	H3K4me3	H3K4me3	No Meth/Exp+	no change
MSH5	ENSG00000204410.10	chr6	31707725	31732622	+	31707489	31708336	30	H3K4me3	H3K4me3	H3K4me3	No Meth/Exp+	no change
PSMB8	ENSG00000204264.4	chr6	32808494	32812480	-	32811494	32811839	10	Bivalent	Bivalent	H3K4me3	No Meth/Exp+	no change
TAP1	ENSG00000168394.9	chr6	32812986	32821755	-	32820849	32822370	43	Bivalent	Bivalent	H3K4me3	No Meth/Exp+	no change
KIFC1	ENSG00000237649.3	chr6	33359313	33377701	+	33359097	33359975	24	H3K4me3	H3K4me3	H3K4me3	No Meth/Exp+	no change
TEAD3	ENSG00000007866.14	chr6	35441374	35464853	-	35464056	35466269	8	Bivalent	H3K4me3	none	Meth+/Exp+	Methylable
RP1-179N16.6	ENSG00000246982.2	chr6	36114475	36164982	-	36164132	36165205	4	H3K4me3	H3K4me3	H3K4me3	No Meth/Exp-	no change
CDKN1A	ENSG00000124762.9	chr6	36644305	36655116	+	36646244	36648465	14	Bivalent	H3K4me3	H3K4me3	No Meth/Exp+	no change
PI16	ENSG00000164530.9	chr6	36922209	36932613	+	36929837	36930135	3	none	none	none	No Meth/Exp-	no change
GLP1R	ENSG00000112164.5	chr6	39016574	39055519	+	39016307	39016998	6	Bivalent	none	H3K27me3	Meth+/Exp-	Methylable
KIF6	ENSG00000164627.13	chr6	39297766	39693181	-	39692743	39692966	3	H3K4me3	H3K4me3	H3K4me3	No Meth/Exp-	no change
DAAM2	ENSG00000146122.12	chr6	39760142	39872648	+	39760066	39760426	2	Bivalent	Bivalent	none	No Meth/Exp-	no change
VEGFA	ENSG00000112715.16	chr6	43737921	43754224	+	43737632	43739852	8	H3K4me3	none	H3K4me3	No Meth/Exp+	no change
RP1-261G23.7	ENSG00000272114.1	chr6	43738166	43738353	-	43737632	43739852	8	H3K4me3	none	H3K4me3	No Meth/Exp+	no change
RP1-8B1.4	ENSG00000231769.2	chr6	46064830	46097443	-	46097694	46097953	2	none	Bivalent	H3K4me3	No Meth/Exp-	no change
ENPP4	ENSG00000001561.6	chr6	46097730	46114436	+	46097694	46097953	2	none	Bivalent	H3K4me3	No Meth/Exp-	no change
RCAN2	ENSG00000172348.10	chr6	46188475	46459709	-	46458878	46459257	5	none	none	H3K4me3	No Meth/Exp-	no change
RP11-795J1.1	ENSG00000236466.1	chr6	46459789	46500495	+	46458878	46459257	5	none	none	H3K4me3	No Meth/Exp-	no change
CYP39A1	ENSG00000146233.3	chr6	46517541	46620523	-	46620541	46621189	9	none	Bivalent	H3K4me3	No Meth/Exp-	no change
SLC25A27	ENSG00000153291.11	chr6	46620678	46645930	+	46620541	46621189	9	none	Bivalent	H3K4me3	No Meth/Exp-	no change
TDRD6	ENSG00000180113.11	chr6	46655612	46672056	+	46655262	46656738	11	none	none	none	No Meth/Exp-	no change
PAQR8	ENSG00000170915.8	chr6	52226219	52272575	+	52226753	52228006	5	Bivalent	H3K4me3	H3K4me3	No Meth/Exp-	no change
GCLC	ENSG00000001084.6	chr6	53362139	53481768	-	53409120	53410099	7	H3K4me3	none	H3K4me3	No Meth/Exp-	no change
HMGCLL1	ENSG00000146151.8	chr6	55299167	55444012	-	55443732	55444092	7	Bivalent	H3K4me3	H3K4me3	Meth+/Exp-	Methylable
COL21A1	ENSG00000124749.12	chr6	55921388	56258892	-	56112188	56112444	3	none	H3K27me3	none	No Meth/Exp-	no change
KHDRBS2	ENSG00000112232.8	chr6	62389865	62996132	-	62995855	62996228	8	Bivalent	none	H3K4me3	Meth+/Exp-	Methylated
DDX43	ENSG00000080007.6	chr6	74104471	74127292	+	74104425	74104878	5	none	none	none	No Meth/Exp-	no change
SH3BGRL2	ENSG00000198478.6	chr6	80341000	80413372	+	80340861	80341346	2	none	H3K4me3	H3K4me3	No Meth/Exp-	no change
ELOVL4	ENSG00000118402.5	chr6	80624529	80657297	-	80656744	80657593	10	none	none	H3K4me3	No Meth/Exp-	no change
TTK	ENSG00000112742.5	chr6	80713604	80752244	+	80714149	80714568	9	H3K4me3	H3K4me3	H3K4me3	No Meth/Exp+	no change
FAM46A	ENSG00000112773.11	chr6	82201156	82462491	-	82461133	82463805	18	Bivalent	H3K4me3	none	No Meth/Exp+	no change
ME1	ENSG00000065833.7	chr6	83920108	84140797	-	84140412	84140998	7	none	none	H3K4me3	Meth+/Exp-	Methylated
RIPPLY2	ENSG00000203877.3	chr6	84562985	84567234	+	84562820	84563758	10	Bivalent	Bivalent	H3K4me3	No Meth/Exp-	no change
FUT9	ENSG00000172461.6	chr6	96463860	96663488	+	96463869	96464136	3	Bivalent	Bivalent	H3K4me3	No Meth/Exp-	no change
KLHL32	ENSG00000186231.12	chr6	97372605	97588630	+	97372181	97372661	4	none	none	H3K4me3	No Meth/Exp-	no change
BVES-AS1	ENSG00000203808.6	chr6	105584183	105617820	+	105584148	105585621	8	Bivalent	none	none	No Meth/Exp-	no change
POPDC3	ENSG00000132429.5	chr6	105606155	105627870	-	105627406	105627830	2	none	none	H3K4me3	Meth+/Exp-	Methylable
PRDM1	ENSG00000057657.10	chr6	106534195	106557814	+	106534136	106534385	4	Bivalent	Bivalent	Bivalent	No Meth/Exp+	no change
AIM1	ENSG00000112297.10	chr6	106959730	107018326	+	106959764	106960985	5	Bivalent	none	Bivalent	No Meth/Exp+	no change
CDK19	ENSG00000155111.10	chr6	110931181	111137161	-	111135515	111136913	9	H3K4me3	H3K4me3	H3K4me3	No Meth/Exp-	no change
LAMA4	ENSG00000112769.14	chr6	112429963	112576141	-	112575091	112575483	5	Bivalent	Bivalent	H3K4me3	No Meth/Exp+	no change
RP3-399L15.3	ENSG00000228624.3	chr6	114290865	114792869	+	114291411	114292767	11	H3K4me3	H3K4me3	H3K4me3	No Meth/Exp-	no change
HS3ST5	ENSG00000249853.3	chr6	114376750	114664209	-	114663328	114664859	6	none	Bivalent	H3K4me3	No Meth/Exp-	no change
NT5DC1	ENSG00000178425.9	chr6	116422012	116570660	+	116421673	116422382	11	H3K4me3	none	H3K4me3	No Meth/Exp-	no change
VGLL2	ENSG00000170162.9	chr6	117586721	117594728	+	117586482	117587156	8	Bivalent	Bivalent	Bivalent	No Meth/Exp+	no change
CLVS2	ENSG00000146352.8	chr6	123317116	123394072	+	123317164	123317753	8	Bivalent	Bivalent	none	No Meth/Exp-	no change
NKAIN2	ENSG00000188580.9	chr6	124125286	125146803	+	124124177	124125309	7	Bivalent	H3K4me3	H3K4me3	No Meth/Exp-	no change
RP11-510H23.1	ENSG00000236548.1	chr6	125230239	125284185	-	125283124	125284389	10	none	H3K4me3	H3K4me3	No Meth/Exp-	no change
RP11-624M8.1	ENSG00000237742.2	chr6	125899704	126070336	-	126068722	126071320	16	Bivalent	Bivalent	Bivalent	No Meth/Exp-	no change
NCOA7	ENSG00000111912.14	chr6	126102307	126252266	+	126111537	126112480	3	none	H3K4me3	H3K4me3	No Meth/Exp-	no change
CENPW	ENSG00000203760.4	chr6	126661320	126670021	+	126661135	126661387	7	H3K4me3	H3K4me3	H3K4me3	No Meth/Exp+	no change
PTPRK	ENSG00000152894.10	chr6	128289924	128841870	-	128840158	128842126	13	H3K4me3	H3K4me3	H3K4me3	No Meth/Exp-	no change
TMEM200A	ENSG00000164484.7	chr6	130686879	130764208	+	130686414	130687736	7	Bivalent	Bivalent	none	Meth+/Exp-	Methylable
MYB	ENSG00000118513.14	chr6	135502453	135540311	+	135501988	135504245	10	Bivalent	Bivalent	Bivalent	No Meth/Exp+	no change
MTFR2	ENSG00000146410.7	chr6	136552162	136571473	-	136571120	136571814	9	H3K4me3	H3K4me3	H3K4me3	No Meth/Exp+	no change
MAP7	ENSG00000135525.14	chr6	136663875	136871957	-	136870826	136872145	11	none	Bivalent	H3K4me3	No Meth/Exp-	no change
RP3-325F22.5	ENSG00000272189.1	chr6	136871799	136873692	+	136870826	136872145	11	none	Bivalent	H3K4me3	No Meth/Exp-	no change
RP11-356I2.4	ENSG00000237499.2	chr6	138144810	138189370	-	138187825	138189141	12	Bivalent	Bivalent	none	No Meth/Exp+	no change
TNFAIP3	ENSG00000118503.10	chr6	138188351	138204449	+	138187825	138189141	12	Bivalent	Bivalent	none	No Meth/Exp+	no change
KIAA1244	ENSG00000112379.8	chr6	138483058	138665800	+	138482534	138483710	9	Bivalent	Bivalent	H3K4me3	No Meth/Exp-	no change
RP11-390P2.4	ENSG00000225177.1	chr6	139013685	139018425	+	139013563	139014881	4	none	H3K4me3	none	No Meth/Exp+	no change
STX11	ENSG00000135604.9	chr6	144471663	144509507	+	144471069	144472017	7	Bivalent	Bivalent	H3K4me3	No Meth/Exp+	no change
STXBP5	ENSG00000164506.10	chr6	147525561	147706866	+	147525374	147525848	4	H3K4me3	none	H3K4me3	No Meth/Exp-	no change
ULBP1	ENSG00000111981.4	chr6	150285143	150294846	+	150284682	150286515	12	Bivalent	Bivalent	Bivalent	Meth+/Exp+	Methylable
RAET1K	ENSG00000218358.2	chr6	150319155	150326293	-	150326011	150326802	10	Bivalent	none	none	No Meth/Exp+	no change
ULBP3	ENSG00000131019.6	chr6	150384286	150390231	-	150389943	150390558	7	Bivalent	none	none	No Meth/Exp+	no change
FBXO5	ENSG00000112029.5	chr6	153291664	153304714	-	153303408	153304973	14	H3K4me3	H3K4me3	H3K4me3	No Meth/Exp+	no change
SYNJ2	ENSG00000078269.9	chr6	158402888	158520208	+	158402072	158403444	8	none	none	H3K4me3	Meth+/Exp-	Methylable
PRR18	ENSG00000176381.4	chr6	166719168	166721936	-	166720239	166722275	12	Bivalent	Bivalent	none	Meth+/Exp-	Methylated
AL009178.1	ENSG00000269155.1	chr6	168196210	168198927	+	168197142	168198164	10	H3K27me3	none	none	No Meth/Exp+	no change
AC093620.5	ENSG00000241269.1	chr7	5459458	5460398	+	5458503	5469256	41	Bivalent	H3K4me3	H3K4me3	No Meth/Exp+	no change
TWIST1	ENSG00000122691.8	chr7	19060614	19157295	-	19156050	19158042	19	Bivalent	Bivalent	Bivalent	Meth+/Exp+	Methylable
DNAH11	ENSG00000105877.13	chr7	21582833	21941457	+	21582443	21583313	8	Bivalent	Bivalent	none	No Meth/Exp+	no change
STEAP1B	ENSG00000105889.10	chr7	22459063	22672544	-	22539545	22540022	7	none	none	none	Meth+/Exp-	Methylated
IGF2BP3	ENSG00000136231.9	chr7	23349828	23510086	-	23508184	23509712	7	H3K4me3	H3K4me3	none	No Meth/Exp+	no change
CTD-2227E11.1	ENSG00000270933.1	chr7	25988277	25989023	-	25990012	25991320	5	H3K4me3	Bivalent	Bivalent	No Meth/Exp+	no change
AC004540.4	ENSG00000225792.1	chr7	26411764	26416321	-	26415746	26416891	5	Bivalent	none	Bivalent	No Meth/Exp+	no change
HOXA2	ENSG00000105996.5	chr7	27139721	27142430	-	27143181	27143479	7	none	none	none	Meth+/Exp+	Methylable
HOXA-AS4	ENSG00000253187.2	chr7	27208238	27211534	+	27208871	27209616	12	none	none	H3K27me3	Meth+/Exp+	Methylated
HOXA13	ENSG00000106031.6	chr7	27233122	27239725	-	27238690	27240311	9	none	H3K4me3	H3K27me3	Meth+/Exp+	Methylable
CPVL	ENSG00000106066.9	chr7	29034847	29235067	-	29233704	29235046	8	Bivalent	Bivalent	none	No Meth/Exp+	no change
FKBP9	ENSG00000122642.6	chr7	32997017	33046543	+	32996732	32997591	8	Bivalent	Bivalent	H3K4me3	No Meth/Exp+	no change
ANLN	ENSG00000011426.6	chr7	36429415	36493400	+	36429250	36429806	7	H3K4me3	H3K4me3	H3K4me3	No Meth/Exp-	no change
ELMO1	ENSG00000155849.11	chr7	36893961	37488852	-	37487354	37488672	12	Bivalent	none	H3K4me3	No Meth/Exp-	no change
SFRP4	ENSG00000106483.7	chr7	37945543	38065297	-	37955622	37956555	8	Bivalent	Bivalent	none	No Meth/Exp+	no change
STK17A	ENSG00000164543.5	chr7	43622357	43666385	+	43622682	43623392	3	none	none	H3K4me3	No Meth/Exp+	no change
IGFBP3	ENSG00000146674.10	chr7	45951949	45961473	-	45960137	45961347	10	Bivalent	Bivalent	Bivalent	No Meth/Exp+	no change
SEC61G	ENSG00000132432.9	chr7	54819943	54827667	-	54826581	54827188	7	H3K4me3	H3K4me3	H3K4me3	No Meth/Exp+	no change
RP11-745C15.2	ENSG00000234707.2	chr7	54827118	54872621	+	54826581	54827188	7	H3K4me3	H3K4me3	H3K4me3	No Meth/Exp+	no change
RP4-791C19.1	ENSG00000218586.3	chr7	55001392	55005877	+	55000876	55001135	3	none	none	none	No Meth/Exp+	no change
RP4-725G10.4	ENSG00000233028.1	chr7	56243327	56244105	+	56242406	56243298	4	none	none	H3K4me3	Meth+/Exp-	Methylable
FZD9	ENSG00000188763.3	chr7	72848109	72850450	+	72847933	72850032	7	H3K27me3	none	H3K4me3	Meth+/Exp-	Methylated
KIAA1324L	ENSG00000164659.10	chr7	86506222	86689015	-	86688832	86689238	5	none	none	H3K4me3	No Meth/Exp-	no change
RUNDC3B	ENSG00000105784.11	chr7	87256864	87461611	+	87256958	87258444	11	Bivalent	none	H3K4me3	Meth+/Exp-	Methylated
STEAP2	ENSG00000157214.9	chr7	89796904	89867451	+	89840813	89841491	10	none	Bivalent	none	No Meth/Exp-	no change
AC002454.1	ENSG00000237819.1	chr7	92465797	92546501	+	92462201	92466387	31	Bivalent	H3K4me3	H3K4me3	No Meth/Exp+	no change
CALCR	ENSG00000004948.9	chr7	93053799	93204042	-	93204085	93204381	6	Bivalent	Bivalent	none	No Meth/Exp-	no change
PDK4	ENSG00000004799.7	chr7	95212811	95225803	-	95225503	95226194	7	Bivalent	Bivalent	none	No Meth/Exp-	no change
DYNC1I1	ENSG00000158560.10	chr7	95401866	95739634	+	95401691	95402432	6	Bivalent	Bivalent	H3K4me3	No Meth/Exp-	no change
RP11-758P17.3	ENSG00000240211.1	chr7	100033827	100036127	+	100033262	100034253	7	H3K4me3	H3K4me3	H3K4me3	No Meth/Exp+	no change
NYAP1	ENSG00000166924.4	chr7	100081550	100092422	+	100080693	100081371	5	H3K4me3	H3K4me3	H3K4me3	No Meth/Exp-	no change
EPHB4	ENSG00000196411.5	chr7	100400187	100425121	-	100424424	100425626	9	H3K4me3	H3K4me3	Bivalent	No Meth/Exp+	no change
MUC3A	ENSG00000169894.13	chr7	100547187	100611118	+	100608736	100609793	7	Bivalent	H3K27me3	Bivalent	Meth+/Exp+	Methylable
NAT16	ENSG00000167011.4	chr7	100813774	100823557	-	100823307	100823701	3	Bivalent	Bivalent	H3K27me3	No Meth/Exp+	no change
LHFPL3	ENSG00000187416.7	chr7	103969104	104549001	+	103968783	103969959	6	Bivalent	Bivalent	none	No Meth/Exp+	no change
TES	ENSG00000135269.13	chr7	115850547	115898837	+	115850370	115851028	6	Bivalent	none	Bivalent	Meth+/Exp+	Methylable
CAV1	ENSG00000105974.7	chr7	116164839	116201233	+	116164703	116166735	23	none	Bivalent	Bivalent	No Meth/Exp+	no change
TSPAN12	ENSG00000106025.4	chr7	120427376	120498456	-	120497120	120498220	4	H3K4me3	H3K4me3	H3K4me3	No Meth/Exp+	no change
PTPRZ1	ENSG00000106278.7	chr7	121513143	121702090	+	121513046	121513911	6	none	H3K4me3	Bivalent	No Meth/Exp+	no change
GPR37	ENSG00000170775.2	chr7	124386051	124405681	-	124404700	124406189	10	Bivalent	Bivalent	none	No Meth/Exp-	no change
LEP	ENSG00000174697.4	chr7	127881337	127897681	+	127880750	127881375	6	none	none	H3K27me3	Meth+/Exp+	Methylable
HILPDA	ENSG00000135245.9	chr7	128095903	128098472	+	128095678	128096197	7	H3K4me3	H3K4me3	H3K4me3	No Meth/Exp+	no change
SMO	ENSG00000128602.5	chr7	128828713	128853386	+	128828333	128829366	10	Bivalent	Bivalent	none	No Meth/Exp+	no change
SVOPL	ENSG00000157703.11	chr7	138279030	138386097	-	138348962	138349444	3	H3K4me3	H3K4me3	H3K4me3	No Meth/Exp-	no change
KLRG2	ENSG00000188883.4	chr7	139137436	139168458	-	139167480	139168712	10	Bivalent	Bivalent	none	Meth+/Exp-	Methylable
AC073342.12	ENSG00000231840.1	chr7	142952357	142984473	-	142985047	142985810	4	H3K4me3	H3K4me3	H3K4me3	No Meth/Exp-	no change
AC093673.5	ENSG00000232533.1	chr7	143076785	143077588	-	143077469	143079169	11	H3K4me3	H3K4me3	H3K4me3	No Meth/Exp+	no change
ZYX	ENSG00000159840.11	chr7	143078173	143088204	+	143077469	143079169	11	H3K4me3	H3K4me3	H3K4me3	No Meth/Exp+	no change
FAM115C	ENSG00000170379.15	chr7	143318043	143427502	+	143317293	143318004	2	none	none	none	No Meth/Exp+	no change
XRCC2	ENSG00000196584.2	chr7	152341864	152373250	-	152372980	152373421	6	H3K4me3	H3K4me3	H3K4me3	No Meth/Exp+	no change
AC144652.1	ENSG00000273117.1	chr7	155087628	155089251	-	155088705	155090212	8	H3K4me3	H3K4me3	H3K4me3	No Meth/Exp-	no change
AC008060.7	ENSG00000218672.1	chr7	155174771	155189051	+	155174128	155175248	7	none	Bivalent	Bivalent	No Meth/Exp-	no change
KBTBD11	ENSG00000176595.3	chr8	1922044	1955102	+	1921559	1922872	4	Bivalent	H3K4me3	H3K4me3	No Meth/Exp-	no change
RP11-378A12.1	ENSG00000249694.2	chr8	2447076	2480453	-	2480425	2480920	3	none	none	none	Meth+/Exp-	Methylable
PPP1R3B	ENSG00000173281.4	chr8	8993765	9009084	-	9008058	9009353	9	none	H3K4me3	none	No Meth/Exp+	no change
FGF20	ENSG00000078579.8	chr8	16849678	16859690	-	16859044	16859452	3	Bivalent	Bivalent	H3K4me3	No Meth/Exp-	no change
MICU3	ENSG00000155970.7	chr8	16884747	16980153	+	16884363	16885339	6	none	H3K4me3	H3K4me3	No Meth/Exp-	no change
MTMR7	ENSG00000003987.9	chr8	17155539	17271037	-	17270603	17271120	8	none	Bivalent	H3K4me3	Meth+/Exp-	Methylable
MTUS1	ENSG00000129422.9	chr8	17501304	17658426	-	17658166	17659321	8	Bivalent	Bivalent	Bivalent	No Meth/Exp-	no change
SH2D4A	ENSG00000104611.7	chr8	19171128	19253729	+	19170999	19172056	5	Bivalent	none	none	No Meth/Exp+	no change
LPL	ENSG00000175445.10	chr8	19759228	19824769	+	19796843	19798006	5	Bivalent	H3K4me3	none	No Meth/Exp+	no change
DOK2	ENSG00000147443.8	chr8	21766384	21771371	-	21769694	21770080	2	none	none	none	No Meth/Exp+	no change
NPM2	ENSG00000158806.9	chr8	21881636	21894408	+	21882245	21882883	4	Bivalent	Bivalent	Bivalent	Meth+/Exp-	Methylable
HR	ENSG00000168453.10	chr8	21971928	21990897	-	21987532	21989013	8	Bivalent	H3K27me3	H3K4me3	No Meth/Exp-	no change
LGI3	ENSG00000168481.4	chr8	22004338	22014597	-	22014152	22014559	5	Bivalent	none	none	No Meth/Exp-	no change
SFTPC	ENSG00000168484.8	chr8	22014426	22021992	+	22014152	22014559	5	Bivalent	none	none	No Meth/Exp-	no change
SLC39A14	ENSG00000104635.9	chr8	22224762	22291642	+	22224519	22225244	7	H3K4me3	none	H3K4me3	No Meth/Exp+	no change
PEBP4	ENSG00000134020.6	chr8	22570769	22857513	-	22856800	22857728	5	H3K4me3	none	H3K4me3	No Meth/Exp-	no change
RP11-875O11.1	ENSG00000245025.2	chr8	22842109	22876848	-	22864324	22864588	2	none	none	none	No Meth/Exp+	no change
TNFRSF10B	ENSG00000120889.8	chr8	22877646	22926692	-	22925655	22926912	13	none	H3K4me3	Bivalent	No Meth/Exp+	no change
TNFRSF10C	ENSG00000173535.9	chr8	22941868	22974950	+	22960384	22960927	7	Bivalent	none	none	No Meth/Exp+	no change
TNFRSF10D	ENSG00000173530.5	chr8	22993101	23021543	-	23021056	23021588	5	none	Bivalent	none	Meth+/Exp+	Methylable
LOXL2	ENSG00000134013.11	chr8	23154702	23282841	-	23260442	23261867	9	Bivalent	H3K4me3	none	No Meth/Exp+	no change
CTC-756D1.2	ENSG00000253390.1	chr8	23316114	23342484	+	23314664	23315490	11	none	H3K4me3	H3K4me3	No Meth/Exp+	no change
GS1-72M22.1	ENSG00000272163.1	chr8	24769678	24772230	-	24770908	24772547	15	Bivalent	Bivalent	H3K4me3	Meth+/Exp-	Methylated
DOCK5	ENSG00000147459.13	chr8	25042238	25275598	+	25041795	25042820	4	none	H3K4me3	H3K4me3	Meth+/Exp-	Methylated
CDCA2	ENSG00000184661.9	chr8	25316513	25365436	+	25315286	25317028	13	H3K4me3	H3K4me3	H3K4me3	No Meth/Exp+	no change
PBK	ENSG00000168078.5	chr8	27667137	27695612	-	27695095	27695479	2	H3K4me3	H3K4me3	H3K4me3	No Meth/Exp+	no change
RBPMS	ENSG00000157110.11	chr8	30241944	30429778	+	30241416	30242878	5	H3K4me3	H3K4me3	Bivalent	No Meth/Exp+	no change
RNF122	ENSG00000133874.1	chr8	33405273	33424643	-	33423939	33424895	6	H3K4me3	H3K4me3	H3K4me3	No Meth/Exp+	no change
DUSP26	ENSG00000133878.4	chr8	33448856	33457624	-	33456915	33457515	6	Bivalent	Bivalent	H3K4me3	No Meth/Exp-	no change
EIF4EBP1	ENSG00000187840.4	chr8	37887859	37917883	+	37887692	37888830	11	H3K4me3	none	H3K4me3	No Meth/Exp+	no change
HTRA4	ENSG00000169495.4	chr8	38831683	38846181	+	38831592	38832353	5	Bivalent	none	none	Meth+/Exp+	Methylated
SFRP1	ENSG00000104332.7	chr8	41119481	41167016	-	41165852	41167140	8	Bivalent	Bivalent	none	Meth+/Exp-	Methylable
GOLGA7	ENSG00000147533.12	chr8	41347915	41368499	+	41347794	41348581	6	H3K4me3	H3K4me3	H3K4me3	No Meth/Exp-	no change
CEBPD	ENSG00000221869.4	chr8	48649471	48651648	-	48649766	48651653	9	Bivalent	H3K4me3	H3K4me3	No Meth/Exp+	no change
RP11-567J20.2	ENSG00000253688.1	chr8	49464575	49469001	-	49468683	49468959	5	Bivalent	none	none	No Meth/Exp+	no change
EFCAB1	ENSG00000034239.6	chr8	49623348	49647870	-	49647702	49647988	5	Bivalent	none	none	Meth+/Exp-	Methylable
PXDNL	ENSG00000147485.8	chr8	52232138	52722005	-	52321162	52322221	7	none	none	none	No Meth/Exp+	no change
CYP7B1	ENSG00000172817.3	chr8	65500320	65711318	-	65710990	65711722	10	Bivalent	none	H3K4me3	Meth+/Exp-	Methylated
RP11-664D7.4	ENSG00000248801.3	chr8	69215703	69243726	-	69242920	69243803	7	Bivalent	Bivalent	none	No Meth/Exp-	no change
C8orf34	ENSG00000165084.11	chr8	69242957	69731257	+	69242920	69243803	7	Bivalent	Bivalent	none	No Meth/Exp-	no change
RP11-382J12.1	ENSG00000246366.2	chr8	71520812	71575514	+	71519680	71520857	5	H3K4me3	H3K4me3	H3K4me3	No Meth/Exp+	no change
RDH10	ENSG00000121039.5	chr8	74206847	74237516	+	74206223	74208179	8	Bivalent	none	none	No Meth/Exp+	no change
CTD-2320G14.2	ENSG00000253596.1	chr8	75259992	75262285	-	75262521	75263044	7	H3K4me3	H3K4me3	H3K4me3	No Meth/Exp-	no change
CRISPLD1	ENSG00000121005.4	chr8	75896750	75946793	+	75896528	75897116	7	H3K4me3	H3K4me3	H3K4me3	No Meth/Exp+	no change
HNF4G	ENSG00000164749.7	chr8	76320149	76479078	+	76319450	76320196	6	Bivalent	none	Bivalent	No Meth/Exp+	no change
IL7	ENSG00000104432.8	chr8	79587978	79717758	-	79716681	79717403	3	Bivalent	Bivalent	none	No Meth/Exp+	no change
RP11-257P3.3	ENSG00000253374.1	chr8	82433853	82445510	+	82434436	82434665	4	none	none	none	No Meth/Exp+	no change
IMPA1P	ENSG00000251521.2	chr8	82517804	82543369	-	82542798	82543475	6	Bivalent	none	none	No Meth/Exp+	no change
CA3	ENSG00000164879.6	chr8	86285665	86361269	+	86350765	86351196	6	Bivalent	H3K27me3	H3K4me3	No Meth/Exp+	no change
DCAF4L2	ENSG00000176566.3	chr8	88882973	88886296	-	88886171	88886445	8	none	none	none	No Meth/Exp+	no change
NECAB1	ENSG00000123119.7	chr8	91803778	91971636	+	91803656	91804141	6	Bivalent	none	none	Meth+/Exp-	Methylated
TRIQK	ENSG00000205133.7	chr8	93895758	94029901	-	93977793	93978469	3	H3K4me3	H3K4me3	H3K4me3	No Meth/Exp-	no change
TSPYL5	ENSG00000180543.3	chr8	98285717	98290176	-	98289604	98290404	6	none	none	H3K4me3	Meth+/Exp-	Methylated
C8orf47	ENSG00000177459.6	chr8	99076539	99105838	+	99076754	99077244	5	Bivalent	Bivalent	none	No Meth/Exp-	no change
FBXO43	ENSG00000156509.9	chr8	101145588	101158028	-	101157647	101158215	3	none	none	H3K4me3	No Meth/Exp+	no change
CTHRC1	ENSG00000164932.8	chr8	104383743	104395225	+	104383409	104384109	9	Bivalent	none	H3K4me3	Meth+/Exp+	Methylable
DPYS	ENSG00000147647.8	chr8	105342552	105479281	-	105478672	105479340	5	Bivalent	none	H3K27me3	Meth+/Exp-	Methylable
RSPO2	ENSG00000147655.6	chr8	108911544	109095913	-	109094485	109095849	8	Bivalent	Bivalent	none	No Meth/Exp-	no change
TMEM74	ENSG00000164841.4	chr8	109619079	109799844	-	109799429	109799847	4	none	Bivalent	H3K4me3	No Meth/Exp-	no change
SAMD12	ENSG00000177570.9	chr8	119201698	119634234	-	119633926	119634313	5	Bivalent	Bivalent	H3K4me3	No Meth/Exp-	no change
KB-1471A8.1	ENSG00000245330.4	chr8	120879659	120886728	-	120885814	120886610	8	H3K4me3	none	H3K4me3	No Meth/Exp-	no change
DEPTOR	ENSG00000155792.5	chr8	120885957	121063152	+	120885814	120886610	8	H3K4me3	none	H3K4me3	No Meth/Exp-	no change
COL14A1	ENSG00000187955.7	chr8	121072019	121384275	+	121137099	121137778	4	Bivalent	Bivalent	none	No Meth/Exp+	no change
MYC	ENSG00000136997.10	chr8	128747680	128753674	+	128747805	128751279	26	none	none	none	No Meth/Exp+	no change
RP11-473O4.3	ENSG00000253720.1	chr8	130952102	130961640	+	130951372	130952651	9	H3K4me3	H3K4me3	H3K4me3	No Meth/Exp-	no change
CTD-3064M3.4	ENSG00000244998.1	chr8	142400039	142402674	-	142401533	142402494	4	none	none	none	No Meth/Exp+	no change
PTP4A3	ENSG00000184489.7	chr8	142402093	142441620	+	142401533	142402494	4	none	none	none	No Meth/Exp+	no change
LY6K	ENSG00000160886.9	chr8	143781529	143786545	+	143781581	143782609	6	none	none	none	No Meth/Exp-	no change
CTD-2292P10.4	ENSG00000253741.1	chr8	143783670	143808391	-	143807788	143809310	7	Bivalent	H3K4me3	H3K4me3	No Meth/Exp-	no change
LYNX1	ENSG00000180155.14	chr8	143845752	143859640	-	143858279	143859411	14	none	none	H3K4me3	No Meth/Exp-	no change
GLDC	ENSG00000178445.8	chr9	6532464	6645650	-	6645080	6645975	2	Bivalent	H3K4me3	none	No Meth/Exp+	no change
RP11-390F4.6	ENSG00000236924.1	chr9	6645956	6670635	+	6645080	6645975	2	Bivalent	H3K4me3	none	No Meth/Exp+	no change
RP11-75C9.1	ENSG00000225706.1	chr9	8858130	8862255	+	8857485	8858708	6	Bivalent	H3K4me3	H3K4me3	No Meth/Exp-	no change
RP11-354P17.15	ENSG00000261696.1	chr9	21394887	21396345	-	21396071	21396364	3	none	Bivalent	H3K4me3	No Meth/Exp-	no change
MOB3B	ENSG00000120162.9	chr9	27325207	27529779	-	27528976	27529885	3	H3K4me3	H3K4me3	H3K4me3	No Meth/Exp-	no change
ANKRD18B	ENSG00000230453.5	chr9	33524392	33573007	+	33523494	33524796	3	Bivalent	Bivalent	none	No Meth/Exp-	no change
RUSC2	ENSG00000198853.7	chr9	35490124	35561895	+	35489704	35490700	3	none	H3K4me3	H3K4me3	No Meth/Exp-	no change
CA9	ENSG00000107159.8	chr9	35673853	35681156	+	35675648	35676375	3	none	H3K27me3	H3K4me3	No Meth/Exp+	no change
TPM2	ENSG00000198467.9	chr9	35681989	35691017	-	35689610	35691101	3	H3K4me3	H3K4me3	H3K4me3	No Meth/Exp+	no change
MSMP	ENSG00000215183.4	chr9	35752987	35756610	-	35756948	35757339	2	H3K4me3	none	H3K4me3	No Meth/Exp+	no change
MELK	ENSG00000165304.3	chr9	36572859	36677678	+	36572703	36573073	3	H3K4me3	H3K4me3	H3K4me3	No Meth/Exp+	no change
FRMPD1	ENSG00000070601.5	chr9	37650997	37746901	+	37650696	37651409	3	Bivalent	Bivalent	none	No Meth/Exp-	no change
ANKRD18A	ENSG00000180071.14	chr9	38540566	38620657	-	38619908	38622631	10	Bivalent	Bivalent	none	Meth+/Exp-	Methylable
FAM201A	ENSG00000204860.4	chr9	38620471	38624987	+	38619908	38622631	10	Bivalent	Bivalent	none	Meth+/Exp-	Methylable
PIP5K1B	ENSG00000107242.13	chr9	71320575	71624092	+	71319698	71320937	4	Bivalent	H3K4me3	H3K4me3	No Meth/Exp-	no change
ABHD17B	ENSG00000107362.9	chr9	74477368	74525847	-	74525249	74526679	4	H3K4me3	H3K4me3	H3K4me3	No Meth/Exp-	no change
PRUNE2	ENSG00000106772.13	chr9	79226292	79521003	-	79520803	79521508	4	Bivalent	none	none	No Meth/Exp-	no change
TLE4	ENSG00000106829.14	chr9	82186688	82341658	+	82185479	82188560	11	H3K4me3	H3K4me3	H3K4me3	No Meth/Exp-	no change
RASEF	ENSG00000165105.9	chr9	85594500	85678092	-	85677015	85678321	5	Bivalent	H3K27me3	H3K27me3	Meth+/Exp+	Methylable
FRMD3	ENSG00000172159.11	chr9	85857905	86153461	-	86152353	86153777	5	Bivalent	Bivalent	none	No Meth/Exp+	no change
AGTPBP1	ENSG00000135049.11	chr9	88161455	88356944	-	88356140	88357365	2	H3K4me3	H3K4me3	H3K4me3	No Meth/Exp-	no change
CKS2	ENSG00000123975.4	chr9	91926113	91931618	+	91925372	91926639	7	H3K4me3	H3K4me3	H3K4me3	No Meth/Exp+	no change
BARX1	ENSG00000131668.9	chr9	96713905	96717654	-	96713326	96718186	14	Bivalent	none	Bivalent	Meth+/Exp+	Methylable
GABBR2	ENSG00000136928.4	chr9	101050391	101471479	-	101469579	101472154	10	Bivalent	Bivalent	H3K4me3	No Meth/Exp-	no change
COL15A1	ENSG00000204291.6	chr9	101705461	101833069	+	101705907	101706682	4	Bivalent	none	Bivalent	No Meth/Exp+	no change
TMEFF1	ENSG00000241697.3	chr9	103204560	103339918	+	103235171	103236627	4	H3K4me3	H3K4me3	H3K4me3	No Meth/Exp-	no change
GRIN3A	ENSG00000198785.4	chr9	104331635	104500862	-	104499849	104501076	6	Bivalent	H3K27me3	Bivalent	Meth+/Exp-	Methylable
ABCA1	ENSG00000165029.11	chr9	107543283	107690518	-	107689847	107690798	5	Bivalent	H3K4me3	H3K4me3	No Meth/Exp+	no change
SLC44A1	ENSG00000070214.11	chr9	108006903	108201452	+	108006467	108007921	4	H3K4me3	none	H3K4me3	No Meth/Exp-	no change
LPAR1	ENSG00000198121.9	chr9	113635543	113800981	-	113799913	113801375	5	Bivalent	none	H3K4me3	Meth+/Exp-	Methylable
RP11-276E15.4	ENSG00000226609.1	chr9	115511182	115512736	-	115512611	115513757	5	none	H3K4me3	H3K4me3	No Meth/Exp-	no change
SNX30	ENSG00000148158.12	chr9	115513118	115643951	+	115512611	115513757	5	none	H3K4me3	H3K4me3	No Meth/Exp-	no change
SLC31A2	ENSG00000136867.6	chr9	115913222	115926417	+	115913081	115913807	3	none	none	H3K4me3	No Meth/Exp-	no change
ALAD	ENSG00000148218.11	chr9	116148597	116163613	-	116163208	116163848	4	H3K4me3	H3K4me3	H3K4me3	No Meth/Exp-	no change
DFNB31	ENSG00000095397.9	chr9	117164360	117267730	-	117266468	117268094	8	Bivalent	none	none	No Meth/Exp-	no change
BRINP1	ENSG00000078725.8	chr9	121915736	122131745	-	122131086	122132214	6	Bivalent	Bivalent	none	Meth+/Exp-	Methylable
MEGF9	ENSG00000106780.7	chr9	123363091	123476748	-	123475985	123477255	3	Bivalent	H3K4me3	H3K4me3	No Meth/Exp-	no change
TTLL11	ENSG00000175764.10	chr9	124584207	124855885	-	124854824	124855819	3	Bivalent	none	H3K4me3	No Meth/Exp-	no change
RP11-85O21.2	ENSG00000236668.2	chr9	126768556	126771675	-	126770663	126772091	3	Bivalent	Bivalent	Bivalent	No Meth/Exp-	no change
NEK6	ENSG00000119408.12	chr9	127019885	127115586	+	127020249	127020741	2	none	H3K4me3	H3K4me3	No Meth/Exp+	no change
OLFML2A	ENSG00000185585.15	chr9	127539437	127577164	+	127539239	127540081	4	Bivalent	Bivalent	none	No Meth/Exp+	no change
MIR219-2	ENSG00000207955.2	chr9	131154291	131155789	-	131154346	131155923	5	Bivalent	H3K4me3	H3K4me3	Meth+/Exp-	Methylable
CERCAM	ENSG00000167123.14	chr9	131174030	131199626	+	131182468	131183335	3	Bivalent	H3K4me3	H3K4me3	No Meth/Exp-	no change
WDR34	ENSG00000119333.7	chr9	131395940	131419066	-	131418671	131419447	3	H3K4me3	H3K4me3	H3K4me3	No Meth/Exp+	no change
PKN3	ENSG00000160447.6	chr9	131464802	131483197	+	131464843	131465830	3	H3K4me3	H3K4me3	H3K4me3	No Meth/Exp+	no change
FNBP1	ENSG00000187239.12	chr9	132649466	132805473	-	132804279	132806003	8	none	H3K4me3	H3K4me3	No Meth/Exp-	no change
LAMC3	ENSG00000050555.13	chr9	133884469	133969860	+	133884359	133885010	2	Bivalent	none	none	No Meth/Exp+	no change
C9orf171	ENSG00000188523.4	chr9	135285430	135448704	+	135285310	135285897	2	Bivalent	Bivalent	none	No Meth/Exp+	no change
COL5A1	ENSG00000130635.11	chr9	137533620	137736686	+	137533359	137534397	4	none	none	none	No Meth/Exp+	no change
C9orf172	ENSG00000232434.1	chr9	139738867	139741797	+	139738276	139744618	17	H3K4me3	H3K4me3	H3K4me3	No Meth/Exp-	no change
PTGDS	ENSG00000107317.7	chr9	139871956	139879887	+	139872237	139873143	4	none	none	H3K4me3	Meth+/Exp-	Methylable
C9orf139	ENSG00000180539.4	chr9	139921916	139931234	+	139922197	139923447	5	none	H3K4me3	H3K4me3	No Meth/Exp-	no change
TOR4A	ENSG00000198113.2	chr9	140172201	140177093	+	140172613	140176105	10	Bivalent	none	none	Meth+/Exp+	Methylated
IDI1	ENSG00000067064.6	chr10	1085848	1095110	-	1094337	1095594	12	H3K4me3	H3K4me3	H3K4me3	No Meth/Exp-	no change
ADARB2	ENSG00000185736.11	chr10	1228073	1779670	-	1778784	1780018	12	Bivalent	Bivalent	Bivalent	Meth+/Exp-	Methylable
AKR1E2	ENSG00000165568.13	chr10	4828821	4890254	+	4868125	4868949	8	Bivalent	H3K27me3	none	Meth+/Exp-	Methylated
PRKCQ	ENSG00000065675.10	chr10	6469105	6622263	-	6621907	6622642	9	Bivalent	Bivalent	H3K4me3	No Meth/Exp-	no change
PRKCQ-AS1	ENSG00000237943.2	chr10	6622381	6658414	+	6621907	6622642	9	Bivalent	Bivalent	H3K4me3	No Meth/Exp-	no change
PROSER2-AS1	ENSG00000225778.1	chr10	11891612	11936699	-	11936169	11937060	3	none	none	none	No Meth/Exp-	no change
MCM10	ENSG00000065328.12	chr10	13203554	13253104	+	13203436	13203790	7	none	H3K4me3	H3K4me3	No Meth/Exp+	no change
FAM107B	ENSG00000065809.9	chr10	14560556	14816896	-	14645752	14646705	4	Bivalent	none	H3K4me3	No Meth/Exp-	no change
CDNF	ENSG00000185267.5	chr10	14861249	14880574	-	14879769	14881041	10	H3K4me3	H3K4me3	H3K4me3	No Meth/Exp-	no change
ACBD7	ENSG00000176244.6	chr10	15119522	15130775	-	15130386	15130913	8	none	H3K4me3	H3K4me3	No Meth/Exp-	no change
C10orf111	ENSG00000176236.4	chr10	15137384	15139318	-	15138965	15139851	13	H3K4me3	H3K4me3	H3K4me3	No Meth/Exp-	no change
VIM-AS1	ENSG00000229124.2	chr10	17256238	17271984	-	17270430	17272617	15	Bivalent	H3K4me3	Bivalent	No Meth/Exp+	no change
VIM	ENSG00000026025.9	chr10	17270258	17279592	+	17270430	17272617	15	Bivalent	H3K4me3	Bivalent	No Meth/Exp+	no change
PTPLA	ENSG00000165996.9	chr10	17631958	17659376	-	17658665	17659639	6	H3K4me3	none	H3K4me3	No Meth/Exp-	no change
NEBL	ENSG00000078114.14	chr10	21068902	21463116	-	21462128	21463808	8	Bivalent	none	H3K4me3	No Meth/Exp-	no change
NEBL-AS1	ENSG00000231920.1	chr10	21462943	21463977	+	21462128	21463808	8	Bivalent	none	H3K4me3	No Meth/Exp-	no change
PIP4K2A	ENSG00000150867.9	chr10	22823778	23003484	-	23002155	23003790	7	none	none	H3K4me3	No Meth/Exp-	no change
MYO3A	ENSG00000095777.10	chr10	26223196	26501456	+	26222921	26224022	4	Bivalent	Bivalent	none	Meth+/Exp-	Methylable
MKX	ENSG00000150051.9	chr10	27961804	28034989	-	28030182	28035211	30	Bivalent	Bivalent	Bivalent	Meth+/Exp-	Methylable
SVIL	ENSG00000197321.10	chr10	29746267	30025710	-	30024072	30026077	12	Bivalent	none	none	Meth+/Exp+	Methylable
NRP1	ENSG00000099250.13	chr10	33466420	33625190	-	33623120	33626197	12	Bivalent	H3K4me3	none	No Meth/Exp+	no change
MARCH8	ENSG00000165406.11	chr10	45950035	46090354	-	46089871	46090462	3	none	H3K4me3	H3K4me3	No Meth/Exp-	no change
LINC00842	ENSG00000223477.3	chr10	47011753	47174018	-	47151424	47151676	3	none	none	none	No Meth/Exp-	no change
RP11-292F22.7	ENSG00000259942.1	chr10	47656084	47657233	+	47655677	47656379	5	Bivalent	Bivalent	H3K4me3	No Meth/Exp-	no change
C10orf53	ENSG00000178645.8	chr10	50887697	50918307	+	50887565	50887862	7	Bivalent	none	none	Meth+/Exp-	Methylable
PRKG1-AS1	ENSG00000236671.3	chr10	53990502	54073888	-	54073989	54074827	7	Bivalent	none	none	No Meth/Exp-	no change
ZWINT	ENSG00000122952.12	chr10	58116989	58121036	-	58121059	58121275	7	H3K4me3	H3K4me3	H3K4me3	No Meth/Exp+	no change
FAM13C	ENSG00000148541.8	chr10	61005890	61122939	-	61122306	61122536	8	Bivalent	none	H3K4me3	No Meth/Exp-	no change
CDK1	ENSG00000170312.11	chr10	62538089	62554610	+	62537970	62538862	15	H3K4me3	H3K4me3	H3K4me3	No Meth/Exp+	no change
RTKN2	ENSG00000182010.6	chr10	63942794	64028466	-	64028041	64028706	7	H3K4me3	none	H3K4me3	No Meth/Exp+	no change
REEP3	ENSG00000165476.8	chr10	65281123	65384883	+	65280870	65282030	7	H3K4me3	H3K4me3	H3K4me3	No Meth/Exp-	no change
STOX1	ENSG00000165730.10	chr10	70587298	70655188	+	70586917	70588209	7	none	H3K4me3	H3K4me3	No Meth/Exp-	no change
TSPAN15	ENSG00000099282.5	chr10	71211229	71267425	+	71211116	71211780	7	Bivalent	none	H3K4me3	No Meth/Exp-	no change
COL13A1	ENSG00000197467.9	chr10	71561644	71724031	+	71561302	71562876	13	Bivalent	Bivalent	Bivalent	No Meth/Exp+	no change
NODAL	ENSG00000156574.5	chr10	72192071	72207707	-	72200065	72201368	5	Bivalent	H3K27me3	none	No Meth/Exp+	no change
CDH23	ENSG00000107736.15	chr10	73156691	73575702	+	73156164	73157954	11	Bivalent	H3K27me3	Bivalent	No Meth/Exp-	no change
PPP3CB	ENSG00000107758.11	chr10	75196186	75255782	-	75255033	75255808	7	H3K4me3	H3K4me3	H3K4me3	No Meth/Exp-	no change
USP54	ENSG00000166348.13	chr10	75257296	75385711	-	75385082	75385994	4	H3K4me3	H3K4me3	H3K4me3	No Meth/Exp-	no change
CAMK2G	ENSG00000148660.16	chr10	75572259	75634343	-	75633600	75634796	7	H3K4me3	none	none	No Meth/Exp-	no change
PLAU	ENSG00000122861.11	chr10	75668935	75677255	+	75670696	75671379	8	Bivalent	Bivalent	none	No Meth/Exp+	no change
VCL	ENSG00000035403.12	chr10	75757872	75879918	+	75757484	75758227	8	H3K4me3	H3K4me3	H3K4me3	No Meth/Exp+	no change
LINC00857	ENSG00000237523.1	chr10	81967466	81979413	+	81966989	81967517	3	none	H3K27me3	none	Meth+/Exp-	Methylated
RP11-137H2.4	ENSG00000226659.1	chr10	82289353	82295698	-	82295501	82296192	4	none	none	H3K4me3	No Meth/Exp-	no change
NRG3	ENSG00000185737.8	chr10	83635070	84746935	+	83633820	83635729	6	Bivalent	Bivalent	Bivalent	No Meth/Exp-	no change
ACTA2	ENSG00000107796.8	chr10	90694831	90751147	-	90750293	90751108	6	Bivalent	H3K4me3	H3K4me3	No Meth/Exp+	no change
CPEB3	ENSG00000107864.10	chr10	93806449	94050844	-	94050423	94051412	9	H3K4me3	H3K4me3	H3K4me3	No Meth/Exp-	no change
KIF11	ENSG00000138160.4	chr10	94353043	94415150	+	94352667	94353159	7	H3K4me3	H3K4me3	H3K4me3	No Meth/Exp+	no change
CEP55	ENSG00000138180.11	chr10	95256389	95288849	+	95256133	95256562	8	H3K4me3	none	H3K4me3	No Meth/Exp+	no change
PLCE1	ENSG00000138193.10	chr10	95753746	96092580	+	95753347	95754201	3	Bivalent	Bivalent	Bivalent	No Meth/Exp+	no change
HELLS	ENSG00000119969.10	chr10	96305547	96373662	+	96305116	96305893	12	none	H3K4me3	H3K4me3	No Meth/Exp+	no change
PDLIM1	ENSG00000107438.4	chr10	96997329	97050781	-	97050185	97051124	6	none	Bivalent	H3K27me3	No Meth/Exp+	no change
AVPI1	ENSG00000119986.6	chr10	99437181	99447080	-	99446696	99447400	10	none	none	H3K4me3	No Meth/Exp-	no change
GOLGA7B	ENSG00000155265.6	chr10	99609996	99631337	+	99609425	99610116	9	none	H3K27me3	none	No Meth/Exp-	no change
CRTAC1	ENSG00000095713.9	chr10	99624757	99790585	-	99789614	99791320	10	Bivalent	Bivalent	H3K4me3	No Meth/Exp-	no change
CNNM1	ENSG00000119946.9	chr10	101088856	101154087	+	101089010	101090655	5	Bivalent	Bivalent	Bivalent	No Meth/Exp-	no change
SCD	ENSG00000099194.5	chr10	102106881	102124591	+	102106182	102107722	11	H3K4me3	H3K4me3	none	No Meth/Exp-	no change
INA	ENSG00000148798.5	chr10	105036920	105050108	+	105036628	105038084	10	Bivalent	Bivalent	Bivalent	Meth+/Exp-	Methylable
SFR1	ENSG00000156384.10	chr10	105881816	105886143	+	105881449	105881947	9	H3K4me3	H3K4me3	H3K4me3	No Meth/Exp-	no change
ADRA2A	ENSG00000150594.5	chr10	112836790	112840658	+	112835990	112839303	11	Bivalent	Bivalent	none	No Meth/Exp-	no change
ATRNL1	ENSG00000107518.12	chr10	116853124	117708503	+	116852261	116854094	8	Bivalent	none	none	No Meth/Exp-	no change
HSPA12A	ENSG00000165868.8	chr10	118430703	118502085	-	118500868	118502706	5	Bivalent	Bivalent	H3K4me3	No Meth/Exp-	no change
EMX2OS	ENSG00000229847.4	chr10	119232726	119304579	-	119301321	119305368	29	Bivalent	H3K27me3	Bivalent	No Meth/Exp-	no change
PRLHR	ENSG00000119973.3	chr10	120352916	120355160	-	120353692	120355821	14	Bivalent	H3K27me3	Bivalent	Meth+/Exp-	Methylable
FGFR2	ENSG00000066468.16	chr10	123237848	123357972	-	123356616	123358285	9	H3K4me3	none	none	No Meth/Exp-	no change
IKZF5	ENSG00000095574.7	chr10	124750322	124768333	-	124767758	124768897	12	Bivalent	H3K4me3	H3K4me3	No Meth/Exp-	no change
LHPP	ENSG00000107902.9	chr10	126150403	126306457	+	126150243	126150740	8	none	none	H3K4me3	No Meth/Exp-	no change
ADAM12	ENSG00000148848.10	chr10	127700950	128077024	-	128076155	128077482	12	Bivalent	Bivalent	H3K4me3	No Meth/Exp+	no change
C10orf90	ENSG00000154493.13	chr10	128113566	128359079	-	128193311	128193531	4	none	none	none	No Meth/Exp-	no change
MKI67	ENSG00000148773.8	chr10	129894923	129924649	-	129923813	129924962	8	none	none	none	No Meth/Exp+	no change
EBF3	ENSG00000108001.9	chr10	131633547	131762105	-	131761169	131771696	43	Bivalent	Bivalent	H3K27me3	Meth+/Exp+	Methylable
RP11-140A10.3	ENSG00000235010.1	chr10	133994729	133999466	-	133998912	134001500	17	Bivalent	none	H3K4me3	No Meth/Exp-	no change
RP11-288G11.3	ENSG00000234531.2	chr10	134596683	134598269	-	134597357	134602649	46	Bivalent	Bivalent	H3K4me3	Meth+/Exp-	Methylable
NKX6-2	ENSG00000148826.6	chr10	134598297	134599556	-	134597357	134602649	46	Bivalent	Bivalent	H3K4me3	Meth+/Exp-	Methylable
VENTX	ENSG00000151650.7	chr10	135050908	135055433	+	135048797	135052077	41	Bivalent	H3K27me3	H3K27me3	Meth+/Exp+	Methylable
PAOX	ENSG00000148832.10	chr10	135192695	135205198	+	135191594	135193307	23	Bivalent	none	H3K4me3	No Meth/Exp-	no change
MIR210HG	ENSG00000247095.2	chr11	565660	568457	-	567938	569461	7	none	Bivalent	H3K4me3	No Meth/Exp+	no change
CD151	ENSG00000177697.13	chr11	832843	839831	+	829284	833558	13	Bivalent	Bivalent	H3K4me3	Meth+/Exp+	Methylable
LSP1	ENSG00000130592.9	chr11	1874200	1913497	+	1892037	1892556	9	none	none	none	No Meth/Exp+	no change
KCNQ1DN	ENSG00000237941.2	chr11	2891263	2893335	+	2890388	2891337	25	none	none	H3K27me3	Meth+/Exp-	Methylable
PHLDA2	ENSG00000181649.5	chr11	2949503	2950685	-	2949788	2951756	28	Bivalent	Bivalent	none	Meth+/Exp+	Methylable
CNGA4	ENSG00000132259.8	chr11	6255995	6265659	+	6255768	6256179	7	H3K4me3	H3K4me3	H3K4me3	No Meth/Exp-	no change
PRKCDBP	ENSG00000170955.9	chr11	6340176	6341877	-	6340445	6341909	12	none	H3K27me3	H3K4me3	Meth+/Exp+	Methylated
APBB1	ENSG00000166313.14	chr11	6416355	6440644	-	6439863	6440732	12	none	none	H3K4me3	No Meth/Exp-	no change
RBMXL2	ENSG00000170748.5	chr11	7110165	7112379	+	7110132	7111376	4	none	none	none	Meth+/Exp-	Methylated
SYT9	ENSG00000170743.12	chr11	7260009	7490273	+	7272757	7274235	10	Bivalent	Bivalent	H3K4me3	No Meth/Exp-	no change
CYB5R2	ENSG00000166394.10	chr11	7686331	7698453	-	7694711	7695685	7	none	H3K27me3	none	Meth+/Exp-	Methylable
RP11-379P15.1	ENSG00000246820.2	chr11	8190714	8200450	+	8190226	8190671	4	none	none	H3K4me3	No Meth/Exp+	no change
RP11-467K18.2	ENSG00000253973.2	chr11	9025709	9086701	+	9025095	9026315	5	Bivalent	Bivalent	none	Meth+/Exp-	Methylable
WEE1	ENSG00000166483.6	chr11	9595228	9615004	+	9594346	9596536	16	H3K4me3	H3K4me3	Bivalent	No Meth/Exp+	no change
RNF141	ENSG00000110315.2	chr11	10533225	10562777	-	10562225	10562942	10	none	none	H3K4me3	No Meth/Exp-	no change
MRVI1-AS1	ENSG00000177112.3	chr11	10562819	10621479	+	10562225	10562942	10	none	none	H3K4me3	No Meth/Exp-	no change
FAR1	ENSG00000197601.8	chr11	13690217	13753893	+	13689588	13690724	11	H3K4me3	H3K4me3	H3K4me3	No Meth/Exp-	no change
ABCC8	ENSG00000006071.7	chr11	17414432	17498449	-	17497463	17498626	12	Bivalent	Bivalent	none	No Meth/Exp-	no change
USH1C	ENSG00000006611.11	chr11	17515442	17565963	-	17565766	17566052	8	none	H3K27me3	none	Meth+/Exp-	Methylable
SVIP	ENSG00000198168.4	chr11	22835345	22851845	-	22850765	22851367	4	Bivalent	H3K4me3	H3K4me3	No Meth/Exp-	no change
RP11-17A1.3	ENSG00000246225.2	chr11	22850926	22966939	+	22850765	22851367	4	Bivalent	H3K4me3	H3K4me3	No Meth/Exp-	no change
DEPDC7	ENSG00000121690.5	chr11	33037410	33055128	+	33037206	33037917	7	Bivalent	none	H3K4me3	No Meth/Exp-	no change
LMO2	ENSG00000135363.7	chr11	33880122	33913836	-	33890357	33891495	6	Bivalent	Bivalent	H3K4me3	No Meth/Exp+	no change
CD44	ENSG00000026508.12	chr11	35160417	35253949	+	35160375	35161000	7	Bivalent	Bivalent	Bivalent	No Meth/Exp+	no change
FJX1	ENSG00000179431.5	chr11	35639735	35642419	+	35639629	35641485	10	Bivalent	H3K4me3	H3K4me3	No Meth/Exp+	no change
PRR5L	ENSG00000135362.9	chr11	36317838	36486754	+	36397926	36399398	4	Bivalent	H3K4me3	none	No Meth/Exp-	no change
C11orf96	ENSG00000187479.4	chr11	43946892	43965888	+	43963626	43966048	15	Bivalent	Bivalent	none	No Meth/Exp+	no change
MDK	ENSG00000110492.11	chr11	46402306	46405375	+	46402624	46404139	6	H3K4me3	H3K4me3	H3K4me3	No Meth/Exp+	no change
RP11-707M1.7	ENSG00000254487.2	chr11	49839330	49847105	+	49839280	49839568	2	none	none	none	No Meth/Exp-	no change
SLC43A3	ENSG00000134802.13	chr11	57174427	57195053	-	57194340	57194650	3	Bivalent	none	H3K4me3	No Meth/Exp+	no change
FAM111B	ENSG00000189057.6	chr11	58874658	58894883	+	58873889	58874486	3	Bivalent	H3K4me3	H3K4me3	No Meth/Exp+	no change
FAM111A	ENSG00000166801.11	chr11	58910221	58922512	+	58910127	58910584	8	none	H3K4me3	H3K4me3	No Meth/Exp+	no change
BEST1	ENSG00000167995.11	chr11	61717293	61732987	+	61722744	61723483	3	Bivalent	none	H3K4me3	No Meth/Exp-	no change
HRASLS5	ENSG00000168004.5	chr11	63228876	63258666	-	63258378	63258804	8	none	H3K27me3	H3K4me3	No Meth/Exp-	no change
PLA2G16	ENSG00000176485.6	chr11	63340667	63384355	-	63381143	63382096	8	none	Bivalent	H3K4me3	No Meth/Exp-	no change
RTN3	ENSG00000133318.9	chr11	63448918	63527363	+	63448704	63449386	7	H3K4me3	H3K4me3	H3K4me3	No Meth/Exp-	no change
RP11-21A7A.2	ENSG00000256824.1	chr11	63803442	63871125	+	63803375	63804365	6	Bivalent	Bivalent	H3K4me3	No Meth/Exp-	no change
PPP1R14B	ENSG00000173457.6	chr11	64011956	64014413	-	64013772	64015341	9	H3K4me3	H3K4me3	H3K4me3	No Meth/Exp+	no change
CDCA5	ENSG00000146670.5	chr11	64833772	64851636	-	64851302	64851828	12	H3K4me3	H3K4me3	H3K4me3	No Meth/Exp+	no change
AP003068.9	ENSG00000254501.1	chr11	64878186	64879167	-	64879046	64880413	13	H3K4me3	H3K4me3	H3K4me3	No Meth/Exp-	no change
CDC42EP2	ENSG00000149798.3	chr11	65082289	65089900	+	65081937	65083333	7	H3K4me3	H3K4me3	H3K4me3	No Meth/Exp-	no change
EFEMP2	ENSG00000172638.8	chr11	65633912	65641063	-	65639835	65641374	10	none	H3K4me3	H3K4me3	No Meth/Exp+	no change
FOSL1	ENSG00000175592.4	chr11	65659520	65668044	-	65666676	65668209	8	Bivalent	Bivalent	none	No Meth/Exp+	no change
TMEM151A	ENSG00000179292.4	chr11	66059341	66064135	+	66059287	66059935	3	Bivalent	none	none	No Meth/Exp-	no change
NPAS4	ENSG00000174576.4	chr11	66188475	66194178	+	66188130	66189397	7	Bivalent	H3K27me3	H3K4me3	No Meth/Exp-	no change
PELI3	ENSG00000174516.10	chr11	66234216	66244808	+	66233899	66234964	9	none	H3K4me3	H3K4me3	No Meth/Exp-	no change
RHOD	ENSG00000173156.2	chr11	66824289	66839484	+	66824118	66824621	7	Bivalent	none	none	Meth+/Exp+	Methylable
CLCF1	ENSG00000175505.9	chr11	67131639	67141648	-	67139887	67141146	4	Bivalent	H3K4me3	H3K4me3	No Meth/Exp+	no change
TCIRG1	ENSG00000110719.5	chr11	67806483	67818362	+	67806251	67806611	7	H3K4me3	none	H3K4me3	No Meth/Exp+	no change
ANO1	ENSG00000131620.13	chr11	69924408	70035634	+	69924338	69925197	5	none	H3K27me3	H3K27me3	Meth+/Exp+	Methylable
PLEKHB1	ENSG00000021300.9	chr11	73357223	73373864	+	73371800	73372632	3	none	none	H3K4me3	No Meth/Exp-	no change
MRPL48	ENSG00000175581.9	chr11	73498361	73576178	+	73498947	73499265	2	H3K4me3	H3K4me3	H3K4me3	No Meth/Exp-	no change
P4HA3	ENSG00000149380.7	chr11	73946846	74022702	-	74022428	74022703	3	Bivalent	Bivalent	none	Meth+/Exp+	Methylated
KCNE3	ENSG00000175538.6	chr11	74165886	74178774	-	74178175	74178801	7	Bivalent	H3K27me3	H3K4me3	No Meth/Exp+	no change
ARRB1	ENSG00000137486.12	chr11	74975226	75062873	-	75062224	75062977	2	none	H3K4me3	H3K4me3	No Meth/Exp-	no change
LRRC32	ENSG00000137507.7	chr11	76368568	76381791	-	76381449	76382295	7	Bivalent	Bivalent	Bivalent	No Meth/Exp+	no change
TSKU	ENSG00000182704.6	chr11	76493295	76509198	+	76494416	76495672	4	H3K4me3	H3K4me3	H3K4me3	No Meth/Exp+	no change
RP11-21L23.3	ENSG00000255100.1	chr11	76493625	76494106	-	76494416	76495672	4	H3K4me3	H3K4me3	H3K4me3	No Meth/Exp+	no change
ACER3	ENSG00000078124.7	chr11	76571911	76737841	+	76571963	76572291	3	H3K4me3	H3K4me3	H3K4me3	No Meth/Exp-	no change
C11orf82	ENSG00000165490.8	chr11	82611017	82669319	+	82612259	82612844	9	H3K4me3	H3K4me3	H3K4me3	No Meth/Exp+	no change
DLG2	ENSG00000150672.12	chr11	83166055	85338966	-	85339343	85339629	6	H3K4me3	H3K4me3	H3K4me3	No Meth/Exp-	no change
PRSS23	ENSG00000150687.7	chr11	86502101	86663952	+	86511184	86511889	5	Bivalent	H3K4me3	H3K4me3	No Meth/Exp+	no change
CCDC67	ENSG00000165325.9	chr11	93063137	93171653	+	93063598	93064076	4	Bivalent	none	none	Meth+/Exp-	Methylable
VSTM5	ENSG00000214376.5	chr11	93551398	93583697	-	93583374	93583717	4	none	none	none	No Meth/Exp-	no change
RP11-867G2.2	ENSG00000257057.1	chr11	94245747	94265289	+	94245546	94245891	3	Bivalent	Bivalent	H3K4me3	No Meth/Exp-	no change
ENDOD1	ENSG00000149218.4	chr11	94822974	94865809	+	94822597	94823611	6	Bivalent	none	H3K4me3	No Meth/Exp-	no change
ARHGAP42	ENSG00000165895.13	chr11	100558384	100862668	+	100557923	100558401	5	H3K4me3	none	H3K4me3	No Meth/Exp+	no change
KIAA1377	ENSG00000110318.9	chr11	101785746	101871789	+	101785594	101786128	8	H3K4me3	none	H3K4me3	No Meth/Exp-	no change
RP11-315O6.1	ENSG00000255337.1	chr11	102323650	102332739	+	102322529	102323762	5	Bivalent	none	H3K4me3	No Meth/Exp-	no change
KBTBD3	ENSG00000182359.10	chr11	105921825	105948492	-	105948097	105948830	19	H3K4me3	H3K4me3	H3K4me3	No Meth/Exp-	no change
EXPH5	ENSG00000110723.7	chr11	108376158	108464465	-	108463598	108464103	5	Bivalent	Bivalent	none	No Meth/Exp-	no change
BTG4	ENSG00000137707.9	chr11	111338251	111383079	-	111383168	111383892	8	Bivalent	H3K27me3	none	Meth+/Exp-	Methylable
C11orf88	ENSG00000183644.9	chr11	111385510	111407756	+	111385337	111385712	6	Bivalent	H3K27me3	none	Meth+/Exp-	Methylable
LAYN	ENSG00000204381.7	chr11	111411005	111432264	+	111410932	111412199	10	Bivalent	none	Bivalent	No Meth/Exp-	no change
SIK3	ENSG00000160584.11	chr11	116714118	116969153	-	116968849	116969512	4	H3K4me3	H3K4me3	H3K4me3	No Meth/Exp-	no change
BACE1	ENSG00000186318.12	chr11	117156402	117186975	-	117186344	117186979	4	H3K4me3	H3K4me3	H3K4me3	No Meth/Exp-	no change
DSCAML1	ENSG00000177103.9	chr11	117298489	117688240	-	117666634	117668141	10	Bivalent	H3K27me3	H3K4me3	No Meth/Exp-	no change
PVRL1	ENSG00000110400.6	chr11	119494120	119599794	-	119598382	119600157	9	H3K4me3	none	none	No Meth/Exp-	no change
CTD-2523D13.2	ENSG00000254854.1	chr11	119600293	119610333	+	119598382	119600157	9	H3K4me3	none	none	No Meth/Exp-	no change
AP000679.2	ENSG00000176984.2	chr11	120039685	120042387	+	120039601	120040210	5	Bivalent	Bivalent	H3K4me3	Meth+/Exp-	Methylable
POU2F3	ENSG00000137709.5	chr11	120107349	120190653	+	120110497	120110719	4	Bivalent	H3K27me3	H3K27me3	No Meth/Exp+	no change
FEZ1	ENSG00000149557.8	chr11	125315646	125366213	-	125365137	125366319	8	Bivalent	H3K4me3	H3K4me3	No Meth/Exp-	no change
AP000708.1	ENSG00000255537.1	chr11	125365110	125369424	+	125365137	125366319	8	Bivalent	H3K4me3	H3K4me3	No Meth/Exp-	no change
CHEK1	ENSG00000149554.8	chr11	125495036	125546150	+	125495233	125495866	4	H3K4me3	H3K4me3	H3K4me3	No Meth/Exp+	no change
ETS1	ENSG00000134954.10	chr11	128328656	128457453	-	128391712	128392611	5	none	H3K4me3	H3K4me3	No Meth/Exp+	no change
RP11-121M22.1	ENSG00000175773.8	chr11	130184888	130263688	+	130183948	130184668	3	H3K4me3	H3K4me3	H3K4me3	No Meth/Exp-	no change
ADAMTS8	ENSG00000134917.9	chr11	130274820	130298888	-	130297401	130298517	7	Bivalent	Bivalent	H3K4me3	No Meth/Exp-	no change
ADAMTS15	ENSG00000166106.2	chr11	130318869	130346532	+	130318234	130320198	11	Bivalent	Bivalent	none	Meth+/Exp+	Methylable
RP11-283I3.2	ENSG00000256577.1	chr12	312808	314189	+	312591	313331	3	Bivalent	Bivalent	H3K4me3	No Meth/Exp-	no change
ADIPOR2	ENSG00000006831.9	chr12	1797740	1897844	+	1799874	1800739	9	H3K4me3	H3K4me3	H3K4me3	No Meth/Exp-	no change
FOXM1	ENSG00000111206.8	chr12	2966847	2986206	-	2985978	2986639	6	H3K4me3	H3K4me3	H3K4me3	No Meth/Exp+	no change
TEAD4	ENSG00000197905.4	chr12	3068496	3149839	+	3067960	3069444	9	H3K4me3	H3K4me3	Bivalent	No Meth/Exp+	no change
KCNA6	ENSG00000151079.6	chr12	4918342	4960277	+	4918273	4919657	8	Bivalent	Bivalent	H3K4me3	No Meth/Exp-	no change
KCNA5	ENSG00000130037.3	chr12	5153085	5155949	+	5153012	5154346	7	Bivalent	H3K27me3	none	Meth+/Exp-	Methylable
VAMP1	ENSG00000139190.12	chr12	6571403	6580153	-	6579555	6580429	11	H3K4me3	H3K4me3	H3K4me3	No Meth/Exp-	no change
CDCA3	ENSG00000111665.7	chr12	6953957	6961230	-	6961005	6961873	10	H3K4me3	H3K4me3	H3K4me3	No Meth/Exp+	no change
DDX12P	ENSG00000214826.4	chr12	9570309	9600825	-	9600415	9601259	13	H3K4me3	H3K4me3	H3K4me3	No Meth/Exp+	no change
YBX3	ENSG00000060138.8	chr12	10851683	10875911	-	10875137	10876180	6	H3K4me3	Bivalent	none	No Meth/Exp+	no change
GPRC5A	ENSG00000013588.5	chr12	13043716	13070871	+	13044042	13044667	6	Bivalent	Bivalent	none	No Meth/Exp+	no change
RERG	ENSG00000134533.2	chr12	15260717	15501609	-	15373986	15374514	6	Bivalent	none	H3K4me3	No Meth/Exp-	no change
PDE3A	ENSG00000172572.6	chr12	20522179	20837315	+	20521616	20523122	9	Bivalent	none	none	No Meth/Exp+	no change
C12orf39	ENSG00000134548.5	chr12	21679241	21690311	+	21680408	21680982	5	Bivalent	Bivalent	H3K4me3	No Meth/Exp-	no change
RP11-946L16.1	ENSG00000257258.1	chr12	29296129	29301608	-	29302034	29302954	6	Bivalent	Bivalent	H3K4me3	No Meth/Exp-	no change
TSPAN11	ENSG00000110900.10	chr12	31079362	31149534	+	31079243	31079878	3	Bivalent	none	none	No Meth/Exp+	no change
DDX11	ENSG00000013573.12	chr12	31226779	31257725	+	31226343	31227186	9	H3K4me3	H3K4me3	H3K4me3	No Meth/Exp+	no change
FAM60A	ENSG00000139146.9	chr12	31433518	31479992	-	31476717	31479466	16	H3K4me3	H3K4me3	none	No Meth/Exp+	no change
AMN1	ENSG00000151743.6	chr12	31824071	31882108	-	31881630	31882461	10	none	H3K4me3	H3K4me3	No Meth/Exp-	no change
PKP2	ENSG00000057294.9	chr12	32943679	33049774	-	33049301	33050098	4	none	Bivalent	Bivalent	Meth+/Exp-	Methylable
RP11-313F23.4	ENSG00000255652.2	chr12	34343972	34371788	-	34371627	34372304	3	none	none	Bivalent	Meth+/Exp-	Methylable
CNTN1	ENSG00000018236.10	chr12	41086244	41466220	+	41086522	41087102	5	Bivalent	none	none	No Meth/Exp-	no change
RP11-76E16.2	ENSG00000257674.1	chr12	42680713	42682362	+	42680607	42680889	3	none	none	none	No Meth/Exp+	no change
ANO6	ENSG00000177119.11	chr12	45609770	45834187	+	45609713	45610752	11	H3K4me3	H3K4me3	H3K4me3	No Meth/Exp+	no change
VDR	ENSG00000111424.6	chr12	48235320	48336831	-	48298645	48299537	8	Bivalent	Bivalent	none	No Meth/Exp+	no change
RP11-370I10.6	ENSG00000257735.1	chr12	48744728	48836194	+	48744318	48745099	3	none	H3K4me3	H3K4me3	No Meth/Exp-	no change
DHH	ENSG00000139549.2	chr12	49483204	49488602	-	49487963	49488202	2	Bivalent	none	none	No Meth/Exp+	no change
PRPH	ENSG00000135406.9	chr12	49687035	49692465	+	49688873	49691360	9	Bivalent	H3K27me3	none	Meth+/Exp+	Methylated
TROAP	ENSG00000135451.8	chr12	49717019	49725514	+	49716630	49717018	9	H3K4me3	H3K4me3	H3K4me3	No Meth/Exp+	no change
FAIM2	ENSG00000135472.4	chr12	50260679	50298000	-	50297580	50297988	5	Bivalent	Bivalent	H3K4me3	No Meth/Exp-	no change
GALNT6	ENSG00000139629.11	chr12	51745031	51786651	-	51785279	51785821	6	none	Bivalent	none	No Meth/Exp-	no change
RP11-845M18.6	ENSG00000257829.1	chr12	52700400	52702155	-	52701962	52702560	5	Bivalent	H3K27me3	H3K4me3	No Meth/Exp-	no change
KRT83	ENSG00000170523.3	chr12	52708085	52715182	-	52714800	52715051	3	H3K27me3	H3K27me3	none	No Meth/Exp-	no change
KRT18	ENSG00000111057.6	chr12	53342655	53346685	+	53342805	53343162	2	H3K4me3	H3K27me3	H3K27me3	No Meth/Exp+	no change
SPRYD3	ENSG00000167778.4	chr12	53458388	53473204	-	53472814	53473491	10	H3K4me3	H3K4me3	H3K4me3	No Meth/Exp-	no change
ESPL1	ENSG00000135476.7	chr12	53662083	53687427	+	53661928	53662429	3	none	H3K4me3	none	No Meth/Exp+	no change
SP7	ENSG00000170374.4	chr12	53720362	53739099	-	53738546	53738986	4	Bivalent	Bivalent	H3K4me3	No Meth/Exp-	no change
HOXC-AS5	ENSG00000249641.2	chr12	54329112	54333427	-	54332805	54333731	6	none	none	H3K27me3	Meth+/Exp+	Methylable
HOXC13	ENSG00000123364.3	chr12	54332535	54340328	+	54332805	54333731	6	none	none	H3K27me3	Meth+/Exp+	Methylable
HOXC11	ENSG00000123388.4	chr12	54366910	54371427	+	54366815	54369103	13	none	none	H3K27me3	Meth+/Exp+	Methylated
HOXC-AS3	ENSG00000251151.2	chr12	54375293	54379303	-	54378696	54380102	10	H3K27me3	none	none	No Meth/Exp+	no change
HOXC10	ENSG00000180818.4	chr12	54378849	54384063	+	54378696	54380102	10	H3K27me3	none	none	No Meth/Exp+	no change
HOXC-AS1	ENSG00000250451.1	chr12	54392806	54393794	-	54393374	54394648	17	none	none	H3K27me3	No Meth/Exp+	no change
HOXC8	ENSG00000037965.4	chr12	54402832	54407570	+	54402682	54403347	10	none	none	H3K27me3	No Meth/Exp+	no change
AC012531.25	ENSG00000260597.1	chr12	54413694	54416373	+	54412990	54413346	3	Bivalent	none	H3K27me3	Meth+/Exp+	Methylated
RP11-834C11.4	ENSG00000250742.1	chr12	54519882	54526627	+	54519768	54520457	4	Bivalent	none	Bivalent	No Meth/Exp+	no change
PPP1R1A	ENSG00000135447.12	chr12	54969171	54982443	-	54981933	54982591	4	Bivalent	none	Bivalent	No Meth/Exp-	no change
CDK2	ENSG00000123374.6	chr12	56360553	56366568	+	56360467	56360909	6	H3K4me3	H3K4me3	H3K4me3	No Meth/Exp+	no change
ERBB3	ENSG00000065361.10	chr12	56473641	56497289	+	56472792	56474393	12	none	Bivalent	none	Meth+/Exp-	Methylable
TIMELESS	ENSG00000111602.7	chr12	56810903	56843187	-	56842846	56843255	3	H3K4me3	H3K4me3	H3K4me3	No Meth/Exp+	no change
SHMT2	ENSG00000182199.6	chr12	57623110	57628718	+	57623420	57623903	8	none	none	H3K4me3	No Meth/Exp+	no change
PPM1H	ENSG00000111110.7	chr12	63037762	63328817	-	63328143	63329135	10	H3K4me3	Bivalent	H3K4me3	No Meth/Exp-	no change
AVPR1A	ENSG00000166148.2	chr12	63539014	63544722	-	63543636	63544967	5	Bivalent	Bivalent	Bivalent	Meth+/Exp+	Methylated
PABPC1P4	ENSG00000255642.1	chr12	64215801	64217675	+	64215499	64215990	3	none	none	none	Meth+/Exp-	Methylated
HMGA2	ENSG00000149948.9	chr12	66217911	66360075	+	66217627	66220181	10	H3K4me3	H3K4me3	Bivalent	No Meth/Exp+	no change
KCNMB4	ENSG00000135643.4	chr12	70760056	70828072	+	70759437	70761052	8	Bivalent	Bivalent	none	No Meth/Exp-	no change
LGR5	ENSG00000139292.8	chr12	71833550	71980090	+	71833192	71834389	7	Bivalent	Bivalent	none	No Meth/Exp-	no change
PHLDA1	ENSG00000139289.9	chr12	76419227	76427712	-	76424634	76426316	7	none	H3K4me3	H3K4me3	No Meth/Exp+	no change
CSRP2	ENSG00000175183.5	chr12	77252495	77272840	-	77272632	77273216	7	H3K4me3	H3K4me3	H3K4me3	No Meth/Exp+	no change
E2F7	ENSG00000165891.11	chr12	77415027	77459360	-	77458947	77459942	13	H3K4me3	H3K4me3	H3K4me3	No Meth/Exp+	no change
RP1-34H18.1	ENSG00000231121.2	chr12	77718421	77966055	+	77718453	77719440	5	Bivalent	Bivalent	H3K4me3	No Meth/Exp-	no change
PPFIA2	ENSG00000139220.12	chr12	81652045	82153332	-	82152320	82152674	4	Bivalent	none	H3K4me3	No Meth/Exp-	no change
TMTC2	ENSG00000179104.4	chr12	83080659	83528649	+	83080662	83081646	7	Bivalent	H3K4me3	H3K4me3	No Meth/Exp-	no change
SOCS2	ENSG00000120833.9	chr12	93963590	93977263	+	93963963	93967395	16	Bivalent	H3K4me3	Bivalent	No Meth/Exp+	no change
TMCC3	ENSG00000057704.6	chr12	94960900	95044338	-	95043551	95044312	4	Bivalent	Bivalent	H3K4me3	No Meth/Exp-	no change
USP44	ENSG00000136014.7	chr12	95910336	95945266	-	95941906	95942979	7	H3K4me3	Bivalent	none	Meth+/Exp-	Methylable
HAL	ENSG00000084110.6	chr12	96366440	96390143	-	96389405	96389675	3	none	none	none	No Meth/Exp+	no change
IKBIP	ENSG00000166130.10	chr12	99007183	99038891	-	99038272	99039483	18	H3K4me3	H3K4me3	H3K4me3	No Meth/Exp+	no change
GAS2L3	ENSG00000139354.6	chr12	100967461	101022064	+	100967293	100967845	6	Bivalent	H3K4me3	H3K4me3	No Meth/Exp+	no change
ANO4	ENSG00000151572.12	chr12	101111304	101522419	+	101109863	101111622	4	Bivalent	Bivalent	H3K27me3	Meth+/Exp-	Methylable
DRAM1	ENSG00000136048.9	chr12	102271129	102405908	+	102270754	102271801	6	Bivalent	Bivalent	H3K4me3	No Meth/Exp+	no change
PARPBP	ENSG00000185480.7	chr12	102513956	102591298	+	102513668	102514076	8	H3K4me3	H3K4me3	H3K4me3	No Meth/Exp+	no change
C12orf42	ENSG00000179088.10	chr12	103631369	103889749	-	103889148	103889843	8	Bivalent	none	H3K4me3	No Meth/Exp-	no change
NUAK1	ENSG00000074590.9	chr12	106457118	106533811	-	106532106	106533696	7	H3K4me3	H3K4me3	H3K4me3	No Meth/Exp-	no change
TCP11L2	ENSG00000166046.6	chr12	106695707	106740793	+	106696232	106697199	5	H3K4me3	none	H3K4me3	No Meth/Exp-	no change
FAM222A	ENSG00000139438.5	chr12	110152033	110208312	+	110151327	110152758	9	none	none	H3K4me3	No Meth/Exp-	no change
TRPV4	ENSG00000111199.6	chr12	110220890	110271212	-	110271000	110271582	5	none	Bivalent	none	No Meth/Exp+	no change
GLTP	ENSG00000139433.5	chr12	110288748	110318293	-	110318011	110318778	4	none	none	H3K4me3	No Meth/Exp-	no change
C12orf76	ENSG00000174456.9	chr12	110465872	110511491	-	110486083	110486574	5	H3K4me3	H3K4me3	H3K4me3	No Meth/Exp-	no change
NOS1	ENSG00000089250.14	chr12	117645947	117889975	-	117798076	117799448	8	Bivalent	H3K27me3	Bivalent	No Meth/Exp-	no change
KSR2	ENSG00000171435.9	chr12	117890817	118406788	-	118406590	118407364	5	Bivalent	Bivalent	none	No Meth/Exp-	no change
KNTC1	ENSG00000184445.7	chr12	123011793	123110943	+	123011261	123011765	11	H3K4me3	H3K4me3	H3K4me3	No Meth/Exp+	no change
HIP1R	ENSG00000130787.9	chr12	123319000	123347507	+	123319750	123321043	8	Bivalent	H3K4me3	H3K4me3	No Meth/Exp-	no change
ANKRD26P3	ENSG00000237636.2	chr13	19864733	19918965	-	19918585	19919221	4	none	none	none	Meth+/Exp-	Methylated
GJA3	ENSG00000121743.3	chr13	20712394	20735188	-	20735043	20736157	12	Bivalent	Bivalent	Bivalent	Meth+/Exp+	Methylated
GJB6	ENSG00000121742.11	chr13	20796110	20806534	-	20806016	20806867	9	Bivalent	H3K27me3	H3K27me3	No Meth/Exp-	no change
SKA3	ENSG00000165480.11	chr13	21727734	21750741	-	21750287	21751332	13	H3K4me3	H3K4me3	H3K4me3	No Meth/Exp+	no change
ZDHHC20	ENSG00000180776.11	chr13	21950263	22033509	-	22032862	22033730	8	H3K4me3	none	H3K4me3	No Meth/Exp-	no change
TNFRSF19	ENSG00000127863.11	chr13	24144509	24250232	+	24152899	24154140	12	Bivalent	none	H3K4me3	No Meth/Exp+	no change
AMER2	ENSG00000165566.11	chr13	25735822	25746426	-	25743998	25746127	10	Bivalent	Bivalent	H3K4me3	No Meth/Exp-	no change
RP11-271M24.2	ENSG00000260509.2	chr13	25874262	25875576	-	25874994	25876200	12	H3K4me3	H3K4me3	H3K4me3	No Meth/Exp-	no change
SHISA2	ENSG00000180730.4	chr13	26618735	26625169	-	26624725	26626265	9	Bivalent	none	Bivalent	Meth+/Exp-	Methylable
RASL11A	ENSG00000122035.6	chr13	27844464	27847827	+	27844658	27845525	3	Bivalent	H3K4me3	H3K4me3	No Meth/Exp-	no change
FLT3	ENSG00000122025.10	chr13	28577411	28674729	-	28674227	28675170	4	Bivalent	Bivalent	none	Meth+/Exp-	Methylable
BRCA2	ENSG00000139618.10	chr13	32889611	32973805	+	32889533	32889900	4	H3K4me3	H3K4me3	H3K4me3	No Meth/Exp+	no change
CCDC169	ENSG00000242715.3	chr13	36801182	36871977	-	36871667	36872059	6	H3K4me3	H3K4me3	H3K4me3	No Meth/Exp+	no change
FREM2	ENSG00000150893.9	chr13	39261266	39460074	+	39261236	39262299	6	Bivalent	H3K4me3	Bivalent	No Meth/Exp+	no change
RGCC	ENSG00000102760.12	chr13	42031695	42045018	+	42030913	42032667	8	Bivalent	Bivalent	none	Meth+/Exp-	Methylable
AKAP11	ENSG00000023516.7	chr13	42846289	42897396	+	42845853	42846807	6	H3K4me3	H3K4me3	H3K4me3	No Meth/Exp-	no change
LACC1	ENSG00000179630.6	chr13	44453420	44468068	+	44453207	44454295	13	Bivalent	Bivalent	H3K4me3	Meth+/Exp-	Methylable
CPB2-AS1	ENSG00000235903.3	chr13	46626941	46687467	+	46626454	46627019	10	H3K4me3	H3K4me3	H3K4me3	No Meth/Exp-	no change
FAM124A	ENSG00000150510.11	chr13	51796503	51858377	+	51796492	51796888	2	none	Bivalent	H3K4me3	No Meth/Exp-	no change
LECT1	ENSG00000136110.8	chr13	53277399	53313947	-	53313127	53314045	4	Bivalent	H3K27me3	Bivalent	Meth+/Exp-	Methylable
DIAPH3	ENSG00000139734.13	chr13	60239717	60738121	-	60737660	60738285	8	H3K4me3	H3K4me3	H3K4me3	No Meth/Exp+	no change
PCDH9	ENSG00000184226.10	chr13	66876967	67804468	-	67804593	67805459	8	none	H3K4me3	H3K4me3	No Meth/Exp-	no change
SLAIN1	ENSG00000139737.17	chr13	78272023	78338377	+	78271801	78272906	12	none	H3K4me3	H3K4me3	No Meth/Exp-	no change
POU4F1	ENSG00000152192.6	chr13	79172497	79177673	-	79175610	79177985	15	Bivalent	Bivalent	Bivalent	Meth+/Exp+	Methylable
NDFIP2	ENSG00000102471.9	chr13	80055287	80130210	+	80055066	80055713	9	H3K4me3	none	H3K4me3	No Meth/Exp-	no change
DOCK9	ENSG00000088387.13	chr13	99445741	99738879	-	99738331	99740225	5	Bivalent	Bivalent	H3K4me3	No Meth/Exp-	no change
TMTC4	ENSG00000125247.11	chr13	101256181	101327347	-	101326329	101327723	10	none	none	H3K4me3	No Meth/Exp-	no change
NALCN	ENSG00000102452.11	chr13	101706130	102068843	-	102068116	102069258	12	Bivalent	none	H3K4me3	No Meth/Exp-	no change
COL4A1	ENSG00000187498.10	chr13	110801318	110959496	-	110958891	110960590	10	Bivalent	H3K4me3	Bivalent	No Meth/Exp+	no change
COL4A2	ENSG00000134871.13	chr13	110958159	111165374	+	110958891	110960590	10	Bivalent	H3K4me3	Bivalent	No Meth/Exp+	no change
RAB20	ENSG00000139832.3	chr13	111175417	111214080	-	111213589	111214477	8	none	Bivalent	none	No Meth/Exp+	no change
ATP11A-AS1	ENSG00000232684.1	chr13	113399763	113409007	-	113410004	113410362	3	none	none	none	No Meth/Exp-	no change
F7	ENSG00000057593.9	chr13	113760105	113774995	+	113761566	113765534	10	H3K27me3	none	none	No Meth/Exp-	no change
KLHL33	ENSG00000185271.6	chr14	20896970	20903801	-	20903395	20903720	4	none	H3K27me3	H3K4me3	Meth+/Exp-	Methylated
RP11-998D10.7	ENSG00000258714.2	chr14	21558546	21560491	+	21558547	21561443	10	H3K4me3	none	none	Meth+/Exp+	Methylable
MMP14	ENSG00000157227.8	chr14	23305766	23318236	+	23305893	23307013	5	none	none	none	No Meth/Exp+	no change
AJUBA	ENSG00000129474.11	chr14	23440383	23451851	-	23449886	23452174	12	Bivalent	H3K4me3	Bivalent	No Meth/Exp+	no change
RP11-298I3.4	ENSG00000258457.1	chr14	23451907	23468287	+	23449886	23452174	12	Bivalent	H3K4me3	Bivalent	No Meth/Exp+	no change
STXBP6	ENSG00000168952.11	chr14	25278862	25519503	-	25518424	25519612	3	Bivalent	none	H3K4me3	No Meth/Exp-	no change
CFL2	ENSG00000165410.10	chr14	35179593	35184029	-	35183385	35184196	6	H3K4me3	none	H3K4me3	No Meth/Exp-	no change
SLC25A21	ENSG00000183032.6	chr14	37147636	37642071	-	37641232	37641879	5	H3K4me3	H3K4me3	none	Meth+/Exp-	Methylable
SLC25A21-AS1	ENSG00000258708.1	chr14	37641093	37643016	+	37641232	37641879	5	H3K4me3	H3K4me3	none	Meth+/Exp-	Methylable
MIPOL1	ENSG00000151338.14	chr14	37667118	38021566	+	37666686	37667493	6	H3K4me3	H3K4me3	H3K4me3	Meth+/Exp-	Methylated
LRR1	ENSG00000165501.12	chr14	50065415	50081390	+	50065184	50066027	9	H3K4me3	H3K4me3	H3K4me3	No Meth/Exp+	no change
POLE2	ENSG00000100479.8	chr14	50110273	50155140	-	50154754	50155239	8	H3K4me3	H3K4me3	H3K4me3	No Meth/Exp+	no change
KLHDC1	ENSG00000197776.3	chr14	50159823	50219870	+	50159667	50160424	10	Bivalent	H3K4me3	H3K4me3	No Meth/Exp-	no change
PYGL	ENSG00000100504.12	chr14	51324609	51411454	-	51410614	51411464	7	none	Bivalent	H3K4me3	No Meth/Exp+	no change
ABHD12B	ENSG00000131969.10	chr14	51338878	51371688	+	51338712	51339146	3	Bivalent	H3K27me3	H3K4me3	No Meth/Exp-	no change
CDKN3	ENSG00000100526.15	chr14	54863567	54886936	+	54863423	54864254	12	H3K4me3	H3K4me3	H3K4me3	No Meth/Exp+	no change
LGALS3	ENSG00000131981.11	chr14	55590828	55612126	+	55595697	55596692	7	Bivalent	none	none	No Meth/Exp+	no change
DLGAP5	ENSG00000126787.8	chr14	55614830	55658396	-	55658232	55658550	3	H3K4me3	H3K4me3	H3K4me3	No Meth/Exp+	no change
SIX4	ENSG00000100625.8	chr14	61176246	61191066	-	61188116	61190772	13	H3K4me3	H3K4me3	none	No Meth/Exp+	no change
HSPA2	ENSG00000126803.8	chr14	65002623	65009955	+	65006874	65009197	17	none	none	none	Meth+/Exp-	Methylated
PLEKHG3	ENSG00000126822.11	chr14	65170820	65213610	+	65170876	65172007	8	Bivalent	none	H3K4me3	No Meth/Exp-	no change
FUT8	ENSG00000033170.12	chr14	65877310	66210839	+	65878486	65880370	9	H3K4me3	H3K4me3	H3K4me3	No Meth/Exp-	no change
PLEK2	ENSG00000100558.4	chr14	67853700	67878917	-	67878534	67879167	6	Bivalent	none	none	Meth+/Exp+	Methylable
ACTN1-AS1	ENSG00000259062.1	chr14	69446399	69454180	+	69444639	69446826	11	H3K4me3	none	H3K4me3	No Meth/Exp+	no change
CCDC177	ENSG00000255994.1	chr14	70037483	70038032	-	70038108	70040302	8	Bivalent	H3K4me3	none	No Meth/Exp-	no change
RP6-65G23.3	ENSG00000259153.1	chr14	71276922	71282120	+	71275512	71276571	8	H3K4me3	none	none	No Meth/Exp-	no change
PSEN1	ENSG00000080815.14	chr14	73603126	73690399	+	73602898	73603747	6	H3K4me3	H3K4me3	H3K4me3	No Meth/Exp-	no change
SYNDIG1L	ENSG00000183379.4	chr14	74872596	74892805	-	74892466	74893184	8	none	H3K27me3	none	Meth+/Exp-	Methylated
LTBP2	ENSG00000119681.7	chr14	74964873	75079306	-	75077317	75079596	11	Bivalent	Bivalent	none	Meth+/Exp+	Methylable
PGF	ENSG00000119630.9	chr14	75408537	75422487	-	75422068	75422507	2	Bivalent	none	none	No Meth/Exp+	no change
ZC2HC1C	ENSG00000119703.12	chr14	75530873	75545126	+	75535825	75536376	6	H3K4me3	H3K4me3	H3K4me3	No Meth/Exp-	no change
FLVCR2	ENSG00000119686.5	chr14	76044960	76129557	+	76044590	76045102	6	Bivalent	H3K4me3	none	No Meth/Exp+	no change
SPTLC2	ENSG00000100596.2	chr14	77972340	78083116	-	78082584	78083250	6	H3K4me3	H3K4me3	H3K4me3	No Meth/Exp-	no change
NRXN3	ENSG00000021645.13	chr14	78708734	80330762	+	79745153	79746059	6	Bivalent	Bivalent	H3K4me3	No Meth/Exp-	no change
RPS6KA5	ENSG00000100784.5	chr14	91336799	91526980	-	91526233	91527552	12	H3K4me3	H3K4me3	H3K4me3	No Meth/Exp-	no change
FBLN5	ENSG00000140092.10	chr14	92335756	92414331	-	92413581	92414324	6	Bivalent	Bivalent	H3K4me3	No Meth/Exp+	no change
CHGA	ENSG00000100604.8	chr14	93389425	93401638	+	93389245	93389899	6	Bivalent	none	none	Meth+/Exp-	Methylable
ASB2	ENSG00000100628.7	chr14	94400499	94443137	-	94405235	94406170	3	none	none	none	Meth+/Exp-	Methylated
GSC	ENSG00000133937.3	chr14	95234553	95236562	-	95234612	95236569	12	Bivalent	none	Bivalent	Meth+/Exp+	Methylated
CLMN	ENSG00000165959.7	chr14	95648277	95786243	-	95785752	95786151	4	Bivalent	none	H3K4me3	No Meth/Exp-	no change
LINC00617	ENSG00000250366.2	chr14	96342729	96391908	+	96342209	96343570	6	Bivalent	none	none	Meth+/Exp-	Methylable
AK7	ENSG00000140057.4	chr14	96858448	96955764	+	96857611	96858125	4	none	none	H3K4me3	No Meth/Exp-	no change
DEGS2	ENSG00000168350.6	chr14	100612756	100626500	-	100625319	100626461	8	Bivalent	H3K27me3	H3K4me3	Meth+/Exp-	Methylable
LINC00637	ENSG00000258735.1	chr14	104314058	104324386	+	104313161	104314990	9	Bivalent	Bivalent	H3K4me3	No Meth/Exp+	no change
TMEM179	ENSG00000258986.2	chr14	104941015	105071984	-	105070518	105071463	5	none	Bivalent	none	No Meth/Exp-	no change
ZBTB42	ENSG00000179627.9	chr14	105266933	105271049	+	105266444	105267838	4	Bivalent	Bivalent	H3K4me3	No Meth/Exp+	no change
CDCA4	ENSG00000170779.10	chr14	105475910	105487485	-	105486611	105487915	10	H3K4me3	H3K4me3	H3K4me3	No Meth/Exp+	no change
NIPA1	ENSG00000170113.11	chr15	23043277	23100005	-	23085441	23086898	11	H3K4me3	H3K4me3	H3K4me3	No Meth/Exp-	no change
RP11-566K19.6	ENSG00000259344.1	chr15	23095170	23115256	-	23115057	23115471	5	none	none	H3K4me3	No Meth/Exp-	no change
NDN	ENSG00000182636.4	chr15	23930565	23932450	-	23931559	23932547	5	none	H3K4me3	none	No Meth/Exp-	no change
NPAP1	ENSG00000185823.2	chr15	24920541	24928593	+	24920613	24921252	3	none	none	none	No Meth/Exp-	no change
MTMR10	ENSG00000166912.12	chr15	31231144	31283810	-	31283404	31284414	5	H3K4me3	none	H3K4me3	No Meth/Exp-	no change
RP11-758N13.1	ENSG00000259721.1	chr15	33009471	33011208	-	33009530	33011696	7	Bivalent	Bivalent	Bivalent	Meth+/Exp-	Methylable
GREM1	ENSG00000166923.6	chr15	33010175	33026870	+	33009530	33011696	7	Bivalent	Bivalent	Bivalent	Meth+/Exp-	Methylable
GJD2	ENSG00000159248.4	chr15	35043233	35047166	-	35046443	35047480	10	Bivalent	H3K27me3	none	Meth+/Exp-	Methylable
RP11-814P5.1	ENSG00000250007.2	chr15	35047285	35105124	+	35046443	35047480	10	Bivalent	H3K27me3	none	Meth+/Exp-	Methylable
BUB1B	ENSG00000156970.8	chr15	40453224	40513337	+	40453005	40453685	11	H3K4me3	H3K4me3	H3K4me3	No Meth/Exp+	no change
CASC5	ENSG00000137812.15	chr15	40886218	40956540	+	40886396	40886918	5	H3K4me3	H3K4me3	H3K4me3	No Meth/Exp+	no change
RAD51	ENSG00000051180.12	chr15	40986972	41024354	+	40986871	40987772	13	H3K4me3	H3K4me3	H3K4me3	No Meth/Exp+	no change
DLL4	ENSG00000128917.5	chr15	41221538	41231237	+	41217789	41223180	21	Bivalent	Bivalent	Bivalent	No Meth/Exp+	no change
OIP5	ENSG00000104147.4	chr15	41601466	41624819	-	41624362	41625340	15	H3K4me3	H3K4me3	H3K4me3	No Meth/Exp+	no change
NUSAP1	ENSG00000137804.8	chr15	41624892	41673248	+	41624362	41625340	15	H3K4me3	H3K4me3	H3K4me3	No Meth/Exp+	no change
TYRO3	ENSG00000092445.7	chr15	41849873	41871536	+	41851723	41851970	2	none	H3K4me3	H3K4me3	No Meth/Exp-	no change
MAP1A	ENSG00000166963.8	chr15	43803156	43823818	+	43802881	43803407	6	Bivalent	H3K4me3	H3K4me3	No Meth/Exp-	no change
WDR76	ENSG00000092470.7	chr15	44119161	44160617	+	44119074	44119277	5	none	H3K4me3	H3K4me3	No Meth/Exp+	no change
DUOXA1	ENSG00000140254.8	chr15	45409569	45422136	-	45421236	45422394	14	Bivalent	none	none	Meth+/Exp-	Methylable
C15orf48	ENSG00000166920.6	chr15	45722727	45740959	+	45722561	45722939	6	none	H3K27me3	none	Meth+/Exp+	Methylated
SLC30A4	ENSG00000104154.5	chr15	45771809	45815005	-	45814335	45815344	8	Bivalent	Bivalent	H3K4me3	No Meth/Exp-	no change
SQRDL	ENSG00000137767.9	chr15	45923346	45983492	+	45926877	45927758	9	Bivalent	Bivalent	none	No Meth/Exp+	no change
SECISBP2L	ENSG00000138593.4	chr15	49280673	49338760	-	49338363	49338771	3	H3K4me3	H3K4me3	H3K4me3	No Meth/Exp-	no change
GLDN	ENSG00000186417.9	chr15	51633826	51700210	+	51633724	51634318	4	Bivalent	H3K27me3	H3K4me3	No Meth/Exp-	no change
ONECUT1	ENSG00000169856.7	chr15	53049637	53083273	-	53080458	53083699	11	Bivalent	Bivalent	none	Meth+/Exp+	Methylable
WDR72	ENSG00000166415.10	chr15	53805938	54055075	-	54051655	54052004	3	Bivalent	H3K27me3	none	Meth+/Exp+	Methylable
GCOM1	ENSG00000137878.12	chr15	57884106	58006943	+	57883998	57884358	4	Bivalent	Bivalent	none	No Meth/Exp+	no change
CCNB2	ENSG00000157456.3	chr15	59397277	59417244	+	59397270	59397749	3	H3K4me3	H3K4me3	H3K4me3	No Meth/Exp+	no change
C2CD4A	ENSG00000198535.5	chr15	62359176	62363116	+	62359827	62360995	5	Bivalent	Bivalent	H3K4me3	No Meth/Exp+	no change
CA12	ENSG00000074410.9	chr15	63613577	63674360	-	63673888	63674160	5	Bivalent	Bivalent	Bivalent	No Meth/Exp+	no change
DAPK2	ENSG00000035664.7	chr15	64199235	64364232	-	64338152	64338886	3	Bivalent	H3K4me3	none	No Meth/Exp-	no change
KIAA0101	ENSG00000166803.6	chr15	64657193	64679886	-	64679907	64680233	3	H3K4me3	H3K4me3	H3K4me3	No Meth/Exp+	no change
RBPMS2	ENSG00000166831.4	chr15	65032091	65067786	-	65066916	65068352	4	H3K4me3	H3K4me3	none	No Meth/Exp+	no change
LINC00277	ENSG00000212766.5	chr15	69365266	69388160	+	69366321	69366796	4	Bivalent	Bivalent	H3K4me3	No Meth/Exp-	no change
KIF23	ENSG00000137807.9	chr15	69706585	69740764	+	69706516	69707352	11	H3K4me3	H3K4me3	H3K4me3	No Meth/Exp+	no change
LARP6	ENSG00000166173.9	chr15	71123863	71146498	-	71145995	71146820	4	H3K4me3	none	H3K4me3	No Meth/Exp-	no change
CELF6	ENSG00000140488.10	chr15	72577068	72612470	-	72611946	72612802	6	none	none	H3K4me3	No Meth/Exp-	no change
NEO1	ENSG00000067141.12	chr15	73344051	73597547	+	73343779	73345369	7	H3K4me3	H3K4me3	H3K4me3	No Meth/Exp-	no change
CD276	ENSG00000103855.13	chr15	73976307	74006859	+	73976559	73977323	5	H3K4me3	H3K4me3	none	No Meth/Exp+	no change
LOXL1	ENSG00000129038.11	chr15	74218330	74244478	+	74218696	74220373	16	none	none	none	No Meth/Exp+	no change
CYP1A1	ENSG00000140465.9	chr15	75011883	75017951	-	75018186	75019336	25	Bivalent	Bivalent	H3K4me3	Meth+/Exp-	Methylable
DNAJA4	ENSG00000140403.8	chr15	78556428	78574538	+	78556405	78557542	11	Bivalent	H3K27me3	H3K4me3	Meth+/Exp-	Methylable
RASGRF1	ENSG00000058335.11	chr15	79252289	79383115	-	79381804	79384209	22	Bivalent	H3K27me3	none	Meth+/Exp-	Methylable
RP11-761I4.3	ENSG00000259343.1	chr15	81616718	81654378	+	81616253	81616963	10	none	Bivalent	H3K4me3	No Meth/Exp-	no change
CPEB1	ENSG00000214575.5	chr15	83211951	83317612	-	83315116	83317541	13	Bivalent	Bivalent	H3K4me3	Meth+/Exp-	Methylable
RP11-752G15.3	ENSG00000259462.1	chr15	83316521	83361572	+	83315116	83317541	13	Bivalent	Bivalent	H3K4me3	Meth+/Exp-	Methylable
SH3GL3	ENSG00000140600.12	chr15	84115980	84287495	+	84115762	84116921	10	Bivalent	Bivalent	H3K4me3	No Meth/Exp-	no change
ADAMTSL3	ENSG00000156218.8	chr15	84322838	84708594	+	84322322	84323771	6	Bivalent	H3K27me3	none	Meth+/Exp-	Methylable
NMB	ENSG00000197696.5	chr15	85198360	85201794	-	85201196	85201684	3	H3K4me3	none	H3K4me3	No Meth/Exp+	no change
PDE8A	ENSG00000073417.10	chr15	85523671	85682376	+	85523512	85525865	11	Bivalent	Bivalent	H3K4me3	No Meth/Exp-	no change
AEN	ENSG00000181026.13	chr15	89164527	89175513	+	89164376	89164952	7	H3K4me3	H3K4me3	H3K4me3	No Meth/Exp+	no change
ACAN	ENSG00000157766.11	chr15	89346674	89418585	+	89346043	89347203	6	Bivalent	Bivalent	H3K27me3	No Meth/Exp+	no change
HAPLN3	ENSG00000140511.7	chr15	89420519	89438857	-	89438176	89438850	5	Bivalent	Bivalent	H3K27me3	No Meth/Exp+	no change
FANCI	ENSG00000140525.13	chr15	89787180	89860492	+	89786998	89787691	6	H3K4me3	H3K4me3	H3K4me3	No Meth/Exp+	no change
RP11-217B1.2	ENSG00000261441.1	chr15	89878284	89879392	+	89877597	89878597	6	Bivalent	Bivalent	H3K4me3	No Meth/Exp+	no change
TICRR	ENSG00000140534.9	chr15	90118713	90174287	+	90118971	90119363	4	H3K4me3	H3K4me3	none	No Meth/Exp+	no change
CTD-2315E11.1	ENSG00000259685.1	chr15	90645881	90676674	+	90644998	90646164	7	none	none	H3K4me3	No Meth/Exp-	no change
BLM	ENSG00000197299.6	chr15	91260558	91358859	+	91260384	91260919	10	H3K4me3	H3K4me3	H3K4me3	No Meth/Exp+	no change
MAN2A2	ENSG00000196547.10	chr15	91445448	91465814	+	91445563	91446768	7	Bivalent	H3K4me3	H3K4me3	No Meth/Exp-	no change
PRC1	ENSG00000198901.9	chr15	91509270	91538859	-	91537236	91538218	10	H3K4me3	H3K4me3	H3K4me3	No Meth/Exp+	no change
SLCO3A1	ENSG00000176463.9	chr15	92396925	92715665	+	92396013	92397682	10	Bivalent	Bivalent	H3K4me3	No Meth/Exp-	no change
NR2F2-AS1	ENSG00000247809.3	chr15	96670598	96870590	-	96864881	96866787	5	Bivalent	none	none	Meth+/Exp+	Methylable
NR2F2	ENSG00000185551.8	chr15	96869167	96883492	+	96873408	96877721	28	Bivalent	H3K4me3	Bivalent	Meth+/Exp+	Methylable
RP11-66B24.2	ENSG00000232386.5	chr15	101389766	101402376	+	101389732	101390260	4	none	none	none	Meth+/Exp-	Methylable
RP11-66B24.7	ENSG00000272808.1	chr15	101390036	101404501	+	101389732	101390260	4	none	none	none	Meth+/Exp-	Methylable
PCSK6	ENSG00000140479.12	chr15	101840818	102065405	-	102028860	102030608	4	Bivalent	none	none	Meth+/Exp-	Methylable
TARSL2	ENSG00000185418.11	chr15	102193801	102264807	-	102264097	102264750	4	H3K4me3	H3K4me3	H3K4me3	No Meth/Exp-	no change
HBA2	ENSG00000188536.8	chr16	222846	223709	+	222369	223447	4	H3K27me3	H3K27me3	none	No Meth/Exp+	no change
LA16c-366D3.1	ENSG00000260439.1	chr16	971033	984495	+	971429	971825	3	none	none	none	Meth+/Exp-	Methylable
TMEM204	ENSG00000131634.9	chr16	1578689	1605581	+	1583809	1584641	8	none	none	H3K4me3	No Meth/Exp+	no change
ABCA17P	ENSG00000238098.4	chr16	2389151	2476700	+	2389706	2392164	6	Bivalent	H3K4me3	H3K4me3	No Meth/Exp-	no change
PAQR4	ENSG00000162073.9	chr16	3019246	3023490	+	3016646	3020326	14	H3K4me3	H3K4me3	H3K4me3	Meth+/Exp-	Methylated
MMP25	ENSG00000008516.12	chr16	3096682	3110727	+	3095600	3097033	10	Bivalent	Bivalent	H3K27me3	No Meth/Exp+	no change
RP11-473M20.16	ENSG00000261889.1	chr16	3206737	3207484	-	3207597	3209413	6	Bivalent	H3K4me3	none	No Meth/Exp+	no change
ROGDI	ENSG00000067836.8	chr16	4846969	4852951	-	4852117	4853176	9	H3K4me3	H3K4me3	H3K4me3	No Meth/Exp-	no change
RP11-10K17.6	ENSG00000267070.1	chr16	5148740	5192596	+	5147250	5148840	8	H3K4me3	H3K4me3	H3K4me3	No Meth/Exp-	no change
GRIN2A	ENSG00000183454.9	chr16	9852376	10276611	-	10273943	10277424	22	Bivalent	H3K27me3	none	Meth+/Exp-	Methylated
ATF7IP2	ENSG00000166669.9	chr16	10420291	10577495	+	10479686	10480254	4	none	H3K4me3	none	Meth+/Exp-	Methylated
SOCS1	ENSG00000185338.4	chr16	11348262	11350036	-	11348541	11350803	20	H3K4me3	H3K4me3	H3K4me3	Meth+/Exp+	Methylable
CPPED1	ENSG00000103381.7	chr16	12756919	12897874	-	12897365	12897889	6	H3K4me3	H3K4me3	H3K4me3	Meth+/Exp-	Methylable
RP11-1035H13.3	ENSG00000260342.2	chr16	18799385	18812841	-	18812387	18813399	9	H3K4me3	H3K4me3	H3K4me3	No Meth/Exp+	no change
CTD-2288F12.1	ENSG00000260352.1	chr16	18938185	18948365	+	18937030	18938126	4	H3K4me3	H3K4me3	H3K4me3	No Meth/Exp+	no change
TMC7	ENSG00000170537.8	chr16	18995256	19075264	+	18995156	18995577	5	none	H3K4me3	H3K4me3	No Meth/Exp-	no change
CCP110	ENSG00000103540.12	chr16	19535133	19564730	+	19535074	19535635	10	H3K4me3	H3K4me3	H3K4me3	No Meth/Exp-	no change
GPRC5B	ENSG00000167191.7	chr16	19868616	19897489	-	19894965	19897156	11	H3K4me3	H3K4me3	H3K4me3	Meth+/Exp-	Methylated
GPR139	ENSG00000180269.7	chr16	20042807	20085239	-	20084707	20085305	3	Bivalent	H3K27me3	none	No Meth/Exp+	no change
HS3ST2	ENSG00000122254.6	chr16	22825498	22927659	+	22824616	22826459	11	Bivalent	H3K27me3	Bivalent	No Meth/Exp-	no change
USP31	ENSG00000103404.10	chr16	23072727	23160591	-	23159966	23160966	6	H3K4me3	none	H3K4me3	No Meth/Exp-	no change
SCNN1B	ENSG00000168447.6	chr16	23289552	23392620	+	23313239	23313946	8	Bivalent	H3K27me3	none	No Meth/Exp+	no change
PLK1	ENSG00000166851.10	chr16	23688977	23701688	+	23689891	23690671	6	H3K4me3	H3K4me3	H3K4me3	No Meth/Exp+	no change
CHP2	ENSG00000166869.2	chr16	23765948	23770272	+	23765969	23766869	4	Bivalent	H3K27me3	none	Meth+/Exp-	Methylable
RP11-22P6.3	ENSG00000260442.1	chr16	28890278	28891241	-	28890954	28891868	5	Bivalent	H3K4me3	H3K4me3	No Meth/Exp+	no change
YPEL3	ENSG00000090238.7	chr16	30103635	30108236	-	30107511	30107875	2	H3K4me3	none	H3K4me3	No Meth/Exp-	no change
RP11-196G11.2	ENSG00000260911.1	chr16	31054471	31061201	+	31053479	31053800	3	H3K4me3	none	none	Meth+/Exp-	Methylated
TGFB1I1	ENSG00000140682.14	chr16	31482906	31489281	+	31483276	31483646	4	Bivalent	H3K4me3	none	No Meth/Exp+	no change
SHCBP1	ENSG00000171241.4	chr16	46614466	46655538	-	46655002	46655374	4	H3K4me3	H3K4me3	none	No Meth/Exp+	no change
CBLN1	ENSG00000102924.7	chr16	49311828	49315742	-	49314037	49316543	9	Bivalent	none	Bivalent	Meth+/Exp-	Methylable
IRX5	ENSG00000176842.10	chr16	54964774	54968397	+	54962422	54967805	25	Bivalent	H3K4me3	Bivalent	Meth+/Exp+	Methylable
MMP2	ENSG00000087245.8	chr16	55423612	55540603	+	55513220	55513526	3	Bivalent	none	none	No Meth/Exp+	no change
LPCAT2	ENSG00000087253.7	chr16	55542910	55620582	+	55542920	55543274	3	none	none	none	No Meth/Exp-	no change
MT2A	ENSG00000125148.6	chr16	56642111	56643409	+	56642129	56642595	5	Bivalent	Bivalent	H3K4me3	No Meth/Exp+	no change
MT1A	ENSG00000205362.6	chr16	56672578	56673999	+	56671937	56672530	5	Bivalent	none	Bivalent	Meth+/Exp+	Methylable
MT1H	ENSG00000205358.3	chr16	56703726	56705041	+	56703387	56703648	2	Bivalent	none	none	No Meth/Exp+	no change
MT1X	ENSG00000187193.8	chr16	56716336	56718108	+	56715992	56716425	6	none	Bivalent	H3K4me3	No Meth/Exp+	no change
NLRC5	ENSG00000140853.11	chr16	57023397	57117443	+	57023190	57023768	10	Bivalent	Bivalent	H3K4me3	No Meth/Exp+	no change
RP11-407G23.1	ENSG00000260148.1	chr16	57125125	57126215	-	57126044	57127110	3	Bivalent	H3K4me3	H3K4me3	No Meth/Exp-	no change
PLLP	ENSG00000102934.5	chr16	57290004	57318599	-	57317967	57318964	13	Bivalent	Bivalent	none	Meth+/Exp-	Methylable
CCDC102A	ENSG00000135736.5	chr16	57546090	57570511	-	57569848	57570844	7	H3K4me3	none	H3K4me3	No Meth/Exp+	no change
CMTM3	ENSG00000140931.15	chr16	66637777	66647795	+	66638254	66639561	11	H3K4me3	H3K4me3	H3K4me3	No Meth/Exp+	no change
CES4A	ENSG00000172824.10	chr16	67022492	67043661	+	67034470	67035340	3	Bivalent	Bivalent	H3K4me3	No Meth/Exp-	no change
EXOC3L1	ENSG00000179044.11	chr16	67218269	67224107	-	67217716	67219219	11	Bivalent	Bivalent	H3K4me3	Meth+/Exp+	Methylable
TPPP3	ENSG00000159713.6	chr16	67423712	67427438	-	67427284	67428950	10	Bivalent	none	none	No Meth/Exp-	no change
HSD11B2	ENSG00000176387.6	chr16	67464555	67471456	+	67464388	67465462	9	Bivalent	none	none	No Meth/Exp+	no change
MARVELD3	ENSG00000140832.5	chr16	71660064	71676017	+	71659829	71660747	8	none	Bivalent	none	Meth+/Exp+	Methylable
FA2H	ENSG00000103089.4	chr16	74746853	74808729	-	74808313	74808986	6	Bivalent	Bivalent	none	No Meth/Exp-	no change
LDHD	ENSG00000166816.9	chr16	75145758	75150669	-	75148398	75148864	3	none	none	none	No Meth/Exp-	no change
RP11-96P7.1	ENSG00000250514.1	chr16	76668895	76692375	+	76668835	76669152	2	none	none	none	No Meth/Exp-	no change
DYNLRB2	ENSG00000168589.10	chr16	80574631	80584657	+	80574741	80575090	3	none	none	H3K4me3	No Meth/Exp-	no change
RP11-303E16.3	ENSG00000260213.1	chr16	81050397	81069364	-	81069532	81070163	4	H3K4me3	H3K4me3	H3K4me3	No Meth/Exp-	no change
ATP2C2	ENSG00000064270.8	chr16	84402133	84497793	+	84401957	84402497	4	Bivalent	none	none	No Meth/Exp-	no change
GINS2	ENSG00000131153.4	chr16	85709804	85723679	-	85722209	85722941	8	none	none	none	No Meth/Exp+	no change
FOXF1	ENSG00000103241.5	chr16	86544133	86548076	+	86541430	86545228	26	Bivalent	Bivalent	none	Meth+/Exp+	Methylable
JPH3	ENSG00000154118.8	chr16	87635441	87731762	+	87636506	87637284	5	Bivalent	Bivalent	Bivalent	No Meth/Exp-	no change
FANCA	ENSG00000187741.10	chr16	89803957	89883065	-	89882392	89883458	11	H3K4me3	H3K4me3	H3K4me3	No Meth/Exp+	no change
DOC2B	ENSG00000272636.1	chr17	5810	31427	-	29994	31868	8	Bivalent	Bivalent	none	No Meth/Exp-	no change
FAM57A	ENSG00000167695.10	chr17	635652	646206	+	635203	636499	5	none	H3K4me3	H3K4me3	No Meth/Exp+	no change
HIC1	ENSG00000177374.8	chr17	1957448	1962981	+	1952919	1962328	74	Bivalent	Bivalent	H3K4me3	No Meth/Exp+	no change
ASPA	ENSG00000108381.6	chr17	3375668	3406713	+	3375006	3375237	4	none	none	none	No Meth/Exp-	no change
TRPV3	ENSG00000167723.10	chr17	3413796	3461289	-	3438841	3439046	4	H3K4me3	none	H3K4me3	No Meth/Exp-	no change
P2RX5-TAX1BP3	ENSG00000257950.3	chr17	3566357	3599488	-	3599052	3599551	4	Bivalent	Bivalent	none	No Meth/Exp-	no change
P2RX5	ENSG00000083454.17	chr17	3575493	3599698	-	3599052	3599551	4	Bivalent	Bivalent	none	No Meth/Exp-	no change
GSG2	ENSG00000177602.4	chr17	3627211	3630067	+	3626924	3627839	10	H3K4me3	H3K4me3	H3K4me3	No Meth/Exp+	no change
AC118754.4	ENSG00000229782.1	chr17	4400689	4402969	-	4401959	4403323	6	Bivalent	H3K27me3	none	No Meth/Exp-	no change
C17orf107	ENSG00000205710.3	chr17	4802713	4806227	+	4802265	4805402	16	none	none	H3K4me3	No Meth/Exp-	no change
FAM64A	ENSG00000129195.11	chr17	6347735	6354789	+	6347465	6348111	10	H3K4me3	H3K4me3	H3K4me3	No Meth/Exp+	no change
FBXO39	ENSG00000177294.6	chr17	6679542	6700420	+	6679205	6679710	11	Bivalent	H3K27me3	none	No Meth/Exp+	no change
BCL6B	ENSG00000161940.6	chr17	6926339	6933609	+	6925400	6927527	10	Bivalent	none	none	Meth+/Exp+	Methylated
RP11-104H15.9	ENSG00000262624.1	chr17	7339876	7340842	-	7339808	7340896	3	Bivalent	Bivalent	Bivalent	No Meth/Exp+	no change
TP53	ENSG00000141510.11	chr17	7565097	7590856	-	7591494	7591839	7	H3K4me3	H3K4me3	H3K4me3	No Meth/Exp+	no change
VAMP2	ENSG00000220205.4	chr17	8062467	8066864	-	8065909	8066494	6	H3K4me3	H3K4me3	H3K4me3	No Meth/Exp-	no change
AURKB	ENSG00000178999.8	chr17	8108056	8113918	-	8113632	8113966	5	H3K4me3	H3K4me3	H3K4me3	No Meth/Exp+	no change
MAP2K4	ENSG00000065559.10	chr17	11924141	12047147	+	11923951	11924871	8	H3K4me3	none	H3K4me3	No Meth/Exp-	no change
TOM1L2	ENSG00000175662.13	chr17	17746828	17875736	-	17875167	17875933	8	H3K4me3	H3K4me3	H3K4me3	No Meth/Exp-	no change
SNORD3B-2	ENSG00000262074.3	chr17	18966762	18967449	-	18966946	18967196	2	none	none	none	No Meth/Exp+	no change
SLC47A2	ENSG00000180638.13	chr17	19581601	19622292	-	19617083	19617424	4	none	none	none	No Meth/Exp+	no change
CCDC144NL	ENSG00000205212.3	chr17	20739760	20799453	-	20798957	20800112	11	none	none	none	No Meth/Exp-	no change
KCNJ12	ENSG00000184185.5	chr17	21279509	21323179	+	21279506	21281574	16	Bivalent	Bivalent	none	No Meth/Exp-	no change
SPAG5	ENSG00000076382.12	chr17	26904588	26926297	-	26925742	26926512	11	H3K4me3	H3K4me3	H3K4me3	No Meth/Exp+	no change
RAB34	ENSG00000109113.13	chr17	27041299	27045447	-	27044168	27045049	7	H3K4me3	H3K4me3	none	No Meth/Exp+	no change
TIAF1	ENSG00000221995.4	chr17	27400537	27418537	-	27406753	27408059	2	none	none	none	No Meth/Exp-	no change
CDK5R1	ENSG00000176749.4	chr17	30813637	30818274	+	30813177	30815239	13	H3K4me3	H3K4me3	H3K4me3	No Meth/Exp-	no change
AC084809.2	ENSG00000226377.1	chr17	31203777	31205655	+	31203451	31204185	3	none	Bivalent	H3K4me3	Meth+/Exp-	Methylable
TMEM98	ENSG00000006042.7	chr17	31254928	31272124	+	31254874	31255392	3	none	H3K4me3	Bivalent	No Meth/Exp-	no change
ARL5C	ENSG00000141748.8	chr17	37313147	37323737	-	37321482	37322099	4	Bivalent	Bivalent	none	No Meth/Exp-	no change
PPP1R1B	ENSG00000131771.9	chr17	37782993	37792879	+	37783314	37783919	3	Bivalent	Bivalent	Bivalent	No Meth/Exp-	no change
PNMT	ENSG00000141744.3	chr17	37824234	37826728	+	37823693	37824989	9	Bivalent	none	none	No Meth/Exp-	no change
CDC6	ENSG00000094804.5	chr17	38443885	38459171	+	38443815	38444152	9	H3K4me3	H3K4me3	H3K4me3	No Meth/Exp+	no change
TOP2A	ENSG00000131747.10	chr17	38544768	38574202	-	38573716	38574243	8	H3K4me3	H3K4me3	none	No Meth/Exp+	no change
LEPREL4	ENSG00000141696.8	chr17	39958199	39968856	-	39967407	39968604	12	H3K4me3	H3K4me3	H3K4me3	No Meth/Exp+	no change
FKBP10	ENSG00000141756.14	chr17	39968932	39979465	+	39967407	39968604	12	H3K4me3	H3K4me3	H3K4me3	No Meth/Exp+	no change
ETV4	ENSG00000175832.8	chr17	41605212	41656988	-	41622604	41624165	17	none	H3K4me3	H3K4me3	No Meth/Exp+	no change
NAGS	ENSG00000161653.6	chr17	42081914	42086431	+	42082027	42084972	16	Bivalent	Bivalent	none	No Meth/Exp+	no change
C17orf53	ENSG00000125319.10	chr17	42219274	42239844	+	42219153	42219616	7	H3K4me3	H3K4me3	H3K4me3	No Meth/Exp+	no change
FZD2	ENSG00000180340.5	chr17	42634925	42636907	+	42634829	42636851	7	Bivalent	H3K4me3	H3K4me3	Meth+/Exp+	Methylated
GJC1	ENSG00000182963.5	chr17	42875816	42908184	-	42906810	42908061	4	H3K4me3	H3K4me3	Bivalent	No Meth/Exp+	no change
KIF18B	ENSG00000186185.9	chr17	43002077	43025082	-	43024658	43025344	10	H3K4me3	none	none	No Meth/Exp+	no change
C1QL1	ENSG00000131094.3	chr17	43037061	43045439	-	43044369	43046424	13	Bivalent	Bivalent	none	Meth+/Exp+	Methylable
SPATA32	ENSG00000184361.8	chr17	43331760	43339479	-	43339124	43339832	11	Bivalent	none	H3K4me3	No Meth/Exp+	no change
ITGB3	ENSG00000259207.3	chr17	45331212	45421658	+	45330928	45331766	3	Bivalent	none	none	No Meth/Exp+	no change
SP6	ENSG00000189120.3	chr17	45922279	45933240	-	45928211	45928710	2	Bivalent	none	H3K27me3	No Meth/Exp+	no change
HOXB2	ENSG00000173917.9	chr17	46618256	46623441	-	46620367	46621373	5	Bivalent	Bivalent	H3K27me3	Meth+/Exp+	Methylable
HOXB-AS1	ENSG00000230148.4	chr17	46620913	46628610	+	46620367	46621373	5	Bivalent	Bivalent	H3K27me3	Meth+/Exp+	Methylable
HOXB9	ENSG00000170689.8	chr17	46698518	46703839	-	46702280	46704166	10	Bivalent	none	H3K27me3	No Meth/Exp+	no change
RP11-1079K10.3	ENSG00000248714.2	chr17	47438527	47447360	+	47438906	47439938	4	H3K4me3	H3K4me3	H3K4me3	No Meth/Exp-	no change
NGFR	ENSG00000064300.4	chr17	47572655	47592379	+	47572345	47575316	10	Bivalent	Bivalent	Bivalent	No Meth/Exp+	no change
COL1A1	ENSG00000108821.9	chr17	48260650	48278993	-	48276877	48279008	9	Bivalent	H3K27me3	none	No Meth/Exp+	no change
EME1	ENSG00000154920.10	chr17	48450581	48458844	+	48450456	48450665	9	H3K4me3	H3K4me3	H3K4me3	No Meth/Exp+	no change
CHAD	ENSG00000136457.5	chr17	48541857	48546327	-	48545570	48546900	12	none	H3K27me3	none	No Meth/Exp-	no change
ABCC3	ENSG00000108846.11	chr17	48712138	48769613	+	48712050	48712705	8	Bivalent	H3K27me3	none	No Meth/Exp+	no change
ANKRD40	ENSG00000154945.6	chr17	48770551	48785285	-	48784561	48785331	6	H3K4me3	H3K4me3	H3K4me3	No Meth/Exp-	no change
DGKE	ENSG00000153933.5	chr17	54911460	54946036	+	54910496	54912470	9	Bivalent	H3K4me3	H3K4me3	Meth+/Exp-	Methylated
2004-09-01	ENSG00000108387.10	chr17	56597611	56618179	-	56609025	56609583	6	Bivalent	Bivalent	H3K4me3	No Meth/Exp-	no change
AC099850.1	ENSG00000224738.1	chr17	57183959	57195628	+	57183628	57184441	7	H3K4me3	H3K4me3	H3K4me3	No Meth/Exp-	no change
YPEL2	ENSG00000175155.4	chr17	57409050	57479090	+	57408787	57410145	9	Bivalent	H3K4me3	H3K4me3	No Meth/Exp-	no change
C17orf82	ENSG00000187013.2	chr17	59489112	59490641	+	59488115	59490485	13	Bivalent	Bivalent	Bivalent	Meth+/Exp+	Methylated
BRIP1	ENSG00000136492.4	chr17	59758627	59940882	-	59940825	59941067	6	H3K4me3	H3K4me3	H3K4me3	No Meth/Exp+	no change
ACE	ENSG00000159640.10	chr17	61554422	61599205	+	61553834	61555063	10	Bivalent	Bivalent	none	No Meth/Exp+	no change
RGS9	ENSG00000108370.11	chr17	63133549	63223821	+	63133330	63133592	2	none	none	none	No Meth/Exp-	no change
CACNG1	ENSG00000108878.3	chr17	65040706	65052909	+	65040729	65041029	4	none	none	none	No Meth/Exp+	no change
FAM20A	ENSG00000108950.7	chr17	66531254	66597530	-	66596072	66597578	6	Bivalent	Bivalent	none	No Meth/Exp+	no change
KCNJ2-AS1	ENSG00000267365.1	chr17	68163102	68165543	-	68164913	68165720	5	Bivalent	H3K4me3	none	No Meth/Exp-	no change
KCNJ2	ENSG00000123700.4	chr17	68164814	68176189	+	68164913	68165720	5	Bivalent	H3K4me3	none	No Meth/Exp-	no change
LINC00511	ENSG00000227036.2	chr17	70319264	70636611	-	70587771	70589080	4	Bivalent	Bivalent	Bivalent	No Meth/Exp+	no change
SSTR2	ENSG00000180616.4	chr17	71161151	71167185	+	71160922	71162350	11	Bivalent	Bivalent	Bivalent	No Meth/Exp-	no change
SDK2	ENSG00000069188.12	chr17	71330523	71640228	-	71639028	71641670	13	Bivalent	none	none	No Meth/Exp-	no change
KIF19	ENSG00000196169.10	chr17	72322349	72351959	+	72321948	72322461	5	Bivalent	none	none	No Meth/Exp-	no change
GRIN2C	ENSG00000161509.9	chr17	72838162	72857627	-	72855621	72858012	12	Bivalent	none	Bivalent	No Meth/Exp-	no change
HID1	ENSG00000167861.11	chr17	72946838	72969261	-	72968167	72969164	7	Bivalent	Bivalent	H3K4me3	No Meth/Exp-	no change
WBP2	ENSG00000132471.7	chr17	73841780	73852588	-	73851260	73852222	10	H3K4me3	H3K4me3	H3K4me3	No Meth/Exp-	no change
FOXJ1	ENSG00000129654.7	chr17	74132414	74137380	-	74135922	74137802	10	Bivalent	H3K4me3	H3K27me3	No Meth/Exp+	no change
RNF157-AS1	ENSG00000267128.1	chr17	74136637	74150731	+	74135922	74137802	10	Bivalent	H3K4me3	H3K27me3	No Meth/Exp+	no change
SPHK1	ENSG00000176170.9	chr17	74372665	74383941	+	74378848	74382513	18	Bivalent	none	none	No Meth/Exp+	no change
PRCD	ENSG00000214140.6	chr17	74523668	74549660	+	74533281	74534566	11	Bivalent	Bivalent	H3K4me3	No Meth/Exp-	no change
TMC6	ENSG00000141524.11	chr17	76106539	76128488	-	76127521	76128406	3	Bivalent	H3K27me3	none	No Meth/Exp-	no change
SYNGR2	ENSG00000108639.3	chr17	76164639	76169608	+	76164395	76165272	4	H3K4me3	H3K4me3	H3K4me3	No Meth/Exp-	no change
AFMID	ENSG00000183077.11	chr17	76183398	76203782	+	76183077	76183449	7	H3K4me3	H3K4me3	H3K4me3	No Meth/Exp-	no change
BIRC5	ENSG00000089685.10	chr17	76210267	76221717	+	76210129	76210627	5	H3K4me3	H3K4me3	none	No Meth/Exp+	no change
TMEM235	ENSG00000204278.8	chr17	76227391	76237068	+	76228110	76228380	2	Bivalent	none	Bivalent	No Meth/Exp-	no change
SOCS3	ENSG00000184557.3	chr17	76352864	76356158	-	76354818	76357038	14	Bivalent	H3K4me3	none	Meth+/Exp+	Methylable
RP11-806H10.4	ENSG00000266970.1	chr17	76356534	76369992	+	76354818	76357038	14	Bivalent	H3K4me3	none	Meth+/Exp+	Methylable
CYTH1	ENSG00000108669.12	chr17	76670130	76778379	-	76777510	76778390	2	H3K4me3	H3K4me3	H3K4me3	No Meth/Exp-	no change
AATK-AS1	ENSG00000225180.2	chr17	79139307	79156964	+	79139501	79140028	2	none	Bivalent	H3K4me3	No Meth/Exp-	no change
AC137723.5	ENSG00000235296.1	chr17	79899745	79905477	+	79899019	79899491	2	H3K27me3	none	none	No Meth/Exp-	no change
SECTM1	ENSG00000141574.3	chr17	80278900	80291950	-	80291020	80292394	7	H3K27me3	H3K27me3	none	Meth+/Exp+	Methylable
FN3K	ENSG00000167363.9	chr17	80693451	80709073	+	80693067	80693729	4	none	H3K4me3	H3K4me3	No Meth/Exp-	no change
C18orf56	ENSG00000176912.3	chr18	641320	658340	-	657401	658745	12	H3K4me3	H3K4me3	H3K4me3	No Meth/Exp-	no change
NDC80	ENSG00000080986.8	chr18	2571510	2616634	+	2571286	2571580	9	H3K4me3	H3K4me3	H3K4me3	No Meth/Exp+	no change
C18orf42	ENSG00000231824.3	chr18	5145284	5197502	-	5196243	5197389	7	Bivalent	H3K27me3	Bivalent	Meth+/Exp-	Methylable
PIEZO2	ENSG00000154864.7	chr18	10666480	11148587	-	11148307	11149936	13	Bivalent	Bivalent	Bivalent	Meth+/Exp-	Methylable
TUBB6	ENSG00000176014.8	chr18	12307668	12344319	+	12307554	12309043	4	Bivalent	Bivalent	none	Meth+/Exp+	Methylable
RP11-805F19.1	ENSG00000264880.1	chr18	15159723	15164466	-	15165109	15165342	2	none	none	none	No Meth/Exp-	no change
RP11-454P7.3	ENSG00000265015.1	chr18	15196998	15197774	-	15197650	15198309	3	none	none	H3K4me3	Meth+/Exp-	Methylable
GREB1L	ENSG00000141449.10	chr18	18822203	19105378	+	18821383	18823349	12	Bivalent	H3K4me3	H3K4me3	Meth+/Exp-	Methylable
NPC1	ENSG00000141458.8	chr18	21086148	21166862	-	21166158	21167066	7	H3K4me3	none	H3K4me3	No Meth/Exp-	no change
CABYR	ENSG00000154040.16	chr18	21718942	21741567	+	21718862	21719550	12	H3K4me3	none	H3K4me3	No Meth/Exp-	no change
RNF125	ENSG00000101695.4	chr18	29598335	29653176	+	29598566	29599460	5	Bivalent	Bivalent	H3K4me3	No Meth/Exp-	no change
GAREM	ENSG00000141441.11	chr18	29704840	30050447	-	30050115	30051345	22	Bivalent	none	H3K4me3	Meth+/Exp-	Methylable
PSTPIP2	ENSG00000152229.14	chr18	43563502	43652238	-	43651796	43652455	9	Bivalent	H3K4me3	none	No Meth/Exp+	no change
SKA1	ENSG00000154839.5	chr18	47901365	47920543	+	47901254	47901662	5	H3K4me3	H3K4me3	H3K4me3	No Meth/Exp+	no change
CDH20	ENSG00000101542.5	chr18	59000815	59223006	+	59000683	59001692	6	Bivalent	H3K4me3	none	No Meth/Exp-	no change
PHLPP1	ENSG00000081913.9	chr18	60382672	60647666	+	60382304	60384371	12	H3K4me3	H3K4me3	H3K4me3	No Meth/Exp-	no change
FBXO15	ENSG00000141665.7	chr18	71740588	71815100	-	71814555	71815716	15	H3K4me3	H3K4me3	H3K4me3	No Meth/Exp-	no change
RP11-17M16.1	ENSG00000220032.4	chr18	74207477	74210045	+	74206239	74208638	11	none	H3K4me3	none	Meth+/Exp+	Methylable
GALR1	ENSG00000166573.4	chr18	74962505	74980858	+	74961556	74963822	16	Bivalent	H3K27me3	Bivalent	No Meth/Exp+	no change
PPAP2C	ENSG00000141934.5	chr19	281040	291393	-	290594	292249	15	H3K27me3	Bivalent	none	No Meth/Exp-	no change
AC009005.2	ENSG00000267751.1	chr19	567212	572215	-	572278	573134	6	H3K4me3	H3K4me3	H3K4me3	No Meth/Exp+	no change
HCN2	ENSG00000099822.2	chr19	589893	617159	+	589490	591719	7	Bivalent	H3K27me3	H3K4me3	No Meth/Exp-	no change
AMH	ENSG00000104899.4	chr19	2249308	2252072	+	2250560	2253959	18	Bivalent	none	none	Meth+/Exp+	Methylated
AC005624.2	ENSG00000267201.1	chr19	2458933	2462183	-	2462064	2462442	2	H3K4me3	none	H3K4me3	No Meth/Exp+	no change
ZFR2	ENSG00000105278.6	chr19	3804022	3869030	-	3868586	3869217	6	none	none	Bivalent	Meth+/Exp-	Methylable
PLIN5	ENSG00000214456.4	chr19	4522543	4535236	-	4535069	4535339	5	none	none	none	No Meth/Exp-	no change
CRB3	ENSG00000130545.11	chr19	6463788	6467232	+	6463991	6464780	10	none	H3K27me3	none	No Meth/Exp-	no change
TUBB4A	ENSG00000104833.6	chr19	6494330	6502859	-	6502090	6502411	4	Bivalent	Bivalent	H3K4me3	No Meth/Exp-	no change
TNFSF9	ENSG00000125657.3	chr19	6531010	6535931	+	6530826	6531552	3	Bivalent	Bivalent	H3K4me3	Meth+/Exp-	Methylable
C19orf45	ENSG00000198723.6	chr19	7557862	7573336	+	7565704	7566313	3	Bivalent	none	H3K4me3	No Meth/Exp-	no change
FBN3	ENSG00000142449.8	chr19	8130286	8214730	-	8214335	8214699	2	H3K4me3	none	none	No Meth/Exp+	no change
CTD-2369P2.2	ENSG00000175898.4	chr19	10332111	10333870	-	10334618	10335511	5	none	none	none	No Meth/Exp+	no change
ICAM1	ENSG00000090339.4	chr19	10381511	10397291	+	10380287	10381965	11	Bivalent	H3K4me3	Bivalent	Meth+/Exp+	Methylable
ICAM3	ENSG00000076662.5	chr19	10444452	10450499	-	10443688	10446022	9	H3K4me3	H3K4me3	H3K4me3	No Meth/Exp+	no change
S1PR5	ENSG00000180739.12	chr19	10623623	10628607	-	10627980	10628417	2	Bivalent	Bivalent	Bivalent	No Meth/Exp-	no change
CDKN2D	ENSG00000129355.6	chr19	10677138	10679735	-	10679134	10680036	8	H3K4me3	H3K4me3	H3K4me3	No Meth/Exp-	no change
SPC24	ENSG00000161888.7	chr19	11242196	11266484	-	11266230	11266726	7	H3K4me3	H3K4me3	H3K4me3	No Meth/Exp+	no change
ELAVL3	ENSG00000196361.5	chr19	11562141	11591861	-	11590295	11593643	12	Bivalent	H3K4me3	H3K4me3	No Meth/Exp-	no change
ACP5	ENSG00000102575.6	chr19	11685475	11689823	-	11689417	11689768	6	none	none	none	Meth+/Exp+	Methylable
SYCE2	ENSG00000161860.7	chr19	13009600	13030090	-	13029794	13030355	8	none	none	H3K4me3	No Meth/Exp+	no change
ASF1B	ENSG00000105011.4	chr19	14230321	14247768	-	14246899	14248520	12	H3K4me3	H3K4me3	H3K4me3	No Meth/Exp+	no change
EMR3	ENSG00000131355.10	chr19	14729929	14800839	-	14800835	14801167	2	H3K4me3	H3K4me3	H3K4me3	No Meth/Exp+	no change
SYDE1	ENSG00000105137.8	chr19	15218214	15225799	+	15217951	15218617	10	H3K4me3	H3K4me3	H3K4me3	No Meth/Exp+	no change
F2RL3	ENSG00000127533.3	chr19	16999671	17003417	+	17000627	17001398	4	none	none	none	No Meth/Exp+	no change
CPAMD8	ENSG00000160111.8	chr19	17003758	17137625	-	17007101	17008857	7	none	none	none	Meth+/Exp-	Methylated
PLVAP	ENSG00000130300.4	chr19	17462257	17488159	-	17487895	17488125	4	none	none	none	No Meth/Exp+	no change
CTD-2521M24.8	ENSG00000269053.1	chr19	17530114	17530583	-	17530650	17531535	5	H3K4me3	H3K4me3	H3K4me3	No Meth/Exp+	no change
FCHO1	ENSG00000130475.10	chr19	17858527	17899377	+	17858371	17858891	5	none	H3K4me3	H3K4me3	No Meth/Exp-	no change
IFI30	ENSG00000216490.3	chr19	18283972	18288927	+	18284521	18285023	5	Bivalent	Bivalent	H3K4me3	No Meth/Exp+	no change
GDF15	ENSG00000130513.6	chr19	18485541	18499986	+	18497063	18497269	3	Bivalent	H3K4me3	none	No Meth/Exp+	no change
LINC00664	ENSG00000268658.1	chr19	21666176	21686040	+	21666089	21666928	3	none	none	none	No Meth/Exp+	no change
AC011516.2	ENSG00000268038.1	chr19	22798359	22806773	-	22805800	22806721	3	none	none	none	No Meth/Exp-	no change
ZNF728	ENSG00000269067.1	chr19	23158270	23185978	-	23185562	23186050	3	none	none	H3K4me3	Meth+/Exp-	Methylable
CTD-2291D10.4	ENSG00000267886.1	chr19	23258003	23283163	+	23257957	23258518	2	H3K4me3	H3K4me3	H3K4me3	No Meth/Exp+	no change
VSTM2B	ENSG00000187135.7	chr19	30017406	30055386	+	30015781	30021367	16	Bivalent	none	Bivalent	Meth+/Exp-	Methylable
RHPN2	ENSG00000131941.3	chr19	33469499	33555794	-	33555246	33556431	4	none	none	none	No Meth/Exp+	no change
CTD-2540B15.9	ENSG00000267130.1	chr19	33795942	33800293	+	33792061	33794944	13	Bivalent	Bivalent	Bivalent	Meth+/Exp-	Methylable
FXYD1	ENSG00000266964.1	chr19	35629712	35634013	+	35632356	35632572	2	Bivalent	H3K27me3	H3K4me3	Meth+/Exp-	Methylable
MAG	ENSG00000105695.10	chr19	35783028	35804707	+	35800718	35801031	3	none	H3K27me3	none	No Meth/Exp-	no change
ETV2	ENSG00000105672.10	chr19	36132647	36135773	+	36134153	36135781	5	H3K4me3	H3K4me3	H3K4me3	No Meth/Exp+	no change
CLIP3	ENSG00000105270.10	chr19	36505562	36524245	-	36523391	36523887	2	H3K4me3	H3K4me3	H3K4me3	No Meth/Exp-	no change
WDR62	ENSG00000075702.12	chr19	36545783	36596008	+	36545001	36546065	9	H3K4me3	H3K4me3	H3K4me3	No Meth/Exp+	no change
COX7A1	ENSG00000161281.6	chr19	36641824	36643771	-	36642327	36643585	3	none	none	none	No Meth/Exp-	no change
ZNF540	ENSG00000171817.12	chr19	38042308	38104998	+	38085148	38085811	8	H3K4me3	H3K4me3	H3K4me3	No Meth/Exp-	no change
PPP1R14A	ENSG00000167641.6	chr19	38741877	38747231	-	38746638	38747379	11	Bivalent	Bivalent	none	Meth+/Exp-	Methylable
FBXO27	ENSG00000161243.4	chr19	39481354	39523425	-	39522264	39523227	4	H3K4me3	Bivalent	H3K4me3	No Meth/Exp-	no change
PAPL	ENSG00000183760.6	chr19	39574553	39602133	+	39574700	39575137	7	Bivalent	H3K27me3	Bivalent	No Meth/Exp-	no change
PLEKHG2	ENSG00000090924.10	chr19	39903225	39919054	+	39903036	39904490	8	H3K4me3	H3K4me3	H3K4me3	No Meth/Exp+	no change
DLL3	ENSG00000090932.6	chr19	39989535	39999121	+	39989397	39990140	9	Bivalent	Bivalent	none	No Meth/Exp+	no change
LIPE	ENSG00000079435.5	chr19	42905659	42931578	-	42927285	42928598	6	Bivalent	H3K4me3	H3K4me3	No Meth/Exp-	no change
PLAUR	ENSG00000011422.7	chr19	44150247	44174699	-	44172916	44173252	3	none	none	H3K4me3	No Meth/Exp+	no change
ZNF233	ENSG00000159915.8	chr19	44754318	44779470	+	44763978	44764312	4	H3K4me3	H3K4me3	H3K4me3	Meth+/Exp-	Methylated
PVRL2	ENSG00000130202.5	chr19	45349432	45392485	+	45349328	45350044	6	H3K4me3	H3K4me3	none	No Meth/Exp+	no change
VASP	ENSG00000125753.9	chr19	46009837	46030241	+	46009778	46011060	8	H3K4me3	none	H3K4me3	No Meth/Exp+	no change
GPR4	ENSG00000177464.4	chr19	46093022	46105466	-	46105259	46105467	2	Bivalent	none	Bivalent	No Meth/Exp+	no change
IGFL4	ENSG00000204869.4	chr19	46543006	46580376	-	46580385	46580971	3	Bivalent	Bivalent	none	No Meth/Exp-	no change
PTGIR	ENSG00000160013.4	chr19	47123725	47128375	-	47126782	47127478	4	none	none	none	No Meth/Exp+	no change
DACT3	ENSG00000197380.6	chr19	47150869	47164395	-	47163886	47164783	11	Bivalent	H3K4me3	H3K4me3	No Meth/Exp-	no change
ZNF541	ENSG00000118156.8	chr19	48023942	48059113	-	48047796	48049162	3	none	none	none	No Meth/Exp-	no change
CA11	ENSG00000063180.4	chr19	49141199	49149569	-	49140156	49141131	12	Bivalent	H3K4me3	H3K4me3	No Meth/Exp-	no change
PLEKHA4	ENSG00000105559.7	chr19	49340354	49371889	-	49340488	49340774	4	H3K4me3	H3K4me3	H3K4me3	Meth+/Exp+	Methylable
DHDH	ENSG00000104808.3	chr19	49436939	49448226	+	49436695	49437055	10	Bivalent	Bivalent	H3K4me3	No Meth/Exp-	no change
TEAD2	ENSG00000074219.9	chr19	49843852	49865714	-	49865341	49865690	3	H3K4me3	H3K4me3	Bivalent	No Meth/Exp+	no change
IL4I1	ENSG00000104951.11	chr19	50392911	50432796	-	50432354	50433138	8	H3K4me3	H3K4me3	H3K4me3	No Meth/Exp+	no change
ASPDH	ENSG00000204653.5	chr19	51014857	51017947	-	51014318	51014873	4	H3K4me3	H3K4me3	H3K4me3	No Meth/Exp-	no change
CTD-2616J11.14	ENSG00000268889.1	chr19	51897742	51906904	+	51897623	51897878	2	H3K4me3	H3K4me3	H3K4me3	No Meth/Exp+	no change
AC018755.1	ENSG00000167765.3	chr19	52095036	52097630	-	52097252	52098000	5	none	H3K4me3	H3K4me3	No Meth/Exp-	no change
HAS1	ENSG00000105509.6	chr19	52216365	52227247	-	52222423	52223208	4	Bivalent	H3K27me3	Bivalent	Meth+/Exp-	Methylable
TNNI3	ENSG00000129991.8	chr19	55663137	55669141	-	55667532	55668465	4	none	Bivalent	none	No Meth/Exp-	no change
SHISA7	ENSG00000187902.7	chr19	55940107	55954230	-	55953371	55954641	5	Bivalent	none	none	No Meth/Exp-	no change
NLRP4	ENSG00000160505.11	chr19	56347944	56393220	+	56369415	56369669	3	none	H3K27me3	none	No Meth/Exp-	no change
TRIB3	ENSG00000101255.6	chr20	361261	378203	+	361489	362805	4	none	none	none	No Meth/Exp+	no change
CPXM1	ENSG00000088882.7	chr20	2774715	2781283	-	2780978	2781497	10	Bivalent	H3K4me3	H3K27me3	No Meth/Exp+	no change
PRNP	ENSG00000171867.12	chr20	4666882	4682236	+	4666827	4667874	4	none	none	H3K4me3	No Meth/Exp-	no change
CHGB	ENSG00000089199.5	chr20	5892076	5906007	+	5891878	5892417	4	none	none	H3K4me3	No Meth/Exp-	no change
RP11-416N4.4	ENSG00000230506.1	chr20	10154168	10177638	+	10152768	10153193	3	Bivalent	Bivalent	H3K4me3	No Meth/Exp-	no change
RP11-103J8.1	ENSG00000270792.1	chr20	10653576	10975572	+	10652573	10655611	17	Bivalent	H3K4me3	H3K4me3	No Meth/Exp+	no change
THBD	ENSG00000178726.6	chr20	23026270	23030378	-	23028403	23032218	16	Bivalent	Bivalent	Bivalent	Meth+/Exp+	Methylated
GINS1	ENSG00000101003.8	chr20	25388363	25433264	+	25388232	25388642	6	H3K4me3	H3K4me3	H3K4me3	No Meth/Exp+	no change
TPX2	ENSG00000088325.11	chr20	30327074	30389608	+	30326913	30327430	5	H3K4me3	H3K4me3	H3K4me3	No Meth/Exp+	no change
FOXS1	ENSG00000179772.6	chr20	30432103	30433420	-	30432900	30433242	2	none	none	none	No Meth/Exp+	no change
TP53INP2	ENSG00000078804.8	chr20	33292094	33301243	+	33291815	33292568	9	Bivalent	none	H3K4me3	No Meth/Exp-	no change
FER1L4	ENSG00000088340.11	chr20	34146507	34195484	-	34188719	34190267	4	Bivalent	Bivalent	none	No Meth/Exp+	no change
EPB41L1	ENSG00000088367.16	chr20	34679426	34820721	+	34680003	34681001	4	Bivalent	H3K4me3	none	No Meth/Exp-	no change
MYL9	ENSG00000101335.5	chr20	35169887	35178228	+	35169189	35169540	3	none	none	none	No Meth/Exp+	no change
TGIF2	ENSG00000118707.5	chr20	35201891	35222353	+	35201323	35203490	8	H3K4me3	H3K4me3	none	No Meth/Exp+	no change
TGM2	ENSG00000198959.7	chr20	36756863	36794980	-	36793549	36793867	9	none	none	H3K4me3	No Meth/Exp+	no change
KIAA1755	ENSG00000149633.7	chr20	36838890	36889174	-	36888891	36889442	9	none	H3K27me3	none	No Meth/Exp-	no change
FAM83D	ENSG00000101447.9	chr20	37554955	37581703	+	37554754	37555835	11	H3K4me3	H3K4me3	H3K4me3	No Meth/Exp+	no change
PTPRT	ENSG00000196090.8	chr20	40701392	41818610	-	41817475	41819212	11	Bivalent	H3K27me3	none	No Meth/Exp-	no change
MYBL2	ENSG00000101057.11	chr20	42295754	42345136	+	42295399	42296320	6	H3K4me3	H3K4me3	none	No Meth/Exp+	no change
RP11-445H22.4	ENSG00000244558.1	chr20	43323533	43374662	-	43374349	43374890	9	Bivalent	Bivalent	none	No Meth/Exp-	no change
PABPC1L	ENSG00000101104.8	chr20	43538703	43587676	+	43538616	43539060	5	H3K4me3	H3K4me3	H3K4me3	No Meth/Exp+	no change
TP53TG5	ENSG00000124251.6	chr20	44002526	44036529	-	44034458	44035954	13	Bivalent	H3K4me3	H3K4me3	No Meth/Exp-	no change
DBNDD2	ENSG00000244274.3	chr20	44034697	44039250	+	44034458	44035954	13	Bivalent	H3K4me3	H3K4me3	No Meth/Exp-	no change
UBE2C	ENSG00000175063.12	chr20	44441215	44445596	+	44440946	44441655	16	H3K4me3	H3K4me3	H3K4me3	No Meth/Exp+	no change
SLC13A3	ENSG00000158296.9	chr20	45186463	45304714	-	45279781	45280169	2	Bivalent	none	H3K4me3	Meth+/Exp-	Methylable
SLC2A10	ENSG00000197496.4	chr20	45338126	45364965	+	45338071	45338663	6	none	none	none	No Meth/Exp+	no change
EYA2	ENSG00000064655.14	chr20	45523263	45817492	+	45523250	45524020	3	Bivalent	H3K27me3	Bivalent	No Meth/Exp+	no change
KCNB1	ENSG00000158445.7	chr20	47980414	48099184	-	48098512	48099560	9	Bivalent	none	H3K4me3	No Meth/Exp-	no change
SALL4	ENSG00000101115.8	chr20	50400581	50419059	-	50417312	50419045	5	H3K4me3	H3K4me3	none	Meth+/Exp+	Methylable
CYP24A1	ENSG00000019186.5	chr20	52769988	52790512	-	52789252	52790986	10	Bivalent	H3K27me3	Bivalent	Meth+/Exp-	Methylable
AURKA	ENSG00000087586.13	chr20	54944445	54967393	-	54967036	54968001	15	H3K4me3	H3K4me3	H3K4me3	No Meth/Exp+	no change
HAR1B	ENSG00000231133.2	chr20	61726845	61733671	-	61733275	61734521	3	Bivalent	Bivalent	none	No Meth/Exp-	no change
HAR1A	ENSG00000225978.2	chr20	61733483	61735738	+	61733275	61734521	3	Bivalent	Bivalent	none	No Meth/Exp-	no change
CHRNA4	ENSG00000101204.11	chr20	61975420	62009753	-	61992186	61993599	4	Bivalent	none	H3K4me3	No Meth/Exp-	no change
RP11-261N11.8	ENSG00000203900.2	chr20	61991340	62002529	+	61992186	61993599	4	Bivalent	none	H3K4me3	No Meth/Exp-	no change
C20orf195	ENSG00000125531.5	chr20	62184373	62188061	+	62185073	62185572	3	H3K4me3	none	none	No Meth/Exp+	no change
ANKRD20A11P	ENSG00000215559.4	chr21	15281895	15352758	-	15351908	15352658	4	none	none	none	Meth+/Exp-	Methylated
RBM11	ENSG00000185272.9	chr21	15588451	15600693	+	15588439	15588908	4	none	Bivalent	H3K4me3	Meth+/Exp-	Methylable
C21orf91	ENSG00000154642.6	chr21	19161284	19191703	-	19191095	19191952	5	H3K4me3	H3K4me3	none	No Meth/Exp-	no change
NCAM2	ENSG00000154654.10	chr21	22370633	22915650	+	22369423	22370582	7	Bivalent	none	none	No Meth/Exp-	no change
MIR155HG	ENSG00000234883.2	chr21	26934221	26947480	+	26934423	26934805	4	Bivalent	none	H3K4me3	No Meth/Exp+	no change
AP000275.65	ENSG00000265590.5	chr21	33951132	33984591	-	33984367	33985450	11	H3K4me3	H3K4me3	H3K4me3	No Meth/Exp-	no change
AP000282.2	ENSG00000227757.1	chr21	34285957	34443410	-	34442206	34444543	15	Bivalent	Bivalent	Bivalent	No Meth/Exp-	no change
AC006946.15	ENSG00000235478.1	chr22	17602476	17612994	+	17600563	17602611	7	none	H3K4me3	H3K4me3	Meth+/Exp-	Methylable
ATP6V1E1	ENSG00000131100.8	chr22	18074902	18111584	-	18111132	18111672	3	H3K4me3	H3K4me3	H3K4me3	No Meth/Exp-	no change
USP18	ENSG00000184979.9	chr22	18632666	18660164	+	18632736	18632998	4	Bivalent	none	H3K4me3	No Meth/Exp+	no change
CDC45	ENSG00000093009.5	chr22	19466982	19508135	+	19466308	19467811	15	H3K4me3	H3K4me3	H3K4me3	No Meth/Exp+	no change
AIFM3	ENSG00000183773.11	chr22	21319396	21335649	+	21319178	21319912	5	Bivalent	none	H3K27me3	No Meth/Exp-	no change
P2RX6P	ENSG00000206145.4	chr22	21389532	21399306	-	21399979	21400270	5	none	H3K4me3	H3K4me3	No Meth/Exp-	no change
GNAZ	ENSG00000128266.7	chr22	23412540	23467224	+	23412224	23413597	6	none	none	H3K4me3	No Meth/Exp-	no change
POM121L9P	ENSG00000128262.4	chr22	24647796	24661493	+	24647367	24647600	3	none	none	none	No Meth/Exp+	no change
CHEK2	ENSG00000183765.16	chr22	29083731	29138410	-	29137866	29138560	11	H3K4me3	H3K4me3	H3K4me3	No Meth/Exp+	no change
RASL10A	ENSG00000100276.9	chr22	29708922	29715668	-	29709281	29712013	12	Bivalent	Bivalent	none	Meth+/Exp-	Methylated
MTFP1	ENSG00000242114.1	chr22	30821518	30825045	+	30821625	30822010	6	H3K4me3	H3K4me3	H3K4me3	No Meth/Exp+	no change
PIK3IP1	ENSG00000100100.8	chr22	31677579	31688520	-	31686636	31687371	4	Bivalent	H3K4me3	H3K4me3	No Meth/Exp-	no change
TIMP3	ENSG00000100234.11	chr22	33197687	33259030	+	33197380	33198267	4	Bivalent	Bivalent	none	No Meth/Exp+	no change
HMOX1	ENSG00000100292.12	chr22	35776354	35790207	+	35776988	35777221	3	none	none	H3K4me3	No Meth/Exp+	no change
CACNG2	ENSG00000166862.6	chr22	36959968	37099603	-	37099471	37099711	3	Bivalent	Bivalent	none	No Meth/Exp-	no change
RP1-293L6.1	ENSG00000234688.1	chr22	37099963	37117517	+	37099471	37099711	3	Bivalent	Bivalent	none	No Meth/Exp-	no change
CARD10	ENSG00000100065.10	chr22	37886400	37915549	-	37914768	37915883	9	Bivalent	none	none	No Meth/Exp+	no change
SLC16A8	ENSG00000100156.6	chr22	38474141	38480100	-	38476836	38478839	5	none	none	none	No Meth/Exp-	no change
CTA-228A9.3	ENSG00000272720.1	chr22	38486134	38487566	+	38484615	38485721	4	none	none	none	No Meth/Exp-	no change
KDELR3	ENSG00000100196.6	chr22	38864067	38879452	+	38863881	38864263	4	Bivalent	Bivalent	H3K4me3	No Meth/Exp+	no change
CHADL	ENSG00000100399.11	chr22	41625517	41636938	-	41633520	41634842	4	none	none	H3K4me3	Meth+/Exp-	Methylable
TNFRSF13C	ENSG00000159958.3	chr22	42321045	42322822	-	42322043	42322909	2	Bivalent	none	H3K27me3	No Meth/Exp-	no change
CENPM	ENSG00000100162.10	chr22	42334725	42343168	-	42342407	42343278	7	none	H3K4me3	H3K4me3	No Meth/Exp+	no change
FAM109B	ENSG00000177096.4	chr22	42470255	42475445	+	42470035	42470669	3	none	none	none	No Meth/Exp+	no change
SCUBE1	ENSG00000159307.14	chr22	43593289	43739394	-	43738882	43740285	6	Bivalent	H3K27me3	H3K27me3	Meth+/Exp-	Methylable
GTSE1	ENSG00000075218.14	chr22	46692638	46726707	+	46692210	46693349	16	H3K4me3	H3K4me3	H3K4me3	No Meth/Exp+	no change
ADM2	ENSG00000128165.7	chr22	50919985	50924869	+	50919453	50920376	10	none	Bivalent	H3K27me3	Meth+/Exp+	Methylable
TYMP	ENSG00000025708.8	chr22	50964181	50968485	-	50963608	50970768	29	Bivalent	Bivalent	H3K4me3	Meth+/Exp+	Methylable
ODF3B	ENSG00000177989.9	chr22	50968139	50971009	-	50963608	50970768	29	Bivalent	Bivalent	H3K4me3	Meth+/Exp+	Methylable

## Sheet: IDHmut
Supplemental_Table_S2.xlsx List of affected CGI/promoter-controlled genes, identified in IDHmut glioma samples.
gene_name	gene_id	chr	start	end	strand	CpGi_Start	CpGi_End	CpGi_N_probes	Chromatin_ES	Chromatin_NPC	Chromatin_Brain	Defect_IDHmut	Methylation_IDHmut_vs_ctrl
RP11-54O7.1	ENSG00000230699.2	chr1	846815	850328	+	844299	845883	2	H3K27me3	none	H3K27me3	No Meth/Exp+	no change
TNFRSF4	ENSG00000186827.6	chr1	1146706	1149518	-	1149055	1149524	4	none	none	none	No Meth/Exp+	no change
ANKRD65	ENSG00000235098.4	chr1	1353800	1357149	-	1355159	1356000	2	none	none	none	Meth+/Exp-	Methylated
RP4-758J18.7	ENSG00000225905.1	chr1	1355625	1358071	+	1355159	1356000	2	none	none	none	Meth+/Exp-	Methylated
TMEM88B	ENSG00000205116.3	chr1	1361508	1363167	+	1361560	1361787	3	H3K4me3	none	H3K4me3	Meth+/Exp-	Methylated
VWA1	ENSG00000179403.10	chr1	1370241	1378262	+	1370767	1371449	3	none	H3K4me3	H3K4me3	Meth+/Exp-	Methylable
TMEM52	ENSG00000178821.8	chr1	1849029	1850712	-	1850098	1851391	16	none	Bivalent	none	Meth+/Exp-	Methylated
TPRG1L	ENSG00000158109.10	chr1	3541566	3546691	+	3540767	3542241	11	none	H3K4me3	H3K4me3	No Meth/Exp-	no change
TP73-AS1	ENSG00000227372.6	chr1	3652548	3663900	-	3662963	3664085	9	H3K4me3	H3K4me3	H3K4me3	Meth+/Exp-	Methylated
CLSTN1	ENSG00000171603.12	chr1	9789084	9884584	-	9883011	9884667	14	Bivalent	Bivalent	H3K4me3	Meth+/Exp-	Methylated
RBP7	ENSG00000162444.11	chr1	10057264	10076078	+	10057121	10058108	5	Bivalent	Bivalent	none	Meth+/Exp-	Methylated
DRAXIN	ENSG00000162490.6	chr1	11751786	11785914	+	11750701	11752651	10	none	H3K4me3	Bivalent	Meth+/Exp+	Methylated
FBLIM1	ENSG00000162458.8	chr1	16083102	16113089	+	16085147	16085862	4	none	none	none	No Meth/Exp+	no change
EPHA2	ENSG00000142627.9	chr1	16450832	16482582	-	16481484	16482782	9	none	H3K4me3	none	Meth+/Exp+	Methylated
MFAP2	ENSG00000117122.9	chr1	17300997	17307330	-	17306551	17307363	3	none	none	none	Meth+/Exp+	Methylable
CAMK2N1	ENSG00000162545.5	chr1	20808884	20812713	-	20810462	20813511	13	Bivalent	Bivalent	H3K4me3	No Meth/Exp-	no change
HSPG2	ENSG00000142798.12	chr1	22148738	22263790	-	22149683	22149897	4	none	none	none	No Meth/Exp+	no change
EPHB2	ENSG00000133216.12	chr1	23037332	23241818	+	23036823	23038362	6	none	Bivalent	H3K4me3	No Meth/Exp-	no change
E2F2	ENSG00000007968.6	chr1	23832922	23857712	-	23857033	23858089	10	Bivalent	H3K4me3	none	No Meth/Exp+	no change
PITHD1	ENSG00000057757.5	chr1	24104895	24114722	+	24104502	24105263	8	H3K4me3	H3K4me3	H3K4me3	No Meth/Exp-	no change
GRHL3	ENSG00000158055.11	chr1	24645812	24690972	+	24648202	24648985	5	Bivalent	H3K27me3	none	Meth+/Exp+	Methylable
NIPAL3	ENSG00000001461.12	chr1	24742284	24799466	+	24742671	24743039	3	H3K4me3	Bivalent	H3K4me3	Meth+/Exp-	Methylated
RCAN3	ENSG00000117602.7	chr1	24829387	24867530	+	24828865	24829878	10	none	Bivalent	none	No Meth/Exp-	no change
LDLRAP1	ENSG00000157978.7	chr1	25870071	25895377	+	25869893	25871042	11	none	H3K4me3	H3K4me3	Meth+/Exp-	Methylated
STMN1	ENSG00000117632.16	chr1	26210672	26233482	-	26231950	26233624	20	H3K4me3	H3K4me3	H3K4me3	Meth+/Exp-	Methylated
CEP85	ENSG00000130695.9	chr1	26560691	26605299	+	26560449	26561028	10	none	H3K4me3	H3K4me3	No Meth/Exp-	no change
RAB42	ENSG00000188060.6	chr1	28918712	28921955	+	28919041	28919454	3	none	H3K4me3	none	Meth+/Exp+	Methylable
ADC	ENSG00000142920.12	chr1	33546705	33586131	+	33546524	33547243	11	Bivalent	H3K4me3	H3K4me3	No Meth/Exp-	no change
C1orf94	ENSG00000142698.10	chr1	34632484	34684732	+	34642382	34643024	7	Bivalent	H3K27me3	none	Meth+/Exp+	Methylated
GJA4	ENSG00000187513.8	chr1	35258599	35261348	+	35258564	35258791	2	Bivalent	none	H3K4me3	Meth+/Exp+	Methylated
EVA1B	ENSG00000142694.6	chr1	36787632	36789755	-	36786500	36789402	12	Bivalent	H3K4me3	H3K4me3	Meth+/Exp+	Methylated
BMP8A	ENSG00000183682.7	chr1	39957318	39991607	+	39956424	39958137	15	Bivalent	Bivalent	H3K4me3	Meth+/Exp-	Methylated
HEYL	ENSG00000163909.6	chr1	40089825	40105617	-	40105010	40105707	6	Bivalent	H3K27me3	none	Meth+/Exp+	Methylated
MFSD2A	ENSG00000168389.13	chr1	40420802	40435638	+	40420487	40421366	14	Bivalent	none	H3K4me3	Meth+/Exp+	Methylable
ZMYND12	ENSG00000066185.8	chr1	42896000	42921938	-	42921716	42922575	7	H3K4me3	H3K4me3	H3K4me3	Meth+/Exp-	Methylated
RP1-92O14.3	ENSG00000234694.1	chr1	43820355	43824329	-	43824134	43825059	10	H3K4me3	H3K4me3	H3K4me3	No Meth/Exp-	no change
IPO13	ENSG00000117408.6	chr1	44412611	44433694	+	44412073	44412804	12	H3K4me3	H3K4me3	H3K4me3	No Meth/Exp-	no change
KIF2C	ENSG00000142945.8	chr1	45205490	45233439	+	45205323	45205745	4	H3K4me3	H3K4me3	H3K4me3	No Meth/Exp+	no change
HPDL	ENSG00000186603.4	chr1	45792545	45794347	+	45792419	45793301	9	none	none	H3K4me3	Meth+/Exp-	Methylated
TESK2	ENSG00000070759.12	chr1	45809555	45956872	-	45956345	45956893	5	H3K4me3	Bivalent	H3K4me3	No Meth/Exp-	no change
LURAP1	ENSG00000171357.5	chr1	46669006	46686933	+	46668821	46669258	5	none	H3K4me3	H3K4me3	No Meth/Exp-	no change
FAAH	ENSG00000117480.11	chr1	46859937	46879520	+	46859724	46860291	6	Bivalent	Bivalent	H3K4me3	No Meth/Exp-	no change
DMRTA2	ENSG00000142700.7	chr1	50883222	50889172	-	50884228	50891471	36	Bivalent	Bivalent	Bivalent	Meth+/Exp-	Methylated
EPS15	ENSG00000085832.12	chr1	51819935	51985000	-	51984547	51985216	7	H3K4me3	none	H3K4me3	Meth+/Exp-	Methylated
RP11-191G24.1	ENSG00000227070.1	chr1	51983981	52027301	+	51984547	51985216	7	H3K4me3	none	H3K4me3	Meth+/Exp-	Methylated
ACOT11	ENSG00000162390.13	chr1	55007930	55104865	+	55007704	55008448	9	none	Bivalent	H3K4me3	Meth+/Exp-	Methylated
DHCR24	ENSG00000116133.7	chr1	55315306	55352891	-	55352463	55353328	9	H3K4me3	H3K4me3	H3K4me3	No Meth/Exp-	no change
TACSTD2	ENSG00000184292.5	chr1	59041099	59043166	-	59042013	59043295	12	Bivalent	none	none	Meth+/Exp-	Methylated
RP4-794H19.2	ENSG00000234807.4	chr1	59250823	59365384	+	59247461	59250940	24	Bivalent	Bivalent	H3K4me3	No Meth/Exp-	no change
CYP2J2	ENSG00000134716.5	chr1	60358980	60392462	-	60392272	60392583	5	Bivalent	H3K27me3	Bivalent	No Meth/Exp-	no change
GADD45A	ENSG00000116717.7	chr1	68150744	68154021	+	68150913	68152270	6	H3K4me3	H3K4me3	H3K4me3	No Meth/Exp+	no change
AK5	ENSG00000154027.14	chr1	77747736	78025651	+	77747314	77748224	9	Bivalent	Bivalent	H3K4me3	Meth+/Exp-	Methylable
ELTD1	ENSG00000162618.8	chr1	79355449	79472403	-	79472281	79472537	7	none	H3K4me3	none	Meth+/Exp+	Methylated
RP11-475O6.1	ENSG00000233008.1	chr1	84041459	84326706	-	84326267	84326838	6	none	none	H3K4me3	Meth+/Exp-	Methylated
TTLL7	ENSG00000137941.12	chr1	84330711	84464833	-	84464223	84465232	5	Bivalent	Bivalent	H3K4me3	No Meth/Exp-	no change
PRKACB	ENSG00000142875.15	chr1	84543745	84704181	+	84543146	84544261	8	H3K4me3	H3K4me3	H3K4me3	No Meth/Exp-	no change
SSX2IP	ENSG00000117155.12	chr1	85109390	85156486	-	85155605	85156574	8	H3K4me3	none	H3K4me3	No Meth/Exp-	no change
LPAR3	ENSG00000171517.5	chr1	85277285	85358896	-	85358359	85359187	5	Bivalent	none	none	No Meth/Exp-	no change
LRRC8B	ENSG00000197147.8	chr1	89990395	90063423	+	89989810	89990986	8	H3K4me3	Bivalent	H3K4me3	No Meth/Exp-	no change
RP5-1007M22.2	ENSG00000231999.2	chr1	90048800	90098453	-	90098230	90099292	5	Bivalent	Bivalent	H3K4me3	No Meth/Exp-	no change
RP4-665J23.2	ENSG00000225446.1	chr1	91317316	91319843	+	91316249	91317390	7	Bivalent	none	none	Meth+/Exp-	Methylated
TMEM56	ENSG00000152078.5	chr1	95582894	95663163	+	95582750	95583572	8	Bivalent	Bivalent	H3K4me3	No Meth/Exp-	no change
RP11-57H12.3	ENSG00000226026.1	chr1	95628775	95699538	-	95699725	95700142	5	H3K4me3	none	H3K4me3	No Meth/Exp-	no change
HENMT1	ENSG00000162639.11	chr1	109190912	109204148	-	109203593	109204378	7	none	H3K27me3	H3K4me3	Meth+/Exp-	Methylated
STXBP3	ENSG00000116266.6	chr1	109289296	109352148	+	109289018	109289822	7	H3K4me3	H3K4me3	H3K4me3	No Meth/Exp-	no change
WDR47	ENSG00000085433.11	chr1	109512836	109584850	-	109583855	109585032	12	H3K4me3	H3K4me3	H3K4me3	No Meth/Exp-	no change
SORT1	ENSG00000134243.7	chr1	109852192	109940573	-	109940074	109940894	3	H3K4me3	H3K4me3	H3K4me3	No Meth/Exp-	no change
KCNA2	ENSG00000177301.9	chr1	111136202	111174096	-	111148983	111150186	7	Bivalent	Bivalent	H3K4me3	No Meth/Exp-	no change
PPM1J	ENSG00000155367.11	chr1	113252616	113258099	-	113256885	113258149	8	Bivalent	Bivalent	H3K4me3	Meth+/Exp-	Methylable
SLC22A15	ENSG00000163393.8	chr1	116519119	116612675	+	116518757	116519537	10	none	Bivalent	H3K4me3	Meth+/Exp-	Methylable
RP11-344P13.6	ENSG00000272583.1	chr1	121260164	121260627	-	121260857	121261525	5	none	Bivalent	H3K4me3	Meth+/Exp-	Methylable
HIST2H3D	ENSG00000183598.3	chr1	149784826	149785236	-	149784592	149785212	3	H3K4me3	H3K4me3	none	No Meth/Exp+	no change
ADAMTSL4-AS1	ENSG00000203804.3	chr1	150533480	150533969	-	150534075	150534301	3	H3K4me3	H3K4me3	H3K4me3	No Meth/Exp+	no change
CERS2	ENSG00000143418.15	chr1	150933059	150947479	-	150946496	150947950	9	H3K4me3	H3K4me3	H3K4me3	No Meth/Exp-	no change
RP11-126K1.6	ENSG00000237976.1	chr1	151319443	151320503	+	151319326	151319545	3	H3K4me3	H3K4me3	H3K4me3	No Meth/Exp+	no change
C2CD4D	ENSG00000225556.1	chr1	151810295	151813033	-	151812253	151812525	3	Bivalent	none	Bivalent	Meth+/Exp-	Methylable
NPR1	ENSG00000169418.9	chr1	153651113	153666468	+	153650830	153652375	15	Bivalent	Bivalent	Bivalent	Meth+/Exp+	Methylable
MUC1	ENSG00000185499.12	chr1	155158300	155162707	-	155163434	155163818	3	H3K4me3	H3K4me3	H3K4me3	No Meth/Exp+	no change
IQGAP3	ENSG00000183856.6	chr1	156495197	156542396	-	156542099	156542502	5	H3K4me3	none	H3K4me3	No Meth/Exp+	no change
HAPLN2	ENSG00000132702.8	chr1	156589086	156595517	+	156593657	156595283	7	Bivalent	Bivalent	H3K4me3	Meth+/Exp-	Methylated
RP11-284F21.9	ENSG00000272068.1	chr1	156607575	156610796	-	156611639	156612447	3	Bivalent	none	H3K4me3	No Meth/Exp+	no change
NES	ENSG00000132688.10	chr1	156638555	156647189	-	156646292	156647260	8	none	none	none	Meth+/Exp+	Methylated
KIRREL	ENSG00000183853.13	chr1	157963063	158070052	+	157963540	157963947	3	H3K4me3	H3K4me3	H3K4me3	No Meth/Exp+	no change
C1orf204	ENSG00000188004.5	chr1	159804264	159825137	-	159824006	159825011	6	Bivalent	H3K27me3	H3K4me3	Meth+/Exp-	Methylated
IGSF8	ENSG00000162729.9	chr1	160061130	160068733	-	160068040	160068430	4	H3K4me3	none	H3K4me3	No Meth/Exp-	no change
ATP1B1	ENSG00000143153.8	chr1	169074935	169101960	+	169074766	169076411	9	none	none	none	No Meth/Exp-	no change
PRRX1	ENSG00000116132.7	chr1	170631869	170708560	+	170633274	170634178	5	Bivalent	Bivalent	Bivalent	No Meth/Exp+	no change
KIAA0040	ENSG00000235750.5	chr1	175126123	175162135	-	175161900	175162364	8	Bivalent	Bivalent	none	Meth+/Exp+	Methylated
RP11-545A16.3	ENSG00000227141.2	chr1	179555840	179558310	+	179555401	179555770	3	none	H3K27me3	H3K4me3	No Meth/Exp+	no change
KIAA1614	ENSG00000135835.6	chr1	180882290	180920750	+	180881316	180882592	5	Bivalent	Bivalent	H3K4me3	Meth+/Exp-	Methylated
LAMC1	ENSG00000135862.5	chr1	182992595	183114727	+	182991804	182993370	6	H3K4me3	H3K4me3	H3K4me3	No Meth/Exp+	no change
FAM129A	ENSG00000135842.12	chr1	184759858	184943682	-	184942862	184943777	7	Bivalent	Bivalent	none	Meth+/Exp+	Methylable
HMCN1	ENSG00000143341.7	chr1	185703683	186160085	+	185703458	185703662	7	Bivalent	Bivalent	Bivalent	No Meth/Exp+	no change
KIF14	ENSG00000118193.7	chr1	200520628	200589862	-	200589552	200590124	7	H3K4me3	H3K4me3	H3K4me3	No Meth/Exp+	no change
CSRP1	ENSG00000159176.9	chr1	201452658	201478584	-	201475885	201476516	7	Bivalent	H3K4me3	H3K4me3	Meth+/Exp-	Methylated
RP11-134G8.7	ENSG00000224536.1	chr1	201476369	201502736	+	201475885	201476516	7	Bivalent	H3K4me3	H3K4me3	Meth+/Exp-	Methylated
ADORA1	ENSG00000163485.11	chr1	203059782	203136533	+	203097233	203097496	4	Bivalent	Bivalent	H3K4me3	No Meth/Exp-	no change
PIK3C2B	ENSG00000133056.9	chr1	204391756	204463852	-	204463293	204464086	3	none	none	H3K4me3	No Meth/Exp-	no change
PM20D1	ENSG00000162877.8	chr1	205797150	205819260	-	205818898	205819191	3	none	none	none	Meth+/Exp-	Methylated
FAIM3	ENSG00000162894.7	chr1	207077731	207096592	-	207082693	207083202	4	Bivalent	none	none	No Meth/Exp+	no change
CD55	ENSG00000196352.9	chr1	207494853	207534311	+	207494543	207495364	7	H3K4me3	Bivalent	H3K4me3	No Meth/Exp-	no change
SERTAD4	ENSG00000082497.7	chr1	210406144	210419976	+	210405952	210407250	2	Bivalent	Bivalent	none	No Meth/Exp-	no change
LPGAT1	ENSG00000123684.8	chr1	211916799	212004114	-	212003431	212004280	7	Bivalent	none	H3K4me3	No Meth/Exp-	no change
DTL	ENSG00000143476.13	chr1	212208919	212280742	+	212208837	212209364	7	H3K4me3	H3K4me3	H3K4me3	No Meth/Exp+	no change
CENPF	ENSG00000117724.8	chr1	214776538	214837931	+	214776256	214776935	13	H3K4me3	H3K4me3	H3K4me3	No Meth/Exp+	no change
DUSP10	ENSG00000143507.13	chr1	221874766	221915518	-	221915474	221916804	11	H3K4me3	none	none	No Meth/Exp-	no change
TMEM63A	ENSG00000196187.7	chr1	226033237	226070069	-	226069605	226070898	12	none	H3K4me3	H3K4me3	Meth+/Exp-	Methylated
LEFTY2	ENSG00000143768.7	chr1	226124298	226129189	-	226127112	226127695	3	none	H3K27me3	none	Meth+/Exp+	Methylated
RHOU	ENSG00000116574.4	chr1	228870824	228882416	+	228870810	228872297	11	Bivalent	Bivalent	H3K4me3	Meth+/Exp-	Methylable
KCNK1	ENSG00000135750.10	chr1	233749750	233808258	+	233749373	233750314	9	Bivalent	none	H3K4me3	No Meth/Exp-	no change
NID1	ENSG00000116962.10	chr1	236139130	236228462	-	236227682	236228817	8	Bivalent	Bivalent	none	Meth+/Exp+	Methylable
RYR2	ENSG00000198626.11	chr1	237205505	237997288	+	237205126	237206644	8	Bivalent	Bivalent	none	Meth+/Exp-	Methylable
CHRM3	ENSG00000133019.7	chr1	239549865	240078750	+	239550108	239551339	9	Bivalent	Bivalent	none	No Meth/Exp-	no change
OPN3	ENSG00000054277.8	chr1	241753404	241840678	-	241802960	241803649	4	H3K4me3	H3K4me3	H3K4me3	No Meth/Exp-	no change
EXO1	ENSG00000174371.12	chr1	242011269	242058450	+	242011151	242011744	9	H3K4me3	H3K4me3	H3K4me3	No Meth/Exp+	no change
PXDN	ENSG00000130508.6	chr2	1635659	1748624	-	1746833	1748971	11	H3K4me3	H3K4me3	H3K4me3	Meth+/Exp+	Methylated
SOX11	ENSG00000176887.5	chr2	5832799	5841516	+	5832041	5834208	7	Bivalent	H3K4me3	none	No Meth/Exp+	no change
RRM2	ENSG00000171848.9	chr2	10262455	10271545	+	10262173	10263481	10	H3K4me3	H3K4me3	none	No Meth/Exp+	no change
ATP6V1C2	ENSG00000143882.5	chr2	10861775	10925236	+	10861206	10862382	8	Bivalent	Bivalent	none	No Meth/Exp-	no change
MATN3	ENSG00000132031.8	chr2	20191872	20212455	-	20212067	20212783	9	Bivalent	none	H3K27me3	Meth+/Exp+	Methylated
APOB	ENSG00000084674.9	chr2	21224301	21266945	-	21266669	21266961	5	Bivalent	H3K27me3	none	Meth+/Exp-	Methylated
TP53I3	ENSG00000115129.9	chr2	24300303	24308731	-	24307026	24307678	4	H3K4me3	H3K4me3	H3K4me3	No Meth/Exp+	no change
DRC1	ENSG00000157856.6	chr2	26624784	26679579	+	26624603	26625057	9	none	H3K4me3	H3K4me3	Meth+/Exp-	Methylated
DPYSL5	ENSG00000157851.12	chr2	27070615	27173219	+	27070302	27072922	11	Bivalent	none	none	Meth+/Exp-	Methylated
EMILIN1	ENSG00000138080.9	chr2	27301435	27309271	+	27305312	27305612	3	none	none	none	No Meth/Exp+	no change
STRN	ENSG00000115808.7	chr2	37070783	37193615	-	37193131	37194287	4	H3K4me3	H3K4me3	H3K4me3	No Meth/Exp-	no change
CYP1B1-AS1	ENSG00000232973.7	chr2	38302791	38408997	+	38301276	38304518	27	Bivalent	Bivalent	Bivalent	Meth+/Exp-	Methylated
AC019171.1	ENSG00000269210.1	chr2	39186764	39187483	-	39186777	39187968	6	H3K27me3	none	H3K4me3	Meth+/Exp-	Methylated
STON1-GTF2A1L	ENSG00000068781.16	chr2	48757064	49003654	+	48757211	48757785	4	H3K4me3	H3K4me3	H3K4me3	No Meth/Exp+	no change
RTN4	ENSG00000115310.13	chr2	55199325	55339757	-	55276555	55278044	6	H3K4me3	H3K4me3	H3K4me3	No Meth/Exp-	no change
AC012358.4	ENSG00000227799.1	chr2	55451416	55453044	+	55450616	55450931	3	none	none	H3K4me3	Meth+/Exp-	Methylated
VRK2	ENSG00000028116.12	chr2	58134786	58387055	+	58273642	58274422	6	H3K4me3	none	H3K4me3	Meth+/Exp-	Methylated
ANTXR1	ENSG00000169604.15	chr2	69240310	69476459	+	69240083	69241004	10	none	none	Bivalent	No Meth/Exp+	no change
ASPRV1	ENSG00000244617.1	chr2	70187226	70189397	-	70188511	70188726	4	none	none	none	Meth+/Exp-	Methylated
TGFA	ENSG00000163235.11	chr2	70674412	70781325	-	70780049	70781577	14	Bivalent	Bivalent	Bivalent	No Meth/Exp-	no change
VAX2	ENSG00000116035.2	chr2	71127720	71160576	+	71126720	71129209	25	Bivalent	Bivalent	Bivalent	Meth+/Exp+	Methylated
AC007040.11	ENSG00000258881.2	chr2	71166448	71222466	-	71221520	71222299	8	H3K4me3	H3K4me3	H3K4me3	No Meth/Exp+	no change
PAIP2B	ENSG00000124374.8	chr2	71409869	71454213	-	71453588	71454318	7	H3K4me3	Bivalent	H3K4me3	No Meth/Exp-	no change
MTHFD2	ENSG00000065911.7	chr2	74425689	74444692	+	74425444	74426423	11	H3K4me3	H3K4me3	H3K4me3	No Meth/Exp+	no change
RP11-259N19.1	ENSG00000272711.1	chr2	75059782	75061114	-	75060879	75062664	9	H3K4me3	H3K4me3	Bivalent	Meth+/Exp+	Methylable
ATOH8	ENSG00000168874.8	chr2	85978467	86015189	+	85980499	85982198	14	Bivalent	none	none	No Meth/Exp+	no change
ANKRD36BP2	ENSG00000230006.3	chr2	89065324	89106126	+	89064493	89065513	10	Bivalent	Bivalent	Bivalent	Meth+/Exp-	Methylated
AC103563.8	ENSG00000233850.1	chr2	95690938	95692454	-	95690857	95692431	9	Bivalent	Bivalent	Bivalent	Meth+/Exp-	Methylated
MAL	ENSG00000172005.6	chr2	95691422	95719737	+	95690857	95692431	9	Bivalent	Bivalent	Bivalent	Meth+/Exp-	Methylated
FAHD2CP	ENSG00000231584.4	chr2	96676299	96689128	+	96676160	96676733	2	H3K4me3	H3K4me3	H3K4me3	Meth+/Exp-	Methylable
AC021188.4	ENSG00000230747.1	chr2	96973001	96987469	-	96987027	96987888	4	Bivalent	H3K4me3	Bivalent	No Meth/Exp+	no change
NCAPH	ENSG00000121152.5	chr2	97001525	97039583	+	97001429	97001898	4	H3K4me3	H3K4me3	H3K4me3	No Meth/Exp+	no change
FAM178B	ENSG00000168754.9	chr2	97541620	97684175	-	97651764	97652441	4	none	none	none	No Meth/Exp-	no change
FAHD2B	ENSG00000144199.7	chr2	97749320	97760619	-	97760184	97760756	7	H3K4me3	H3K4me3	H3K4me3	Meth+/Exp-	Methylated
IL1R1	ENSG00000115594.7	chr2	102681004	102796334	+	102758806	102759577	2	Bivalent	H3K27me3	Bivalent	No Meth/Exp+	no change
IL18R1	ENSG00000115604.6	chr2	102927989	103015218	+	102972118	102972596	3	Bivalent	none	H3K4me3	No Meth/Exp+	no change
AC010884.1	ENSG00000224509.1	chr2	105552869	105654954	-	105654249	105654771	8	H3K4me3	H3K4me3	H3K4me3	No Meth/Exp-	no change
CKAP2L	ENSG00000169607.8	chr2	113493930	113522254	-	113521918	113522574	10	H3K4me3	H3K4me3	H3K4me3	No Meth/Exp+	no change
C1QL2	ENSG00000144119.3	chr2	119913819	119916465	-	119914126	119916663	15	Bivalent	H3K27me3	Bivalent	Meth+/Exp-	Methylated
BIN1	ENSG00000136717.10	chr2	127805603	127864931	-	127863642	127865288	10	Bivalent	none	H3K4me3	Meth+/Exp-	Methylable
AC079776.2	ENSG00000214100.4	chr2	130680435	130691890	-	130691702	130692102	5	none	H3K27me3	none	No Meth/Exp-	no change
RAB6C	ENSG00000222014.4	chr2	130737235	130740311	+	130737205	130737718	3	Bivalent	none	none	No Meth/Exp-	no change
AC073869.20	ENSG00000217950.3	chr2	132200167	132202467	-	132202265	132203257	7	none	none	none	No Meth/Exp-	no change
AC093391.2	ENSG00000231890.3	chr2	136742746	136779888	+	136742687	136743595	8	H3K4me3	H3K4me3	H3K4me3	No Meth/Exp+	no change
KIF5C	ENSG00000168280.12	chr2	149632819	149883273	+	149632682	149633882	8	H3K4me3	H3K4me3	H3K4me3	No Meth/Exp-	no change
FMNL2	ENSG00000157827.15	chr2	153191751	153506348	+	153191492	153192974	11	H3K4me3	H3K4me3	H3K4me3	No Meth/Exp-	no change
GCA	ENSG00000115271.6	chr2	163175350	163228105	+	163200575	163201025	5	H3K4me3	none	H3K4me3	No Meth/Exp-	no change
SPC25	ENSG00000152253.4	chr2	169690642	169769881	-	169746719	169747005	6	H3K4me3	none	none	No Meth/Exp+	no change
LRP2	ENSG00000081479.8	chr2	169983619	170219195	-	170218314	170219203	5	Bivalent	H3K4me3	Bivalent	No Meth/Exp-	no change
CDCA7	ENSG00000144354.9	chr2	174219548	174233725	+	174219533	174220368	4	none	H3K4me3	Bivalent	No Meth/Exp+	no change
HOXD-AS2	ENSG00000237380.2	chr2	176986339	177001826	-	177001221	177001783	3	Bivalent	none	H3K27me3	Meth+/Exp+	Methylable
AC009336.24	ENSG00000226363.3	chr2	177042445	177043736	+	177042751	177043444	5	Bivalent	none	none	Meth+/Exp-	Methylable
AC017048.4	ENSG00000224577.1	chr2	177502438	177520686	+	177502240	177502910	5	Bivalent	Bivalent	none	Meth+/Exp+	Methylated
PDE11A	ENSG00000128655.12	chr2	178487980	178973066	-	178937595	178937907	6	Bivalent	Bivalent	Bivalent	No Meth/Exp-	no change
ITGA4	ENSG00000115232.9	chr2	182321929	182400914	+	182321761	182323029	9	Bivalent	Bivalent	none	Meth+/Exp+	Methylated
SLC40A1	ENSG00000138449.6	chr2	190425305	190448484	-	190445459	190445983	5	Bivalent	Bivalent	none	No Meth/Exp+	no change
MFSD6	ENSG00000151690.10	chr2	191273081	191373931	+	191272484	191273671	5	Bivalent	Bivalent	H3K4me3	No Meth/Exp-	no change
AC093388.3	ENSG00000233654.1	chr2	191399581	191432828	+	191399089	191399742	3	H3K4me3	H3K4me3	H3K4me3	Meth+/Exp-	Methylable
STK17B	ENSG00000081320.6	chr2	196998290	197041227	-	197035589	197036383	4	none	none	H3K4me3	No Meth/Exp+	no change
HECW2	ENSG00000138411.6	chr2	197059094	197458416	-	197457392	197458522	10	Bivalent	none	H3K4me3	Meth+/Exp-	Methylable
PLCL1	ENSG00000115896.11	chr2	198669426	199437305	+	198669079	198670154	8	Bivalent	Bivalent	H3K4me3	No Meth/Exp-	no change
ALS2CR11	ENSG00000155754.10	chr2	202352148	202483901	-	202483584	202483957	3	none	none	none	No Meth/Exp-	no change
LANCL1	ENSG00000115365.7	chr2	211295973	211342376	-	211341181	211341536	7	H3K4me3	H3K4me3	H3K4me3	No Meth/Exp-	no change
AC072062.1	ENSG00000229267.2	chr2	215674953	215827998	+	215673995	215675052	8	H3K4me3	H3K4me3	H3K4me3	No Meth/Exp+	no change
FN1	ENSG00000115414.14	chr2	216225163	216300895	-	216300267	216300997	6	none	H3K4me3	none	No Meth/Exp+	no change
TMBIM1	ENSG00000135926.8	chr2	219138915	219157309	-	219156977	219157380	7	none	H3K27me3	H3K4me3	Meth+/Exp-	Methylated
CYP27A1	ENSG00000135929.4	chr2	219646472	219680016	+	219646432	219647181	4	Bivalent	Bivalent	none	Meth+/Exp-	Methylated
DNAJB2	ENSG00000135924.11	chr2	220143989	220151622	+	220143879	220144633	6	none	H3K4me3	H3K4me3	No Meth/Exp-	no change
RP11-316O14.1	ENSG00000268603.1	chr2	220362333	220362968	-	220361462	220363254	11	Bivalent	none	none	Meth+/Exp+	Methylated
SLC19A3	ENSG00000135917.9	chr2	228549926	228582728	-	228582485	228582821	8	none	none	H3K4me3	No Meth/Exp+	no change
HJURP	ENSG00000123485.7	chr2	234742062	234763212	-	234762496	234763579	12	H3K4me3	H3K4me3	H3K4me3	No Meth/Exp+	no change
AC016757.3	ENSG00000186235.6	chr2	239133193	239140318	-	239140096	239140659	11	Bivalent	none	none	Meth+/Exp-	Methylated
HES6	ENSG00000144485.6	chr2	239146908	239149303	-	239147592	239149900	9	none	H3K4me3	none	No Meth/Exp+	no change
BOK	ENSG00000176720.3	chr2	242498136	242513546	+	242498013	242499274	7	H3K4me3	Bivalent	H3K4me3	Meth+/Exp-	Methylated
SGOL1	ENSG00000129810.10	chr3	20202085	20227784	-	20227289	20227956	10	H3K4me3	none	H3K4me3	No Meth/Exp+	no change
LINC00693	ENSG00000228214.2	chr3	28616282	28799831	+	28616663	28617970	6	Bivalent	Bivalent	Bivalent	No Meth/Exp+	no change
MOBP	ENSG00000168314.13	chr3	39508689	39570970	+	39543771	39544223	3	none	none	none	No Meth/Exp-	no change
KIF15	ENSG00000163808.12	chr3	44803209	44914868	+	44802852	44803618	14	H3K4me3	H3K4me3	H3K4me3	No Meth/Exp+	no change
LIMD1	ENSG00000144791.5	chr3	45596886	45727830	+	45635090	45635932	6	H3K4me3	H3K4me3	none	Meth+/Exp+	Methylated
CDC25A	ENSG00000164045.7	chr3	48198636	48229892	-	48229077	48230285	5	H3K4me3	H3K4me3	H3K4me3	No Meth/Exp+	no change
GPR62	ENSG00000180929.4	chr3	51989330	51991509	+	51989763	51990639	4	Bivalent	none	H3K4me3	Meth+/Exp-	Methylated
STAB1	ENSG00000010327.6	chr3	52529354	52558511	+	52552722	52553384	2	none	none	none	No Meth/Exp+	no change
PXK	ENSG00000168297.11	chr3	58318607	58411748	+	58318398	58319192	6	none	H3K4me3	H3K4me3	No Meth/Exp-	no change
FAM19A4	ENSG00000163377.10	chr3	68780917	68981761	-	68980783	68982035	10	Bivalent	Bivalent	none	Meth+/Exp-	Methylated
RYBP	ENSG00000163602.9	chr3	72420976	72496069	-	72495853	72496852	8	H3K4me3	none	H3K4me3	Meth+/Exp-	Methylable
PROS1	ENSG00000184500.10	chr3	93591881	93692910	-	93692554	93692783	3	Bivalent	H3K4me3	H3K4me3	No Meth/Exp+	no change
CLDND1	ENSG00000080822.12	chr3	98216756	98241910	-	98241409	98241711	6	H3K4me3	H3K4me3	H3K4me3	No Meth/Exp-	no change
CPOX	ENSG00000080819.2	chr3	98239976	98312567	-	98311909	98312696	10	none	H3K4me3	H3K4me3	No Meth/Exp-	no change
NXPE3	ENSG00000144815.10	chr3	101498046	101547073	+	101497830	101498648	11	none	H3K4me3	H3K4me3	No Meth/Exp-	no change
BOC	ENSG00000144857.10	chr3	112929850	113006303	+	112930437	112931506	11	Bivalent	H3K4me3	Bivalent	No Meth/Exp+	no change
SIDT1	ENSG00000072858.6	chr3	113251143	113348425	+	113251699	113252290	5	Bivalent	Bivalent	Bivalent	Meth+/Exp-	Methylated
ZDHHC23	ENSG00000184307.9	chr3	113666748	113684248	+	113666359	113667390	8	none	Bivalent	H3K4me3	No Meth/Exp-	no change
ARHGAP31	ENSG00000031081.6	chr3	119013220	119139561	+	119012891	119013724	8	Bivalent	Bivalent	H3K4me3	No Meth/Exp+	no change
ARHGAP31-AS1	ENSG00000241155.1	chr3	119033140	119041607	-	119041382	119042255	4	none	H3K4me3	H3K4me3	No Meth/Exp+	no change
FSTL1	ENSG00000163430.5	chr3	120111140	120170100	-	120169202	120170519	6	H3K4me3	H3K4me3	H3K4me3	Meth+/Exp+	Methylated
POLQ	ENSG00000051341.9	chr3	121150278	121264853	-	121264469	121264943	9	H3K4me3	H3K4me3	H3K4me3	No Meth/Exp+	no change
ADCY5	ENSG00000173175.10	chr3	123001143	123168605	-	123166218	123168567	11	Bivalent	Bivalent	H3K4me3	Meth+/Exp-	Methylated
GATA2	ENSG00000179348.7	chr3	128198270	128212028	-	128205495	128212274	29	Bivalent	Bivalent	Bivalent	Meth+/Exp+	Methylated
RP11-475N22.4	ENSG00000244300.2	chr3	128208055	128221191	+	128205495	128212274	29	Bivalent	Bivalent	Bivalent	Meth+/Exp+	Methylated
TMCC1-AS1	ENSG00000271270.1	chr3	129612714	129637418	+	129611920	129612884	4	H3K4me3	H3K4me3	H3K4me3	No Meth/Exp+	no change
CPNE4	ENSG00000196353.7	chr3	131252399	132004254	-	131753880	131754139	4	Bivalent	none	Bivalent	No Meth/Exp-	no change
TF	ENSG00000091513.10	chr3	133464800	133497850	+	133464949	133465420	3	none	H3K27me3	none	No Meth/Exp-	no change
DZIP1L	ENSG00000158163.10	chr3	137780832	137834660	-	137833848	137834592	8	H3K4me3	H3K4me3	H3K4me3	No Meth/Exp+	no change
RP11-548O1.3	ENSG00000244578.1	chr3	138654031	138662862	-	138663718	138666346	14	Bivalent	Bivalent	none	Meth+/Exp+	Methylated
FOXL2	ENSG00000183770.5	chr3	138663066	138665982	-	138663718	138666346	14	Bivalent	Bivalent	none	Meth+/Exp+	Methylated
NMNAT3	ENSG00000163864.10	chr3	139279022	139396859	-	139396338	139396882	4	Bivalent	H3K27me3	H3K4me3	Meth+/Exp-	Methylated
C3orf58	ENSG00000181744.4	chr3	143690640	143767561	+	143689733	143692279	19	H3K4me3	H3K4me3	H3K4me3	No Meth/Exp-	no change
RNF13	ENSG00000082996.15	chr3	149530495	149679926	+	149530293	149531234	7	H3K4me3	H3K4me3	H3K4me3	Meth+/Exp-	Methylable
VEPH1	ENSG00000197415.7	chr3	156977531	157251408	-	157155267	157155826	4	Bivalent	H3K4me3	none	No Meth/Exp+	no change
PTX3	ENSG00000163661.3	chr3	157154578	157161417	+	157155267	157155826	4	Bivalent	H3K4me3	none	No Meth/Exp+	no change
IQCJ-SCHIP1	ENSG00000250588.2	chr3	158680024	159615155	+	159480946	159483023	8	H3K4me3	Bivalent	H3K4me3	Meth+/Exp-	Methylated
RP11-432B6.3	ENSG00000248710.1	chr3	159945241	160167617	-	160167184	160168200	14	H3K4me3	Bivalent	Bivalent	Meth+/Exp-	Methylated
IFT80	ENSG00000068885.10	chr3	159974774	160117668	-	160117012	160118878	16	H3K4me3	H3K4me3	Bivalent	No Meth/Exp-	no change
TRIM59	ENSG00000213186.3	chr3	160150233	160203561	-	160167184	160168200	14	H3K4me3	Bivalent	Bivalent	Meth+/Exp-	Methylated
SERPINI1	ENSG00000163536.8	chr3	167453031	167543356	+	167452376	167452830	8	H3K4me3	none	H3K4me3	No Meth/Exp-	no change
EGFEM1P	ENSG00000206120.7	chr3	167967310	168548387	+	167967246	167968130	5	Bivalent	H3K4me3	none	No Meth/Exp+	no change
CLDN11	ENSG00000013297.6	chr3	170136653	170578169	+	170136242	170137886	14	Bivalent	none	none	Meth+/Exp-	Methylated
RPL22L1	ENSG00000163584.13	chr3	170582664	170588272	-	170587936	170588270	7	H3K4me3	H3K4me3	H3K4me3	No Meth/Exp+	no change
PLD1	ENSG00000075651.11	chr3	171318195	171528740	-	171527617	171528458	3	Bivalent	Bivalent	H3K4me3	No Meth/Exp-	no change
PP13439	ENSG00000183657.2	chr3	171509580	171527714	-	171527617	171528458	3	Bivalent	Bivalent	H3K4me3	No Meth/Exp-	no change
PEX5L	ENSG00000114757.14	chr3	179512746	179754841	-	179754520	179755245	9	Bivalent	Bivalent	H3K4me3	No Meth/Exp-	no change
LAMP3	ENSG00000078081.3	chr3	182840001	182881627	-	182880277	182880722	5	Bivalent	none	none	Meth+/Exp+	Methylable
MAP6D1	ENSG00000180834.3	chr3	183533664	183543382	-	183542496	183543804	6	H3K4me3	H3K4me3	H3K4me3	Meth+/Exp-	Methylable
RP11-573D15.6	ENSG00000230951.1	chr3	186490378	186491265	+	186490602	186490813	4	none	H3K27me3	H3K4me3	Meth+/Exp-	Methylated
LEPREL1	ENSG00000090530.5	chr3	189674517	189840226	-	189838080	189838879	5	none	H3K4me3	H3K4me3	Meth+/Exp-	Methylable
LEPREL1-AS1	ENSG00000225764.1	chr3	189838753	189862635	+	189838080	189838879	5	none	H3K4me3	H3K4me3	Meth+/Exp-	Methylable
CLDN16	ENSG00000113946.3	chr3	190040330	190129932	+	190039817	190040465	6	Bivalent	Bivalent	H3K4me3	No Meth/Exp-	no change
GMNC	ENSG00000205835.4	chr3	190570666	190610218	-	190580504	190580899	5	Bivalent	Bivalent	H3K4me3	No Meth/Exp-	no change
AC124944.5	ENSG00000223783.1	chr3	195563064	195587275	-	195564747	195565017	3	none	H3K27me3	none	No Meth/Exp+	no change
TNK2-AS1	ENSG00000224614.1	chr3	195634947	195638128	+	195635359	195636895	5	none	none	H3K4me3	No Meth/Exp+	no change
BDH1	ENSG00000161267.7	chr3	197236654	197300194	-	197281605	197283128	6	none	none	H3K4me3	Meth+/Exp-	Methylated
TACC3	ENSG00000013810.14	chr4	1723227	1746898	+	1722179	1723850	7	H3K4me3	H3K4me3	H3K4me3	No Meth/Exp+	no change
RP11-586D19.1	ENSG00000249896.1	chr4	6202460	6240044	+	6200912	6202724	10	Bivalent	none	H3K4me3	No Meth/Exp-	no change
SORCS2	ENSG00000184985.12	chr4	7194265	7744554	+	7194537	7195467	4	Bivalent	H3K27me3	H3K4me3	Meth+/Exp-	Methylated
ABLIM2	ENSG00000163995.14	chr4	7967039	8160559	-	8159728	8160893	11	Bivalent	none	H3K4me3	No Meth/Exp-	no change
CPEB2	ENSG00000137449.11	chr4	15004298	15071777	+	15003059	15006761	21	Bivalent	Bivalent	H3K4me3	No Meth/Exp-	no change
QDPR	ENSG00000151552.7	chr4	17461884	17513857	-	17513309	17513981	7	none	none	H3K4me3	No Meth/Exp-	no change
NCAPG	ENSG00000109805.5	chr4	17812525	17846485	+	17811954	17813227	11	H3K4me3	H3K4me3	H3K4me3	No Meth/Exp+	no change
ARAP2	ENSG00000047365.7	chr4	35949843	36246131	-	36245631	36246389	4	Bivalent	Bivalent	H3K4me3	No Meth/Exp-	no change
LIMCH1	ENSG00000064042.13	chr4	41361624	41702061	+	41362252	41363639	5	Bivalent	none	H3K4me3	No Meth/Exp-	no change
ATP8A1	ENSG00000124406.12	chr4	42410390	42659122	-	42658278	42659550	7	Bivalent	Bivalent	H3K4me3	No Meth/Exp-	no change
KCTD8	ENSG00000183783.6	chr4	44175926	44450824	-	44449386	44451133	12	Bivalent	Bivalent	none	No Meth/Exp-	no change
GABRA2	ENSG00000151834.11	chr4	46250444	46477247	-	46391903	46392572	6	Bivalent	Bivalent	H3K4me3	No Meth/Exp-	no change
RP11-436F23.1	ENSG00000249330.1	chr4	46392272	46435205	+	46391903	46392572	6	Bivalent	Bivalent	H3K4me3	No Meth/Exp-	no change
FRYL	ENSG00000075539.9	chr4	48499378	48782339	-	48781331	48782339	6	H3K4me3	H3K4me3	H3K4me3	No Meth/Exp-	no change
TMEM165	ENSG00000134851.8	chr4	56262124	56319564	+	56261697	56262503	4	H3K4me3	H3K4me3	H3K4me3	No Meth/Exp-	no change
IGFBP7	ENSG00000163453.7	chr4	57896939	57976551	-	57975860	57976916	9	Bivalent	none	none	Meth+/Exp+	Methylable
CXCL1	ENSG00000163739.4	chr4	74735110	74736959	+	74734918	74735544	7	Bivalent	H3K27me3	Bivalent	Meth+/Exp+	Methylable
CXCL3	ENSG00000163734.4	chr4	74902306	74904524	-	74903953	74904589	6	Bivalent	H3K4me3	H3K4me3	Meth+/Exp+	Methylable
CXCL2	ENSG00000081041.8	chr4	74962752	74965010	-	74964656	74965279	9	Bivalent	none	H3K4me3	Meth+/Exp+	Methylable
CDKL2	ENSG00000138769.6	chr4	76503215	76555900	-	76555366	76556079	11	none	H3K4me3	H3K4me3	Meth+/Exp-	Methylated
CCDC158	ENSG00000163749.13	chr4	77234154	77343021	-	77342010	77342707	3	none	none	none	Meth+/Exp-	Methylable
RP11-377G16.2	ENSG00000248719.1	chr4	81104434	81111323	-	81109887	81110460	3	none	none	none	Meth+/Exp-	Methylable
C4orf22	ENSG00000197826.7	chr4	81256874	81884910	+	81257040	81257270	3	Bivalent	none	Bivalent	No Meth/Exp-	no change
AGPAT9	ENSG00000138678.6	chr4	84457067	84527028	+	84457115	84457860	9	Bivalent	Bivalent	none	No Meth/Exp-	no change
SNCA	ENSG00000145335.11	chr4	90645250	90759466	-	90758008	90758870	10	Bivalent	H3K4me3	H3K4me3	No Meth/Exp-	no change
STPG2	ENSG00000163116.5	chr4	98105244	99064391	-	99064602	99064805	2	H3K4me3	H3K4me3	H3K4me3	No Meth/Exp-	no change
RAP1GDS1	ENSG00000138698.10	chr4	99182535	99365012	+	99181509	99183199	8	H3K4me3	H3K4me3	H3K4me3	No Meth/Exp-	no change
TSPAN5	ENSG00000168785.3	chr4	99391518	99579780	-	99579142	99580160	5	Bivalent	none	H3K4me3	No Meth/Exp-	no change
RP11-1299A16.3	ENSG00000260641.1	chr4	99580055	99585701	+	99579142	99580160	5	Bivalent	none	H3K4me3	No Meth/Exp-	no change
TACR3	ENSG00000169836.4	chr4	104507188	104640973	-	104640559	104640797	3	Bivalent	none	none	Meth+/Exp-	Methylable
AC004053.1	ENSG00000245384.1	chr4	105412122	105618749	+	105412655	105412942	3	none	H3K4me3	H3K4me3	No Meth/Exp-	no change
RP11-286E11.1	ENSG00000245293.2	chr4	108784635	108899955	-	108852495	108853387	9	Bivalent	none	H3K4me3	No Meth/Exp-	no change
LEF1	ENSG00000138795.5	chr4	108968701	109090112	-	109087747	109090407	10	Bivalent	none	Bivalent	Meth+/Exp+	Methylable
ENPEP	ENSG00000138792.5	chr4	111286889	111486441	+	111397677	111398089	4	none	none	H3K4me3	No Meth/Exp+	no change
C4orf32	ENSG00000174749.5	chr4	113066553	113116412	+	113066470	113067379	7	Bivalent	Bivalent	H3K4me3	No Meth/Exp-	no change
UGT8	ENSG00000174607.6	chr4	115519611	115599380	+	115519422	115520932	10	Bivalent	Bivalent	Bivalent	No Meth/Exp-	no change
PDE5A	ENSG00000138735.11	chr4	120415550	120550146	-	120548203	120550250	12	none	none	H3K4me3	No Meth/Exp+	no change
CETN4P	ENSG00000224786.1	chr4	123651703	123653348	-	123653585	123654000	6	H3K4me3	H3K4me3	H3K4me3	No Meth/Exp-	no change
RP11-9G1.3	ENSG00000250241.1	chr4	133996466	134070271	-	134069162	134070442	14	Bivalent	none	H3K4me3	No Meth/Exp-	no change
IL15	ENSG00000164136.12	chr4	142557752	142655140	+	142557388	142558323	11	Bivalent	Bivalent	Bivalent	Meth+/Exp+	Methylable
HHIP-AS1	ENSG00000248890.1	chr4	145564074	145582509	-	145566242	145567413	7	Bivalent	H3K4me3	none	Meth+/Exp-	Methylated
HHIP	ENSG00000164161.5	chr4	145567173	145666423	+	145566242	145567413	7	Bivalent	H3K4me3	none	Meth+/Exp-	Methylated
EDNRA	ENSG00000151617.11	chr4	148402069	148466106	+	148402198	148402760	4	Bivalent	none	Bivalent	No Meth/Exp+	no change
FAM160A1	ENSG00000164142.11	chr4	152330368	152584784	+	152329824	152330873	10	Bivalent	Bivalent	H3K4me3	Meth+/Exp-	Methylated
FHDC1	ENSG00000137460.4	chr4	153857504	153900848	+	153857112	153859245	6	Bivalent	Bivalent	H3K4me3	No Meth/Exp+	no change
TRIM2	ENSG00000109654.10	chr4	154073494	154260472	+	154074383	154075045	3	Bivalent	H3K4me3	H3K4me3	No Meth/Exp-	no change
NPY2R	ENSG00000185149.5	chr4	156129781	156138230	+	156129168	156130209	10	Bivalent	none	Bivalent	Meth+/Exp-	Methylable
TMEM144	ENSG00000164124.6	chr4	159122756	159176563	+	159131508	159131736	3	H3K4me3	H3K4me3	H3K4me3	Meth+/Exp-	Methylable
KLHL2	ENSG00000109466.9	chr4	166128770	166244308	+	166128385	166129255	4	Bivalent	H3K4me3	H3K4me3	No Meth/Exp-	no change
SPOCK3	ENSG00000196104.6	chr4	167654535	168155947	-	168155005	168155765	6	Bivalent	Bivalent	none	No Meth/Exp-	no change
NEIL3	ENSG00000109674.3	chr4	178230990	178284097	+	178230850	178231260	10	H3K4me3	H3K4me3	H3K4me3	No Meth/Exp+	no change
STOX2	ENSG00000173320.5	chr4	184774584	184944679	+	184826253	184828177	11	Bivalent	H3K4me3	H3K4me3	No Meth/Exp-	no change
MLF1IP	ENSG00000151725.7	chr4	185615772	185655287	-	185654505	185655515	13	H3K4me3	H3K4me3	H3K4me3	No Meth/Exp+	no change
CCDC110	ENSG00000168491.5	chr4	186366336	186392913	-	186392574	186393184	2	none	none	H3K4me3	No Meth/Exp-	no change
TPPP	ENSG00000171368.10	chr5	660883	693510	-	692681	694377	6	none	H3K4me3	H3K4me3	Meth+/Exp-	Methylated
FAM134B	ENSG00000154153.9	chr5	16473147	16617167	-	16616509	16617428	5	Bivalent	Bivalent	H3K4me3	Meth+/Exp-	Methylable
CTD-2517O10.6	ENSG00000272323.1	chr5	34837654	34839383	-	34838921	34839624	8	H3K4me3	H3K4me3	H3K4me3	Meth+/Exp-	Methylable
TTC23L	ENSG00000205838.8	chr5	34838938	34899561	+	34838921	34839624	8	H3K4me3	H3K4me3	H3K4me3	Meth+/Exp-	Methylable
GDNF-AS1	ENSG00000248587.2	chr5	37840540	37875901	+	37836747	37840726	22	Bivalent	Bivalent	Bivalent	Meth+/Exp+	Methylated
EGFLAM	ENSG00000164318.13	chr5	38258511	38465123	+	38257825	38259136	12	Bivalent	Bivalent	Bivalent	No Meth/Exp+	no change
DAB2	ENSG00000153071.10	chr5	39371780	39462402	-	39424892	39425320	3	none	H3K4me3	H3K4me3	No Meth/Exp+	no change
CCL28	ENSG00000151882.7	chr5	43376747	43412493	-	43396897	43397364	6	none	H3K27me3	H3K4me3	Meth+/Exp-	Methylated
ITGA1	ENSG00000213949.4	chr5	52083730	52255040	+	52083946	52084287	6	none	Bivalent	none	No Meth/Exp+	no change
ITGA2	ENSG00000164171.6	chr5	52285156	52390609	+	52284715	52285489	6	Bivalent	Bivalent	Bivalent	Meth+/Exp-	Methylable
CCNO	ENSG00000152669.8	chr5	54526980	54529508	-	54528814	54530163	10	Bivalent	Bivalent	Bivalent	No Meth/Exp-	no change
FAM159B	ENSG00000145642.7	chr5	63986135	64013917	+	63986189	63986974	4	Bivalent	Bivalent	none	No Meth/Exp+	no change
CENPK	ENSG00000123219.8	chr5	64813593	64858998	-	64858775	64859283	9	H3K4me3	H3K4me3	H3K4me3	No Meth/Exp+	no change
IQGAP2	ENSG00000145703.11	chr5	75699074	76003957	+	75698759	75700160	4	H3K4me3	H3K4me3	none	No Meth/Exp+	no change
F2R	ENSG00000181104.6	chr5	76011868	76031606	+	76011120	76012292	10	Bivalent	H3K4me3	none	Meth+/Exp+	Methylable
CRHBP	ENSG00000145708.6	chr5	76248538	76276983	+	76249435	76250528	6	Bivalent	none	Bivalent	Meth+/Exp-	Methylable
CTC-459I6.1	ENSG00000251450.1	chr5	80243516	80256726	-	80255904	80257006	8	Bivalent	none	none	Meth+/Exp-	Methylable
RASGRF2	ENSG00000113319.7	chr5	80256491	80525975	+	80255904	80257006	8	Bivalent	none	none	Meth+/Exp-	Methylable
EDIL3	ENSG00000164176.8	chr5	83236373	83680611	-	83679584	83680720	8	Bivalent	Bivalent	H3K4me3	No Meth/Exp-	no change
CTD-2269F5.1	ENSG00000250320.1	chr5	83680245	83786583	+	83679584	83680720	8	Bivalent	Bivalent	H3K4me3	No Meth/Exp-	no change
C5orf30	ENSG00000181751.5	chr5	102594403	102614361	+	102594435	102595550	5	H3K4me3	H3K4me3	H3K4me3	No Meth/Exp-	no change
CTC-332L22.1	ENSG00000271849.1	chr5	109023503	109024030	-	109024965	109026701	9	H3K4me3	H3K4me3	H3K4me3	No Meth/Exp-	no change
MAN2A1	ENSG00000112893.5	chr5	109025067	109205326	+	109024965	109026701	9	H3K4me3	H3K4me3	H3K4me3	No Meth/Exp-	no change
LOX	ENSG00000113083.8	chr5	121398890	121413980	-	121412500	121414077	10	Bivalent	Bivalent	none	No Meth/Exp+	no change
LMNB1	ENSG00000113368.7	chr5	126112315	126172712	+	126112229	126114229	11	H3K4me3	H3K4me3	H3K4me3	No Meth/Exp+	no change
MEGF10	ENSG00000145794.12	chr5	126626523	126801429	+	126626053	126626901	9	none	H3K4me3	none	Meth+/Exp-	Methylated
SLC12A2	ENSG00000064651.9	chr5	127419458	127525380	+	127418594	127420512	12	Bivalent	H3K4me3	H3K4me3	No Meth/Exp-	no change
IRF1	ENSG00000125347.9	chr5	131817301	131826490	-	131825842	131826935	7	Bivalent	none	H3K4me3	No Meth/Exp+	no change
AC004041.2	ENSG00000223442.1	chr5	131966281	131999964	-	131991554	131992304	4	none	none	H3K4me3	Meth+/Exp-	Methylable
CCNI2	ENSG00000205089.3	chr5	132083137	132089856	+	132082873	132083911	5	Bivalent	none	H3K4me3	Meth+/Exp-	Methylated
SOWAHA	ENSG00000198944.4	chr5	132149033	132152488	+	132148854	132150918	11	Bivalent	H3K27me3	H3K4me3	Meth+/Exp-	Methylated
CTC-349C3.1	ENSG00000224186.4	chr5	134368970	134691744	+	134368578	134370466	13	Bivalent	H3K27me3	H3K27me3	Meth+/Exp+	Methylated
TGFBI	ENSG00000120708.12	chr5	135364584	135399507	+	135364507	135365036	9	Bivalent	H3K27me3	H3K27me3	Meth+/Exp+	Methylable
RP11-381K20.2	ENSG00000250159.2	chr5	137150022	137225025	-	137224986	137225477	4	none	none	H3K4me3	Meth+/Exp-	Methylable
KIF20A	ENSG00000112984.7	chr5	137514408	137523404	+	137514660	137514941	3	H3K4me3	H3K4me3	H3K4me3	No Meth/Exp+	no change
EIF4EBP3	ENSG00000243056.1	chr5	139927251	139929163	+	139927157	139927491	9	H3K4me3	none	H3K4me3	No Meth/Exp+	no change
CD14	ENSG00000170458.9	chr5	140011313	140013286	-	140011482	140012739	4	none	none	H3K4me3	Meth+/Exp+	Methylated
PCDHAC2	ENSG00000243232.3	chr5	140345820	140391936	+	140346105	140346931	10	Bivalent	H3K4me3	H3K4me3	No Meth/Exp-	no change
SLC25A2	ENSG00000120329.4	chr5	140682196	140683612	-	140683195	140683773	10	none	none	none	Meth+/Exp+	Methylated
PCDH12	ENSG00000113555.4	chr5	141323150	141349304	-	141348531	141349104	8	H3K4me3	H3K4me3	H3K4me3	No Meth/Exp+	no change
CTC-255N20.1	ENSG00000250343.1	chr5	146559767	146614422	-	146614283	146614560	8	Bivalent	Bivalent	none	No Meth/Exp+	no change
AFAP1L1	ENSG00000157510.9	chr5	148651434	148721365	+	148650920	148651772	5	Bivalent	Bivalent	H3K4me3	Meth+/Exp+	Methylable
ARSI	ENSG00000183876.8	chr5	149675906	149718870	-	149681702	149682601	4	none	none	none	Meth+/Exp-	Methylable
FAXDC2	ENSG00000170271.6	chr5	154198051	154238812	-	154237008	154238362	8	H3K4me3	H3K4me3	H3K4me3	No Meth/Exp-	no change
NIPAL4	ENSG00000172548.10	chr5	156887027	156901725	+	156886969	156887440	5	Bivalent	none	none	Meth+/Exp-	Methylated
RP11-175K6.1	ENSG00000245812.2	chr5	158527491	158544486	+	158527374	158527983	6	Bivalent	H3K4me3	Bivalent	No Meth/Exp+	no change
CTB-11I22.1	ENSG00000253256.1	chr5	158636929	158675804	+	158636218	158636949	5	none	H3K4me3	H3K4me3	No Meth/Exp+	no change
AC008697.1	ENSG00000249738.2	chr5	158737941	158789842	+	158758474	158758839	4	none	none	none	Meth+/Exp-	Methylable
PTTG1	ENSG00000164611.8	chr5	159848829	159855748	+	159848779	159849113	4	H3K4me3	H3K4me3	H3K4me3	No Meth/Exp+	no change
STC2	ENSG00000113739.6	chr5	172741716	172756506	-	172754056	172757098	16	Bivalent	Bivalent	Bivalent	Meth+/Exp+	Methylated
HK3	ENSG00000160883.6	chr5	176307870	176326333	-	176314451	176314662	3	none	H3K27me3	none	No Meth/Exp+	no change
IRF4	ENSG00000137265.10	chr6	391739	411447	+	391188	393790	14	Bivalent	Bivalent	Bivalent	Meth+/Exp+	Methylable
FOXC1	ENSG00000054598.5	chr6	1610681	1614127	+	1604606	1615866	34	Bivalent	Bivalent	Bivalent	Meth+/Exp+	Methylated
FAM50B	ENSG00000145945.5	chr6	3849620	3851551	+	3849271	3851048	25	none	none	H3K4me3	Meth+/Exp-	Methylated
STMND1	ENSG00000230873.4	chr6	17102489	17131603	+	17102309	17102539	3	Bivalent	none	H3K4me3	Meth+/Exp-	Methylated
NHLRC1	ENSG00000187566.3	chr6	18120718	18122851	-	18122250	18122994	6	Bivalent	none	H3K4me3	Meth+/Exp-	Methylated
RP4-625H18.2	ENSG00000228412.2	chr6	19802395	19804983	-	19804854	19805371	3	none	H3K4me3	H3K4me3	No Meth/Exp+	no change
MBOAT1	ENSG00000172197.9	chr6	20100935	20212670	-	20212268	20213133	3	Bivalent	H3K4me3	H3K4me3	No Meth/Exp-	no change
SOX4	ENSG00000124766.4	chr6	21593972	21598847	+	21594613	21596437	3	H3K4me3	H3K4me3	H3K4me3	No Meth/Exp+	no change
KIAA0319	ENSG00000137261.9	chr6	24544332	24646383	-	24645931	24646591	9	none	none	H3K4me3	No Meth/Exp-	no change
HIST1H3B	ENSG00000124693.2	chr6	26031817	26032288	-	26031880	26032264	4	H3K4me3	H3K4me3	none	No Meth/Exp+	no change
HIST1H2AB	ENSG00000137259.2	chr6	26033320	26033796	-	26033474	26033787	5	H3K4me3	H3K4me3	none	No Meth/Exp+	no change
HIST1H2BB	ENSG00000196226.2	chr6	26043455	26043885	-	26044203	26044469	6	H3K4me3	H3K4me3	H3K4me3	No Meth/Exp+	no change
HIST1H3C	ENSG00000196532.4	chr6	26045639	26046097	+	26045644	26046033	3	H3K4me3	H3K4me3	H3K4me3	No Meth/Exp+	no change
HIST1H3F	ENSG00000256316.1	chr6	26250370	26250835	-	26250436	26250827	4	H3K4me3	H3K4me3	Bivalent	Meth+/Exp+	Methylable
HIST1H2BH	ENSG00000197459.2	chr6	26251879	26252303	+	26251898	26252233	3	H3K4me3	H3K4me3	Bivalent	Meth+/Exp+	Methylable
HCG11	ENSG00000228223.1	chr6	26522076	26526807	+	26521947	26522579	4	H3K4me3	H3K4me3	H3K4me3	Meth+/Exp-	Methylated
HIST1H2AG	ENSG00000196787.2	chr6	27100832	27103070	+	27100174	27101124	12	H3K4me3	H3K4me3	Bivalent	No Meth/Exp+	no change
HIST1H2BL	ENSG00000185130.4	chr6	27775257	27775709	-	27775329	27776258	10	H3K4me3	H3K4me3	Bivalent	No Meth/Exp+	no change
HIST1H2AI	ENSG00000196747.3	chr6	27775899	27776429	+	27775329	27776258	10	H3K4me3	H3K4me3	Bivalent	No Meth/Exp+	no change
HIST1H3H	ENSG00000203813.4	chr6	27777842	27778314	+	27777855	27778251	3	H3K4me3	H3K4me3	Bivalent	No Meth/Exp+	no change
HIST1H2AK	ENSG00000184348.2	chr6	27805658	27806117	-	27805843	27806853	14	H3K4me3	H3K4me3	Bivalent	No Meth/Exp+	no change
HIST1H2AL	ENSG00000198374.3	chr6	27833034	27833606	+	27833120	27833406	4	H3K4me3	H3K4me3	Bivalent	No Meth/Exp+	no change
HIST1H1B	ENSG00000184357.3	chr6	27834570	27835359	-	27835190	27835461	7	H3K4me3	H3K4me3	Bivalent	No Meth/Exp+	no change
HIST1H4L	ENSG00000198558.2	chr6	27840926	27841289	-	27841001	27841244	4	H3K4me3	H3K4me3	Bivalent	Meth+/Exp+	Methylated
NKAPL	ENSG00000189134.3	chr6	28227098	28228736	+	28226979	28227483	9	none	H3K27me3	none	Meth+/Exp-	Methylated
CLIC1	ENSG00000213719.4	chr6	31698358	31707540	-	31707489	31708336	30	H3K4me3	H3K4me3	H3K4me3	No Meth/Exp+	no change
MSH5	ENSG00000204410.10	chr6	31707725	31732622	+	31707489	31708336	30	H3K4me3	H3K4me3	H3K4me3	No Meth/Exp+	no change
HSPA1A	ENSG00000204389.8	chr6	31783291	31785723	+	31782872	31785190	24	H3K4me3	none	H3K4me3	Meth+/Exp-	Methylable
HSPA1B	ENSG00000204388.5	chr6	31795512	31798031	+	31795467	31797384	5	H3K4me3	H3K4me3	H3K4me3	No Meth/Exp-	no change
PSMB8	ENSG00000204264.4	chr6	32808494	32812480	-	32811494	32811839	10	Bivalent	Bivalent	H3K4me3	No Meth/Exp+	no change
KIFC1	ENSG00000237649.3	chr6	33359313	33377701	+	33359097	33359975	24	H3K4me3	H3K4me3	H3K4me3	No Meth/Exp+	no change
CDKN1A	ENSG00000124762.9	chr6	36644305	36655116	+	36646244	36648465	14	Bivalent	H3K4me3	H3K4me3	No Meth/Exp+	no change
RSPH9	ENSG00000172426.11	chr6	43612783	43640336	+	43612714	43613366	5	H3K4me3	none	H3K4me3	Meth+/Exp-	Methylated
RP1-244F24.1	ENSG00000271857.1	chr6	45388816	45389742	-	45389420	45391646	12	Bivalent	H3K4me3	none	Meth+/Exp-	Methylated
RCAN2	ENSG00000172348.10	chr6	46188475	46459709	-	46458878	46459257	5	none	none	H3K4me3	No Meth/Exp-	no change
RP11-795J1.1	ENSG00000236466.1	chr6	46459789	46500495	+	46458878	46459257	5	none	none	H3K4me3	No Meth/Exp-	no change
PAQR8	ENSG00000170915.8	chr6	52226219	52272575	+	52226753	52228006	5	Bivalent	H3K4me3	H3K4me3	Meth+/Exp-	Methylable
TTK	ENSG00000112742.5	chr6	80713604	80752244	+	80714149	80714568	9	H3K4me3	H3K4me3	H3K4me3	No Meth/Exp+	no change
ME1	ENSG00000065833.7	chr6	83920108	84140797	-	84140412	84140998	7	none	none	H3K4me3	Meth+/Exp-	Methylated
KLHL32	ENSG00000186231.12	chr6	97372605	97588630	+	97372181	97372661	4	none	none	H3K4me3	No Meth/Exp-	no change
BVES	ENSG00000112276.9	chr6	105544697	105585049	-	105584148	105585621	8	Bivalent	none	none	Meth+/Exp-	Methylable
BVES-AS1	ENSG00000203808.6	chr6	105584183	105617820	+	105584148	105585621	8	Bivalent	none	none	Meth+/Exp-	Methylable
POPDC3	ENSG00000132429.5	chr6	105606155	105627870	-	105627406	105627830	2	none	none	H3K4me3	No Meth/Exp-	no change
PRDM1	ENSG00000057657.10	chr6	106534195	106557814	+	106534136	106534385	4	Bivalent	Bivalent	Bivalent	No Meth/Exp+	no change
CDK19	ENSG00000155111.10	chr6	110931181	111137161	-	111135515	111136913	9	H3K4me3	H3K4me3	H3K4me3	No Meth/Exp-	no change
LAMA4	ENSG00000112769.14	chr6	112429963	112576141	-	112575091	112575483	5	Bivalent	Bivalent	H3K4me3	No Meth/Exp+	no change
HS3ST5	ENSG00000249853.3	chr6	114376750	114664209	-	114663328	114664859	6	none	Bivalent	H3K4me3	No Meth/Exp-	no change
NT5DC1	ENSG00000178425.9	chr6	116422012	116570660	+	116421673	116422382	11	H3K4me3	none	H3K4me3	No Meth/Exp-	no change
NKAIN2	ENSG00000188580.9	chr6	124125286	125146803	+	124124177	124125309	7	Bivalent	H3K4me3	H3K4me3	No Meth/Exp-	no change
NCOA7	ENSG00000111912.14	chr6	126102307	126252266	+	126111537	126112480	3	none	H3K4me3	H3K4me3	No Meth/Exp-	no change
PTPRK	ENSG00000152894.10	chr6	128289924	128841870	-	128840158	128842126	13	H3K4me3	H3K4me3	H3K4me3	No Meth/Exp-	no change
TMEM200A	ENSG00000164484.7	chr6	130686879	130764208	+	130686414	130687736	7	Bivalent	Bivalent	none	No Meth/Exp-	no change
MAP7	ENSG00000135525.14	chr6	136663875	136871957	-	136870826	136872145	11	none	Bivalent	H3K4me3	Meth+/Exp-	Methylable
IL20RA	ENSG00000016402.8	chr6	137321108	137366298	-	137365299	137366126	4	Bivalent	Bivalent	none	Meth+/Exp-	Methylated
TNFAIP3	ENSG00000118503.10	chr6	138188351	138204449	+	138187825	138189141	12	Bivalent	Bivalent	none	No Meth/Exp+	no change
STX11	ENSG00000135604.9	chr6	144471663	144509507	+	144471069	144472017	7	Bivalent	Bivalent	H3K4me3	No Meth/Exp+	no change
UST	ENSG00000111962.7	chr6	149068464	149398126	+	149068179	149069775	10	H3K4me3	none	H3K4me3	No Meth/Exp+	no change
SYNJ2	ENSG00000078269.9	chr6	158402888	158520208	+	158402072	158403444	8	none	none	H3K4me3	Meth+/Exp-	Methylated
PNLDC1	ENSG00000146453.8	chr6	160221298	160241736	+	160221146	160221493	6	none	none	none	No Meth/Exp-	no change
PRR18	ENSG00000176381.4	chr6	166719168	166721936	-	166720239	166722275	12	Bivalent	Bivalent	none	Meth+/Exp-	Methylated
PDGFA	ENSG00000197461.9	chr7	536895	559933	-	556611	562845	18	Bivalent	Bivalent	H3K4me3	Meth+/Exp-	Methylated
AC073957.15	ENSG00000225146.1	chr7	1068661	1083527	+	1066931	1068245	7	none	H3K4me3	H3K4me3	No Meth/Exp+	no change
GPER1	ENSG00000164850.10	chr7	1121844	1133451	+	1126578	1126910	3	H3K4me3	none	H3K4me3	Meth+/Exp+	Methylated
ZNF890P	ENSG00000159904.7	chr7	5160870	5184177	-	5183878	5184223	3	none	none	H3K4me3	No Meth/Exp-	no change
AC003075.4	ENSG00000237773.1	chr7	17319458	17338981	-	17338252	17339101	6	Bivalent	H3K4me3	H3K4me3	No Meth/Exp-	no change
RAPGEF5	ENSG00000136237.14	chr7	22157856	22396763	-	22396039	22396852	5	Bivalent	none	none	No Meth/Exp-	no change
STEAP1B	ENSG00000105889.10	chr7	22459063	22672544	-	22539545	22540022	7	none	none	none	Meth+/Exp-	Methylated
GPNMB	ENSG00000136235.11	chr7	23275586	23314727	+	23287221	23287508	3	none	H3K27me3	Bivalent	Meth+/Exp+	Methylated
NFE2L3	ENSG00000050344.8	chr7	26191860	26226745	+	26191794	26192757	4	Bivalent	Bivalent	Bivalent	Meth+/Exp-	Methylated
AC004540.4	ENSG00000225792.1	chr7	26411764	26416321	-	26415746	26416891	5	Bivalent	none	Bivalent	No Meth/Exp+	no change
HOXA5	ENSG00000106004.4	chr7	27180671	27183287	-	27182613	27185562	52	Bivalent	H3K4me3	none	Meth+/Exp+	Methylated
CREB5	ENSG00000146592.12	chr7	28338940	28865511	+	28448716	28450028	5	Bivalent	none	none	No Meth/Exp-	no change
CPVL	ENSG00000106066.9	chr7	29034847	29235067	-	29233704	29235046	8	Bivalent	Bivalent	none	No Meth/Exp+	no change
CHN2	ENSG00000106069.16	chr7	29161890	29553944	+	29233704	29235046	8	Bivalent	Bivalent	none	No Meth/Exp-	no change
C7orf41	ENSG00000180354.11	chr7	30174426	30202378	+	30174230	30176169	8	Bivalent	none	H3K4me3	No Meth/Exp-	no change
2007-09-01	ENSG00000122545.13	chr7	35840542	35944917	+	35840132	35841591	10	H3K4me3	H3K4me3	H3K4me3	No Meth/Exp-	no change
ANLN	ENSG00000011426.6	chr7	36429415	36493400	+	36429250	36429806	7	H3K4me3	H3K4me3	H3K4me3	No Meth/Exp-	no change
IGFBP1	ENSG00000146678.5	chr7	45927956	45933267	+	45928002	45928585	4	Bivalent	none	none	No Meth/Exp+	no change
COBL	ENSG00000106078.13	chr7	51083909	51384515	-	51383311	51384938	11	Bivalent	Bivalent	H3K4me3	Meth+/Exp-	Methylated
EGFR	ENSG00000146648.11	chr7	55086714	55324313	+	55086141	55088105	7	Bivalent	none	Bivalent	No Meth/Exp+	no change
RP13-492C18.2	ENSG00000237268.2	chr7	56489550	56516068	-	56515585	56515864	3	none	none	none	No Meth/Exp+	no change
YWHAG	ENSG00000170027.5	chr7	75956116	75988348	-	75987606	75988977	14	H3K4me3	H3K4me3	H3K4me3	No Meth/Exp-	no change
GNAI1	ENSG00000127955.11	chr7	79763271	79848718	+	79763793	79764889	7	none	none	H3K4me3	No Meth/Exp-	no change
SEMA3C	ENSG00000075223.9	chr7	80371854	80551675	-	80548306	80548726	4	none	H3K4me3	H3K4me3	No Meth/Exp-	no change
CACNA2D1	ENSG00000153956.11	chr7	81575760	82073114	-	82072021	82073520	8	none	Bivalent	H3K4me3	No Meth/Exp-	no change
KIAA1324L	ENSG00000164659.10	chr7	86506222	86689015	-	86688832	86689238	5	none	none	H3K4me3	No Meth/Exp-	no change
ABCB4	ENSG00000005471.11	chr7	87031013	87109751	-	87104723	87105305	6	Bivalent	H3K4me3	none	Meth+/Exp+	Methylable
AC002456.2	ENSG00000223969.1	chr7	90219933	90226667	-	90225082	90226364	7	none	H3K4me3	H3K4me3	No Meth/Exp+	no change
DYNC1I1	ENSG00000158560.10	chr7	95401866	95739634	+	95401691	95402432	6	Bivalent	Bivalent	H3K4me3	No Meth/Exp-	no change
RP11-758P17.3	ENSG00000240211.1	chr7	100033827	100036127	+	100033262	100034253	7	H3K4me3	H3K4me3	H3K4me3	No Meth/Exp+	no change
PCOLCE	ENSG00000106333.8	chr7	100199800	100205798	+	100201614	100203652	8	Bivalent	H3K4me3	H3K4me3	Meth+/Exp+	Methylated
NAT16	ENSG00000167011.4	chr7	100813774	100823557	-	100823307	100823701	3	Bivalent	Bivalent	H3K27me3	No Meth/Exp+	no change
LHFPL3	ENSG00000187416.7	chr7	103969104	104549001	+	103968783	103969959	6	Bivalent	Bivalent	none	No Meth/Exp+	no change
MET	ENSG00000105976.10	chr7	116312444	116438440	+	116311824	116312598	6	Bivalent	Bivalent	none	No Meth/Exp-	no change
TSPAN12	ENSG00000106025.4	chr7	120427376	120498456	-	120497120	120498220	4	H3K4me3	H3K4me3	H3K4me3	No Meth/Exp+	no change
PTPRZ1	ENSG00000106278.7	chr7	121513143	121702090	+	121513046	121513911	6	none	H3K4me3	Bivalent	No Meth/Exp+	no change
GPR37	ENSG00000170775.2	chr7	124386051	124405681	-	124404700	124406189	10	Bivalent	Bivalent	none	Meth+/Exp-	Methylable
SVOPL	ENSG00000157703.11	chr7	138279030	138386097	-	138348962	138349444	3	H3K4me3	H3K4me3	H3K4me3	No Meth/Exp-	no change
KLRG2	ENSG00000188883.4	chr7	139137436	139168458	-	139167480	139168712	10	Bivalent	Bivalent	none	Meth+/Exp-	Methylable
AC073342.12	ENSG00000231840.1	chr7	142952357	142984473	-	142985047	142985810	4	H3K4me3	H3K4me3	H3K4me3	No Meth/Exp-	no change
FAM131B	ENSG00000159784.13	chr7	143050493	143059863	-	143058917	143060156	12	none	none	H3K4me3	No Meth/Exp-	no change
FAM115C	ENSG00000170379.15	chr7	143318043	143427502	+	143317293	143318004	2	none	none	none	No Meth/Exp+	no change
EZH2	ENSG00000106462.6	chr7	148504475	148581413	-	148580495	148582061	6	H3K4me3	H3K4me3	H3K4me3	No Meth/Exp+	no change
AC144652.1	ENSG00000273117.1	chr7	155087628	155089251	-	155088705	155090212	8	H3K4me3	H3K4me3	H3K4me3	Meth+/Exp-	Methylated
AC008060.7	ENSG00000218672.1	chr7	155174771	155189051	+	155174128	155175248	7	none	Bivalent	Bivalent	Meth+/Exp-	Methylated
RP11-378A12.1	ENSG00000249694.2	chr8	2447076	2480453	-	2480425	2480920	3	none	none	none	Meth+/Exp-	Methylable
GS1-24F4.2	ENSG00000245857.2	chr8	6693076	6742798	+	6691833	6693135	9	none	Bivalent	none	No Meth/Exp+	no change
RP11-481A20.11	ENSG00000255098.1	chr8	11870545	11873043	-	11872118	11872779	2	none	none	none	No Meth/Exp+	no change
FAM86B1	ENSG00000186523.10	chr8	12039605	12051642	-	12051096	12052607	4	none	none	H3K4me3	No Meth/Exp-	no change
MTUS1	ENSG00000129422.9	chr8	17501304	17658426	-	17658166	17659321	8	Bivalent	Bivalent	Bivalent	No Meth/Exp-	no change
LPL	ENSG00000175445.10	chr8	19759228	19824769	+	19796843	19798006	5	Bivalent	H3K4me3	none	No Meth/Exp+	no change
DOK2	ENSG00000147443.8	chr8	21766384	21771371	-	21769694	21770080	2	none	none	none	No Meth/Exp+	no change
LGI3	ENSG00000168481.4	chr8	22004338	22014597	-	22014152	22014559	5	Bivalent	none	none	No Meth/Exp-	no change
SFTPC	ENSG00000168484.8	chr8	22014426	22021992	+	22014152	22014559	5	Bivalent	none	none	No Meth/Exp-	no change
RP11-875O11.1	ENSG00000245025.2	chr8	22842109	22876848	-	22864324	22864588	2	none	none	none	No Meth/Exp+	no change
TNFRSF10B	ENSG00000120889.8	chr8	22877646	22926692	-	22925655	22926912	13	none	H3K4me3	Bivalent	No Meth/Exp+	no change
TNFRSF10C	ENSG00000173535.9	chr8	22941868	22974950	+	22960384	22960927	7	Bivalent	none	none	Meth+/Exp+	Methylated
TNFRSF10D	ENSG00000173530.5	chr8	22993101	23021543	-	23021056	23021588	5	none	Bivalent	none	Meth+/Exp+	Methylated
LOXL2	ENSG00000134013.11	chr8	23154702	23282841	-	23260442	23261867	9	Bivalent	H3K4me3	none	No Meth/Exp+	no change
DOCK5	ENSG00000147459.13	chr8	25042238	25275598	+	25041795	25042820	4	none	H3K4me3	H3K4me3	No Meth/Exp-	no change
CDCA2	ENSG00000184661.9	chr8	25316513	25365436	+	25315286	25317028	13	H3K4me3	H3K4me3	H3K4me3	No Meth/Exp+	no change
PBK	ENSG00000168078.5	chr8	27667137	27695612	-	27695095	27695479	2	H3K4me3	H3K4me3	H3K4me3	No Meth/Exp+	no change
KIF13B	ENSG00000197892.8	chr8	28924796	29120641	-	29119957	29120787	8	none	H3K4me3	H3K4me3	No Meth/Exp-	no change
EIF4EBP1	ENSG00000187840.4	chr8	37887859	37917883	+	37887692	37888830	11	H3K4me3	none	H3K4me3	No Meth/Exp+	no change
GOLGA7	ENSG00000147533.12	chr8	41347915	41368499	+	41347794	41348581	6	H3K4me3	H3K4me3	H3K4me3	No Meth/Exp-	no change
EFCAB1	ENSG00000034239.6	chr8	49623348	49647870	-	49647702	49647988	5	Bivalent	none	none	Meth+/Exp-	Methylable
PLAG1	ENSG00000181690.3	chr8	57073463	57123883	-	57123572	57124997	4	H3K4me3	H3K4me3	H3K4me3	No Meth/Exp-	no change
FAM110B	ENSG00000169122.7	chr8	58907068	59116838	+	58907001	58907822	6	H3K4me3	none	H3K4me3	No Meth/Exp+	no change
CYP7B1	ENSG00000172817.3	chr8	65500320	65711318	-	65710990	65711722	10	Bivalent	none	H3K4me3	Meth+/Exp-	Methylated
RP11-159H10.3	ENSG00000246528.3	chr8	70746346	70767206	+	70744098	70747441	21	Bivalent	Bivalent	none	Meth+/Exp+	Methylated
RDH10	ENSG00000121039.5	chr8	74206847	74237516	+	74206223	74208179	8	Bivalent	none	none	No Meth/Exp+	no change
RP11-363E6.3	ENSG00000254027.1	chr8	82192106	82193681	-	82192378	82193685	13	H3K4me3	Bivalent	H3K4me3	Meth+/Exp-	Methylated
RP11-257P3.3	ENSG00000253374.1	chr8	82433853	82445510	+	82434436	82434665	4	none	none	none	No Meth/Exp+	no change
NECAB1	ENSG00000123119.7	chr8	91803778	91971636	+	91803656	91804141	6	Bivalent	none	none	Meth+/Exp-	Methylated
CCNE2	ENSG00000175305.12	chr8	95891998	95908906	-	95906788	95909088	9	H3K4me3	H3K4me3	H3K4me3	No Meth/Exp-	no change
CPQ	ENSG00000104324.11	chr8	97657455	98161882	+	97657174	97657943	11	Bivalent	none	H3K4me3	Meth+/Exp-	Methylated
TSPYL5	ENSG00000180543.3	chr8	98285717	98290176	-	98289604	98290404	6	none	none	H3K4me3	Meth+/Exp-	Methylated
MATN2	ENSG00000132561.9	chr8	98881068	99048944	+	98881311	98881843	3	Bivalent	none	H3K4me3	No Meth/Exp+	no change
NCALD	ENSG00000104490.13	chr8	102698771	103137135	-	103135914	103136775	4	Bivalent	H3K4me3	H3K4me3	No Meth/Exp-	no change
KB-1732A1.1	ENSG00000253669.3	chr8	103817745	103822199	+	103818620	103819495	4	none	none	H3K4me3	No Meth/Exp+	no change
C8orf56	ENSG00000236939.2	chr8	104145191	104153703	-	104152726	104153390	4	Bivalent	H3K4me3	H3K4me3	No Meth/Exp+	no change
TMEM74	ENSG00000164841.4	chr8	109619079	109799844	-	109799429	109799847	4	none	Bivalent	H3K4me3	No Meth/Exp-	no change
SAMD12	ENSG00000177570.9	chr8	119201698	119634234	-	119633926	119634313	5	Bivalent	Bivalent	H3K4me3	No Meth/Exp-	no change
DEPTOR	ENSG00000155792.5	chr8	120885957	121063152	+	120885814	120886610	8	H3K4me3	none	H3K4me3	No Meth/Exp-	no change
RP11-89K10.1	ENSG00000254286.1	chr8	127570120	127725660	+	127568676	127570873	13	H3K4me3	Bivalent	H3K4me3	No Meth/Exp+	no change
CASC11	ENSG00000249375.3	chr8	128698588	128746213	-	128746250	128746480	3	H3K4me3	none	none	No Meth/Exp+	no change
MYC	ENSG00000136997.10	chr8	128747680	128753674	+	128747805	128751279	26	none	none	none	No Meth/Exp+	no change
RP11-473O4.3	ENSG00000253720.1	chr8	130952102	130961640	+	130951372	130952651	9	H3K4me3	H3K4me3	H3K4me3	No Meth/Exp-	no change
NDRG1	ENSG00000104419.10	chr8	134249414	134314265	-	134308328	134310145	7	Bivalent	Bivalent	H3K4me3	No Meth/Exp-	no change
LYNX1	ENSG00000180155.14	chr8	143845752	143859640	-	143858279	143859411	14	none	none	H3K4me3	Meth+/Exp-	Methylable
OPLAH	ENSG00000178814.11	chr8	145106167	145118735	-	145114550	145115828	4	none	H3K27me3	none	Meth+/Exp-	Methylated
AF186192.5	ENSG00000255085.4	chr8	145925738	145933902	+	145925410	145926101	6	none	none	Bivalent	Meth+/Exp-	Methylable
VLDLR	ENSG00000147852.11	chr9	2621834	2660053	+	2621308	2623685	6	Bivalent	Bivalent	H3K4me3	Meth+/Exp-	Methylated
RP11-390F4.6	ENSG00000236924.1	chr9	6645956	6670635	+	6645080	6645975	2	Bivalent	H3K4me3	none	No Meth/Exp+	no change
RP11-75C9.1	ENSG00000225706.1	chr9	8858130	8862255	+	8857485	8858708	6	Bivalent	H3K4me3	H3K4me3	No Meth/Exp-	no change
RP11-120J1.1	ENSG00000225472.1	chr9	14317084	14357907	+	14346265	14348149	3	Bivalent	Bivalent	none	No Meth/Exp+	no change
RP11-354P17.15	ENSG00000261696.1	chr9	21394887	21396345	-	21396071	21396364	3	none	Bivalent	H3K4me3	No Meth/Exp-	no change
RP11-195F19.5	ENSG00000187186.10	chr9	34664160	34666109	-	34664930	34665687	2	H3K4me3	none	H3K4me3	Meth+/Exp-	Methylable
RP11-195F19.9	ENSG00000230074.1	chr9	34665662	34681295	+	34664930	34665687	2	H3K4me3	none	H3K4me3	Meth+/Exp-	Methylable
CA9	ENSG00000107159.8	chr9	35673853	35681156	+	35675648	35676375	3	none	H3K27me3	H3K4me3	Meth+/Exp+	Methylated
MELK	ENSG00000165304.3	chr9	36572859	36677678	+	36572703	36573073	3	H3K4me3	H3K4me3	H3K4me3	No Meth/Exp+	no change
PIP5K1B	ENSG00000107242.13	chr9	71320575	71624092	+	71319698	71320937	4	Bivalent	H3K4me3	H3K4me3	No Meth/Exp-	no change
ABHD17B	ENSG00000107362.9	chr9	74477368	74525847	-	74525249	74526679	4	H3K4me3	H3K4me3	H3K4me3	No Meth/Exp-	no change
TLE4	ENSG00000106829.14	chr9	82186688	82341658	+	82185479	82188560	11	H3K4me3	H3K4me3	H3K4me3	Meth+/Exp-	Methylated
RP11-154D17.1	ENSG00000233926.1	chr9	84304628	84391815	+	84302139	84305001	6	H3K4me3	none	H3K4me3	Meth+/Exp-	Methylated
C9orf64	ENSG00000165118.10	chr9	86553226	86571901	-	86571047	86572027	6	none	Bivalent	H3K4me3	Meth+/Exp-	Methylated
AGTPBP1	ENSG00000135049.11	chr9	88161455	88356944	-	88356140	88357365	2	H3K4me3	H3K4me3	H3K4me3	No Meth/Exp-	no change
C9orf170	ENSG00000204446.2	chr9	89763559	89774471	+	89763336	89763767	3	Bivalent	none	H3K4me3	No Meth/Exp-	no change
CKS2	ENSG00000123975.4	chr9	91926113	91931618	+	91925372	91926639	7	H3K4me3	H3K4me3	H3K4me3	No Meth/Exp+	no change
RP11-535M15.1	ENSG00000224848.1	chr9	99449338	99483403	+	99449110	99449578	2	H3K4me3	none	H3K4me3	Meth+/Exp-	Methylated
CTSV	ENSG00000136943.6	chr9	99794940	99801925	-	99800856	99801724	5	Bivalent	none	none	No Meth/Exp-	no change
COL15A1	ENSG00000204291.6	chr9	101705461	101833069	+	101705907	101706682	4	Bivalent	none	Bivalent	No Meth/Exp+	no change
NIPSNAP3B	ENSG00000165028.7	chr9	107526438	107539738	+	107526172	107526779	5	Bivalent	H3K4me3	H3K4me3	Meth+/Exp-	Methylated
ABCA1	ENSG00000165029.11	chr9	107543283	107690518	-	107689847	107690798	5	Bivalent	H3K4me3	H3K4me3	No Meth/Exp+	no change
LPAR1	ENSG00000198121.9	chr9	113635543	113800981	-	113799913	113801375	5	Bivalent	none	H3K4me3	Meth+/Exp-	Methylable
SLC31A2	ENSG00000136867.6	chr9	115913222	115926417	+	115913081	115913807	3	none	none	H3K4me3	No Meth/Exp-	no change
DFNB31	ENSG00000095397.9	chr9	117164360	117267730	-	117266468	117268094	8	Bivalent	none	none	Meth+/Exp-	Methylated
PAPPA	ENSG00000182752.8	chr9	118916083	119164601	+	118916362	118917175	3	Bivalent	H3K4me3	Bivalent	No Meth/Exp+	no change
TTLL11	ENSG00000175764.10	chr9	124584207	124855885	-	124854824	124855819	3	Bivalent	none	H3K4me3	No Meth/Exp-	no change
RP11-85O21.2	ENSG00000236668.2	chr9	126768556	126771675	-	126770663	126772091	3	Bivalent	Bivalent	Bivalent	Meth+/Exp-	Methylated
OLFML2A	ENSG00000185585.15	chr9	127539437	127577164	+	127539239	127540081	4	Bivalent	Bivalent	none	Meth+/Exp+	Methylated
CERCAM	ENSG00000167123.14	chr9	131174030	131199626	+	131182468	131183335	3	Bivalent	H3K4me3	H3K4me3	No Meth/Exp-	no change
PKN3	ENSG00000160447.6	chr9	131464802	131483197	+	131464843	131465830	3	H3K4me3	H3K4me3	H3K4me3	No Meth/Exp+	no change
FNBP1	ENSG00000187239.12	chr9	132649466	132805473	-	132804279	132806003	8	none	H3K4me3	H3K4me3	No Meth/Exp-	no change
LAMC3	ENSG00000050555.13	chr9	133884469	133969860	+	133884359	133885010	2	Bivalent	none	none	No Meth/Exp+	no change
AIF1L	ENSG00000126878.8	chr9	133971863	133998539	+	133971670	133972578	2	H3K4me3	none	none	No Meth/Exp-	no change
C9orf172	ENSG00000232434.1	chr9	139738867	139741797	+	139738276	139744618	17	H3K4me3	H3K4me3	H3K4me3	Meth+/Exp-	Methylated
C9orf139	ENSG00000180539.4	chr9	139921916	139931234	+	139922197	139923447	5	none	H3K4me3	H3K4me3	No Meth/Exp-	no change
ADARB2	ENSG00000185736.11	chr10	1228073	1779670	-	1778784	1780018	12	Bivalent	Bivalent	Bivalent	No Meth/Exp-	no change
AKR1E2	ENSG00000165568.13	chr10	4828821	4890254	+	4868125	4868949	8	Bivalent	H3K27me3	none	Meth+/Exp-	Methylated
PRKCQ	ENSG00000065675.10	chr10	6469105	6622263	-	6621907	6622642	9	Bivalent	Bivalent	H3K4me3	No Meth/Exp-	no change
PRKCQ-AS1	ENSG00000237943.2	chr10	6622381	6658414	+	6621907	6622642	9	Bivalent	Bivalent	H3K4me3	No Meth/Exp-	no change
MCM10	ENSG00000065328.12	chr10	13203554	13253104	+	13203436	13203790	7	none	H3K4me3	H3K4me3	No Meth/Exp+	no change
BEND7	ENSG00000165626.12	chr10	13480484	13570974	-	13570128	13570864	3	Bivalent	none	none	No Meth/Exp+	no change
FAM107B	ENSG00000065809.9	chr10	14560556	14816896	-	14645752	14646705	4	Bivalent	none	H3K4me3	No Meth/Exp-	no change
VIM	ENSG00000026025.9	chr10	17270258	17279592	+	17270430	17272617	15	Bivalent	H3K4me3	Bivalent	Meth+/Exp+	Methylated
SPAG6	ENSG00000077327.11	chr10	22634399	22743153	+	22634000	22634862	12	Bivalent	Bivalent	none	Meth+/Exp-	Methylated
PIP4K2A	ENSG00000150867.9	chr10	22823778	23003484	-	23002155	23003790	7	none	none	H3K4me3	No Meth/Exp-	no change
RP11-85G18.6	ENSG00000262412.1	chr10	27532059	27539733	+	27530938	27531363	6	H3K4me3	H3K4me3	H3K4me3	No Meth/Exp+	no change
ZEB1	ENSG00000148516.17	chr10	31607424	31818742	+	31607227	31610094	31	Bivalent	H3K4me3	none	Meth+/Exp+	Methylated
NRP1	ENSG00000099250.13	chr10	33466420	33625190	-	33623120	33626197	12	Bivalent	H3K4me3	none	No Meth/Exp+	no change
PARD3	ENSG00000148498.11	chr10	34398488	35104253	-	35103124	35105243	6	Bivalent	H3K4me3	none	No Meth/Exp+	no change
PARD3-AS1	ENSG00000226386.1	chr10	35104695	35105314	+	35103124	35105243	6	Bivalent	H3K4me3	none	No Meth/Exp+	no change
RP11-425A6.5	ENSG00000273312.1	chr10	35894929	35897081	-	35896518	35897461	3	none	none	H3K4me3	Meth+/Exp-	Methylable
ANKRD30A	ENSG00000148513.13	chr10	37414785	37673039	+	37414145	37414769	7	none	none	none	No Meth/Exp-	no change
ZWINT	ENSG00000122952.12	chr10	58116989	58121036	-	58121059	58121275	7	H3K4me3	H3K4me3	H3K4me3	No Meth/Exp+	no change
ANK3	ENSG00000151150.16	chr10	61786056	62493248	-	62492785	62493376	3	Bivalent	Bivalent	Bivalent	Meth+/Exp-	Methylable
CDK1	ENSG00000170312.11	chr10	62538089	62554610	+	62537970	62538862	15	H3K4me3	H3K4me3	H3K4me3	No Meth/Exp+	no change
C10orf107	ENSG00000183346.6	chr10	63422719	63526524	+	63422538	63423105	8	none	none	H3K4me3	Meth+/Exp-	Methylated
ZNF365	ENSG00000138311.11	chr10	64133951	64431771	+	64133789	64134420	9	Bivalent	Bivalent	H3K4me3	No Meth/Exp-	no change
JMJD1C-AS1	ENSG00000272767.1	chr10	65224989	65226323	+	65224870	65225887	4	H3K4me3	H3K4me3	H3K4me3	No Meth/Exp+	no change
TSPAN15	ENSG00000099282.5	chr10	71211229	71267425	+	71211116	71211780	7	Bivalent	none	H3K4me3	Meth+/Exp-	Methylable
NPFFR1	ENSG00000148734.7	chr10	72007085	72043432	-	72043446	72043886	3	Bivalent	none	none	Meth+/Exp-	Methylated
NODAL	ENSG00000156574.5	chr10	72192071	72207707	-	72200065	72201368	5	Bivalent	H3K27me3	none	Meth+/Exp+	Methylated
RP11-359E3.4	ENSG00000272631.1	chr10	88509511	88516055	-	88515426	88517217	4	H3K4me3	H3K4me3	H3K4me3	No Meth/Exp+	no change
PAPSS2	ENSG00000198682.8	chr10	89419370	89507462	+	89419346	89420027	6	none	Bivalent	none	Meth+/Exp+	Methylable
RNLS	ENSG00000184719.7	chr10	90033621	90344287	-	90342528	90343221	9	H3K4me3	none	H3K4me3	Meth+/Exp-	Methylated
KIF11	ENSG00000138160.4	chr10	94353043	94415150	+	94352667	94353159	7	H3K4me3	H3K4me3	H3K4me3	No Meth/Exp+	no change
CEP55	ENSG00000138180.11	chr10	95256389	95288849	+	95256133	95256562	8	H3K4me3	none	H3K4me3	No Meth/Exp+	no change
TBC1D12	ENSG00000108239.8	chr10	96162261	96295687	+	96162023	96163327	11	Bivalent	H3K4me3	H3K4me3	No Meth/Exp-	no change
HELLS	ENSG00000119969.10	chr10	96305547	96373662	+	96305116	96305893	12	none	H3K4me3	H3K4me3	No Meth/Exp+	no change
PDLIM1	ENSG00000107438.4	chr10	96997329	97050781	-	97050185	97051124	6	none	Bivalent	H3K27me3	Meth+/Exp+	Methylable
TLL2	ENSG00000095587.8	chr10	98124363	98273675	-	98272207	98273939	11	Bivalent	Bivalent	H3K4me3	No Meth/Exp-	no change
SCD	ENSG00000099194.5	chr10	102106881	102124591	+	102106182	102107722	11	H3K4me3	H3K4me3	none	No Meth/Exp-	no change
HSPA12A	ENSG00000165868.8	chr10	118430703	118502085	-	118500868	118502706	5	Bivalent	Bivalent	H3K4me3	Meth+/Exp-	Methylable
RP11-539I5.1	ENSG00000225302.1	chr10	118592512	118609716	-	118608599	118609377	5	none	Bivalent	H3K4me3	Meth+/Exp-	Methylated
FGFR2	ENSG00000066468.16	chr10	123237848	123357972	-	123356616	123358285	9	H3K4me3	none	none	Meth+/Exp-	Methylable
PLEKHA1	ENSG00000107679.10	chr10	124134212	124191867	+	124134088	124134933	2	none	H3K4me3	H3K4me3	No Meth/Exp-	no change
LHPP	ENSG00000107902.9	chr10	126150403	126306457	+	126150243	126150740	8	none	none	H3K4me3	No Meth/Exp-	no change
FAM53B	ENSG00000189319.9	chr10	126307861	126432838	-	126431314	126433285	11	Bivalent	H3K4me3	H3K4me3	No Meth/Exp-	no change
C10orf90	ENSG00000154493.13	chr10	128113566	128359079	-	128193311	128193531	4	none	none	none	No Meth/Exp-	no change
MKI67	ENSG00000148773.8	chr10	129894923	129924649	-	129923813	129924962	8	none	none	none	No Meth/Exp+	no change
RP11-288G11.3	ENSG00000234531.2	chr10	134596683	134598269	-	134597357	134602649	46	Bivalent	Bivalent	H3K4me3	Meth+/Exp-	Methylated
NKX6-2	ENSG00000148826.6	chr10	134598297	134599556	-	134597357	134602649	46	Bivalent	Bivalent	H3K4me3	Meth+/Exp-	Methylated
PAOX	ENSG00000148832.10	chr10	135192695	135205198	+	135191594	135193307	23	Bivalent	none	H3K4me3	Meth+/Exp-	Methylated
CD151	ENSG00000177697.13	chr11	832843	839831	+	829284	833558	13	Bivalent	Bivalent	H3K4me3	Meth+/Exp+	Methylable
LSP1	ENSG00000130592.9	chr11	1874200	1913497	+	1892037	1892556	9	none	none	none	Meth+/Exp+	Methylated
CYB5R2	ENSG00000166394.10	chr11	7686331	7698453	-	7694711	7695685	7	none	H3K27me3	none	Meth+/Exp-	Methylated
RP11-379P15.1	ENSG00000246820.2	chr11	8190714	8200450	+	8190226	8190671	4	none	none	H3K4me3	No Meth/Exp+	no change
STK33	ENSG00000130413.11	chr11	8413418	8615836	-	8615397	8615889	12	H3K4me3	H3K4me3	Bivalent	No Meth/Exp+	no change
RP11-467K18.2	ENSG00000253973.2	chr11	9025709	9086701	+	9025095	9026315	5	Bivalent	Bivalent	none	Meth+/Exp-	Methylated
SCUBE2	ENSG00000175356.8	chr11	9041071	9159661	-	9112461	9113459	12	Bivalent	Bivalent	none	Meth+/Exp+	Methylable
WEE1	ENSG00000166483.6	chr11	9595228	9615004	+	9594346	9596536	16	H3K4me3	H3K4me3	Bivalent	Meth+/Exp+	Methylated
HTATIP2	ENSG00000109854.9	chr11	20385231	20405329	+	20385161	20385673	12	Bivalent	Bivalent	H3K4me3	Meth+/Exp-	Methylated
SVIP	ENSG00000198168.4	chr11	22835345	22851845	-	22850765	22851367	4	Bivalent	H3K4me3	H3K4me3	No Meth/Exp-	no change
PRR5L	ENSG00000135362.9	chr11	36317838	36486754	+	36397926	36399398	4	Bivalent	H3K4me3	none	No Meth/Exp-	no change
C11orf96	ENSG00000187479.4	chr11	43946892	43965888	+	43963626	43966048	15	Bivalent	Bivalent	none	No Meth/Exp+	no change
PACSIN3	ENSG00000165912.11	chr11	47199076	47207994	-	47207188	47209176	6	H3K4me3	Bivalent	none	Meth+/Exp-	Methylated
FAM111B	ENSG00000189057.6	chr11	58874658	58894883	+	58873889	58874486	3	Bivalent	H3K4me3	H3K4me3	No Meth/Exp+	no change
HRASLS5	ENSG00000168004.5	chr11	63228876	63258666	-	63258378	63258804	8	none	H3K27me3	H3K4me3	Meth+/Exp-	Methylable
PLA2G16	ENSG00000176485.6	chr11	63340667	63384355	-	63381143	63382096	8	none	Bivalent	H3K4me3	Meth+/Exp-	Methylated
FERMT3	ENSG00000149781.8	chr11	63974150	63991354	+	63974829	63975048	3	none	none	H3K4me3	No Meth/Exp+	no change
CDC42EP2	ENSG00000149798.3	chr11	65082289	65089900	+	65081937	65083333	7	H3K4me3	H3K4me3	H3K4me3	No Meth/Exp-	no change
FOSL1	ENSG00000175592.4	chr11	65659520	65668044	-	65666676	65668209	8	Bivalent	Bivalent	none	Meth+/Exp+	Methylable
TMEM151A	ENSG00000179292.4	chr11	66059341	66064135	+	66059287	66059935	3	Bivalent	none	none	No Meth/Exp-	no change
SSH3	ENSG00000172830.8	chr11	67070919	67080078	+	67070807	67071801	6	H3K4me3	none	H3K4me3	Meth+/Exp-	Methylated
CLCF1	ENSG00000175505.9	chr11	67131639	67141648	-	67139887	67141146	4	Bivalent	H3K4me3	H3K4me3	Meth+/Exp+	Methylated
PLEKHB1	ENSG00000021300.9	chr11	73357223	73373864	+	73371800	73372632	3	none	none	H3K4me3	No Meth/Exp-	no change
ARRB1	ENSG00000137486.12	chr11	74975226	75062873	-	75062224	75062977	2	none	H3K4me3	H3K4me3	No Meth/Exp-	no change
LRRC32	ENSG00000137507.7	chr11	76368568	76381791	-	76381449	76382295	7	Bivalent	Bivalent	Bivalent	Meth+/Exp+	Methylated
DLG2	ENSG00000150672.12	chr11	83166055	85338966	-	85339343	85339629	6	H3K4me3	H3K4me3	H3K4me3	No Meth/Exp-	no change
PRSS23	ENSG00000150687.7	chr11	86502101	86663952	+	86511184	86511889	5	Bivalent	H3K4me3	H3K4me3	Meth+/Exp+	Methylated
RP11-867G2.2	ENSG00000257057.1	chr11	94245747	94265289	+	94245546	94245891	3	Bivalent	Bivalent	H3K4me3	No Meth/Exp-	no change
PIWIL4	ENSG00000134627.7	chr11	94277006	94354587	+	94276894	94278913	17	Bivalent	Bivalent	H3K4me3	Meth+/Exp-	Methylated
ENDOD1	ENSG00000149218.4	chr11	94822974	94865809	+	94822597	94823611	6	Bivalent	none	H3K4me3	No Meth/Exp-	no change
CTD-2383M3.1	ENSG00000248027.1	chr11	100554893	100558686	-	100557923	100558401	5	H3K4me3	none	H3K4me3	No Meth/Exp+	no change
C11orf70	ENSG00000137691.8	chr11	101918174	101955291	+	101918073	101918493	7	none	H3K4me3	H3K4me3	No Meth/Exp+	no change
C11orf88	ENSG00000183644.9	chr11	111385510	111407756	+	111385337	111385712	6	Bivalent	H3K27me3	none	Meth+/Exp-	Methylable
AP001891.1	ENSG00000236437.1	chr11	116367616	116371347	-	116371182	116371606	4	none	H3K27me3	none	No Meth/Exp+	no change
BACE1	ENSG00000186318.12	chr11	117156402	117186975	-	117186344	117186979	4	H3K4me3	H3K4me3	H3K4me3	No Meth/Exp-	no change
C11orf63	ENSG00000109944.6	chr11	122753391	122830506	+	122753386	122753951	7	Bivalent	Bivalent	none	Meth+/Exp-	Methylated
FEZ1	ENSG00000149557.8	chr11	125315646	125366213	-	125365137	125366319	8	Bivalent	H3K4me3	H3K4me3	No Meth/Exp-	no change
ST3GAL4	ENSG00000110080.14	chr11	126225535	126310239	+	126225355	126226073	7	H3K4me3	H3K4me3	H3K4me3	Meth+/Exp-	Methylated
ETS1	ENSG00000134954.10	chr11	128328656	128457453	-	128391712	128392611	5	none	H3K4me3	H3K4me3	No Meth/Exp+	no change
TMEM45B	ENSG00000151715.3	chr11	129685714	129729898	+	129685737	129686211	2	none	H3K27me3	none	No Meth/Exp+	no change
ADAMTS15	ENSG00000166106.2	chr11	130318869	130346532	+	130318234	130320198	11	Bivalent	Bivalent	none	Meth+/Exp+	Methylable
JAM3	ENSG00000166086.8	chr11	133938820	134021896	+	133938850	133939681	4	none	H3K4me3	H3K4me3	No Meth/Exp-	no change
RP11-283I3.2	ENSG00000256577.1	chr12	312808	314189	+	312591	313331	3	Bivalent	Bivalent	H3K4me3	Meth+/Exp-	Methylated
FOXM1	ENSG00000111206.8	chr12	2966847	2986206	-	2985978	2986639	6	H3K4me3	H3K4me3	H3K4me3	No Meth/Exp+	no change
TEAD4	ENSG00000197905.4	chr12	3068496	3149839	+	3067960	3069444	9	H3K4me3	H3K4me3	Bivalent	No Meth/Exp+	no change
RP11-264F23.3	ENSG00000256164.1	chr12	4357931	4385350	-	4383193	4384405	8	Bivalent	none	none	No Meth/Exp+	no change
KCNA5	ENSG00000130037.3	chr12	5153085	5155949	+	5153012	5154346	7	Bivalent	H3K27me3	none	Meth+/Exp-	Methylated
DDX12P	ENSG00000214826.4	chr12	9570309	9600825	-	9600415	9601259	13	H3K4me3	H3K4me3	H3K4me3	No Meth/Exp+	no change
CLEC1A	ENSG00000150048.6	chr12	10222153	10264226	-	10264075	10264438	2	none	none	none	No Meth/Exp+	no change
YBX3	ENSG00000060138.8	chr12	10851683	10875911	-	10875137	10876180	6	H3K4me3	Bivalent	none	No Meth/Exp+	no change
APOLD1	ENSG00000178878.8	chr12	12878851	12982909	+	12876630	12879002	15	H3K4me3	H3K4me3	H3K4me3	No Meth/Exp+	no change
GPRC5A	ENSG00000013588.5	chr12	13043716	13070871	+	13044042	13044667	6	Bivalent	Bivalent	none	No Meth/Exp+	no change
TSPAN11	ENSG00000110900.10	chr12	31079362	31149534	+	31079243	31079878	3	Bivalent	none	none	No Meth/Exp+	no change
DDX11	ENSG00000013573.12	chr12	31226779	31257725	+	31226343	31227186	9	H3K4me3	H3K4me3	H3K4me3	No Meth/Exp+	no change
FAM60A	ENSG00000139146.9	chr12	31433518	31479992	-	31476717	31479466	16	H3K4me3	H3K4me3	none	No Meth/Exp+	no change
ADAMTS20	ENSG00000173157.12	chr12	43747669	43945724	-	43944719	43946285	4	Bivalent	Bivalent	Bivalent	No Meth/Exp+	no change
ANO6	ENSG00000177119.11	chr12	45609770	45834187	+	45609713	45610752	11	H3K4me3	H3K4me3	H3K4me3	No Meth/Exp+	no change
DHH	ENSG00000139549.2	chr12	49483204	49488602	-	49487963	49488202	2	Bivalent	none	none	No Meth/Exp+	no change
PRPH	ENSG00000135406.9	chr12	49687035	49692465	+	49688873	49691360	9	Bivalent	H3K27me3	none	Meth+/Exp+	Methylated
TROAP	ENSG00000135451.8	chr12	49717019	49725514	+	49716630	49717018	9	H3K4me3	H3K4me3	H3K4me3	No Meth/Exp+	no change
C1QL4	ENSG00000186897.3	chr12	49726200	49730971	-	49729728	49731162	6	Bivalent	none	none	No Meth/Exp+	no change
FAIM2	ENSG00000135472.4	chr12	50260679	50298000	-	50297580	50297988	5	Bivalent	Bivalent	H3K4me3	No Meth/Exp-	no change
AQP5	ENSG00000161798.6	chr12	50355653	50359464	+	50354839	50356163	6	Bivalent	none	none	Meth+/Exp-	Methylated
GALNT6	ENSG00000139629.11	chr12	51745031	51786651	-	51785279	51785821	6	none	Bivalent	none	Meth+/Exp-	Methylable
RP11-845M18.6	ENSG00000257829.1	chr12	52700400	52702155	-	52701962	52702560	5	Bivalent	H3K27me3	H3K4me3	No Meth/Exp-	no change
KRT83	ENSG00000170523.3	chr12	52708085	52715182	-	52714800	52715051	3	H3K27me3	H3K27me3	none	Meth+/Exp-	Methylated
KRT18	ENSG00000111057.6	chr12	53342655	53346685	+	53342805	53343162	2	H3K4me3	H3K27me3	H3K27me3	No Meth/Exp+	no change
ESPL1	ENSG00000135476.7	chr12	53662083	53687427	+	53661928	53662429	3	none	H3K4me3	none	No Meth/Exp+	no change
SP7	ENSG00000170374.4	chr12	53720362	53739099	-	53738546	53738986	4	Bivalent	Bivalent	H3K4me3	No Meth/Exp-	no change
RP11-686F15.3	ENSG00000260492.1	chr12	54144231	54145619	-	54144562	54145470	5	Bivalent	Bivalent	none	No Meth/Exp+	no change
CDK2	ENSG00000123374.6	chr12	56360553	56366568	+	56360467	56360909	6	H3K4me3	H3K4me3	H3K4me3	No Meth/Exp+	no change
ERBB3	ENSG00000065361.10	chr12	56473641	56497289	+	56472792	56474393	12	none	Bivalent	none	Meth+/Exp-	Methylated
PPM1H	ENSG00000111110.7	chr12	63037762	63328817	-	63328143	63329135	10	H3K4me3	Bivalent	H3K4me3	No Meth/Exp-	no change
PABPC1P4	ENSG00000255642.1	chr12	64215801	64217675	+	64215499	64215990	3	none	none	none	Meth+/Exp-	Methylated
RP11-588G21.2	ENSG00000247131.1	chr12	70107413	70132348	-	70132340	70133559	9	Bivalent	Bivalent	H3K4me3	No Meth/Exp+	no change
KCNMB4	ENSG00000135643.4	chr12	70760056	70828072	+	70759437	70761052	8	Bivalent	Bivalent	none	No Meth/Exp-	no change
PHLDA1	ENSG00000139289.9	chr12	76419227	76427712	-	76424634	76426316	7	none	H3K4me3	H3K4me3	No Meth/Exp+	no change
CSRP2	ENSG00000175183.5	chr12	77252495	77272840	-	77272632	77273216	7	H3K4me3	H3K4me3	H3K4me3	No Meth/Exp+	no change
E2F7	ENSG00000165891.11	chr12	77415027	77459360	-	77458947	77459942	13	H3K4me3	H3K4me3	H3K4me3	No Meth/Exp+	no change
TMTC2	ENSG00000179104.4	chr12	83080659	83528649	+	83080662	83081646	7	Bivalent	H3K4me3	H3K4me3	No Meth/Exp-	no change
TMCC3	ENSG00000057704.6	chr12	94960900	95044338	-	95043551	95044312	4	Bivalent	Bivalent	H3K4me3	No Meth/Exp-	no change
HAL	ENSG00000084110.6	chr12	96366440	96390143	-	96389405	96389675	3	none	none	none	No Meth/Exp+	no change
ANO4	ENSG00000151572.12	chr12	101111304	101522419	+	101109863	101111622	4	Bivalent	Bivalent	H3K27me3	Meth+/Exp-	Methylated
DRAM1	ENSG00000136048.9	chr12	102271129	102405908	+	102270754	102271801	6	Bivalent	Bivalent	H3K4me3	No Meth/Exp+	no change
ASCL1	ENSG00000139352.3	chr12	103351464	103354294	+	103351579	103352695	9	Bivalent	Bivalent	Bivalent	No Meth/Exp+	no change
NUAK1	ENSG00000074590.9	chr12	106457118	106533811	-	106532106	106533696	7	H3K4me3	H3K4me3	H3K4me3	Meth+/Exp-	Methylable
TRPV4	ENSG00000111199.6	chr12	110220890	110271212	-	110271000	110271582	5	none	Bivalent	none	Meth+/Exp+	Methylated
GLTP	ENSG00000139433.5	chr12	110288748	110318293	-	110318011	110318778	4	none	none	H3K4me3	No Meth/Exp-	no change
LHX5	ENSG00000089116.3	chr12	113899839	113910085	-	113908887	113910681	10	Bivalent	none	H3K27me3	Meth+/Exp+	Methylable
RP11-82C23.2	ENSG00000257935.2	chr12	113909808	113918429	+	113908887	113910681	10	Bivalent	none	H3K27me3	Meth+/Exp+	Methylable
TBX3	ENSG00000135111.10	chr12	115108059	115121969	-	115120774	115122945	14	Bivalent	Bivalent	Bivalent	No Meth/Exp+	no change
RPLP0	ENSG00000089157.11	chr12	120634489	120639038	-	120638588	120639116	9	H3K4me3	H3K4me3	H3K4me3	No Meth/Exp+	no change
SKA3	ENSG00000165480.11	chr13	21727734	21750741	-	21750287	21751332	13	H3K4me3	H3K4me3	H3K4me3	No Meth/Exp+	no change
ZDHHC20	ENSG00000180776.11	chr13	21950263	22033509	-	22032862	22033730	8	H3K4me3	none	H3K4me3	No Meth/Exp-	no change
TNFRSF19	ENSG00000127863.11	chr13	24144509	24250232	+	24152899	24154140	12	Bivalent	none	H3K4me3	Meth+/Exp+	Methylated
AMER2	ENSG00000165566.11	chr13	25735822	25746426	-	25743998	25746127	10	Bivalent	Bivalent	H3K4me3	No Meth/Exp-	no change
SHISA2	ENSG00000180730.4	chr13	26618735	26625169	-	26624725	26626265	9	Bivalent	none	Bivalent	Meth+/Exp-	Methylable
BRCA2	ENSG00000139618.10	chr13	32889611	32973805	+	32889533	32889900	4	H3K4me3	H3K4me3	H3K4me3	No Meth/Exp+	no change
CCDC122	ENSG00000151773.8	chr13	44398045	44453827	-	44453207	44454295	13	Bivalent	Bivalent	H3K4me3	Meth+/Exp-	Methylated
LACC1	ENSG00000179630.6	chr13	44453420	44468068	+	44453207	44454295	13	Bivalent	Bivalent	H3K4me3	Meth+/Exp-	Methylated
FAM124A	ENSG00000150510.11	chr13	51796503	51858377	+	51796492	51796888	2	none	Bivalent	H3K4me3	No Meth/Exp-	no change
LECT1	ENSG00000136110.8	chr13	53277399	53313947	-	53313127	53314045	4	Bivalent	H3K27me3	Bivalent	Meth+/Exp-	Methylated
DIAPH3	ENSG00000139734.13	chr13	60239717	60738121	-	60737660	60738285	8	H3K4me3	H3K4me3	H3K4me3	No Meth/Exp+	no change
PCDH9	ENSG00000184226.10	chr13	66876967	67804468	-	67804593	67805459	8	none	H3K4me3	H3K4me3	No Meth/Exp-	no change
SLAIN1	ENSG00000139737.17	chr13	78272023	78338377	+	78271801	78272906	12	none	H3K4me3	H3K4me3	No Meth/Exp-	no change
NDFIP2	ENSG00000102471.9	chr13	80055287	80130210	+	80055066	80055713	9	H3K4me3	none	H3K4me3	No Meth/Exp-	no change
DOCK9-AS2	ENSG00000260992.1	chr13	99740073	99740879	+	99738331	99740225	5	Bivalent	Bivalent	H3K4me3	Meth+/Exp-	Methylable
TMTC4	ENSG00000125247.11	chr13	101256181	101327347	-	101326329	101327723	10	none	none	H3K4me3	No Meth/Exp-	no change
COL4A1	ENSG00000187498.10	chr13	110801318	110959496	-	110958891	110960590	10	Bivalent	H3K4me3	Bivalent	Meth+/Exp+	Methylable
COL4A2	ENSG00000134871.13	chr13	110958159	111165374	+	110958891	110960590	10	Bivalent	H3K4me3	Bivalent	Meth+/Exp+	Methylable
RAB20	ENSG00000139832.3	chr13	111175417	111214080	-	111213589	111214477	8	none	Bivalent	none	No Meth/Exp+	no change
KLHL33	ENSG00000185271.6	chr14	20896970	20903801	-	20903395	20903720	4	none	H3K27me3	H3K4me3	Meth+/Exp-	Methylated
MMP14	ENSG00000157227.8	chr14	23305766	23318236	+	23305893	23307013	5	none	none	none	Meth+/Exp+	Methylated
AJUBA	ENSG00000129474.11	chr14	23440383	23451851	-	23449886	23452174	12	Bivalent	H3K4me3	Bivalent	Meth+/Exp+	Methylated
CBLN3	ENSG00000139899.6	chr14	24895738	24900160	-	24898779	24899288	11	H3K4me3	H3K4me3	H3K4me3	Meth+/Exp-	Methylated
STXBP6	ENSG00000168952.11	chr14	25278862	25519503	-	25518424	25519612	3	Bivalent	none	H3K4me3	No Meth/Exp-	no change
EGLN3	ENSG00000129521.9	chr14	34393437	34931980	-	34419508	34420438	10	Bivalent	Bivalent	Bivalent	Meth+/Exp-	Methylated
CFL2	ENSG00000165410.10	chr14	35179593	35184029	-	35183385	35184196	6	H3K4me3	none	H3K4me3	No Meth/Exp-	no change
SLC25A21	ENSG00000183032.6	chr14	37147636	37642071	-	37641232	37641879	5	H3K4me3	H3K4me3	none	No Meth/Exp+	no change
ABHD12B	ENSG00000131969.10	chr14	51338878	51371688	+	51338712	51339146	3	Bivalent	H3K27me3	H3K4me3	Meth+/Exp-	Methylated
DLGAP5	ENSG00000126787.8	chr14	55614830	55658396	-	55658232	55658550	3	H3K4me3	H3K4me3	H3K4me3	No Meth/Exp+	no change
LRRC9	ENSG00000131951.6	chr14	60386431	60530277	+	60386271	60386750	4	H3K4me3	H3K4me3	H3K4me3	Meth+/Exp-	Methylable
SIX6	ENSG00000184302.6	chr14	60975669	60979568	+	60975732	60978180	16	Bivalent	none	none	Meth+/Exp+	Methylable
SIX4	ENSG00000100625.8	chr14	61176246	61191066	-	61188116	61190772	13	H3K4me3	H3K4me3	none	No Meth/Exp+	no change
SYNE2	ENSG00000054654.11	chr14	64319683	64693165	+	64319622	64320526	4	none	H3K4me3	none	No Meth/Exp+	no change
HSPA2	ENSG00000126803.8	chr14	65002623	65009955	+	65006874	65009197	17	none	none	none	Meth+/Exp-	Methylated
PPP1R36	ENSG00000165807.3	chr14	65016620	65056098	+	65016516	65016909	6	Bivalent	Bivalent	none	Meth+/Exp-	Methylated
PLEKHG3	ENSG00000126822.11	chr14	65170820	65213610	+	65170876	65172007	8	Bivalent	none	H3K4me3	No Meth/Exp-	no change
FUT8	ENSG00000033170.12	chr14	65877310	66210839	+	65878486	65880370	9	H3K4me3	H3K4me3	H3K4me3	No Meth/Exp-	no change
PLEK2	ENSG00000100558.4	chr14	67853700	67878917	-	67878534	67879167	6	Bivalent	none	none	Meth+/Exp+	Methylated
CCDC177	ENSG00000255994.1	chr14	70037483	70038032	-	70038108	70040302	8	Bivalent	H3K4me3	none	No Meth/Exp-	no change
PSEN1	ENSG00000080815.14	chr14	73603126	73690399	+	73602898	73603747	6	H3K4me3	H3K4me3	H3K4me3	No Meth/Exp-	no change
HEATR4	ENSG00000187105.4	chr14	73945189	74025651	-	73957750	73958889	6	none	H3K4me3	H3K4me3	Meth+/Exp-	Methylated
LTBP2	ENSG00000119681.7	chr14	74964873	75079306	-	75077317	75079596	11	Bivalent	Bivalent	none	Meth+/Exp+	Methylated
PGF	ENSG00000119630.9	chr14	75408537	75422487	-	75422068	75422507	2	Bivalent	none	none	No Meth/Exp+	no change
ZC2HC1C	ENSG00000119703.12	chr14	75530873	75545126	+	75535825	75536376	6	H3K4me3	H3K4me3	H3K4me3	Meth+/Exp-	Methylable
RP11-293M10.5	ENSG00000259687.1	chr14	75761107	75763341	+	75760750	75761214	4	H3K4me3	H3K4me3	H3K4me3	No Meth/Exp+	no change
FLVCR2	ENSG00000119686.5	chr14	76044960	76129557	+	76044590	76045102	6	Bivalent	H3K4me3	none	No Meth/Exp+	no change
SPTLC2	ENSG00000100596.2	chr14	77972340	78083116	-	78082584	78083250	6	H3K4me3	H3K4me3	H3K4me3	No Meth/Exp-	no change
NRXN3	ENSG00000021645.13	chr14	78708734	80330762	+	79745153	79746059	6	Bivalent	Bivalent	H3K4me3	No Meth/Exp-	no change
TSHR	ENSG00000165409.11	chr14	81421333	81612646	+	81421294	81421561	4	Bivalent	none	none	No Meth/Exp+	no change
CALM1	ENSG00000198668.6	chr14	90862846	90874605	+	90863043	90864903	12	none	H3K4me3	H3K4me3	No Meth/Exp-	no change
PRIMA1	ENSG00000175785.8	chr14	94184644	94254827	-	94253952	94255733	10	Bivalent	Bivalent	none	Meth+/Exp-	Methylated
ASB2	ENSG00000100628.7	chr14	94400499	94443137	-	94405235	94406170	3	none	none	none	Meth+/Exp-	Methylated
GSC	ENSG00000133937.3	chr14	95234553	95236562	-	95234612	95236569	12	Bivalent	none	Bivalent	Meth+/Exp+	Methylated
CLMN	ENSG00000165959.7	chr14	95648277	95786243	-	95785752	95786151	4	Bivalent	none	H3K4me3	No Meth/Exp-	no change
AK7	ENSG00000140057.4	chr14	96858448	96955764	+	96857611	96858125	4	none	none	H3K4me3	No Meth/Exp-	no change
TECPR2	ENSG00000196663.11	chr14	102829300	102968818	+	102829156	102829873	10	H3K4me3	H3K4me3	H3K4me3	No Meth/Exp-	no change
LINC00637	ENSG00000258735.1	chr14	104314058	104324386	+	104313161	104314990	9	Bivalent	Bivalent	H3K4me3	Meth+/Exp+	Methylable
AHNAK2	ENSG00000185567.6	chr14	105403581	105444694	-	105444319	105445225	9	none	Bivalent	H3K4me3	Meth+/Exp-	Methylated
NIPA1	ENSG00000170113.11	chr15	23043277	23100005	-	23085441	23086898	11	H3K4me3	H3K4me3	H3K4me3	No Meth/Exp-	no change
RP11-566K19.6	ENSG00000259344.1	chr15	23095170	23115256	-	23115057	23115471	5	none	none	H3K4me3	Meth+/Exp-	Methylable
RP11-758N13.1	ENSG00000259721.1	chr15	33009471	33011208	-	33009530	33011696	7	Bivalent	Bivalent	Bivalent	Meth+/Exp-	Methylable
GREM1	ENSG00000166923.6	chr15	33010175	33026870	+	33009530	33011696	7	Bivalent	Bivalent	Bivalent	Meth+/Exp-	Methylable
THBS1	ENSG00000137801.9	chr15	39873280	39891667	+	39872527	39873567	13	none	H3K4me3	none	Meth+/Exp+	Methylated
BMF	ENSG00000104081.9	chr15	40380091	40401093	-	40401053	40401298	9	H3K4me3	H3K4me3	H3K4me3	No Meth/Exp+	no change
BUB1B	ENSG00000156970.8	chr15	40453224	40513337	+	40453005	40453685	11	H3K4me3	H3K4me3	H3K4me3	No Meth/Exp+	no change
CASC5	ENSG00000137812.15	chr15	40886218	40956540	+	40886396	40886918	5	H3K4me3	H3K4me3	H3K4me3	No Meth/Exp+	no change
DLL4	ENSG00000128917.5	chr15	41221538	41231237	+	41217789	41223180	21	Bivalent	Bivalent	Bivalent	No Meth/Exp+	no change
EXD1	ENSG00000178997.7	chr15	41474923	41522941	-	41522828	41523732	14	H3K4me3	none	H3K4me3	Meth+/Exp-	Methylable
NUSAP1	ENSG00000137804.8	chr15	41624892	41673248	+	41624362	41625340	15	H3K4me3	H3K4me3	H3K4me3	No Meth/Exp+	no change
TYRO3	ENSG00000092445.7	chr15	41849873	41871536	+	41851723	41851970	2	none	H3K4me3	H3K4me3	No Meth/Exp-	no change
RP11-473C18.3	ENSG00000261687.1	chr15	43476277	43477339	-	43477588	43477816	4	H3K4me3	H3K4me3	H3K4me3	No Meth/Exp+	no change
SECISBP2L	ENSG00000138593.4	chr15	49280673	49338760	-	49338363	49338771	3	H3K4me3	H3K4me3	H3K4me3	No Meth/Exp-	no change
GLDN	ENSG00000186417.9	chr15	51633826	51700210	+	51633724	51634318	4	Bivalent	H3K27me3	H3K4me3	No Meth/Exp-	no change
PRTG	ENSG00000166450.8	chr15	55903744	56035288	-	56034562	56035712	9	Bivalent	H3K4me3	Bivalent	No Meth/Exp+	no change
CCNB2	ENSG00000157456.3	chr15	59397277	59417244	+	59397270	59397749	3	H3K4me3	H3K4me3	H3K4me3	No Meth/Exp+	no change
CA12	ENSG00000074410.9	chr15	63613577	63674360	-	63673888	63674160	5	Bivalent	Bivalent	Bivalent	No Meth/Exp+	no change
DAPK2	ENSG00000035664.7	chr15	64199235	64364232	-	64338152	64338886	3	Bivalent	H3K4me3	none	No Meth/Exp-	no change
MEGF11	ENSG00000157890.13	chr15	66187417	66546085	-	66544432	66546134	4	Bivalent	Bivalent	none	No Meth/Exp+	no change
CORO2B	ENSG00000103647.8	chr15	68871308	69020145	+	68870633	68871974	10	Bivalent	H3K4me3	H3K4me3	No Meth/Exp-	no change
LINC00277	ENSG00000212766.5	chr15	69365266	69388160	+	69366321	69366796	4	Bivalent	Bivalent	H3K4me3	Meth+/Exp-	Methylable
GLCE	ENSG00000138604.5	chr15	69452923	69564556	+	69452451	69453939	7	Bivalent	none	H3K4me3	No Meth/Exp-	no change
KIF23	ENSG00000137807.9	chr15	69706585	69740764	+	69706516	69707352	11	H3K4me3	H3K4me3	H3K4me3	No Meth/Exp+	no change
LARP6	ENSG00000166173.9	chr15	71123863	71146498	-	71145995	71146820	4	H3K4me3	none	H3K4me3	No Meth/Exp-	no change
NEO1	ENSG00000067141.12	chr15	73344051	73597547	+	73343779	73345369	7	H3K4me3	H3K4me3	H3K4me3	No Meth/Exp-	no change
RPP25	ENSG00000178718.5	chr15	75246757	75249805	-	75248277	75249922	11	Bivalent	Bivalent	none	Meth+/Exp-	Methylated
DNAJA4	ENSG00000140403.8	chr15	78556428	78574538	+	78556405	78557542	11	Bivalent	H3K27me3	H3K4me3	Meth+/Exp-	Methylated
STARD5	ENSG00000172345.9	chr15	81601394	81616524	-	81616253	81616963	10	none	Bivalent	H3K4me3	No Meth/Exp-	no change
CPEB1	ENSG00000214575.5	chr15	83211951	83317612	-	83315116	83317541	13	Bivalent	Bivalent	H3K4me3	Meth+/Exp-	Methylated
RP11-752G15.3	ENSG00000259462.1	chr15	83316521	83361572	+	83315116	83317541	13	Bivalent	Bivalent	H3K4me3	Meth+/Exp-	Methylated
SH3GL3	ENSG00000140600.12	chr15	84115980	84287495	+	84115762	84116921	10	Bivalent	Bivalent	H3K4me3	No Meth/Exp-	no change
NMB	ENSG00000197696.5	chr15	85198360	85201794	-	85201196	85201684	3	H3K4me3	none	H3K4me3	No Meth/Exp+	no change
PDE8A	ENSG00000073417.10	chr15	85523671	85682376	+	85523512	85525865	11	Bivalent	Bivalent	H3K4me3	Meth+/Exp-	Methylable
HAPLN3	ENSG00000140511.7	chr15	89420519	89438857	-	89438176	89438850	5	Bivalent	Bivalent	H3K27me3	Meth+/Exp+	Methylated
RP11-217B1.2	ENSG00000261441.1	chr15	89878284	89879392	+	89877597	89878597	6	Bivalent	Bivalent	H3K4me3	No Meth/Exp+	no change
TICRR	ENSG00000140534.9	chr15	90118713	90174287	+	90118971	90119363	4	H3K4me3	H3K4me3	none	No Meth/Exp+	no change
ANPEP	ENSG00000166825.9	chr15	90328120	90358633	-	90357402	90358573	5	Bivalent	H3K27me3	H3K27me3	Meth+/Exp+	Methylated
MAN2A2	ENSG00000196547.10	chr15	91445448	91465814	+	91445563	91446768	7	Bivalent	H3K4me3	H3K4me3	No Meth/Exp-	no change
SLCO3A1	ENSG00000176463.9	chr15	92396925	92715665	+	92396013	92397682	10	Bivalent	Bivalent	H3K4me3	Meth+/Exp-	Methylable
RP11-66B24.2	ENSG00000232386.5	chr15	101389766	101402376	+	101389732	101390260	4	none	none	none	No Meth/Exp-	no change
RP11-66B24.7	ENSG00000272808.1	chr15	101390036	101404501	+	101389732	101390260	4	none	none	none	No Meth/Exp-	no change
ALDH1A3	ENSG00000184254.12	chr15	101417919	101456831	+	101419261	101421133	14	Bivalent	none	none	Meth+/Exp-	Methylated
PCSK6	ENSG00000140479.12	chr15	101840818	102065405	-	102028860	102030608	4	Bivalent	none	none	Meth+/Exp-	Methylated
TARSL2	ENSG00000185418.11	chr15	102193801	102264807	-	102264097	102264750	4	H3K4me3	H3K4me3	H3K4me3	No Meth/Exp-	no change
HBA2	ENSG00000188536.8	chr16	222846	223709	+	222369	223447	4	H3K27me3	H3K27me3	none	No Meth/Exp+	no change
LA16c-366D3.1	ENSG00000260439.1	chr16	971033	984495	+	971429	971825	3	none	none	none	Meth+/Exp-	Methylated
TMEM204	ENSG00000131634.9	chr16	1578689	1605581	+	1583809	1584641	8	none	none	H3K4me3	No Meth/Exp+	no change
MMP25	ENSG00000008516.12	chr16	3096682	3110727	+	3095600	3097033	10	Bivalent	Bivalent	H3K27me3	No Meth/Exp+	no change
RP11-473M20.16	ENSG00000261889.1	chr16	3206737	3207484	-	3207597	3209413	6	Bivalent	H3K4me3	none	No Meth/Exp+	no change
ROGDI	ENSG00000067836.8	chr16	4846969	4852951	-	4852117	4853176	9	H3K4me3	H3K4me3	H3K4me3	No Meth/Exp-	no change
GRIN2A	ENSG00000183454.9	chr16	9852376	10276611	-	10273943	10277424	22	Bivalent	H3K27me3	none	Meth+/Exp-	Methylable
LITAF	ENSG00000189067.8	chr16	11641853	11730237	-	11680008	11681275	9	none	Bivalent	none	Meth+/Exp-	Methylated
CPPED1	ENSG00000103381.7	chr16	12756919	12897874	-	12897365	12897889	6	H3K4me3	H3K4me3	H3K4me3	Meth+/Exp-	Methylated
NDE1	ENSG00000072864.8	chr16	15737124	15820210	+	15743759	15744423	4	H3K4me3	H3K4me3	H3K4me3	No Meth/Exp-	no change
TMC7	ENSG00000170537.8	chr16	18995256	19075264	+	18995156	18995577	5	none	H3K4me3	H3K4me3	No Meth/Exp-	no change
CCP110	ENSG00000103540.12	chr16	19535133	19564730	+	19535074	19535635	10	H3K4me3	H3K4me3	H3K4me3	No Meth/Exp-	no change
GPRC5B	ENSG00000167191.7	chr16	19868616	19897489	-	19894965	19897156	11	H3K4me3	H3K4me3	H3K4me3	Meth+/Exp-	Methylated
USP31	ENSG00000103404.10	chr16	23072727	23160591	-	23159966	23160966	6	H3K4me3	none	H3K4me3	No Meth/Exp-	no change
CHP2	ENSG00000166869.2	chr16	23765948	23770272	+	23765969	23766869	4	Bivalent	H3K27me3	none	Meth+/Exp-	Methylable
TGFB1I1	ENSG00000140682.14	chr16	31482906	31489281	+	31483276	31483646	4	Bivalent	H3K4me3	none	No Meth/Exp+	no change
IRX3	ENSG00000177508.11	chr16	54317216	54320675	-	54317821	54324604	30	Bivalent	H3K4me3	H3K27me3	Meth+/Exp+	Methylated
MMP2	ENSG00000087245.8	chr16	55423612	55540603	+	55513220	55513526	3	Bivalent	none	none	No Meth/Exp+	no change
MT2A	ENSG00000125148.6	chr16	56642111	56643409	+	56642129	56642595	5	Bivalent	Bivalent	H3K4me3	Meth+/Exp+	Methylated
MT1X	ENSG00000187193.8	chr16	56716336	56718108	+	56715992	56716425	6	none	Bivalent	H3K4me3	No Meth/Exp+	no change
PLLP	ENSG00000102934.5	chr16	57290004	57318599	-	57317967	57318964	13	Bivalent	Bivalent	none	Meth+/Exp-	Methylated
CMTM3	ENSG00000140931.15	chr16	66637777	66647795	+	66638254	66639561	11	H3K4me3	H3K4me3	H3K4me3	No Meth/Exp+	no change
CES4A	ENSG00000172824.10	chr16	67022492	67043661	+	67034470	67035340	3	Bivalent	Bivalent	H3K4me3	Meth+/Exp-	Methylated
EXOC3L1	ENSG00000179044.11	chr16	67218269	67224107	-	67217716	67219219	11	Bivalent	Bivalent	H3K4me3	Meth+/Exp+	Methylated
PLEKHG4	ENSG00000196155.8	chr16	67311413	67323402	+	67312896	67313731	9	none	none	none	Meth+/Exp-	Methylated
TPPP3	ENSG00000159713.6	chr16	67423712	67427438	-	67427284	67428950	10	Bivalent	none	none	Meth+/Exp-	Methylated
HSD11B2	ENSG00000176387.6	chr16	67464555	67471456	+	67464388	67465462	9	Bivalent	none	none	Meth+/Exp+	Methylated
MARVELD3	ENSG00000140832.5	chr16	71660064	71676017	+	71659829	71660747	8	none	Bivalent	none	No Meth/Exp+	no change
FA2H	ENSG00000103089.4	chr16	74746853	74808729	-	74808313	74808986	6	Bivalent	Bivalent	none	No Meth/Exp-	no change
ADAMTS18	ENSG00000140873.11	chr16	77281710	77469011	-	77468309	77469074	5	Bivalent	H3K27me3	none	No Meth/Exp-	no change
ASPA	ENSG00000108381.6	chr17	3375668	3406713	+	3375006	3375237	4	none	none	none	No Meth/Exp-	no change
GSG2	ENSG00000177602.4	chr17	3627211	3630067	+	3626924	3627839	10	H3K4me3	H3K4me3	H3K4me3	No Meth/Exp+	no change
CHRNE	ENSG00000108556.7	chr17	4801069	4806369	-	4802265	4805402	16	none	none	H3K4me3	Meth+/Exp+	Methylated
FAM64A	ENSG00000129195.11	chr17	6347735	6354789	+	6347465	6348111	10	H3K4me3	H3K4me3	H3K4me3	No Meth/Exp+	no change
BCL6B	ENSG00000161940.6	chr17	6926339	6933609	+	6925400	6927527	10	Bivalent	none	none	Meth+/Exp+	Methylable
TP53	ENSG00000141510.11	chr17	7565097	7590856	-	7591494	7591839	7	H3K4me3	H3K4me3	H3K4me3	No Meth/Exp+	no change
HES7	ENSG00000179111.4	chr17	8023908	8027410	-	8024758	8026862	5	Bivalent	Bivalent	H3K4me3	No Meth/Exp+	no change
VAMP2	ENSG00000220205.4	chr17	8062467	8066864	-	8065909	8066494	6	H3K4me3	H3K4me3	H3K4me3	No Meth/Exp-	no change
AURKB	ENSG00000178999.8	chr17	8108056	8113918	-	8113632	8113966	5	H3K4me3	H3K4me3	H3K4me3	No Meth/Exp+	no change
GAS7	ENSG00000007237.14	chr17	9813926	10101868	-	10101034	10102440	5	Bivalent	Bivalent	H3K4me3	Meth+/Exp-	Methylable
TVP23C	ENSG00000175106.12	chr17	15341205	15466909	-	15466359	15466843	5	H3K4me3	H3K4me3	none	Meth+/Exp-	Methylated
CENPV	ENSG00000166582.5	chr17	16245848	16256970	-	16255618	16257148	13	none	Bivalent	H3K4me3	Meth+/Exp-	Methylated
SNORD3B-2	ENSG00000262074.3	chr17	18966762	18967449	-	18966946	18967196	2	none	none	none	No Meth/Exp+	no change
CCDC144NL	ENSG00000205212.3	chr17	20739760	20799453	-	20798957	20800112	11	none	none	none	Meth+/Exp-	Methylated
TIAF1	ENSG00000221995.4	chr17	27400537	27418537	-	27406753	27408059	2	none	none	none	No Meth/Exp-	no change
TMEM98	ENSG00000006042.7	chr17	31254928	31272124	+	31254874	31255392	3	none	H3K4me3	Bivalent	No Meth/Exp-	no change
PNMT	ENSG00000141744.3	chr17	37824234	37826728	+	37823693	37824989	9	Bivalent	none	none	Meth+/Exp-	Methylated
TOP2A	ENSG00000131747.10	chr17	38544768	38574202	-	38573716	38574243	8	H3K4me3	H3K4me3	none	No Meth/Exp+	no change
JUP	ENSG00000173801.12	chr17	39775692	39943183	-	39942175	39943176	10	H3K4me3	H3K4me3	none	Meth+/Exp-	Methylable
HAP1	ENSG00000173805.11	chr17	39873994	39890896	-	39889956	39891489	11	Bivalent	Bivalent	H3K4me3	No Meth/Exp+	no change
RAMP2	ENSG00000131477.6	chr17	40910465	40915059	+	40912816	40913553	5	Bivalent	none	none	No Meth/Exp+	no change
NAGS	ENSG00000161653.6	chr17	42081914	42086431	+	42082027	42084972	16	Bivalent	Bivalent	none	Meth+/Exp+	Methylated
GJC1	ENSG00000182963.5	chr17	42875816	42908184	-	42906810	42908061	4	H3K4me3	H3K4me3	Bivalent	Meth+/Exp+	Methylable
KIF18B	ENSG00000186185.9	chr17	43002077	43025082	-	43024658	43025344	10	H3K4me3	none	none	No Meth/Exp+	no change
C1QL1	ENSG00000131094.3	chr17	43037061	43045439	-	43044369	43046424	13	Bivalent	Bivalent	none	No Meth/Exp+	no change
MAPT-AS1	ENSG00000264589.1	chr17	43921017	43972966	-	43971410	43975040	21	Bivalent	Bivalent	H3K4me3	Meth+/Exp+	Methylated
ITGB3	ENSG00000259207.3	chr17	45331212	45421658	+	45330928	45331766	3	Bivalent	none	none	No Meth/Exp+	no change
SP6	ENSG00000189120.3	chr17	45922279	45933240	-	45928211	45928710	2	Bivalent	none	H3K27me3	No Meth/Exp+	no change
COL1A1	ENSG00000108821.9	chr17	48260650	48278993	-	48276877	48279008	9	Bivalent	H3K27me3	none	Meth+/Exp+	Methylable
CHAD	ENSG00000136457.5	chr17	48541857	48546327	-	48545570	48546900	12	none	H3K27me3	none	Meth+/Exp-	Methylated
TOM1L1	ENSG00000141198.9	chr17	52976748	53039310	+	52977866	52978307	8	H3K4me3	Bivalent	none	Meth+/Exp-	Methylated
PCTP	ENSG00000141179.9	chr17	53828340	53920191	+	53828422	53828738	2	H3K4me3	H3K4me3	H3K4me3	No Meth/Exp+	no change
DGKE	ENSG00000153933.5	chr17	54911460	54946036	+	54910496	54912470	9	Bivalent	H3K4me3	H3K4me3	Meth+/Exp-	Methylated
2004-09-01	ENSG00000108387.10	chr17	56597611	56618179	-	56609025	56609583	6	Bivalent	Bivalent	H3K4me3	No Meth/Exp-	no change
YPEL2	ENSG00000175155.4	chr17	57409050	57479090	+	57408787	57410145	9	Bivalent	H3K4me3	H3K4me3	No Meth/Exp-	no change
RP11-332H18.5	ENSG00000267131.1	chr17	59439029	59477604	-	59473060	59483266	47	Bivalent	Bivalent	none	Meth+/Exp+	Methylated
C17orf82	ENSG00000187013.2	chr17	59489112	59490641	+	59488115	59490485	13	Bivalent	Bivalent	Bivalent	Meth+/Exp+	Methylable
CACNG5	ENSG00000075429.4	chr17	64831235	64881603	+	64831193	64831574	3	Bivalent	H3K27me3	none	Meth+/Exp-	Methylated
FAM20A	ENSG00000108950.7	chr17	66531254	66597530	-	66596072	66597578	6	Bivalent	Bivalent	none	No Meth/Exp+	no change
ABCA5	ENSG00000154265.11	chr17	67240452	67323385	-	67322709	67323837	8	Bivalent	Bivalent	H3K4me3	Meth+/Exp-	Methylated
KCNJ2-AS1	ENSG00000267365.1	chr17	68163102	68165543	-	68164913	68165720	5	Bivalent	H3K4me3	none	No Meth/Exp-	no change
KCNJ2	ENSG00000123700.4	chr17	68164814	68176189	+	68164913	68165720	5	Bivalent	H3K4me3	none	No Meth/Exp-	no change
LINC00511	ENSG00000227036.2	chr17	70319264	70636611	-	70587771	70589080	4	Bivalent	Bivalent	Bivalent	No Meth/Exp+	no change
KIF19	ENSG00000196169.10	chr17	72322349	72351959	+	72321948	72322461	5	Bivalent	none	none	Meth+/Exp-	Methylated
HID1	ENSG00000167861.11	chr17	72946838	72969261	-	72968167	72969164	7	Bivalent	Bivalent	H3K4me3	Meth+/Exp-	Methylable
RNF157-AS1	ENSG00000267128.1	chr17	74136637	74150731	+	74135922	74137802	10	Bivalent	H3K4me3	H3K27me3	Meth+/Exp+	Methylated
TMC6	ENSG00000141524.11	chr17	76106539	76128488	-	76127521	76128406	3	Bivalent	H3K27me3	none	No Meth/Exp-	no change
AFMID	ENSG00000183077.11	chr17	76183398	76203782	+	76183077	76183449	7	H3K4me3	H3K4me3	H3K4me3	No Meth/Exp-	no change
TMEM235	ENSG00000204278.8	chr17	76227391	76237068	+	76228110	76228380	2	Bivalent	none	Bivalent	Meth+/Exp-	Methylated
SOCS3	ENSG00000184557.3	chr17	76352864	76356158	-	76354818	76357038	14	Bivalent	H3K4me3	none	Meth+/Exp+	Methylated
RP11-806H10.4	ENSG00000266970.1	chr17	76356534	76369992	+	76354818	76357038	14	Bivalent	H3K4me3	none	Meth+/Exp+	Methylated
SECTM1	ENSG00000141574.3	chr17	80278900	80291950	-	80291020	80292394	7	H3K27me3	H3K27me3	none	Meth+/Exp+	Methylated
C18orf56	ENSG00000176912.3	chr18	641320	658340	-	657401	658745	12	H3K4me3	H3K4me3	H3K4me3	No Meth/Exp-	no change
ENOSF1	ENSG00000132199.14	chr18	670324	712676	-	712232	713086	6	H3K4me3	Bivalent	Bivalent	Meth+/Exp-	Methylable
NDC80	ENSG00000080986.8	chr18	2571510	2616634	+	2571286	2571580	9	H3K4me3	H3K4me3	H3K4me3	No Meth/Exp+	no change
RAB31	ENSG00000168461.8	chr18	9708162	9862548	+	9707752	9709311	9	Bivalent	H3K4me3	H3K4me3	No Meth/Exp+	no change
PIEZO2	ENSG00000154864.7	chr18	10666480	11148587	-	11148307	11149936	13	Bivalent	Bivalent	Bivalent	Meth+/Exp-	Methylable
RP11-815J4.6	ENSG00000256616.2	chr18	12073231	12076653	-	12076434	12076799	2	none	none	none	No Meth/Exp-	no change
TUBB6	ENSG00000176014.8	chr18	12307668	12344319	+	12307554	12309043	4	Bivalent	Bivalent	none	Meth+/Exp+	Methylated
RP11-454P7.3	ENSG00000265015.1	chr18	15196998	15197774	-	15197650	15198309	3	none	none	H3K4me3	No Meth/Exp-	no change
NPC1	ENSG00000141458.8	chr18	21086148	21166862	-	21166158	21167066	7	H3K4me3	none	H3K4me3	No Meth/Exp-	no change
CHST9	ENSG00000154080.8	chr18	24495595	24765281	-	24764951	24765507	6	none	Bivalent	none	No Meth/Exp+	no change
RNF125	ENSG00000101695.4	chr18	29598335	29653176	+	29598566	29599460	5	Bivalent	Bivalent	H3K4me3	No Meth/Exp-	no change
PSTPIP2	ENSG00000152229.14	chr18	43563502	43652238	-	43651796	43652455	9	Bivalent	H3K4me3	none	No Meth/Exp+	no change
SKA1	ENSG00000154839.5	chr18	47901365	47920543	+	47901254	47901662	5	H3K4me3	H3K4me3	H3K4me3	No Meth/Exp+	no change
RP11-126O1.5	ENSG00000267226.1	chr18	56337712	56339109	-	56338211	56339277	10	H3K4me3	H3K4me3	H3K4me3	No Meth/Exp+	no change
RP11-17M16.1	ENSG00000220032.4	chr18	74207477	74210045	+	74206239	74208638	11	none	H3K4me3	none	Meth+/Exp+	Methylated
RP11-862L9.3	ENSG00000266844.1	chr18	74686646	74696118	+	74691262	74691466	3	none	none	none	Meth+/Exp-	Methylated
PPAP2C	ENSG00000141934.5	chr19	281040	291393	-	290594	292249	15	H3K27me3	Bivalent	none	Meth+/Exp-	Methylable
AC005329.7	ENSG00000248015.2	chr19	1392169	1396466	-	1395290	1395788	4	none	none	none	Meth+/Exp-	Methylated
AMH	ENSG00000104899.4	chr19	2249308	2252072	+	2250560	2253959	18	Bivalent	none	none	Meth+/Exp+	Methylated
GNG7	ENSG00000176533.8	chr19	2511217	2702707	-	2702532	2702987	8	Bivalent	none	H3K4me3	No Meth/Exp-	no change
TLE6	ENSG00000104953.14	chr19	2977444	2995177	+	2977241	2977471	7	Bivalent	none	none	No Meth/Exp+	no change
S1PR4	ENSG00000125910.4	chr19	3172344	3180329	+	3178741	3179986	8	none	none	none	No Meth/Exp+	no change
DOHH	ENSG00000129932.3	chr19	3490819	3500938	-	3500416	3500840	3	H3K4me3	H3K4me3	H3K4me3	No Meth/Exp-	no change
SHD	ENSG00000105251.6	chr19	4278598	4290721	+	4279042	4279809	2	Bivalent	H3K4me3	none	No Meth/Exp+	no change
PLIN5	ENSG00000214456.4	chr19	4522543	4535236	-	4535069	4535339	5	none	none	none	Meth+/Exp-	Methylated
TUBB4A	ENSG00000104833.6	chr19	6494330	6502859	-	6502090	6502411	4	Bivalent	Bivalent	H3K4me3	No Meth/Exp-	no change
CTD-2369P2.2	ENSG00000175898.4	chr19	10332111	10333870	-	10334618	10335511	5	none	none	none	No Meth/Exp+	no change
ICAM1	ENSG00000090339.4	chr19	10381511	10397291	+	10380287	10381965	11	Bivalent	H3K4me3	Bivalent	Meth+/Exp+	Methylable
ICAM3	ENSG00000076662.5	chr19	10444452	10450499	-	10443688	10446022	9	H3K4me3	H3K4me3	H3K4me3	Meth+/Exp+	Methylated
S1PR5	ENSG00000180739.12	chr19	10623623	10628607	-	10627980	10628417	2	Bivalent	Bivalent	Bivalent	No Meth/Exp-	no change
CDKN2D	ENSG00000129355.6	chr19	10677138	10679735	-	10679134	10680036	8	H3K4me3	H3K4me3	H3K4me3	No Meth/Exp-	no change
SPC24	ENSG00000161888.7	chr19	11242196	11266484	-	11266230	11266726	7	H3K4me3	H3K4me3	H3K4me3	No Meth/Exp+	no change
ACP5	ENSG00000102575.6	chr19	11685475	11689823	-	11689417	11689768	6	none	none	none	Meth+/Exp+	Methylated
SYCE2	ENSG00000161860.7	chr19	13009600	13030090	-	13029794	13030355	8	none	none	H3K4me3	Meth+/Exp+	Methylated
ASF1B	ENSG00000105011.4	chr19	14230321	14247768	-	14246899	14248520	12	H3K4me3	H3K4me3	H3K4me3	No Meth/Exp+	no change
EMR3	ENSG00000131355.10	chr19	14729929	14800839	-	14800835	14801167	2	H3K4me3	H3K4me3	H3K4me3	No Meth/Exp+	no change
F2RL3	ENSG00000127533.3	chr19	16999671	17003417	+	17000627	17001398	4	none	none	none	No Meth/Exp+	no change
CPAMD8	ENSG00000160111.8	chr19	17003758	17137625	-	17007101	17008857	7	none	none	none	Meth+/Exp-	Methylable
FCHO1	ENSG00000130475.10	chr19	17858527	17899377	+	17858371	17858891	5	none	H3K4me3	H3K4me3	No Meth/Exp-	no change
IFI30	ENSG00000216490.3	chr19	18283972	18288927	+	18284521	18285023	5	Bivalent	Bivalent	H3K4me3	No Meth/Exp+	no change
GDF15	ENSG00000130513.6	chr19	18485541	18499986	+	18497063	18497269	3	Bivalent	H3K4me3	none	No Meth/Exp+	no change
ZNF729	ENSG00000196350.7	chr19	22469210	22499978	+	22469367	22469687	2	none	none	none	No Meth/Exp+	no change
CTD-2291D10.4	ENSG00000267886.1	chr19	23258003	23283163	+	23257957	23258518	2	H3K4me3	H3K4me3	H3K4me3	No Meth/Exp+	no change
CTD-2540B15.9	ENSG00000267130.1	chr19	33795942	33800293	+	33792061	33794944	13	Bivalent	Bivalent	Bivalent	Meth+/Exp-	Methylated
FXYD1	ENSG00000266964.1	chr19	35629712	35634013	+	35632356	35632572	2	Bivalent	H3K27me3	H3K4me3	No Meth/Exp-	no change
MAG	ENSG00000105695.10	chr19	35783028	35804707	+	35800718	35801031	3	none	H3K27me3	none	Meth+/Exp-	Methylable
FFAR1	ENSG00000126266.2	chr19	35842445	35843367	+	35842430	35843187	7	none	H3K27me3	none	No Meth/Exp-	no change
COX7A1	ENSG00000161281.6	chr19	36641824	36643771	-	36642327	36643585	3	none	none	none	Meth+/Exp-	Methylable
PPP1R14A	ENSG00000167641.6	chr19	38741877	38747231	-	38746638	38747379	11	Bivalent	Bivalent	none	Meth+/Exp-	Methylated
FBXO27	ENSG00000161243.4	chr19	39481354	39523425	-	39522264	39523227	4	H3K4me3	Bivalent	H3K4me3	No Meth/Exp-	no change
PAPL	ENSG00000183760.6	chr19	39574553	39602133	+	39574700	39575137	7	Bivalent	H3K27me3	Bivalent	No Meth/Exp-	no change
PLEKHG2	ENSG00000090924.10	chr19	39903225	39919054	+	39903036	39904490	8	H3K4me3	H3K4me3	H3K4me3	No Meth/Exp+	no change
DLL3	ENSG00000090932.6	chr19	39989535	39999121	+	39989397	39990140	9	Bivalent	Bivalent	none	No Meth/Exp+	no change
LIPE	ENSG00000079435.5	chr19	42905659	42931578	-	42927285	42928598	6	Bivalent	H3K4me3	H3K4me3	No Meth/Exp-	no change
PLAUR	ENSG00000011422.7	chr19	44150247	44174699	-	44172916	44173252	3	none	none	H3K4me3	No Meth/Exp+	no change
EXOC3L2	ENSG00000130201.3	chr19	45715879	45737469	-	45737482	45738145	9	none	none	H3K27me3	Meth+/Exp+	Methylable
GPR4	ENSG00000177464.4	chr19	46093022	46105466	-	46105259	46105467	2	Bivalent	none	Bivalent	No Meth/Exp+	no change
PTGIR	ENSG00000160013.4	chr19	47123725	47128375	-	47126782	47127478	4	none	none	none	No Meth/Exp+	no change
ZNF541	ENSG00000118156.8	chr19	48023942	48059113	-	48047796	48049162	3	none	none	none	No Meth/Exp-	no change
SEPW1	ENSG00000178980.10	chr19	48281829	48287943	+	48281585	48282351	10	H3K4me3	H3K4me3	H3K4me3	No Meth/Exp-	no change
CTC-453G23.8	ENSG00000268583.1	chr19	48707340	48716411	+	48707169	48707461	3	H3K4me3	H3K4me3	H3K4me3	No Meth/Exp-	no change
CA11	ENSG00000063180.4	chr19	49141199	49149569	-	49140156	49141131	12	Bivalent	H3K4me3	H3K4me3	No Meth/Exp-	no change
PLEKHA4	ENSG00000105559.7	chr19	49340354	49371889	-	49340488	49340774	4	H3K4me3	H3K4me3	H3K4me3	No Meth/Exp+	no change
DHDH	ENSG00000104808.3	chr19	49436939	49448226	+	49436695	49437055	10	Bivalent	Bivalent	H3K4me3	No Meth/Exp-	no change
TEAD2	ENSG00000074219.9	chr19	49843852	49865714	-	49865341	49865690	3	H3K4me3	H3K4me3	Bivalent	No Meth/Exp+	no change
ASPDH	ENSG00000204653.5	chr19	51014857	51017947	-	51014318	51014873	4	H3K4me3	H3K4me3	H3K4me3	No Meth/Exp-	no change
CPXM1	ENSG00000088882.7	chr20	2774715	2781283	-	2780978	2781497	10	Bivalent	H3K4me3	H3K27me3	No Meth/Exp+	no change
FERMT1	ENSG00000101311.11	chr20	6055492	6104191	-	6103436	6103970	2	Bivalent	Bivalent	none	No Meth/Exp+	no change
BMP2	ENSG00000125845.6	chr20	6748311	6760927	+	6748052	6749546	5	Bivalent	Bivalent	H3K4me3	No Meth/Exp+	no change
BTBD3	ENSG00000132640.10	chr20	11871371	11907257	+	11871374	11872207	6	H3K4me3	none	H3K4me3	No Meth/Exp-	no change
ISM1	ENSG00000101230.5	chr20	13202418	13281298	+	13200670	13202616	32	Bivalent	Bivalent	Bivalent	Meth+/Exp+	Methylable
KIF16B	ENSG00000089177.13	chr20	16252749	16554078	-	16553836	16554260	9	H3K4me3	H3K4me3	H3K4me3	Meth+/Exp-	Methylated
THBD	ENSG00000178726.6	chr20	23026270	23030378	-	23028403	23032218	16	Bivalent	Bivalent	Bivalent	Meth+/Exp+	Methylated
SYNDIG1	ENSG00000101463.5	chr20	24449835	24647252	+	24449844	24452037	12	Bivalent	Bivalent	none	No Meth/Exp-	no change
COX4I2	ENSG00000131055.4	chr20	30225691	30232809	+	30225572	30225852	6	none	none	none	Meth+/Exp+	Methylated
TPX2	ENSG00000088325.11	chr20	30327074	30389608	+	30326913	30327430	5	H3K4me3	H3K4me3	H3K4me3	No Meth/Exp+	no change
FOXS1	ENSG00000179772.6	chr20	30432103	30433420	-	30432900	30433242	2	none	none	none	No Meth/Exp+	no change
RP5-1125A11.1	ENSG00000228265.1	chr20	32570858	32582163	-	32580799	32582502	8	H3K4me3	H3K4me3	H3K4me3	No Meth/Exp-	no change
TP53INP2	ENSG00000078804.8	chr20	33292094	33301243	+	33291815	33292568	9	Bivalent	none	H3K4me3	No Meth/Exp-	no change
GDF5	ENSG00000125965.4	chr20	34021145	34042568	-	34042854	34043585	7	H3K4me3	H3K4me3	H3K4me3	No Meth/Exp+	no change
EPB41L1	ENSG00000088367.16	chr20	34679426	34820721	+	34680003	34681001	4	Bivalent	H3K4me3	none	No Meth/Exp-	no change
MYL9	ENSG00000101335.5	chr20	35169887	35178228	+	35169189	35169540	3	none	none	none	No Meth/Exp+	no change
MYBL2	ENSG00000101057.11	chr20	42295754	42345136	+	42295399	42296320	6	H3K4me3	H3K4me3	none	Meth+/Exp+	Methylable
TP53TG5	ENSG00000124251.6	chr20	44002526	44036529	-	44034458	44035954	13	Bivalent	H3K4me3	H3K4me3	Meth+/Exp-	Methylable
DBNDD2	ENSG00000244274.3	chr20	44034697	44039250	+	44034458	44035954	13	Bivalent	H3K4me3	H3K4me3	Meth+/Exp-	Methylable
UBE2C	ENSG00000175063.12	chr20	44441215	44445596	+	44440946	44441655	16	H3K4me3	H3K4me3	H3K4me3	No Meth/Exp+	no change
SLC13A3	ENSG00000158296.9	chr20	45186463	45304714	-	45279781	45280169	2	Bivalent	none	H3K4me3	Meth+/Exp-	Methylated
TCFL5	ENSG00000101190.8	chr20	61472467	61493115	-	61492119	61493626	10	H3K4me3	H3K4me3	none	No Meth/Exp-	no change
RBM11	ENSG00000185272.9	chr21	15588451	15600693	+	15588439	15588908	4	none	Bivalent	H3K4me3	No Meth/Exp-	no change
C21orf91	ENSG00000154642.6	chr21	19161284	19191703	-	19191095	19191952	5	H3K4me3	H3K4me3	none	No Meth/Exp-	no change
ADAMTS5	ENSG00000154736.5	chr21	28290231	28338832	-	28337856	28340237	12	Bivalent	Bivalent	none	Meth+/Exp+	Methylated
GRIK1	ENSG00000171189.12	chr21	30909254	31312351	-	31311386	31312106	4	Bivalent	Bivalent	Bivalent	No Meth/Exp-	no change
SLC5A3	ENSG00000272962.1	chr21	35445870	35478561	+	35445087	35446013	8	none	H3K4me3	H3K4me3	Meth+/Exp+	Methylated
CBR1	ENSG00000159228.8	chr21	37442239	37445464	+	37442140	37442778	5	none	Bivalent	H3K4me3	Meth+/Exp-	Methylated
ERG	ENSG00000157554.14	chr21	39751949	40033704	-	40032243	40033665	4	Bivalent	none	none	Meth+/Exp+	Methylable
RIPK4	ENSG00000183421.7	chr21	43159529	43187266	-	43186280	43187436	5	Bivalent	none	H3K27me3	Meth+/Exp+	Methylated
HSF2BP	ENSG00000160207.4	chr21	44949072	45079374	-	45077671	45079821	14	H3K4me3	H3K4me3	H3K4me3	No Meth/Exp+	no change
PRODH	ENSG00000100033.12	chr22	18900294	18924066	-	18923470	18923840	2	none	none	H3K4me3	Meth+/Exp-	Methylated
CDC45	ENSG00000093009.5	chr22	19466982	19508135	+	19466308	19467811	15	H3K4me3	H3K4me3	H3K4me3	No Meth/Exp+	no change
CLDN5	ENSG00000184113.8	chr22	19510547	19515068	-	19510871	19512254	7	Bivalent	none	H3K27me3	Meth+/Exp+	Methylated
AC023490.1	ENSG00000206176.5	chr22	20378814	20380440	+	20377811	20380341	2	none	none	none	Meth+/Exp-	Methylated
AIFM3	ENSG00000183773.11	chr22	21319396	21335649	+	21319178	21319912	5	Bivalent	none	H3K27me3	No Meth/Exp-	no change
AC002472.11	ENSG00000226872.1	chr22	21385646	21398258	+	21386493	21387000	7	Bivalent	H3K27me3	none	Meth+/Exp+	Methylable
TMEM191C	ENSG00000206140.5	chr22	21820712	21825558	+	21821571	21824125	4	none	none	none	Meth+/Exp-	Methylated
YDJC	ENSG00000161179.9	chr22	21982378	21984353	-	21982786	21984484	9	H3K4me3	H3K4me3	H3K4me3	Meth+/Exp-	Methylable
RAB36	ENSG00000100228.8	chr22	23487513	23506537	+	23487368	23487970	7	none	H3K4me3	H3K4me3	Meth+/Exp-	Methylated
DERL3	ENSG00000099958.10	chr22	24176690	24181315	-	24180491	24181666	9	none	H3K4me3	H3K4me3	Meth+/Exp-	Methylated
POM121L9P	ENSG00000128262.4	chr22	24647796	24661493	+	24647367	24647600	3	none	none	none	Meth+/Exp+	Methylated
ASPHD2	ENSG00000128203.6	chr22	26825239	26840981	+	26824978	26825680	3	none	Bivalent	H3K4me3	No Meth/Exp-	no change
TIMP3	ENSG00000100234.11	chr22	33197687	33259030	+	33197380	33198267	4	Bivalent	Bivalent	none	No Meth/Exp+	no change
HMOX1	ENSG00000100292.12	chr22	35776354	35790207	+	35776988	35777221	3	none	none	H3K4me3	No Meth/Exp+	no change
CDC42EP1	ENSG00000128283.6	chr22	37956454	37965412	+	37956102	37957926	6	Bivalent	H3K4me3	Bivalent	No Meth/Exp-	no change
PICK1	ENSG00000100151.11	chr22	38452318	38471708	+	38453187	38453503	5	H3K4me3	H3K4me3	H3K4me3	Meth+/Exp-	Methylated
SLC16A8	ENSG00000100156.6	chr22	38474141	38480100	-	38476836	38478839	5	none	none	none	Meth+/Exp-	Methylated
CTA-228A9.3	ENSG00000272720.1	chr22	38486134	38487566	+	38484615	38485721	4	none	none	none	Meth+/Exp-	Methylable
KDELR3	ENSG00000100196.6	chr22	38864067	38879452	+	38863881	38864263	4	Bivalent	Bivalent	H3K4me3	No Meth/Exp+	no change
CENPM	ENSG00000100162.10	chr22	42334725	42343168	-	42342407	42343278	7	none	H3K4me3	H3K4me3	No Meth/Exp+	no change
SERHL2	ENSG00000183569.13	chr22	42949623	42970388	+	42949592	42950304	8	Bivalent	none	H3K4me3	Meth+/Exp-	Methylable
RNU12	ENSG00000270022.2	chr22	43011250	43011913	+	43010440	43011063	8	H3K4me3	H3K4me3	H3K4me3	No Meth/Exp+	no change
SCUBE1	ENSG00000159307.14	chr22	43593289	43739394	-	43738882	43740285	6	Bivalent	H3K27me3	H3K27me3	Meth+/Exp-	Methylated
PHF21B	ENSG00000056487.11	chr22	45277042	45405880	-	45403036	45406372	23	H3K4me3	none	H3K4me3	No Meth/Exp+	no change
GTSE1	ENSG00000075218.14	chr22	46692638	46726707	+	46692210	46693349	16	H3K4me3	H3K4me3	H3K4me3	No Meth/Exp+	no change
