# Supplementary material for: Transcriptional alterations in glioma result primarily from DNA methylation–independent mechanisms
Source: HighWire-hosted journal article supplement (doi:10.1101/gr.249219.119), 2019-09-18
Supplement: Supplemental_Table_S3.xlsx.xlsx [file Supplemental_Table_S3.xlsx.xlsx]

## Sheet: IDHwt
Supplemental_Table_S3.xlsx List of CGI/promoter-controlled genes in which expression alteration correlated with copy number changes in IDHwt glioma samples.
gene_name	gene_id	chr	start	end	strand	CpGi_Start	CpGi_End	CpGi_N_probes	Pval_cor_EXP_CNV
RP11-54O7.17	ENSG00000272512.1	chr1	931346	933431	-	933387	937410	21	0.00361237006469588
MMEL1	ENSG00000142606.11	chr1	2522078	2564481	-	2559892	2561055	6	0.0291152774191603
EPHA2	ENSG00000142627.9	chr1	16450832	16482582	-	16481484	16482782	9	0.0495023425986389
MFAP2	ENSG00000117122.9	chr1	17300997	17307330	-	17306551	17307363	3	0.0204100074359851
RAB42	ENSG00000188060.6	chr1	28918712	28921955	+	28919041	28919454	3	0.0479948235431212
ZC3H12A	ENSG00000163874.8	chr1	37940153	37949980	+	37939723	37940650	11	0.0413236969948491
RP11-230B22.1	ENSG00000235545.1	chr1	63154153	63176365	+	63153380	63154349	3	0.039344334551621
MUC1	ENSG00000185499.12	chr1	155158300	155162707	-	155163434	155163818	3	0.0186366587282258
PLCH1	ENSG00000114805.12	chr3	155093369	155462856	-	155461917	155462561	4	4.84315570161032e-07
AC124944.5	ENSG00000223783.1	chr3	195563064	195587275	-	195564747	195565017	3	0.0002561256730436
RP11-586D19.1	ENSG00000249896.1	chr4	6202460	6240044	+	6200912	6202724	10	0.0395815588998652
GPR78	ENSG00000155269.7	chr4	8560452	8621486	+	8582036	8583364	9	0.0382138880784977
IGFBP7	ENSG00000163453.7	chr4	57896939	57976551	-	57975860	57976916	9	0.020401743082629
FBN2	ENSG00000138829.6	chr5	127593601	127994878	-	127872563	127874945	11	0.0480310153226512
PXDC1	ENSG00000168994.9	chr6	3722848	3752260	-	3750788	3752767	8	0.023800413132788
RP11-420L9.5	ENSG00000270504.1	chr6	3751345	3754105	+	3750788	3752767	8	0.0205488336550125
HLA-C	ENSG00000204525.10	chr6	31236526	31239907	-	31238852	31240120	9	0.0284309241483355
LRP11	ENSG00000120256.5	chr6	150139934	150186199	-	150184344	150185505	8	0.000539990304227581
AC092171.2	ENSG00000188365.3	chr7	5459477	5462753	+	5458503	5469256	41	0.021340001924684
RAPGEF5	ENSG00000136237.14	chr7	22157856	22396763	-	22396039	22396852	5	0.0301485953478649
GPNMB	ENSG00000136235.11	chr7	23275586	23314727	+	23287221	23287508	3	0.0165102059652545
HOXA1	ENSG00000105991.7	chr7	27132612	27135615	-	27135342	27136736	11	0.00405563466746083
HOXA4	ENSG00000197576.9	chr7	27168126	27170418	-	27169572	27170638	10	0.0104042092308213
HOXA5	ENSG00000106004.4	chr7	27180671	27183287	-	27182613	27185562	52	0.00897943609940198
CHN2	ENSG00000106069.16	chr7	29161890	29553944	+	29233704	29235046	8	0.0184904571672623
C7orf41	ENSG00000180354.11	chr7	30174426	30202378	+	30174230	30176169	8	0.0172968672773068
ABCA13	ENSG00000179869.10	chr7	48211055	48687092	+	48494361	48494753	4	0.045387769897458
COBL	ENSG00000106078.13	chr7	51083909	51384515	-	51383311	51384938	11	0.015007006265412
EGFR	ENSG00000146648.11	chr7	55086714	55324313	+	55086141	55088105	7	0.000751997969982136
GNAI1	ENSG00000127955.11	chr7	79763271	79848718	+	79763793	79764889	7	0.0379512377528013
SEMA3C	ENSG00000075223.9	chr7	80371854	80551675	-	80548306	80548726	4	0.031301234212535
CACNA2D1	ENSG00000153956.11	chr7	81575760	82073114	-	82072021	82073520	8	0.0107578658825332
ABCB4	ENSG00000005471.11	chr7	87031013	87109751	-	87104723	87105305	6	0.0375441299121904
DBF4	ENSG00000006634.3	chr7	87505531	87538856	+	87505100	87506493	18	0.0179817191775907
AC002456.2	ENSG00000223969.1	chr7	90219933	90226667	-	90225082	90226364	7	0.00577726639730465
AC002451.3	ENSG00000231170.1	chr7	95225994	95243031	+	95225503	95226194	7	0.03578642326561
PCOLCE	ENSG00000106333.8	chr7	100199800	100205798	+	100201614	100203652	8	0.000110065804055313
RELN	ENSG00000189056.9	chr7	103112231	103629963	-	103629525	103630652	8	0.00341197571783724
NAMPT	ENSG00000105835.7	chr7	105888731	105926772	-	105924650	105925975	8	0.0396114944137643
LAMB1	ENSG00000091136.9	chr7	107564244	107643700	-	107641795	107644058	13	0.0308855479611406
MET	ENSG00000105976.10	chr7	116312444	116438440	+	116311824	116312598	6	0.0134880082855031
TMEM229A	ENSG00000234224.1	chr7	123670973	123673523	-	123672063	123673691	10	0.0161105705513327
RP5-921G16.1	ENSG00000242593.1	chr7	123672259	124035172	+	123672063	123673691	10	0.0277341413821308
hsa-mir-490	ENSG00000234352.5	chr7	136370306	136866854	-	136849054	136849346	4	0.0375740774688702
ZC3HAV1L	ENSG00000146858.7	chr7	138710452	138720775	-	138720044	138721019	10	0.00306761124503165
ZC3HAV1	ENSG00000105939.8	chr7	138728266	138794465	-	138793113	138794608	11	0.00775784460331766
EZH2	ENSG00000106462.6	chr7	148504475	148581413	-	148580495	148582061	6	0.0149774449676307
TMEM176B	ENSG00000106565.13	chr7	150488373	150498448	-	150496809	150498206	11	0.0115914154331554
C7orf13	ENSG00000244291.1	chr7	156431057	156433348	-	156432433	156433670	13	0.0289315542400044
RNF32	ENSG00000105982.12	chr7	156432975	156469824	+	156432433	156433670	13	0.0393400628541147
GS1-24F4.2	ENSG00000245857.2	chr8	6693076	6742798	+	6691833	6693135	9	0.0302906158052675
SEC61A2	ENSG00000065665.16	chr10	12171636	12211960	+	12171225	12172038	8	0.0109197986919506
OPTN	ENSG00000123240.12	chr10	13141449	13180291	+	13141778	13142493	10	0.0185799470560802
FAM171A1	ENSG00000148468.12	chr10	15253642	15413061	-	15412419	15413040	3	0.0102408132036877
STAM	ENSG00000136738.10	chr10	17686124	17757913	+	17686097	17686335	4	0.00697561092336408
SPAG6	ENSG00000077327.11	chr10	22634399	22743153	+	22634000	22634862	12	0.0102328099426673
RP11-297A16.2	ENSG00000230534.2	chr10	35386934	35415948	-	35415788	35416685	9	0.0151096520042826
ANKRD30A	ENSG00000148513.13	chr10	37414785	37673039	+	37414145	37414769	7	0.0181445260935985
ZNF488	ENSG00000165388.8	chr10	48355024	48373866	+	48354459	48355197	8	0.0100303467535272
GDF10	ENSG00000107623.4	chr10	48425815	48438976	-	48438411	48439320	6	0.032485589253552
PHYHIPL	ENSG00000165443.7	chr10	60936350	61007534	+	60935827	60937049	15	0.00268687808403257
ANK3	ENSG00000151150.16	chr10	61786056	62493248	-	62492785	62493376	3	0.0244093242025124
C10orf107	ENSG00000183346.6	chr10	63422719	63526524	+	63422538	63423105	8	0.0247560100312573
ZNF365	ENSG00000138311.11	chr10	64133951	64431771	+	64133789	64134420	9	0.0201393381516159
RUFY2	ENSG00000204130.8	chr10	70100864	70167051	-	70166206	70167342	11	0.0262414384519454
KIAA1279	ENSG00000198954.4	chr10	70748487	70776738	+	70748435	70749334	7	0.0111609322333471
NPFFR1	ENSG00000148734.7	chr10	72007085	72043432	-	72043446	72043886	3	0.00896020195187057
GRID1	ENSG00000182771.13	chr10	87359312	88126250	-	88122924	88127364	21	0.0328482777486086
RNLS	ENSG00000184719.7	chr10	90033621	90344287	-	90342528	90343221	9	0.00372752955297401
TBC1D12	ENSG00000108239.8	chr10	96162261	96295687	+	96162023	96163327	11	0.0458731303798683
TLL2	ENSG00000095587.8	chr10	98124363	98273675	-	98272207	98273939	11	0.0354632068611276
DUSP5	ENSG00000138166.5	chr10	112257596	112271302	+	112257163	112258684	12	0.0328949056712435
PLEKHA1	ENSG00000107679.10	chr10	124134212	124191867	+	124134088	124134933	2	0.0233756313143072
ACADSB	ENSG00000196177.8	chr10	124768495	124817827	+	124767758	124768897	12	0.00574205412564407
OAT	ENSG00000065154.7	chr10	126085872	126107545	-	126106818	126107862	9	0.0151249906901748
FAM53B	ENSG00000189319.9	chr10	126307861	126432838	-	126431314	126433285	11	0.0485863171258054
RP11-69M1.4	ENSG00000255581.1	chr12	8169797	8170456	-	8171336	8171790	3	0.00149465759233066
GABARAPL1	ENSG00000139112.6	chr12	10365057	10375727	+	10365369	10365721	6	7.19622318738934e-08
C1QL4	ENSG00000186897.3	chr12	49726200	49730971	-	49729728	49731162	6	0.0147228586211162
PEBP1	ENSG00000089220.4	chr12	118573663	118583389	+	118573730	118574731	11	0.0022810377445976
RP11-357K6.1	ENSG00000255618.1	chr12	119210837	119212942	-	119212110	119212393	4	0.00356701672030274
CCDC64	ENSG00000135127.7	chr12	120427673	120532298	+	120426547	120428066	8	1.09188701545122e-10
SYNE2	ENSG00000054654.11	chr14	64319683	64693165	+	64319622	64320526	4	0.0448143834313028
THBS1	ENSG00000137801.9	chr15	39873280	39891667	+	39872527	39873567	13	0.0016223584295862
EXD1	ENSG00000178997.7	chr15	41474923	41522941	-	41522828	41523732	14	0.0160798675243152
ANPEP	ENSG00000166825.9	chr15	90328120	90358633	-	90357402	90358573	5	0.000920996467910529
CDH15	ENSG00000129910.3	chr16	89238175	89261900	+	89237944	89238331	5	0.0147393086175064
TLE6	ENSG00000104953.14	chr19	2977444	2995177	+	2977241	2977471	7	0.0118469557825132
LRRC8E	ENSG00000171017.6	chr19	7953390	7966901	+	7953280	7953708	6	0.033130972863501
EXOC3L2	ENSG00000130201.3	chr19	45715879	45737469	-	45737482	45738145	9	0.0499450097752537
JAG1	ENSG00000101384.7	chr20	10618332	10654694	-	10652573	10655611	17	0.00963253556197488
ADAMTS5	ENSG00000154736.5	chr21	28290231	28338832	-	28337856	28340237	12	0.0245019400096525

## Sheet: IDHmut
Supplemental_Table_S3.xlsx List of CGI/promoter-controlled genes in which expression alteration correlated with copy number changes in IDHmut glioma samples.
gene_name	gene_id	chr	start	end	strand	CpGi_Start	CpGi_End	CpGi_N_probes	Pval_cor_EXP_CNV
U1	ENSG00000233421.3	chr1	16860381	16862144	-	16860873	16862296	5	0.0413257405387595
GNG12-AS1	ENSG00000232284.3	chr1	68297986	68668670	+	68298371	68299315	4	0.0436366645864876
MCOLN2	ENSG00000153898.8	chr1	85391268	85462796	-	85462585	85463435	7	8.90598084251858e-05
SP9	ENSG00000217236.1	chr2	175199674	175203220	+	175199463	175202639	16	6.46266687611511e-08
KIF1A	ENSG00000130294.10	chr2	241653181	241759725	-	241758141	241760783	10	0.00178404012956104
TIMP4	ENSG00000157150.4	chr3	12194551	12200851	-	12200183	12200532	3	0.0122193659814071
HTRA3	ENSG00000170801.5	chr4	8271492	8308838	+	8271214	8272091	7	0.036409340182117
KDR	ENSG00000128052.8	chr4	55944644	55991756	-	55991402	55992171	10	0.00988776243419649
OSMR	ENSG00000145623.8	chr5	38845960	38945698	+	38845502	38846476	5	0.00172946784908605
FBN2	ENSG00000138829.6	chr5	127593601	127994878	-	127872563	127874945	11	0.00377415517179891
AC093620.5	ENSG00000241269.1	chr7	5459458	5460398	+	5458503	5469256	41	0.0221722471773327
CEBPD	ENSG00000221869.4	chr8	48649471	48651648	-	48649766	48651653	9	0.00295027230270664
PLAU	ENSG00000122861.11	chr10	75668935	75677255	+	75670696	75671379	8	0.001621151917907
ACTA2	ENSG00000107796.8	chr10	90694831	90751147	-	90750293	90751108	6	0.00597318326473692
IFITM10	ENSG00000244242.1	chr11	1753640	1771821	-	1768979	1770712	13	0.0324824486763611
PARVA	ENSG00000197702.7	chr11	12398732	12552348	+	12398965	12399863	7	0.0212240596114039
MDK	ENSG00000110492.11	chr11	46402306	46405375	+	46402624	46404139	6	0.00691799333620505
RP11-727F15.9	ENSG00000256690.1	chr11	62599706	62601515	+	62598679	62600064	11	0.00278782836080565
PPP1R14B	ENSG00000173457.6	chr11	64011956	64014413	-	64013772	64015341	9	0.0388982679662907
KCNK7	ENSG00000173338.8	chr11	65360326	65363467	-	65359292	65360328	4	0.00371720301467339
TSKU	ENSG00000182704.6	chr11	76493295	76509198	+	76494416	76495672	4	0.0249926959437323
FAM181B	ENSG00000182103.3	chr11	82443053	82444906	-	82443435	82444976	7	0.000353959861056682
PRCP	ENSG00000137509.6	chr11	82534544	82681626	-	82612259	82612844	9	0.00580472359396007
C11orf82	ENSG00000165490.8	chr11	82611017	82669319	+	82612259	82612844	9	0.00358319580632598
RP11-839D17.3	ENSG00000255129.1	chr11	113149159	113185159	-	113185332	113185663	2	0.00177316702800575
TTC12	ENSG00000149292.12	chr11	113185251	113254266	+	113185332	113185663	2	0.0345362453471549
ANKK1	ENSG00000170209.4	chr11	113258513	113271140	+	113258443	113258821	3	0.0415159756759027
PVRL1	ENSG00000110400.6	chr11	119494120	119599794	-	119598382	119600157	9	0.0369378822849754
CHEK1	ENSG00000149554.8	chr11	125495036	125546150	+	125495233	125495866	4	0.0307943980433945
DLX3	ENSG00000064195.7	chr17	48067369	48072588	-	48070698	48072654	10	0.0105396237495217
NOG	ENSG00000183691.4	chr17	54671060	54672951	+	54670780	54672347	7	0.0260686295296542
BRIP1	ENSG00000136492.4	chr17	59758627	59940882	-	59940825	59941067	6	0.0330459721651824
CACNG4	ENSG00000075461.5	chr17	64961026	65029514	+	64961007	64962321	8	0.0166686332071654
BIRC5	ENSG00000089685.10	chr17	76210267	76221717	+	76210129	76210627	5	0.0095218908686425
GATA6	ENSG00000141448.4	chr18	19749404	19782491	+	19744936	19752363	19	0.0220307489560206
SKOR2	ENSG00000215474.2	chr18	44746293	44775554	-	44772992	44775577	8	3.12474514383537e-05
JOSD2	ENSG00000161677.7	chr19	51009255	51014610	-	51014318	51014873	4	0.0435746734404028
