# Supplementary material for: Transcriptional alterations in glioma result primarily from DNA methylation–independent mechanisms
Source: HighWire-hosted journal article supplement (doi:10.1101/gr.249219.119), 2019-09-18
Supplement: Supplemental_Table_S4.xlsx.xlsx [file Supplemental_Table_S4.xlsx.xlsx]

## Sheet: table4
Supplemental_Table_S4.xlsx : List of genes that are upregulated in IDHwt glioma samples and that are maintained repressed with a gain of methylation in IDHmut glioma samples.
gene_name	gene_id	chr	start	end	strand	CpGi_Start	CpGi_End	CpGi_N_probes	Chromatin_ES	Chromatin_NPC	Chromatin_Brain	Defect_IDHwt	Defect_IDHmut	Methylation_IDHmut_vs_ctrl
RP11-465B22.5	ENSG00000223823.1	chr1	1072397	1079436	+	1072369	1072847	3	none	H3K27me3	H3K27me3	No Meth/Exp+	NA	Methylable
GPR157	ENSG00000180758.10	chr1	9160364	9189229	-	9188503	9189743	13	Bivalent	H3K27me3	none	No Meth/Exp+	NA	Methylable
RP3-510D11.2	ENSG00000234546.2	chr1	9242263	9252148	+	9242167	9243827	7	Bivalent	Bivalent	none	No Meth/Exp+	NA	Methylated
TMEM51	ENSG00000171729.9	chr1	15479028	15546976	+	15479219	15481471	12	Bivalent	none	none	No Meth/Exp+	NA	Methylated
ARHGEF19	ENSG00000142632.12	chr1	16524349	16539104	-	16532917	16534580	10	H3K4me3	H3K4me3	none	No Meth/Exp+	NA	Methylated
MST1L	ENSG00000186715.6	chr1	17081405	17096732	-	17085411	17086974	6	none	none	none	Meth+/Exp+	NA	Methylated
RUNX3	ENSG00000020633.14	chr1	25226002	25291612	-	25255527	25259005	32	Bivalent	H3K27me3	H3K27me3	Meth+/Exp+	NA	Methylated
FAM46B	ENSG00000158246.7	chr1	27331511	27339327	-	27338879	27339441	5	H3K4me3	H3K4me3	none	No Meth/Exp+	NA	Methylated
FHL3	ENSG00000183386.5	chr1	38462442	38471278	-	38470617	38471396	4	H3K4me3	H3K4me3	none	No Meth/Exp+	NA	Methylated
LINC00466	ENSG00000224209.2	chr1	63655660	63782902	-	63782394	63790471	38	Bivalent	Bivalent	none	Meth+/Exp+	NA	Methylated
RP4-792G4.2	ENSG00000230798.1	chr1	63786555	63790112	-	63782394	63790471	38	Bivalent	Bivalent	none	Meth+/Exp+	NA	Methylated
FOXD3	ENSG00000187140.4	chr1	63788730	63790797	+	63782394	63790471	38	Bivalent	Bivalent	none	Meth+/Exp+	NA	Methylated
CYR61	ENSG00000142871.11	chr1	86046444	86049645	+	86046362	86047240	9	H3K4me3	H3K4me3	none	No Meth/Exp+	NA	Methylated
F3	ENSG00000117525.9	chr1	94994781	95007356	-	95006837	95008051	12	none	H3K4me3	H3K4me3	No Meth/Exp+	NA	Methylated
LINC01057	ENSG00000224081.3	chr1	95104017	95285837	-	95285602	95286319	7	Bivalent	none	H3K4me3	No Meth/Exp+	NA	Methylated
ALX3	ENSG00000156150.6	chr1	110602616	110613322	-	110610265	110613303	13	Bivalent	none	none	Meth+/Exp+	NA	Methylated
DENND2D	ENSG00000162777.12	chr1	111729796	111747157	-	111746337	111747303	8	none	H3K27me3	none	No Meth/Exp+	NA	Methylable
CD58	ENSG00000116815.11	chr1	117057157	117113661	-	117112960	117113883	6	none	none	H3K4me3	No Meth/Exp+	NA	Methylable
RP11-495P10.4	ENSG00000235988.1	chr1	147789799	147790129	-	147789652	147790094	3	Bivalent	H3K27me3	none	Meth+/Exp+	NA	Methylated
CCDC19	ENSG00000213085.5	chr1	159842154	159869953	-	159869901	159870143	6	none	H3K27me3	H3K27me3	Meth+/Exp+	NA	Methylated
TAGLN2	ENSG00000158710.10	chr1	159887897	159895522	-	159894329	159895398	7	none	H3K4me3	Bivalent	No Meth/Exp+	NA	Methylated
HSPA7	ENSG00000225217.1	chr1	161576081	161578007	+	161575534	161576908	5	H3K27me3	H3K27me3	none	Meth+/Exp+	NA	Methylated
KLHDC8A	ENSG00000162873.10	chr1	205305220	205326218	-	205312493	205313576	3	Bivalent	Bivalent	none	No Meth/Exp+	NA	Methylated
LEMD1	ENSG00000186007.5	chr1	205350506	205425082	-	205424829	205426556	12	none	Bivalent	none	No Meth/Exp+	NA	Methylated
G0S2	ENSG00000123689.5	chr1	209848765	209849733	+	209848443	209849428	7	Bivalent	none	H3K4me3	No Meth/Exp+	NA	Methylated
OSR1	ENSG00000143867.5	chr2	19551246	19558414	-	19555789	19558403	8	Bivalent	Bivalent	none	No Meth/Exp+	NA	Methylable
SDC1	ENSG00000115884.6	chr2	20400558	20425194	-	20423088	20425767	17	H3K4me3	none	H3K4me3	No Meth/Exp+	NA	Methylable
ANKRD53	ENSG00000144031.7	chr2	71205510	71212626	+	71205563	71206529	5	Bivalent	none	none	No Meth/Exp+	NA	Methylated
ITPRIPL1	ENSG00000198885.5	chr2	96991069	96994091	+	96990857	96991283	6	Bivalent	none	none	No Meth/Exp+	NA	Methylated
CNGA3	ENSG00000144191.7	chr2	98962618	99015064	+	98962873	98964187	9	Bivalent	H3K27me3	none	No Meth/Exp+	NA	Methylated
ACOXL	ENSG00000153093.14	chr2	111490150	111875799	+	111489977	111490884	3	Bivalent	H3K27me3	H3K27me3	Meth+/Exp+	NA	Methylable
RP11-19E11.1	ENSG00000258910.2	chr2	119591276	119592686	-	119592602	119593845	6	Bivalent	Bivalent	Bivalent	Meth+/Exp+	NA	Methylable
STEAP3	ENSG00000115107.15	chr2	119981384	120023228	+	119981079	119981818	7	Bivalent	none	none	No Meth/Exp+	NA	Methylable
GLI2	ENSG00000074047.16	chr2	121493199	121750229	+	121492857	121495234	15	H3K4me3	H3K4me3	Bivalent	No Meth/Exp+	NA	Methylable
GYPC	ENSG00000136732.10	chr2	127413509	127454246	+	127413696	127414171	3	none	H3K4me3	H3K4me3	No Meth/Exp+	NA	Methylable
LYPD1	ENSG00000150551.10	chr2	133402426	133429152	-	133426652	133428870	11	Bivalent	H3K4me3	none	No Meth/Exp+	NA	Methylable
MLTK	ENSG00000091436.12	chr2	173940163	174132738	+	173940414	173941271	7	none	none	H3K4me3	No Meth/Exp+	NA	Methylable
HOXD12	ENSG00000170178.5	chr2	176964458	176966408	+	176964062	176965509	10	Bivalent	none	none	Meth+/Exp+	NA	Methylated
HOXD9	ENSG00000128709.10	chr2	176987088	176989853	+	176986424	176988291	13	none	Bivalent	H3K27me3	Meth+/Exp+	NA	Methylable
HOXD8	ENSG00000175879.7	chr2	176994422	176997423	+	176993479	176995557	14	Bivalent	Bivalent	H3K27me3	Meth+/Exp+	NA	Methylable
CERKL	ENSG00000188452.9	chr2	182401403	182545392	-	182521221	182521927	9	Bivalent	Bivalent	Bivalent	No Meth/Exp+	NA	Methylable
MYO1B	ENSG00000128641.13	chr2	192109911	192290115	+	192109828	192110940	7	H3K4me3	H3K4me3	none	Meth+/Exp+	NA	Methylable
FZD7	ENSG00000155760.1	chr2	202899310	202903160	+	202897386	202901046	16	H3K4me3	H3K4me3	Bivalent	Meth+/Exp+	NA	Methylable
PAX3	ENSG00000135903.14	chr2	223064607	223163715	-	223162946	223163912	8	Bivalent	Bivalent	none	Meth+/Exp+	NA	Methylable
GBX2	ENSG00000168505.6	chr2	237073879	237077012	-	237071794	237078762	29	Bivalent	H3K4me3	H3K27me3	Meth+/Exp+	NA	Methylated
AC079135.1	ENSG00000233611.3	chr2	237076090	237203570	+	237071794	237078762	29	Bivalent	H3K4me3	H3K27me3	Meth+/Exp+	NA	Methylated
ACKR3	ENSG00000144476.5	chr2	237476430	237491001	+	237476311	237477263	5	Bivalent	none	none	No Meth/Exp+	NA	Methylated
STAC	ENSG00000144681.6	chr3	36421836	36589499	+	36421702	36422210	6	Bivalent	H3K27me3	none	No Meth/Exp+	NA	Methylated
MYD88	ENSG00000172936.8	chr3	38179969	38184513	+	38179857	38180689	10	none	Bivalent	H3K4me3	No Meth/Exp+	NA	Methylated
LTF	ENSG00000012223.8	chr3	46477136	46526724	-	46506161	46506416	4	none	none	H3K27me3	No Meth/Exp+	NA	Methylable
SEMA3F	ENSG00000001617.7	chr3	50192478	50226508	+	50191971	50193130	6	Bivalent	Bivalent	none	No Meth/Exp+	NA	Methylable
RP11-157F20.3	ENSG00000272202.1	chr3	57112971	57114129	+	57112567	57113908	6	Bivalent	Bivalent	none	No Meth/Exp+	NA	Methylated
FILIP1L	ENSG00000168386.14	chr3	99548985	99833357	-	99594969	99595215	3	Bivalent	H3K4me3	H3K4me3	No Meth/Exp+	NA	Methylable
C3orf72	ENSG00000206262.4	chr3	138666076	138672293	+	138663718	138666346	14	Bivalent	Bivalent	none	Meth+/Exp+	NA	Methylated
PLSCR2	ENSG00000163746.7	chr3	146109208	146213778	-	146187108	146187710	2	none	none	H3K4me3	No Meth/Exp+	NA	Methylable
AGTR1	ENSG00000144891.13	chr3	148415571	148460795	+	148415442	148415932	5	Bivalent	Bivalent	Bivalent	No Meth/Exp+	NA	Methylable
WWTR1	ENSG00000018408.10	chr3	149235022	149454501	-	149374709	149376300	16	H3K4me3	H3K4me3	Bivalent	No Meth/Exp+	NA	Methylated
WWTR1-AS1	ENSG00000241313.2	chr3	149374807	149379151	+	149374709	149376300	16	H3K4me3	H3K4me3	Bivalent	No Meth/Exp+	NA	Methylated
SHOX2	ENSG00000168779.15	chr3	157814948	157824292	-	157822973	157823836	6	Bivalent	Bivalent	none	No Meth/Exp+	NA	Methylable
STK32B	ENSG00000152953.8	chr4	5053169	5502725	+	5053230	5054092	6	Bivalent	Bivalent	none	No Meth/Exp+	NA	Methylated
EVC2	ENSG00000173040.8	chr4	5544499	5711275	-	5709985	5710495	8	Bivalent	none	Bivalent	No Meth/Exp+	NA	Methylable
NKX3-2	ENSG00000109705.7	chr4	13542454	13546674	-	13543562	13546494	17	Bivalent	Bivalent	H3K27me3	Meth+/Exp+	NA	Methylated
SLC34A2	ENSG00000157765.7	chr4	25656923	25680370	+	25657119	25657547	5	Bivalent	H3K27me3	H3K27me3	Meth+/Exp+	NA	Methylated
ZAR1	ENSG00000182223.7	chr4	48492269	48496406	+	48492117	48493589	10	Bivalent	none	none	Meth+/Exp+	NA	Methylated
PLAC8	ENSG00000145287.6	chr4	84011201	84058228	-	84030630	84031309	9	none	Bivalent	H3K4me3	No Meth/Exp+	NA	Methylable
NKX6-1	ENSG00000163623.5	chr4	85413140	85419603	-	85417659	85420799	18	Bivalent	Bivalent	Bivalent	Meth+/Exp+	NA	Methylated
CCDC109B	ENSG00000005059.11	chr4	110481361	110609874	+	110480827	110482060	9	none	H3K4me3	H3K4me3	No Meth/Exp+	NA	Methylated
CASP6	ENSG00000138794.5	chr4	110609785	110624739	-	110623959	110624831	7	H3K4me3	H3K4me3	H3K4me3	No Meth/Exp+	NA	Methylable
CTD-2127H9.1	ENSG00000249740.1	chr5	38736157	38845931	-	38845502	38846476	5	Bivalent	Bivalent	Bivalent	No Meth/Exp+	NA	Methylable
CTD-2384B11.2	ENSG00000225407.3	chr5	75987264	76012040	-	76011120	76012292	10	Bivalent	H3K4me3	none	No Meth/Exp+	NA	Methylable
ACOT12	ENSG00000172497.4	chr5	80625824	80689998	-	80689818	80690228	3	Bivalent	none	none	No Meth/Exp+	NA	Methylated
NKX2-5	ENSG00000183072.9	chr5	172659112	172662360	-	172661486	172662228	5	Bivalent	Bivalent	H3K27me3	No Meth/Exp+	NA	Methylable
MAK	ENSG00000111837.7	chr6	10762956	10838764	-	10838098	10838915	6	none	H3K4me3	H3K4me3	No Meth/Exp+	NA	Methylable
HIST1H4D	ENSG00000188987.2	chr6	26188938	26189304	-	26188997	26189295	3	H3K4me3	H3K4me3	H3K4me3	No Meth/Exp+	NA	Methylable
HIST1H4F	ENSG00000198327.3	chr6	26240561	26240976	+	26240697	26240951	3	none	none	Bivalent	Meth+/Exp+	NA	Methylable
HIST1H4I	ENSG00000198339.3	chr6	27107076	27108418	+	27107138	27107394	3	H3K4me3	H3K4me3	none	Meth+/Exp+	NA	Methylated
XXbac-BPG170G13.32	ENSG00000272236.1	chr6	29719742	29719984	-	29720381	29721101	36	Bivalent	Bivalent	H3K4me3	No Meth/Exp+	NA	Methylated
HLA-A	ENSG00000206503.7	chr6	29909037	29913661	+	29910202	29911367	9	none	Bivalent	H3K4me3	Meth+/Exp+	NA	Methylated
HLA-J	ENSG00000204622.6	chr6	29974360	29977733	+	29974220	29975369	38	Bivalent	none	none	Meth+/Exp+	NA	Methylated
HLA-B	ENSG00000234745.5	chr6	31321649	31324965	-	31323946	31325211	12	Bivalent	Bivalent	H3K4me3	Meth+/Exp+	NA	Methylated
DDAH2	ENSG00000213722.4	chr6	31694815	31698394	-	31695894	31698245	59	H3K4me3	H3K4me3	H3K4me3	Meth+/Exp+	NA	Methylated
TEAD3	ENSG00000007866.14	chr6	35441374	35464853	-	35464056	35466269	8	Bivalent	H3K4me3	none	Meth+/Exp+	NA	Methylated
FAM46A	ENSG00000112773.11	chr6	82201156	82462491	-	82461133	82463805	18	Bivalent	H3K4me3	none	No Meth/Exp+	NA	Methylated
AIM1	ENSG00000112297.10	chr6	106959730	107018326	+	106959764	106960985	5	Bivalent	none	Bivalent	No Meth/Exp+	NA	Methylable
ULBP1	ENSG00000111981.4	chr6	150285143	150294846	+	150284682	150286515	12	Bivalent	Bivalent	Bivalent	Meth+/Exp+	NA	Methylated
RAET1K	ENSG00000218358.2	chr6	150319155	150326293	-	150326011	150326802	10	Bivalent	none	none	No Meth/Exp+	NA	Methylated
ULBP3	ENSG00000131019.6	chr6	150384286	150390231	-	150389943	150390558	7	Bivalent	none	none	No Meth/Exp+	NA	Methylated
AL009178.1	ENSG00000269155.1	chr6	168196210	168198927	+	168197142	168198164	10	H3K27me3	none	none	No Meth/Exp+	NA	Methylated
TWIST1	ENSG00000122691.8	chr7	19060614	19157295	-	19156050	19158042	19	Bivalent	Bivalent	Bivalent	Meth+/Exp+	NA	Methylable
DNAH11	ENSG00000105877.13	chr7	21582833	21941457	+	21582443	21583313	8	Bivalent	Bivalent	none	No Meth/Exp+	NA	Methylable
IGF2BP3	ENSG00000136231.9	chr7	23349828	23510086	-	23508184	23509712	7	H3K4me3	H3K4me3	none	No Meth/Exp+	NA	Methylated
CTD-2227E11.1	ENSG00000270933.1	chr7	25988277	25989023	-	25990012	25991320	5	H3K4me3	Bivalent	Bivalent	No Meth/Exp+	NA	Methylable
HOXA2	ENSG00000105996.5	chr7	27139721	27142430	-	27143181	27143479	7	none	none	none	Meth+/Exp+	NA	Methylable
HOXA-AS4	ENSG00000253187.2	chr7	27208238	27211534	+	27208871	27209616	12	none	none	H3K27me3	Meth+/Exp+	NA	Methylated
HOXA13	ENSG00000106031.6	chr7	27233122	27239725	-	27238690	27240311	9	none	H3K4me3	H3K27me3	Meth+/Exp+	NA	Methylable
FKBP9	ENSG00000122642.6	chr7	32997017	33046543	+	32996732	32997591	8	Bivalent	Bivalent	H3K4me3	No Meth/Exp+	NA	Methylated
SFRP4	ENSG00000106483.7	chr7	37945543	38065297	-	37955622	37956555	8	Bivalent	Bivalent	none	No Meth/Exp+	NA	Methylated
AC002454.1	ENSG00000237819.1	chr7	92465797	92546501	+	92462201	92466387	31	Bivalent	H3K4me3	H3K4me3	No Meth/Exp+	NA	Methylable
TES	ENSG00000135269.13	chr7	115850547	115898837	+	115850370	115851028	6	Bivalent	none	Bivalent	Meth+/Exp+	NA	Methylable
CAV1	ENSG00000105974.7	chr7	116164839	116201233	+	116164703	116166735	23	none	Bivalent	Bivalent	No Meth/Exp+	NA	Methylated
LEP	ENSG00000174697.4	chr7	127881337	127897681	+	127880750	127881375	6	none	none	H3K27me3	Meth+/Exp+	NA	Methylated
PPP1R3B	ENSG00000173281.4	chr8	8993765	9009084	-	9008058	9009353	9	none	H3K4me3	none	No Meth/Exp+	NA	Methylable
SH2D4A	ENSG00000104611.7	chr8	19171128	19253729	+	19170999	19172056	5	Bivalent	none	none	No Meth/Exp+	NA	Methylated
RBPMS	ENSG00000157110.11	chr8	30241944	30429778	+	30241416	30242878	5	H3K4me3	H3K4me3	Bivalent	No Meth/Exp+	NA	Methylable
HTRA4	ENSG00000169495.4	chr8	38831683	38846181	+	38831592	38832353	5	Bivalent	none	none	Meth+/Exp+	NA	Methylated
IMPA1P	ENSG00000251521.2	chr8	82517804	82543369	-	82542798	82543475	6	Bivalent	none	none	No Meth/Exp+	NA	Methylated
CA3	ENSG00000164879.6	chr8	86285665	86361269	+	86350765	86351196	6	Bivalent	H3K27me3	H3K4me3	No Meth/Exp+	NA	Methylable
FBXO43	ENSG00000156509.9	chr8	101145588	101158028	-	101157647	101158215	3	none	none	H3K4me3	No Meth/Exp+	NA	Methylated
CTHRC1	ENSG00000164932.8	chr8	104383743	104395225	+	104383409	104384109	9	Bivalent	none	H3K4me3	Meth+/Exp+	NA	Methylated
CTD-3064M3.4	ENSG00000244998.1	chr8	142400039	142402674	-	142401533	142402494	4	none	none	none	No Meth/Exp+	NA	Methylable
PTP4A3	ENSG00000184489.7	chr8	142402093	142441620	+	142401533	142402494	4	none	none	none	No Meth/Exp+	NA	Methylable
RASEF	ENSG00000165105.9	chr9	85594500	85678092	-	85677015	85678321	5	Bivalent	H3K27me3	H3K27me3	Meth+/Exp+	NA	Methylable
BARX1	ENSG00000131668.9	chr9	96713905	96717654	-	96713326	96718186	14	Bivalent	none	Bivalent	Meth+/Exp+	NA	Methylable
C9orf171	ENSG00000188523.4	chr9	135285430	135448704	+	135285310	135285897	2	Bivalent	Bivalent	none	No Meth/Exp+	NA	Methylable
TOR4A	ENSG00000198113.2	chr9	140172201	140177093	+	140172613	140176105	10	Bivalent	none	none	Meth+/Exp+	NA	Methylated
VIM-AS1	ENSG00000229124.2	chr10	17256238	17271984	-	17270430	17272617	15	Bivalent	H3K4me3	Bivalent	No Meth/Exp+	NA	Methylated
SVIL	ENSG00000197321.10	chr10	29746267	30025710	-	30024072	30026077	12	Bivalent	none	none	Meth+/Exp+	NA	Methylable
COL13A1	ENSG00000197467.9	chr10	71561644	71724031	+	71561302	71562876	13	Bivalent	Bivalent	Bivalent	No Meth/Exp+	NA	Methylated
ADAM12	ENSG00000148848.10	chr10	127700950	128077024	-	128076155	128077482	12	Bivalent	Bivalent	H3K4me3	No Meth/Exp+	NA	Methylated
EBF3	ENSG00000108001.9	chr10	131633547	131762105	-	131761169	131771696	43	Bivalent	Bivalent	H3K27me3	Meth+/Exp+	NA	Methylated
VENTX	ENSG00000151650.7	chr10	135050908	135055433	+	135048797	135052077	41	Bivalent	H3K27me3	H3K27me3	Meth+/Exp+	NA	Methylated
MIR210HG	ENSG00000247095.2	chr11	565660	568457	-	567938	569461	7	none	Bivalent	H3K4me3	No Meth/Exp+	NA	Methylable
PHLDA2	ENSG00000181649.5	chr11	2949503	2950685	-	2949788	2951756	28	Bivalent	Bivalent	none	Meth+/Exp+	NA	Methylated
PRKCDBP	ENSG00000170955.9	chr11	6340176	6341877	-	6340445	6341909	12	none	H3K27me3	H3K4me3	Meth+/Exp+	NA	Methylated
LMO2	ENSG00000135363.7	chr11	33880122	33913836	-	33890357	33891495	6	Bivalent	Bivalent	H3K4me3	No Meth/Exp+	NA	Methylable
SLC43A3	ENSG00000134802.13	chr11	57174427	57195053	-	57194340	57194650	3	Bivalent	none	H3K4me3	No Meth/Exp+	NA	Methylated
EFEMP2	ENSG00000172638.8	chr11	65633912	65641063	-	65639835	65641374	10	none	H3K4me3	H3K4me3	No Meth/Exp+	NA	Methylated
RHOD	ENSG00000173156.2	chr11	66824289	66839484	+	66824118	66824621	7	Bivalent	none	none	Meth+/Exp+	NA	Methylated
TCIRG1	ENSG00000110719.5	chr11	67806483	67818362	+	67806251	67806611	7	H3K4me3	none	H3K4me3	No Meth/Exp+	NA	Methylated
ANO1	ENSG00000131620.13	chr11	69924408	70035634	+	69924338	69925197	5	none	H3K27me3	H3K27me3	Meth+/Exp+	NA	Methylable
P4HA3	ENSG00000149380.7	chr11	73946846	74022702	-	74022428	74022703	3	Bivalent	Bivalent	none	Meth+/Exp+	NA	Methylable
KCNE3	ENSG00000175538.6	chr11	74165886	74178774	-	74178175	74178801	7	Bivalent	H3K27me3	H3K4me3	No Meth/Exp+	NA	Methylated
POU2F3	ENSG00000137709.5	chr11	120107349	120190653	+	120110497	120110719	4	Bivalent	H3K27me3	H3K27me3	No Meth/Exp+	NA	Methylable
HOXC11	ENSG00000123388.4	chr12	54366910	54371427	+	54366815	54369103	13	none	none	H3K27me3	Meth+/Exp+	NA	Methylable
HOXC-AS3	ENSG00000251151.2	chr12	54375293	54379303	-	54378696	54380102	10	H3K27me3	none	none	No Meth/Exp+	NA	Methylated
HOXC10	ENSG00000180818.4	chr12	54378849	54384063	+	54378696	54380102	10	H3K27me3	none	none	No Meth/Exp+	NA	Methylated
HOXC-AS1	ENSG00000250451.1	chr12	54392806	54393794	-	54393374	54394648	17	none	none	H3K27me3	No Meth/Exp+	NA	Methylable
AC012531.25	ENSG00000260597.1	chr12	54413694	54416373	+	54412990	54413346	3	Bivalent	none	H3K27me3	Meth+/Exp+	NA	Methylated
AVPR1A	ENSG00000166148.2	chr12	63539014	63544722	-	63543636	63544967	5	Bivalent	Bivalent	Bivalent	Meth+/Exp+	NA	Methylable
SOCS2	ENSG00000120833.9	chr12	93963590	93977263	+	93963963	93967395	16	Bivalent	H3K4me3	Bivalent	No Meth/Exp+	NA	Methylable
GJA3	ENSG00000121743.3	chr13	20712394	20735188	-	20735043	20736157	12	Bivalent	Bivalent	Bivalent	Meth+/Exp+	NA	Methylated
FREM2	ENSG00000150893.9	chr13	39261266	39460074	+	39261236	39262299	6	Bivalent	H3K4me3	Bivalent	No Meth/Exp+	NA	Methylated
POU4F1	ENSG00000152192.6	chr13	79172497	79177673	-	79175610	79177985	15	Bivalent	Bivalent	Bivalent	Meth+/Exp+	NA	Methylable
RP11-298I3.4	ENSG00000258457.1	chr14	23451907	23468287	+	23449886	23452174	12	Bivalent	H3K4me3	Bivalent	No Meth/Exp+	NA	Methylated
POLE2	ENSG00000100479.8	chr14	50110273	50155140	-	50154754	50155239	8	H3K4me3	H3K4me3	H3K4me3	No Meth/Exp+	NA	Methylated
CDKN3	ENSG00000100526.15	chr14	54863567	54886936	+	54863423	54864254	12	H3K4me3	H3K4me3	H3K4me3	No Meth/Exp+	NA	Methylated
LGALS3	ENSG00000131981.11	chr14	55590828	55612126	+	55595697	55596692	7	Bivalent	none	none	No Meth/Exp+	NA	Methylated
ACTN1-AS1	ENSG00000259062.1	chr14	69446399	69454180	+	69444639	69446826	11	H3K4me3	none	H3K4me3	No Meth/Exp+	NA	Methylated
FBLN5	ENSG00000140092.10	chr14	92335756	92414331	-	92413581	92414324	6	Bivalent	Bivalent	H3K4me3	No Meth/Exp+	NA	Methylated
C15orf48	ENSG00000166920.6	chr15	45722727	45740959	+	45722561	45722939	6	none	H3K27me3	none	Meth+/Exp+	NA	Methylated
SQRDL	ENSG00000137767.9	chr15	45923346	45983492	+	45926877	45927758	9	Bivalent	Bivalent	none	No Meth/Exp+	NA	Methylable
ONECUT1	ENSG00000169856.7	chr15	53049637	53083273	-	53080458	53083699	11	Bivalent	Bivalent	none	Meth+/Exp+	NA	Methylated
WDR72	ENSG00000166415.10	chr15	53805938	54055075	-	54051655	54052004	3	Bivalent	H3K27me3	none	Meth+/Exp+	NA	Methylated
C2CD4A	ENSG00000198535.5	chr15	62359176	62363116	+	62359827	62360995	5	Bivalent	Bivalent	H3K4me3	No Meth/Exp+	NA	Methylated
KIAA0101	ENSG00000166803.6	chr15	64657193	64679886	-	64679907	64680233	3	H3K4me3	H3K4me3	H3K4me3	No Meth/Exp+	NA	Methylable
LOXL1	ENSG00000129038.11	chr15	74218330	74244478	+	74218696	74220373	16	none	none	none	No Meth/Exp+	NA	Methylated
ACAN	ENSG00000157766.11	chr15	89346674	89418585	+	89346043	89347203	6	Bivalent	Bivalent	H3K27me3	No Meth/Exp+	NA	Methylated
NR2F2	ENSG00000185551.8	chr15	96869167	96883492	+	96873408	96877721	28	Bivalent	H3K4me3	Bivalent	Meth+/Exp+	NA	Methylable
SOCS1	ENSG00000185338.4	chr16	11348262	11350036	-	11348541	11350803	20	H3K4me3	H3K4me3	H3K4me3	Meth+/Exp+	NA	Methylated
SCNN1B	ENSG00000168447.6	chr16	23289552	23392620	+	23313239	23313946	8	Bivalent	H3K27me3	none	No Meth/Exp+	NA	Methylable
IRX5	ENSG00000176842.10	chr16	54964774	54968397	+	54962422	54967805	25	Bivalent	H3K4me3	Bivalent	Meth+/Exp+	NA	Methylated
MT1A	ENSG00000205362.6	chr16	56672578	56673999	+	56671937	56672530	5	Bivalent	none	Bivalent	Meth+/Exp+	NA	Methylated
MT1H	ENSG00000205358.3	chr16	56703726	56705041	+	56703387	56703648	2	Bivalent	none	none	No Meth/Exp+	NA	Methylated
NLRC5	ENSG00000140853.11	chr16	57023397	57117443	+	57023190	57023768	10	Bivalent	Bivalent	H3K4me3	No Meth/Exp+	NA	Methylable
HIC1	ENSG00000177374.8	chr17	1957448	1962981	+	1952919	1962328	74	Bivalent	Bivalent	H3K4me3	No Meth/Exp+	NA	Methylated
FBXO39	ENSG00000177294.6	chr17	6679542	6700420	+	6679205	6679710	11	Bivalent	H3K27me3	none	No Meth/Exp+	NA	Methylated
RAB34	ENSG00000109113.13	chr17	27041299	27045447	-	27044168	27045049	7	H3K4me3	H3K4me3	none	No Meth/Exp+	NA	Methylated
FZD2	ENSG00000180340.5	chr17	42634925	42636907	+	42634829	42636851	7	Bivalent	H3K4me3	H3K4me3	Meth+/Exp+	NA	Methylated
SPATA32	ENSG00000184361.8	chr17	43331760	43339479	-	43339124	43339832	11	Bivalent	none	H3K4me3	No Meth/Exp+	NA	Methylable
HOXB2	ENSG00000173917.9	chr17	46618256	46623441	-	46620367	46621373	5	Bivalent	Bivalent	H3K27me3	Meth+/Exp+	NA	Methylable
HOXB-AS1	ENSG00000230148.4	chr17	46620913	46628610	+	46620367	46621373	5	Bivalent	Bivalent	H3K27me3	Meth+/Exp+	NA	Methylable
HOXB9	ENSG00000170689.8	chr17	46698518	46703839	-	46702280	46704166	10	Bivalent	none	H3K27me3	No Meth/Exp+	NA	Methylable
ACE	ENSG00000159640.10	chr17	61554422	61599205	+	61553834	61555063	10	Bivalent	Bivalent	none	No Meth/Exp+	NA	Methylated
FOXJ1	ENSG00000129654.7	chr17	74132414	74137380	-	74135922	74137802	10	Bivalent	H3K4me3	H3K27me3	No Meth/Exp+	NA	Methylated
SPHK1	ENSG00000176170.9	chr17	74372665	74383941	+	74378848	74382513	18	Bivalent	none	none	No Meth/Exp+	NA	Methylated
GALR1	ENSG00000166573.4	chr18	74962505	74980858	+	74961556	74963822	16	Bivalent	H3K27me3	Bivalent	No Meth/Exp+	NA	Methylable
RHPN2	ENSG00000131941.3	chr19	33469499	33555794	-	33555246	33556431	4	none	none	none	No Meth/Exp+	NA	Methylable
ETV2	ENSG00000105672.10	chr19	36132647	36135773	+	36134153	36135781	5	H3K4me3	H3K4me3	H3K4me3	No Meth/Exp+	NA	Methylable
RP11-103J8.1	ENSG00000270792.1	chr20	10653576	10975572	+	10652573	10655611	17	Bivalent	H3K4me3	H3K4me3	No Meth/Exp+	NA	Methylated
FER1L4	ENSG00000088340.11	chr20	34146507	34195484	-	34188719	34190267	4	Bivalent	Bivalent	none	No Meth/Exp+	NA	Methylated
TGIF2	ENSG00000118707.5	chr20	35201891	35222353	+	35201323	35203490	8	H3K4me3	H3K4me3	none	No Meth/Exp+	NA	Methylated
TGM2	ENSG00000198959.7	chr20	36756863	36794980	-	36793549	36793867	9	none	none	H3K4me3	No Meth/Exp+	NA	Methylable
FAM83D	ENSG00000101447.9	chr20	37554955	37581703	+	37554754	37555835	11	H3K4me3	H3K4me3	H3K4me3	No Meth/Exp+	NA	Methylable
SLC2A10	ENSG00000197496.4	chr20	45338126	45364965	+	45338071	45338663	6	none	none	none	No Meth/Exp+	NA	Methylated
SALL4	ENSG00000101115.8	chr20	50400581	50419059	-	50417312	50419045	5	H3K4me3	H3K4me3	none	Meth+/Exp+	NA	Methylated
MIR155HG	ENSG00000234883.2	chr21	26934221	26947480	+	26934423	26934805	4	Bivalent	none	H3K4me3	No Meth/Exp+	NA	Methylated
CARD10	ENSG00000100065.10	chr22	37886400	37915549	-	37914768	37915883	9	Bivalent	none	none	No Meth/Exp+	NA	Methylated
FAM109B	ENSG00000177096.4	chr22	42470255	42475445	+	42470035	42470669	3	none	none	none	No Meth/Exp+	NA	Methylated
ADM2	ENSG00000128165.7	chr22	50919985	50924869	+	50919453	50920376	10	none	Bivalent	H3K27me3	Meth+/Exp+	NA	Methylable
TYMP	ENSG00000025708.8	chr22	50964181	50968485	-	50963608	50970768	29	Bivalent	Bivalent	H3K4me3	Meth+/Exp+	NA	Methylated
ODF3B	ENSG00000177989.9	chr22	50968139	50971009	-	50963608	50970768	29	Bivalent	Bivalent	H3K4me3	Meth+/Exp+	NA	Methylated
