# Supplementary material for: Transcriptional alterations in glioma result primarily from DNA methylation–independent mechanisms
Source: HighWire-hosted journal article supplement (doi:10.1101/gr.249219.119), 2019-09-18
Supplement: Supplemental_Table_S5.xlsx.xlsx [file Supplemental_Table_S5.xlsx.xlsx]

## Sheet: Table S5
Supplemental_Table_S5.xlsx : TCGA ID of the samples (135 IDHwt and 415 IDHmut) used in the validation cohort.
Case ID	Sample
TCGA.06.0680.11A	ctrl_expression
TCGA.06.0678.11A	ctrl_expression
TCGA.06.0681.11A	ctrl_expression
TCGA.06.AABW.11A	ctrl_expression
TCGA.06.0675.11A	ctrl_expression
TCGA.06.AABW.11A	ctrl_methylation
TCGA.74.6573.11A	ctrl_methylation
TCGA.06.5417	IDH_mut_expression_&_methylation
TCGA.15.1444	IDH_mut_expression_&_methylation
TCGA.26.1442	IDH_mut_expression_&_methylation
TCGA.CS.4938	IDH_mut_expression_&_methylation
TCGA.CS.4942	IDH_mut_expression_&_methylation
TCGA.CS.4943	IDH_mut_expression_&_methylation
TCGA.CS.4944	IDH_mut_expression_&_methylation
TCGA.CS.5390	IDH_mut_expression_&_methylation
TCGA.CS.5393	IDH_mut_expression_&_methylation
TCGA.CS.5394	IDH_mut_expression_&_methylation
TCGA.CS.5396	IDH_mut_expression_&_methylation
TCGA.CS.6290	IDH_mut_expression_&_methylation
TCGA.CS.6666	IDH_mut_expression_&_methylation
TCGA.CS.6667	IDH_mut_expression_&_methylation
TCGA.CS.6668	IDH_mut_expression_&_methylation
TCGA.CS.6670	IDH_mut_expression_&_methylation
TCGA.DB.5270	IDH_mut_expression_&_methylation
TCGA.DB.5273	IDH_mut_expression_&_methylation
TCGA.DB.5274	IDH_mut_expression_&_methylation
TCGA.DB.5275	IDH_mut_expression_&_methylation
TCGA.DB.5277	IDH_mut_expression_&_methylation
TCGA.DB.5278	IDH_mut_expression_&_methylation
TCGA.DB.5279	IDH_mut_expression_&_methylation
TCGA.DB.5280	IDH_mut_expression_&_methylation
TCGA.DB.5281	IDH_mut_expression_&_methylation
TCGA.DB.A4X9	IDH_mut_expression_&_methylation
TCGA.DB.A4XA	IDH_mut_expression_&_methylation
TCGA.DB.A4XB	IDH_mut_expression_&_methylation
TCGA.DB.A4XC	IDH_mut_expression_&_methylation
TCGA.DB.A4XD	IDH_mut_expression_&_methylation
TCGA.DB.A4XE	IDH_mut_expression_&_methylation
TCGA.DB.A4XF	IDH_mut_expression_&_methylation
TCGA.DB.A4XG	IDH_mut_expression_&_methylation
TCGA.DB.A4XH	IDH_mut_expression_&_methylation
TCGA.DB.A64L	IDH_mut_expression_&_methylation
TCGA.DB.A64P	IDH_mut_expression_&_methylation
TCGA.DB.A64Q	IDH_mut_expression_&_methylation
TCGA.DB.A64R	IDH_mut_expression_&_methylation
TCGA.DB.A64S	IDH_mut_expression_&_methylation
TCGA.DB.A64U	IDH_mut_expression_&_methylation
TCGA.DB.A64V	IDH_mut_expression_&_methylation
TCGA.DB.A64W	IDH_mut_expression_&_methylation
TCGA.DB.A64X	IDH_mut_expression_&_methylation
TCGA.DB.A75K	IDH_mut_expression_&_methylation
TCGA.DB.A75L	IDH_mut_expression_&_methylation
TCGA.DB.A75M	IDH_mut_expression_&_methylation
TCGA.DB.A75O	IDH_mut_expression_&_methylation
TCGA.DH.5141	IDH_mut_expression_&_methylation
TCGA.DH.5142	IDH_mut_expression_&_methylation
TCGA.DH.5143	IDH_mut_expression_&_methylation
TCGA.DH.5144	IDH_mut_expression_&_methylation
TCGA.DH.A669	IDH_mut_expression_&_methylation
TCGA.DH.A66B	IDH_mut_expression_&_methylation
TCGA.DH.A66D	IDH_mut_expression_&_methylation
TCGA.DH.A66F	IDH_mut_expression_&_methylation
TCGA.DH.A7UR	IDH_mut_expression_&_methylation
TCGA.DH.A7US	IDH_mut_expression_&_methylation
TCGA.DH.A7UT	IDH_mut_expression_&_methylation
TCGA.DH.A7UU	IDH_mut_expression_&_methylation
TCGA.DH.A7UV	IDH_mut_expression_&_methylation
TCGA.DU.5849	IDH_mut_expression_&_methylation
TCGA.DU.5853	IDH_mut_expression_&_methylation
TCGA.DU.5855	IDH_mut_expression_&_methylation
TCGA.DU.5870	IDH_mut_expression_&_methylation
TCGA.DU.5871	IDH_mut_expression_&_methylation
TCGA.DU.5872	IDH_mut_expression_&_methylation
TCGA.DU.5874	IDH_mut_expression_&_methylation
TCGA.DU.6393	IDH_mut_expression_&_methylation
TCGA.DU.6394	IDH_mut_expression_&_methylation
TCGA.DU.6395	IDH_mut_expression_&_methylation
TCGA.DU.6396	IDH_mut_expression_&_methylation
TCGA.DU.6397	IDH_mut_expression_&_methylation
TCGA.DU.6399	IDH_mut_expression_&_methylation
TCGA.DU.6400	IDH_mut_expression_&_methylation
TCGA.DU.6401	IDH_mut_expression_&_methylation
TCGA.DU.6407	IDH_mut_expression_&_methylation
TCGA.DU.6408	IDH_mut_expression_&_methylation
TCGA.DU.6410	IDH_mut_expression_&_methylation
TCGA.DU.6542	IDH_mut_expression_&_methylation
TCGA.DU.7007	IDH_mut_expression_&_methylation
TCGA.DU.7008	IDH_mut_expression_&_methylation
TCGA.DU.7009	IDH_mut_expression_&_methylation
TCGA.DU.7010	IDH_mut_expression_&_methylation
TCGA.DU.7011	IDH_mut_expression_&_methylation
TCGA.DU.7015	IDH_mut_expression_&_methylation
TCGA.DU.7018	IDH_mut_expression_&_methylation
TCGA.DU.7019	IDH_mut_expression_&_methylation
TCGA.DU.7294	IDH_mut_expression_&_methylation
TCGA.DU.7298	IDH_mut_expression_&_methylation
TCGA.DU.7299	IDH_mut_expression_&_methylation
TCGA.DU.7300	IDH_mut_expression_&_methylation
TCGA.DU.7301	IDH_mut_expression_&_methylation
TCGA.DU.7302	IDH_mut_expression_&_methylation
TCGA.DU.7304	IDH_mut_expression_&_methylation
TCGA.DU.7306	IDH_mut_expression_&_methylation
TCGA.DU.7309	IDH_mut_expression_&_methylation
TCGA.DU.8163	IDH_mut_expression_&_methylation
TCGA.DU.8164	IDH_mut_expression_&_methylation
TCGA.DU.8166	IDH_mut_expression_&_methylation
TCGA.DU.8167	IDH_mut_expression_&_methylation
TCGA.DU.8168	IDH_mut_expression_&_methylation
TCGA.DU.A5TP	IDH_mut_expression_&_methylation
TCGA.DU.A5TR	IDH_mut_expression_&_methylation
TCGA.DU.A5TS	IDH_mut_expression_&_methylation
TCGA.DU.A5TU	IDH_mut_expression_&_methylation
TCGA.DU.A5TW	IDH_mut_expression_&_methylation
TCGA.DU.A6S2	IDH_mut_expression_&_methylation
TCGA.DU.A6S3	IDH_mut_expression_&_methylation
TCGA.DU.A6S6	IDH_mut_expression_&_methylation
TCGA.DU.A6S7	IDH_mut_expression_&_methylation
TCGA.DU.A6S8	IDH_mut_expression_&_methylation
TCGA.DU.A76O	IDH_mut_expression_&_methylation
TCGA.DU.A76R	IDH_mut_expression_&_methylation
TCGA.DU.A7T6	IDH_mut_expression_&_methylation
TCGA.DU.A7T8	IDH_mut_expression_&_methylation
TCGA.DU.A7TA	IDH_mut_expression_&_methylation
TCGA.DU.A7TC	IDH_mut_expression_&_methylation
TCGA.DU.A7TG	IDH_mut_expression_&_methylation
TCGA.E1.5302	IDH_mut_expression_&_methylation
TCGA.E1.5303	IDH_mut_expression_&_methylation
TCGA.E1.5304	IDH_mut_expression_&_methylation
TCGA.E1.5305	IDH_mut_expression_&_methylation
TCGA.E1.5307	IDH_mut_expression_&_methylation
TCGA.E1.5311	IDH_mut_expression_&_methylation
TCGA.E1.5318	IDH_mut_expression_&_methylation
TCGA.E1.5319	IDH_mut_expression_&_methylation
TCGA.E1.5322	IDH_mut_expression_&_methylation
TCGA.E1.A7YE	IDH_mut_expression_&_methylation
TCGA.E1.A7YH	IDH_mut_expression_&_methylation
TCGA.E1.A7YI	IDH_mut_expression_&_methylation
TCGA.E1.A7YK	IDH_mut_expression_&_methylation
TCGA.E1.A7YO	IDH_mut_expression_&_methylation
TCGA.E1.A7YS	IDH_mut_expression_&_methylation
TCGA.E1.A7YU	IDH_mut_expression_&_methylation
TCGA.E1.A7YV	IDH_mut_expression_&_methylation
TCGA.E1.A7YW	IDH_mut_expression_&_methylation
TCGA.E1.A7YY	IDH_mut_expression_&_methylation
TCGA.E1.A7Z3	IDH_mut_expression_&_methylation
TCGA.E1.A7Z4	IDH_mut_expression_&_methylation
TCGA.E1.A7Z6	IDH_mut_expression_&_methylation
TCGA.EZ.7264	IDH_mut_expression_&_methylation
TCGA.F6.A8O3	IDH_mut_expression_&_methylation
TCGA.F6.A8O4	IDH_mut_expression_&_methylation
TCGA.FG.5962	IDH_mut_expression_&_methylation
TCGA.FG.5964	IDH_mut_expression_&_methylation
TCGA.FG.5965	IDH_mut_expression_&_methylation
TCGA.FG.6689	IDH_mut_expression_&_methylation
TCGA.FG.6690	IDH_mut_expression_&_methylation
TCGA.FG.6691	IDH_mut_expression_&_methylation
TCGA.FG.7634	IDH_mut_expression_&_methylation
TCGA.FG.7636	IDH_mut_expression_&_methylation
TCGA.FG.7637	IDH_mut_expression_&_methylation
TCGA.FG.7638	IDH_mut_expression_&_methylation
TCGA.FG.7641	IDH_mut_expression_&_methylation
TCGA.FG.8182	IDH_mut_expression_&_methylation
TCGA.FG.8185	IDH_mut_expression_&_methylation
TCGA.FG.8186	IDH_mut_expression_&_methylation
TCGA.FG.8187	IDH_mut_expression_&_methylation
TCGA.FG.8188	IDH_mut_expression_&_methylation
TCGA.FG.8189	IDH_mut_expression_&_methylation
TCGA.FG.8191	IDH_mut_expression_&_methylation
TCGA.FG.A4MT	IDH_mut_expression_&_methylation
TCGA.FG.A4MX	IDH_mut_expression_&_methylation
TCGA.FG.A4MY	IDH_mut_expression_&_methylation
TCGA.FG.A60J	IDH_mut_expression_&_methylation
TCGA.FG.A60K	IDH_mut_expression_&_methylation
TCGA.FG.A60L	IDH_mut_expression_&_methylation
TCGA.FG.A6IZ	IDH_mut_expression_&_methylation
TCGA.FG.A6J1	IDH_mut_expression_&_methylation
TCGA.FG.A6J3	IDH_mut_expression_&_methylation
TCGA.FG.A70Y	IDH_mut_expression_&_methylation
TCGA.FG.A710	IDH_mut_expression_&_methylation
TCGA.FG.A711	IDH_mut_expression_&_methylation
TCGA.FG.A713	IDH_mut_expression_&_methylation
TCGA.FG.A87N	IDH_mut_expression_&_methylation
TCGA.FN.7833	IDH_mut_expression_&_methylation
TCGA.HT.7467	IDH_mut_expression_&_methylation
TCGA.HT.7468	IDH_mut_expression_&_methylation
TCGA.HT.7470	IDH_mut_expression_&_methylation
TCGA.HT.7471	IDH_mut_expression_&_methylation
TCGA.HT.7472	IDH_mut_expression_&_methylation
TCGA.HT.7473	IDH_mut_expression_&_methylation
TCGA.HT.7474	IDH_mut_expression_&_methylation
TCGA.HT.7475	IDH_mut_expression_&_methylation
TCGA.HT.7476	IDH_mut_expression_&_methylation
TCGA.HT.7477	IDH_mut_expression_&_methylation
TCGA.HT.7478	IDH_mut_expression_&_methylation
TCGA.HT.7479	IDH_mut_expression_&_methylation
TCGA.HT.7480	IDH_mut_expression_&_methylation
TCGA.HT.7481	IDH_mut_expression_&_methylation
TCGA.HT.7482	IDH_mut_expression_&_methylation
TCGA.HT.7483	IDH_mut_expression_&_methylation
TCGA.HT.7485	IDH_mut_expression_&_methylation
TCGA.HT.7601	IDH_mut_expression_&_methylation
TCGA.HT.7602	IDH_mut_expression_&_methylation
TCGA.HT.7603	IDH_mut_expression_&_methylation
TCGA.HT.7604	IDH_mut_expression_&_methylation
TCGA.HT.7605	IDH_mut_expression_&_methylation
TCGA.HT.7606	IDH_mut_expression_&_methylation
TCGA.HT.7607	IDH_mut_expression_&_methylation
TCGA.HT.7608	IDH_mut_expression_&_methylation
TCGA.HT.7609	IDH_mut_expression_&_methylation
TCGA.HT.7610	IDH_mut_expression_&_methylation
TCGA.HT.7611	IDH_mut_expression_&_methylation
TCGA.HT.7616	IDH_mut_expression_&_methylation
TCGA.HT.7620	IDH_mut_expression_&_methylation
TCGA.HT.7676	IDH_mut_expression_&_methylation
TCGA.HT.7677	IDH_mut_expression_&_methylation
TCGA.HT.7681	IDH_mut_expression_&_methylation
TCGA.HT.7684	IDH_mut_expression_&_methylation
TCGA.HT.7686	IDH_mut_expression_&_methylation
TCGA.HT.7687	IDH_mut_expression_&_methylation
TCGA.HT.7688	IDH_mut_expression_&_methylation
TCGA.HT.7689	IDH_mut_expression_&_methylation
TCGA.HT.7690	IDH_mut_expression_&_methylation
TCGA.HT.7692	IDH_mut_expression_&_methylation
TCGA.HT.7693	IDH_mut_expression_&_methylation
TCGA.HT.7694	IDH_mut_expression_&_methylation
TCGA.HT.7695	IDH_mut_expression_&_methylation
TCGA.HT.7855	IDH_mut_expression_&_methylation
TCGA.HT.7856	IDH_mut_expression_&_methylation
TCGA.HT.7858	IDH_mut_expression_&_methylation
TCGA.HT.7873	IDH_mut_expression_&_methylation
TCGA.HT.7874	IDH_mut_expression_&_methylation
TCGA.HT.7875	IDH_mut_expression_&_methylation
TCGA.HT.7877	IDH_mut_expression_&_methylation
TCGA.HT.7879	IDH_mut_expression_&_methylation
TCGA.HT.7880	IDH_mut_expression_&_methylation
TCGA.HT.7881	IDH_mut_expression_&_methylation
TCGA.HT.7884	IDH_mut_expression_&_methylation
TCGA.HT.7902	IDH_mut_expression_&_methylation
TCGA.HT.8010	IDH_mut_expression_&_methylation
TCGA.HT.8012	IDH_mut_expression_&_methylation
TCGA.HT.8013	IDH_mut_expression_&_methylation
TCGA.HT.8018	IDH_mut_expression_&_methylation
TCGA.HT.8105	IDH_mut_expression_&_methylation
TCGA.HT.8108	IDH_mut_expression_&_methylation
TCGA.HT.8109	IDH_mut_expression_&_methylation
TCGA.HT.8111	IDH_mut_expression_&_methylation
TCGA.HT.8113	IDH_mut_expression_&_methylation
TCGA.HT.8114	IDH_mut_expression_&_methylation
TCGA.HT.8563	IDH_mut_expression_&_methylation
TCGA.HT.A4DV	IDH_mut_expression_&_methylation
TCGA.HT.A5R5	IDH_mut_expression_&_methylation
TCGA.HT.A5R7	IDH_mut_expression_&_methylation
TCGA.HT.A5R9	IDH_mut_expression_&_methylation
TCGA.HT.A5RB	IDH_mut_expression_&_methylation
TCGA.HT.A614	IDH_mut_expression_&_methylation
TCGA.HT.A615	IDH_mut_expression_&_methylation
TCGA.HT.A616	IDH_mut_expression_&_methylation
TCGA.HT.A618	IDH_mut_expression_&_methylation
TCGA.HT.A619	IDH_mut_expression_&_methylation
TCGA.HT.A61B	IDH_mut_expression_&_methylation
TCGA.HT.A74J	IDH_mut_expression_&_methylation
TCGA.HT.A74K	IDH_mut_expression_&_methylation
TCGA.HT.A74L	IDH_mut_expression_&_methylation
TCGA.HT.A74O	IDH_mut_expression_&_methylation
TCGA.HW.7486	IDH_mut_expression_&_methylation
TCGA.HW.7487	IDH_mut_expression_&_methylation
TCGA.HW.7489	IDH_mut_expression_&_methylation
TCGA.HW.7490	IDH_mut_expression_&_methylation
TCGA.HW.7491	IDH_mut_expression_&_methylation
TCGA.HW.7495	IDH_mut_expression_&_methylation
TCGA.HW.8319	IDH_mut_expression_&_methylation
TCGA.HW.8320	IDH_mut_expression_&_methylation
TCGA.HW.8321	IDH_mut_expression_&_methylation
TCGA.HW.8322	IDH_mut_expression_&_methylation
TCGA.HW.A5KJ	IDH_mut_expression_&_methylation
TCGA.HW.A5KL	IDH_mut_expression_&_methylation
TCGA.HW.A5KM	IDH_mut_expression_&_methylation
TCGA.IK.7675	IDH_mut_expression_&_methylation
TCGA.IK.8125	IDH_mut_expression_&_methylation
TCGA.KT.A74X	IDH_mut_expression_&_methylation
TCGA.P5.A5ET	IDH_mut_expression_&_methylation
TCGA.P5.A5EU	IDH_mut_expression_&_methylation
TCGA.P5.A5EV	IDH_mut_expression_&_methylation
TCGA.P5.A5EW	IDH_mut_expression_&_methylation
TCGA.P5.A5EX	IDH_mut_expression_&_methylation
TCGA.P5.A5EZ	IDH_mut_expression_&_methylation
TCGA.P5.A5F0	IDH_mut_expression_&_methylation
TCGA.P5.A5F1	IDH_mut_expression_&_methylation
TCGA.P5.A5F2	IDH_mut_expression_&_methylation
TCGA.P5.A5F4	IDH_mut_expression_&_methylation
TCGA.P5.A72W	IDH_mut_expression_&_methylation
TCGA.P5.A72X	IDH_mut_expression_&_methylation
TCGA.P5.A72Z	IDH_mut_expression_&_methylation
TCGA.P5.A730	IDH_mut_expression_&_methylation
TCGA.P5.A731	IDH_mut_expression_&_methylation
TCGA.P5.A733	IDH_mut_expression_&_methylation
TCGA.P5.A735	IDH_mut_expression_&_methylation
TCGA.P5.A736	IDH_mut_expression_&_methylation
TCGA.P5.A737	IDH_mut_expression_&_methylation
TCGA.P5.A77W	IDH_mut_expression_&_methylation
TCGA.P5.A77X	IDH_mut_expression_&_methylation
TCGA.P5.A780	IDH_mut_expression_&_methylation
TCGA.P5.A781	IDH_mut_expression_&_methylation
TCGA.QH.A65R	IDH_mut_expression_&_methylation
TCGA.QH.A65S	IDH_mut_expression_&_methylation
TCGA.QH.A65V	IDH_mut_expression_&_methylation
TCGA.QH.A65X	IDH_mut_expression_&_methylation
TCGA.QH.A65Z	IDH_mut_expression_&_methylation
TCGA.QH.A6CU	IDH_mut_expression_&_methylation
TCGA.QH.A6CW	IDH_mut_expression_&_methylation
TCGA.QH.A6CY	IDH_mut_expression_&_methylation
TCGA.QH.A6CZ	IDH_mut_expression_&_methylation
TCGA.QH.A6X3	IDH_mut_expression_&_methylation
TCGA.QH.A6X4	IDH_mut_expression_&_methylation
TCGA.QH.A6X5	IDH_mut_expression_&_methylation
TCGA.QH.A6X8	IDH_mut_expression_&_methylation
TCGA.QH.A6X9	IDH_mut_expression_&_methylation
TCGA.QH.A6XA	IDH_mut_expression_&_methylation
TCGA.QH.A86X	IDH_mut_expression_&_methylation
TCGA.QH.A870	IDH_mut_expression_&_methylation
TCGA.R8.A6MK	IDH_mut_expression_&_methylation
TCGA.R8.A6ML	IDH_mut_expression_&_methylation
TCGA.R8.A6MO	IDH_mut_expression_&_methylation
TCGA.R8.A6YH	IDH_mut_expression_&_methylation
TCGA.R8.A73M	IDH_mut_expression_&_methylation
TCGA.RY.A83X	IDH_mut_expression_&_methylation
TCGA.RY.A83Y	IDH_mut_expression_&_methylation
TCGA.RY.A83Z	IDH_mut_expression_&_methylation
TCGA.RY.A840	IDH_mut_expression_&_methylation
TCGA.RY.A843	IDH_mut_expression_&_methylation
TCGA.RY.A845	IDH_mut_expression_&_methylation
TCGA.RY.A847	IDH_mut_expression_&_methylation
TCGA.S9.A6TS	IDH_mut_expression_&_methylation
TCGA.S9.A6TU	IDH_mut_expression_&_methylation
TCGA.S9.A6TV	IDH_mut_expression_&_methylation
TCGA.S9.A6TW	IDH_mut_expression_&_methylation
TCGA.S9.A6TX	IDH_mut_expression_&_methylation
TCGA.S9.A6TY	IDH_mut_expression_&_methylation
TCGA.S9.A6TZ	IDH_mut_expression_&_methylation
TCGA.S9.A6U1	IDH_mut_expression_&_methylation
TCGA.S9.A6U2	IDH_mut_expression_&_methylation
TCGA.S9.A6U5	IDH_mut_expression_&_methylation
TCGA.S9.A6U6	IDH_mut_expression_&_methylation
TCGA.S9.A6U8	IDH_mut_expression_&_methylation
TCGA.S9.A6U9	IDH_mut_expression_&_methylation
TCGA.S9.A6UB	IDH_mut_expression_&_methylation
TCGA.S9.A6WD	IDH_mut_expression_&_methylation
TCGA.S9.A6WE	IDH_mut_expression_&_methylation
TCGA.S9.A6WG	IDH_mut_expression_&_methylation
TCGA.S9.A6WH	IDH_mut_expression_&_methylation
TCGA.S9.A6WI	IDH_mut_expression_&_methylation
TCGA.S9.A6WL	IDH_mut_expression_&_methylation
TCGA.S9.A6WN	IDH_mut_expression_&_methylation
TCGA.S9.A6WO	IDH_mut_expression_&_methylation
TCGA.S9.A6WP	IDH_mut_expression_&_methylation
TCGA.S9.A6WQ	IDH_mut_expression_&_methylation
TCGA.S9.A7IQ	IDH_mut_expression_&_methylation
TCGA.S9.A7IS	IDH_mut_expression_&_methylation
TCGA.S9.A7IY	IDH_mut_expression_&_methylation
TCGA.S9.A7IZ	IDH_mut_expression_&_methylation
TCGA.S9.A7J0	IDH_mut_expression_&_methylation
TCGA.S9.A7J1	IDH_mut_expression_&_methylation
TCGA.S9.A7J2	IDH_mut_expression_&_methylation
TCGA.S9.A7J3	IDH_mut_expression_&_methylation
TCGA.S9.A7QW	IDH_mut_expression_&_methylation
TCGA.S9.A7QX	IDH_mut_expression_&_methylation
TCGA.S9.A7QY	IDH_mut_expression_&_methylation
TCGA.S9.A7QZ	IDH_mut_expression_&_methylation
TCGA.S9.A7R1	IDH_mut_expression_&_methylation
TCGA.S9.A7R3	IDH_mut_expression_&_methylation
TCGA.S9.A7R4	IDH_mut_expression_&_methylation
TCGA.S9.A7R7	IDH_mut_expression_&_methylation
TCGA.S9.A7R8	IDH_mut_expression_&_methylation
TCGA.S9.A89Z	IDH_mut_expression_&_methylation
TCGA.TM.A7C4	IDH_mut_expression_&_methylation
TCGA.TM.A7C5	IDH_mut_expression_&_methylation
TCGA.TM.A7CA	IDH_mut_expression_&_methylation
TCGA.TM.A7CF	IDH_mut_expression_&_methylation
TCGA.TM.A84F	IDH_mut_expression_&_methylation
TCGA.TM.A84G	IDH_mut_expression_&_methylation
TCGA.TM.A84H	IDH_mut_expression_&_methylation
TCGA.TM.A84I	IDH_mut_expression_&_methylation
TCGA.TM.A84L	IDH_mut_expression_&_methylation
TCGA.TM.A84M	IDH_mut_expression_&_methylation
TCGA.TM.A84O	IDH_mut_expression_&_methylation
TCGA.TM.A84Q	IDH_mut_expression_&_methylation
TCGA.TM.A84R	IDH_mut_expression_&_methylation
TCGA.TM.A84S	IDH_mut_expression_&_methylation
TCGA.TM.A84T	IDH_mut_expression_&_methylation
TCGA.TQ.A7RF	IDH_mut_expression_&_methylation
TCGA.TQ.A7RG	IDH_mut_expression_&_methylation
TCGA.TQ.A7RH	IDH_mut_expression_&_methylation
TCGA.TQ.A7RI	IDH_mut_expression_&_methylation
TCGA.TQ.A7RJ	IDH_mut_expression_&_methylation
TCGA.TQ.A7RK	IDH_mut_expression_&_methylation
TCGA.TQ.A7RM	IDH_mut_expression_&_methylation
TCGA.TQ.A7RN	IDH_mut_expression_&_methylation
TCGA.TQ.A7RO	IDH_mut_expression_&_methylation
TCGA.TQ.A7RQ	IDH_mut_expression_&_methylation
TCGA.TQ.A7RR	IDH_mut_expression_&_methylation
TCGA.TQ.A7RS	IDH_mut_expression_&_methylation
TCGA.TQ.A7RV	IDH_mut_expression_&_methylation
TCGA.TQ.A7RW	IDH_mut_expression_&_methylation
TCGA.TQ.A8XE	IDH_mut_expression_&_methylation
TCGA.VM.A8C8	IDH_mut_expression_&_methylation
TCGA.VM.A8CA	IDH_mut_expression_&_methylation
TCGA.VM.A8CB	IDH_mut_expression_&_methylation
TCGA.VM.A8CE	IDH_mut_expression_&_methylation
TCGA.VM.A8CF	IDH_mut_expression_&_methylation
TCGA.VM.A8CH	IDH_mut_expression_&_methylation
TCGA.VV.A829	IDH_mut_expression_&_methylation
TCGA.VV.A86M	IDH_mut_expression_&_methylation
TCGA.VW.A7QS	IDH_mut_expression_&_methylation
TCGA.W9.A837	IDH_mut_expression_&_methylation
TCGA.WH.A86K	IDH_mut_expression_&_methylation
TCGA.WY.A858	IDH_mut_expression_&_methylation
TCGA.WY.A859	IDH_mut_expression_&_methylation
TCGA.WY.A85A	IDH_mut_expression_&_methylation
TCGA.WY.A85B	IDH_mut_expression_&_methylation
TCGA.WY.A85C	IDH_mut_expression_&_methylation
TCGA.WY.A85D	IDH_mut_expression_&_methylation
TCGA.WY.A85E	IDH_mut_expression_&_methylation
TCGA.06.1804	IDH_wt_expression_&_methylation
TCGA.06.5408	IDH_wt_expression_&_methylation
TCGA.06.5410	IDH_wt_expression_&_methylation
TCGA.06.5411	IDH_wt_expression_&_methylation
TCGA.06.5412	IDH_wt_expression_&_methylation
TCGA.06.5413	IDH_wt_expression_&_methylation
TCGA.06.5414	IDH_wt_expression_&_methylation
TCGA.06.5418	IDH_wt_expression_&_methylation
TCGA.06.5856	IDH_wt_expression_&_methylation
TCGA.06.5858	IDH_wt_expression_&_methylation
TCGA.06.5859	IDH_wt_expression_&_methylation
TCGA.12.5295	IDH_wt_expression_&_methylation
TCGA.12.5299	IDH_wt_expression_&_methylation
TCGA.14.0781	IDH_wt_expression_&_methylation
TCGA.19.5960	IDH_wt_expression_&_methylation
TCGA.26.5132	IDH_wt_expression_&_methylation
TCGA.26.5133	IDH_wt_expression_&_methylation
TCGA.26.5134	IDH_wt_expression_&_methylation
TCGA.26.5135	IDH_wt_expression_&_methylation
TCGA.26.5136	IDH_wt_expression_&_methylation
TCGA.26.5139	IDH_wt_expression_&_methylation
TCGA.28.2510	IDH_wt_expression_&_methylation
TCGA.28.5204	IDH_wt_expression_&_methylation
TCGA.28.5207	IDH_wt_expression_&_methylation
TCGA.28.5208	IDH_wt_expression_&_methylation
TCGA.28.5209	IDH_wt_expression_&_methylation
TCGA.28.5213	IDH_wt_expression_&_methylation
TCGA.28.5215	IDH_wt_expression_&_methylation
TCGA.28.5216	IDH_wt_expression_&_methylation
TCGA.28.5218	IDH_wt_expression_&_methylation
TCGA.28.5220	IDH_wt_expression_&_methylation
TCGA.32.1980	IDH_wt_expression_&_methylation
TCGA.32.5222	IDH_wt_expression_&_methylation
TCGA.41.5651	IDH_wt_expression_&_methylation
TCGA.76.4925	IDH_wt_expression_&_methylation
TCGA.76.4926	IDH_wt_expression_&_methylation
TCGA.76.4927	IDH_wt_expression_&_methylation
TCGA.76.4928	IDH_wt_expression_&_methylation
TCGA.76.4929	IDH_wt_expression_&_methylation
TCGA.76.4931	IDH_wt_expression_&_methylation
TCGA.76.4932	IDH_wt_expression_&_methylation
TCGA.CS.4941	IDH_wt_expression_&_methylation
TCGA.CS.5395	IDH_wt_expression_&_methylation
TCGA.CS.5397	IDH_wt_expression_&_methylation
TCGA.CS.6186	IDH_wt_expression_&_methylation
TCGA.CS.6188	IDH_wt_expression_&_methylation
TCGA.CS.6669	IDH_wt_expression_&_methylation
TCGA.DB.A64O	IDH_wt_expression_&_methylation
TCGA.DB.A75P	IDH_wt_expression_&_methylation
TCGA.DH.5140	IDH_wt_expression_&_methylation
TCGA.DU.5847	IDH_wt_expression_&_methylation
TCGA.DU.5852	IDH_wt_expression_&_methylation
TCGA.DU.5854	IDH_wt_expression_&_methylation
TCGA.DU.6392	IDH_wt_expression_&_methylation
TCGA.DU.6402	IDH_wt_expression_&_methylation
TCGA.DU.6403	IDH_wt_expression_&_methylation
TCGA.DU.6404	IDH_wt_expression_&_methylation
TCGA.DU.6405	IDH_wt_expression_&_methylation
TCGA.DU.6406	IDH_wt_expression_&_methylation
TCGA.DU.7006	IDH_wt_expression_&_methylation
TCGA.DU.7012	IDH_wt_expression_&_methylation
TCGA.DU.7013	IDH_wt_expression_&_methylation
TCGA.DU.7290	IDH_wt_expression_&_methylation
TCGA.DU.7292	IDH_wt_expression_&_methylation
TCGA.DU.8158	IDH_wt_expression_&_methylation
TCGA.DU.8161	IDH_wt_expression_&_methylation
TCGA.DU.8162	IDH_wt_expression_&_methylation
TCGA.DU.8165	IDH_wt_expression_&_methylation
TCGA.DU.A5TT	IDH_wt_expression_&_methylation
TCGA.DU.A5TY	IDH_wt_expression_&_methylation
TCGA.DU.A76K	IDH_wt_expression_&_methylation
TCGA.DU.A76L	IDH_wt_expression_&_methylation
TCGA.DU.A7TB	IDH_wt_expression_&_methylation
TCGA.DU.A7TD	IDH_wt_expression_&_methylation
TCGA.DU.A7TJ	IDH_wt_expression_&_methylation
TCGA.E1.A7YD	IDH_wt_expression_&_methylation
TCGA.E1.A7YJ	IDH_wt_expression_&_methylation
TCGA.E1.A7YL	IDH_wt_expression_&_methylation
TCGA.E1.A7YM	IDH_wt_expression_&_methylation
TCGA.E1.A7YN	IDH_wt_expression_&_methylation
TCGA.E1.A7YQ	IDH_wt_expression_&_methylation
TCGA.E1.A7Z2	IDH_wt_expression_&_methylation
TCGA.FG.5963	IDH_wt_expression_&_methylation
TCGA.FG.6688	IDH_wt_expression_&_methylation
TCGA.FG.6692	IDH_wt_expression_&_methylation
TCGA.FG.7643	IDH_wt_expression_&_methylation
TCGA.FG.8181	IDH_wt_expression_&_methylation
TCGA.FG.A4MU	IDH_wt_expression_&_methylation
TCGA.FG.A4MW	IDH_wt_expression_&_methylation
TCGA.FG.A70Z	IDH_wt_expression_&_methylation
TCGA.FG.A87Q	IDH_wt_expression_&_methylation
TCGA.HT.7469	IDH_wt_expression_&_methylation
TCGA.HT.7680	IDH_wt_expression_&_methylation
TCGA.HT.7691	IDH_wt_expression_&_methylation
TCGA.HT.7854	IDH_wt_expression_&_methylation
TCGA.HT.7857	IDH_wt_expression_&_methylation
TCGA.HT.7860	IDH_wt_expression_&_methylation
TCGA.HT.7882	IDH_wt_expression_&_methylation
TCGA.HT.8011	IDH_wt_expression_&_methylation
TCGA.HT.8015	IDH_wt_expression_&_methylation
TCGA.HT.8019	IDH_wt_expression_&_methylation
TCGA.HT.8104	IDH_wt_expression_&_methylation
TCGA.HT.8107	IDH_wt_expression_&_methylation
TCGA.HT.8110	IDH_wt_expression_&_methylation
TCGA.HT.8558	IDH_wt_expression_&_methylation
TCGA.HT.8564	IDH_wt_expression_&_methylation
TCGA.HT.A4DS	IDH_wt_expression_&_methylation
TCGA.HT.A5RA	IDH_wt_expression_&_methylation
TCGA.HT.A5RC	IDH_wt_expression_&_methylation
TCGA.HT.A617	IDH_wt_expression_&_methylation
TCGA.HT.A61C	IDH_wt_expression_&_methylation
TCGA.HT.A74H	IDH_wt_expression_&_methylation
TCGA.HW.A5KK	IDH_wt_expression_&_methylation
TCGA.KT.A7W1	IDH_wt_expression_&_methylation
TCGA.P5.A5EY	IDH_wt_expression_&_methylation
TCGA.P5.A5F6	IDH_wt_expression_&_methylation
TCGA.P5.A72U	IDH_wt_expression_&_methylation
TCGA.QH.A6CV	IDH_wt_expression_&_methylation
TCGA.QH.A6CX	IDH_wt_expression_&_methylation
TCGA.QH.A6XC	IDH_wt_expression_&_methylation
TCGA.S9.A6U0	IDH_wt_expression_&_methylation
TCGA.S9.A6UA	IDH_wt_expression_&_methylation
TCGA.S9.A6WM	IDH_wt_expression_&_methylation
TCGA.S9.A7IX	IDH_wt_expression_&_methylation
TCGA.S9.A7R2	IDH_wt_expression_&_methylation
TCGA.S9.A89V	IDH_wt_expression_&_methylation
TCGA.TM.A7C3	IDH_wt_expression_&_methylation
TCGA.TM.A84B	IDH_wt_expression_&_methylation
TCGA.TM.A84C	IDH_wt_expression_&_methylation
TCGA.TM.A84J	IDH_wt_expression_&_methylation
TCGA.TQ.A7RP	IDH_wt_expression_&_methylation
TCGA.VM.A8C9	IDH_wt_expression_&_methylation
TCGA.VM.A8CD	IDH_wt_expression_&_methylation
TCGA.VW.A8FI	IDH_wt_expression_&_methylation
