# Supplementary material for: Transcriptional alterations in glioma result primarily from DNA methylation–independent mechanisms
Source: HighWire-hosted journal article supplement (doi:10.1101/gr.249219.119), 2019-09-18
Supplement: Supplemental_Table_S6.xlsx.xlsx [file Supplemental_Table_S6.xlsx.xlsx]

## Sheet: Feuil1
Supplemental_Table_S6.xlsx Primers list
Transcript Analyses							ChIP Analyses					Bisulfite Methylation Analysis
Locus	Chr	Primer name	Primer sequences 5' > 3'	Hg19 primer positions (5' > 3')			Primer name	Primer sequences 5' > 3'	Hg19 primer positions (5' > 3')			Primer name	Primer sequences 5' > 3'	Hg19 primer positions (5' > 3')
PCSK6	15	PCSK6-F	GGTACCTCAACTTGGGCCAG	102029579	102029598		PCSK6-prom-CHiP-F	CGGACAGGACTGCGGAGGCG	102029495	102029514		PCSK6-bisulfite-F	GTTTGYGAGTTTTGTTGGGAG	102030339	102030358
		PCSK6-R	TTCGCACCTGTCTCTTCACC	101972251	101972270		PCSK6-prom-CHiP-R	CCCGTCTACACCAACCACTG	102029655	102029674		PCSK6-bisulfite-R	ACCTACCTCCCAACATAAAC	102030500	102030519
MAL	2	MAL-F	GCTGGGTGATGTTCGTGTCT	95713768	95713787		MAL-prom-CHiP-F	GGGCTCCCCTGCTCTTAAC	95691411	95691430
		MAL-R	GACTGAGGCGCTGAGGTAAA	95715357	95715376		MAL-prom-CHiP-R	TGAAGACCGAGAAGCCACTG	95691576	95691595
NKAIN2	6	NKAIN2-F	AGAATCCCAGTGCAGACAGC	125144960	125144979		NKAIN2-prom-CHiP-F	AAGGTATGTGTGGCGGGCGC	124125123	124125142
		NKAIN2-R	GCCACCATGGAGGCTCTATG	125145130	125145149		NKAIN2-prom-CHiP-R	CAGACTGTCCCACGTCGG	124125302	124125321
SH3GL3	15	SH3GL3-F	GGGGAAGACTCCACCTTTGG	84237406	84237425		SH3GL3-prom-CHiP-F	CAGCAAGAAGCACTGTGTGA	84115901	84115920
		SH3GL3-R	TAATCGTAATCCAGGCGGCG	84245359	84245378		SH3GL3-prom-CHiP-R	GCAACACTGCGTTCCAAAGC	84116081	84116100
E2F2	1	E2F2-F1	AAGCGGCGCATCTATGACAT	23848392	23848411		E2F2-prom-CHiP-F	TGCTGCCGCCTTTCACACGG	23857349	23857368
		E2F2-R1	CTGGATGAGCTGGTCCAAGG	23847455	23847474		E2F2-prom-CHiP-R	GGACGAGACAGCCCCTGGCA	23857517	23857536
TBP	6	TBP-F	TGCCCGAAACGCCGAATATA	170873693	170873712		TBP-prom-CHiP-F	AACACAGCAGAGTAGGGCAC	170863734	170863753
		TBP-R	CGTGGTTCGTGGCTCTCTTA	17087603	170876050		TBP-prom-CHiP-R	TGTACTCTTTTCTGACGGTTCG	170863561	170863582
							SP6-prom-CHiP-F	TGCAGGAGCTTGGAAAAGGG	45925506	45925525
							SP6-prom-CHiP-R	ACTTACCAGGGCCACACGAG	45925686	45925705
PPIA	7	PPIA-F	TCTGGTTCCTTCTGCGTGAA	44842554	44842573
		PPIA-R	CACCCAGGGAATACGTAACCA	44842617	44842637
HOXD1	2	HOXD1-F	GCACGTTCGAGTGGATGAAA	177054137	177054156
		HOXD1-R	GTCAGTTGCTTGGTGCTGAA	17705458	177054608
BIN1	2	BIN-F	CTCAATGATGTGCTGGTCGG	127819742	127819761
		BIN-R	GGCTCGTGGTTGACTCTGAT	127816642	127816661
MAP1A	15	MAP1A-F	AGTTTAGAGCCTGGGGGAGA	43813227	43813246
		MAP1A-R	TCACCTTCCCCTAAGCAGGA	43813576	43813595
HOXD9	2	HOXD9-F	GGACGCCTCAAAATGTCTTCC	176987515	176987535
		HOXD9-R	GTCGCCCTCATGGCCTATAA	176987570	176987589
AVPR1A	12	AVPR1A-F	GCGCCTTTCTTCATCATCCA	63543685	63543704
		AVPR1A-R	GATGGTGATGGTAGGGTTTTCC	63541400	63541421
HOXC11	12	HOXC11-F	CGGCTTCTACTCCTCAGTCA	54367430	54367449
		HOXC11-R	CAGTAGGCGTTGTCGAAGAAA	54367484	54367504
HOXA13	7	HOXA13-F	GCCAAATGTACTGCCCCAAA	27238818	27238837
		HOXA13-R	CATCCGAGGGATGGGAGACC	27238038	27238057
HOXC10	12	HOXC10-F	GCCCAGACACCTCGGATAA	54379765	54379784
		HOXC10-R	ATAGGGGCACCTCTTCTTCC	54383007	54383026
F3	1	F3-F	TCCCCAGAGTTCACACCTTAC	95001528	95001548
		F3-R	CACTTTTGTTCCCACCTGTTCA	94998772	94998793
VEGFA	6	VEGFA-F	GAGGAGGGCAGAATCATCAC	43742106	43742125
		VEGFA-R	GTCTCGATTGGATGGCAGTA	43745238	43745257
PIWIL4	11	PIWIL4-F	GGGAACAAGCAGGATCTCAA	94301949	94301968
		PIWIL4-R	ACACCTCTTTCCATGAAGGTAC	94308198	94308219
VLDLR	9	VLDLR-F	GCGCCCATTCTACTCAGTGT	2641413	2641432
		VLDLR-R	AGTCATCCTGGCCATTGCAT	2643227	2643246
PDGFA	7	PDGFA-F	GCCCATTCGGAGGAAGAGAA	551994	552013
		PDGFA-R	CTGACTCCGAGGAATCTCGTAAA	550572	550594
HOXA5	7	HOXD-A5-F	CATTTTGCGGTCGCTATCCA	27183185	27183204
		HOXD-A5-R	AATTGCTCGCTCACGGAACT	27183126	27183145
THBD	20	THBD-F	TGCCACTGCTACCCTAACTAC	23029077	23029097
		THBD-R	TACTCGCAGTTGGCTCTGAA	23029015	23029034
HOXD-AS2	2	HOXD-AS2-F	GTGACTGGAGCCCACCTCTG	177001360	177001379
		HOXD-AS2-R	AGGAAGGTTCTGAAGGCTGC	177000054	177000073
GDF15	19	GDF15-F	GTTGCACTCCGAAGACTCCA	18497134	18497153
		GDF15-R1	GAGAGATACGCAGGTGCAGG	18499118	18499137
ATOH8	2	ATOH8-F	CTTCGAGGCGCTCAGGAAGC	85982059	85982078
		ATOH8-R	CGCCAGGGACAGGATGTAGT	85991175	85991194
RPL13A	19	RPL13A-F	CTCCTGGTCTGAGCCCAATAA	49995061	49995081
		RPL13A-R	CGTACATTCCAGGGCAACAA	49995121	49995140
